# Supplementary material for: The amygdala instructs insular feedback for affective learning
Source: eLife. 2020 Nov 20;9:e60336. doi: 10.7554/eLife.60336 (PMC7679142; doi:10.7554/eLife.60336)
Supplement: Figure 1—figure supplement 1—source data 1. [file elife-60336-fig1-figsupp1-data1.xlsx]

## Sheet: CEsham
	Frontal.Pole.L	Frontal.Pole.R	Orbital.Area.L	Orbital.Area.R	Prelimbic.Area.L	Prelimbic.Area.R	Infralimbic.Area.L	Infralimbic.Area.R	Anterior.cingulate.Area.L	Anterior.cingulate.Area.R	Insular Cortex.L	Insular Cortex.R	Retrosplenial.Area.L	Retrosplenial.Area.R	Post.parietal.assoc.L	Post.parietal.assoc.R	Temporal.association.area.L	Temporal.association.area.R	Somatomotor.Areas.L	Somatomotor.Areas.R	Somatosensory.Areas.L	Somatosensory.Areas.R	Auditory.Area.L	Auditory.Area.R	Visual.Area.L	Visual.Area.R	Perirhinal.area.L	Perirhinal.area.R	Ectorhinal.area.L	Ectorhinal.Area.R	Piriform.L	Piriform.R	Entorhinal.Area.L	Entorhinal.Area.R	Hippocampus.L	Hippocampus.R	Central Amygdala.L	Central Amygdala.R	Amygdala.cortex.L	Amygdala.cortex.R	Caudoputamen.L	Caudoputamen.R	Accumbens.L	Accumbens.R	Lateral.septal.complex.L	Lateral.septal.complex.R	Pallidium.dorsal.L	Pallidium.dorsal.R	Pallidium.ventral.L
Frontal.Pole.L	1	0.414004	0.165645	0.201986	0.335221	0	0	0.184566	0	-0.136673	0	0.249639	0	-0.156667	0	0	0	0	0	0	-0.253875	0	0	0	0	0	0	0.312802	0	0	-0.140477	0.174346	0.209673	-0.18424	0	0	0	0	0	0.136179	0	0	0	0	0	0.178619	-0.169208	0	0
Frontal.Pole.R	0.414004	1	-0.193603	0.400343	0.165809	0.400618	-0.222066	0	0	0	0	0	-0.139746	-0.244766	0	-0.135243	0	0	0.178862	0	0	0	0	0	0	-0.167026	0	0.133796	0	0	-0.145152	0.262261	0.230274	-0.137272	0	0	0	0	-0.149337	-0.184768	-0.152409	0.245086	0	-0.146669	0	0	0	0	0
Orbital.Area.L	0.165645	-0.193603	1	0.178014	0	-0.252104	0.355476	0	0	0	0	0.341077	-0.176457	0	0	-0.171468	0	0	0	0	0	0	0.143331	-0.164231	0	0.248057	0	-0.134029	0	0	0	0	0	0	0.153307	0.264227	-0.253615	0.14416	-0.224977	0	0.160669	0.157267	0.240107	0	0	0	-0.228043	0	0
Orbital.Area.R	0.201986	0.400343	0.178014	1	0	0	0	0.260017	0	-0.133833	0.148372	0	-0.226074	-0.131492	0	0	0	0	0	0	0	0	0.14564	-0.220181	0	0	0	0.33073	-0.144046	0	0	0.437327	0.165771	0	0.245266	0	0	0	-0.134789	0	0	0	0.216871	0.135592	0.134	0.202255	0	-0.174709	0
Prelimbic.Area.L	0.335221	0.165809	0	0	1	0.530434	0.35644	0.301165	0	0	0	0.320156	0	-0.319188	0	0.172633	0	0.139027	0.160132	-0.139902	0	-0.187507	0	0	0	0	0	0	0	0	0	0.238049	0	0	0	0.159834	-0.210932	0	0	0	0.13271	0.410616	0.219987	0.259166	0.291795	0.300746	0	0	0.130127
Prelimbic.Area.R	0	0.400618	-0.252104	0	0.530434	1	0.149608	0.241669	0	0.263948	0	0	0	-0.254464	0	0.131784	0	0	0	0.187444	0	-0.205918	-0.212061	0	0	-0.147051	0	0	0	0	0	0.19089	0	0	0	0	-0.300005	0	0	-0.215807	0	0.275262	0.137251	0	0.224819	0	-0.163088	0	0
Infralimbic.Area.L	0	-0.222066	0.355476	0	0.35644	0.149608	1	0.441058	0	0	0	0	0	0	0	0	0	0	0	0	-0.222321	-0.214518	0	-0.180543	0	0	0	0.149748	-0.242973	0	0	0	0	0	0.15753	0	-0.172772	0.161618	0	0	0	0	0.424399	0.371273	0.34203	0.306378	-0.174443	-0.206156	0
Infralimbic.Area.R	0.184566	0	0	0.260017	0.301165	0.241669	0.441058	1	0	0	0	0.188198	-0.305127	-0.321766	-0.366691	-0.21639	-0.359473	0	-0.368054	0	-0.257282	-0.407915	0	-0.203864	-0.358609	-0.235915	0	0.332801	-0.241909	0	0.280044	0.383453	0	-0.182991	0	0	0	0.202165	0	0	0.316365	0.329593	0.536992	0.509222	0.218021	0.46608	-0.211561	0	0.400769
Anterior.cingulate.Area.L	0	0	0	0	0	0	0	0	1	0.44232	0	0	0.21941	0	0	0.331986	0	0.150372	0.20856	0.241179	0.443464	-0.321587	-0.387568	0.399765	0	0.240735	0	0	0	0	0.403344	0.149544	0	0	-0.217972	0	0	0	0.366408	0	0.142708	0	0	0.160062	0.21978	0.343946	0	0.329184	0
Anterior.cingulate.Area.R	-0.136673	0	0	-0.133833	0	0.263948	0	0	0.44232	1	-0.202402	0	0.157051	0	0.143716	0.174448	0	0	0.139035	0.629862	0.494384	-0.161463	-0.377588	0.33344	0	0.276115	0	0	0.156612	0	0	0	0.242965	0	0	0	-0.195289	0.218614	0.242198	0	0	0.149393	0	0	0	0	-0.174916	0.169553	0
Insular Cortex.L	0	0	0	0.148372	0	0	0	0	0	-0.202402	1	0.141084	0	0	0	0.14113	-0.129817	-0.39734	0.296851	0	0	0	0	0	0	-0.230697	0	-0.154091	-0.13301	-0.344161	0.160432	0	-0.466066	0.135225	-0.242419	-0.211554	0.397791	-0.156869	0.25388	0	0.256366	0	0.165161	0.242278	0.201878	0.207794	0.150441	0.226002	0.366148
Insular Cortex.R	0.249639	0	0.341077	0	0.320156	0	0	0.188198	0	0	0.141084	1	-0.39931	-0.289523	0	-0.191752	-0.182086	0	0	-0.219833	0	0.175942	0	-0.319695	-0.416901	0	0	0	-0.142743	0	0	0.451363	-0.248979	-0.37268	0	-0.204172	0	0.309163	0	0.178163	0.4821	0.517469	0.418001	0.367164	0.495413	0.393814	0	0.265611	0.567889
Retrosplenial.Area.L	0	-0.139746	-0.176457	-0.226074	0	0	0	-0.305127	0.21941	0.157051	0	-0.39931	1	0.686216	0.355752	0.538553	0.284448	0.238013	0	0.268032	0	0	0	0.248593	0.584674	0.537042	0	-0.165304	0.28185	0.165014	-0.242092	-0.368745	-0.323504	0.339178	0	0	0	-0.257417	0	-0.368433	-0.319367	-0.508197	-0.471857	-0.214304	-0.337568	-0.251365	0	0	-0.516044
Retrosplenial.Area.R	-0.156667	-0.244766	0	-0.131492	-0.319188	-0.254464	0	-0.321766	0	0	0	-0.289523	0.686216	1	0.386569	0.295287	0.308636	0.283447	0	0.175847	0	0.234083	0.232392	0	0.519859	0.540287	0	0	0.166331	0.251478	-0.312753	-0.283897	0	0	0	-0.18258	0	0	0	0	-0.325081	-0.569091	-0.408621	-0.132938	-0.447128	-0.240979	0	-0.280608	-0.202391
Post.parietal.assoc.L	0	0	0	0	0	0	0	-0.366691	0	0.143716	0	0	0.355752	0.386569	1	0.397525	0.333118	0.198146	0.365198	0.132504	0	0.320954	0.197468	0	0.560022	0.277582	0	0	0.147982	0.282023	-0.150747	0	0	0	0	-0.218205	0	-0.143638	0	0.139638	0	-0.182073	-0.271006	0	0	0	0	-0.306578	-0.139048
Post.parietal.assoc.R	0	-0.135243	-0.171468	0	0.172633	0.131784	0	-0.21639	0.331986	0.174448	0.14113	-0.191752	0.538553	0.295287	0.397525	1	0.304972	0.40386	0	0.356737	0.170161	-0.189585	-0.406137	0.612082	0.363411	0.483061	0.394651	0	0.344085	0.271328	0	0	-0.310081	0.366458	-0.273403	0.229767	0	-0.147815	0.386428	-0.327646	-0.359718	-0.306937	-0.370527	-0.149937	-0.248885	-0.154053	0	0	-0.313732
Temporal.association.area.L	0	0	0	0	0	0	0	-0.359473	0	0	-0.129817	-0.182086	0.284448	0.308636	0.333118	0.304972	1	0.201347	0	0.205549	0	0.220397	0	0.299971	0.459477	0.136284	0.517432	0	0.674358	0.145069	-0.152011	0	0	0.21069	0	0.151449	0	0	0	-0.136096	-0.424139	-0.302549	-0.385444	-0.195781	-0.285618	-0.370048	0	-0.24184	-0.260249
Temporal.association.area.R	0	0	0	0	0.139027	0	0	0	0.150372	0	-0.39734	0	0.238013	0.283447	0.198146	0.40386	0.201347	1	0	0.223365	0	0	0	0.432997	0	0.426122	0	0.18934	0	0.810643	0	0	0	0	-0.310726	0.164148	0	0.170454	0	-0.21492	-0.216208	0	0	0	-0.22792	0	-0.219366	0	-0.21146
Somatomotor.Areas.L	0	0.178862	0	0	0.160132	0	0	-0.368054	0.20856	0.139035	0.296851	0	0	0	0.365198	0	0	0	1	0.21553	0.381299	0.365078	0	0	0.158434	0	-0.282187	-0.288464	-0.23568	0	-0.274274	0	0	0	0	-0.230515	0.156934	-0.140677	-0.169654	0	0	0	0	0	0.167073	0.234932	0.197564	0.161383	0
Somatomotor.Areas.R	0	0	0	0	-0.139902	0.187444	0	0	0.241179	0.629862	0	-0.219833	0.268032	0.175847	0.132504	0.356737	0.205549	0.223365	0.21553	1	0.533843	0	-0.405491	0.513938	0.232763	0.299335	0	0	0.26626	0	0	-0.229345	0	0	-0.325998	0.266133	-0.162847	0.16061	0.147703	-0.14444	-0.242597	0	-0.211632	-0.357236	-0.208651	0	-0.389162	0.150593	-0.265947
Somatosensory.Areas.L	-0.253875	0	0	0	0	0	-0.222321	-0.257282	0.443464	0.494384	0	0	0	0	0	0.170161	0	0	0.381299	0.533843	1	0	-0.475439	0.55669	-0.143187	0	-0.239837	-0.162131	0	-0.139569	0	-0.19993	0	0	-0.369462	0	0	0	0.17902	0	0	0.145433	0	-0.178396	0	0	-0.29769	0.498264	0
Somatosensory.Areas.R	0	0	0	0	-0.187507	-0.205918	-0.214518	-0.407915	-0.321587	-0.161463	0	0.175942	0	0.234083	0.320954	-0.189585	0.220397	0	0.365078	0	0	1	0.430269	-0.2526	0	0	-0.27817	-0.19478	-0.23261	0	-0.337197	-0.151342	-0.172209	-0.131157	0	-0.418236	0.184743	0	-0.387783	0	0	0	-0.190038	-0.162143	0	0	0	-0.229347	0
Auditory.Area.L	0	0	0.143331	0.14564	0	-0.212061	0	0	-0.387568	-0.377588	0	0	0	0.232392	0.197468	-0.406137	0	0	0	-0.405491	-0.475439	0.430269	1	-0.683621	0	0	-0.23108	0	-0.351394	0.221231	-0.27987	0	0	-0.2096	0.219725	-0.425199	0	0	-0.663438	0.161529	0	0	-0.147505	0	0	0	0.405856	-0.371109	0
Auditory.Area.R	0	0	-0.164231	-0.220181	0	0	-0.180543	-0.203864	0.399765	0.33344	0	-0.319695	0.248593	0	0	0.612082	0.299971	0.432997	0	0.513938	0.55669	-0.2526	-0.683621	1	0	0.280742	0.183461	0	0.406132	0.152351	0.153332	-0.222053	0	0.269285	-0.479481	0.52868	0	0	0.52066	-0.251875	-0.412365	-0.169452	-0.276871	-0.285424	-0.312972	-0.192662	-0.438622	0.285433	-0.308219
Visual.Area.L	0	0	0	0	0	0	0	-0.358609	0	0	0	-0.416901	0.584674	0.519859	0.560022	0.363411	0.459477	0	0.158434	0.232763	-0.143187	0	0	0	1	0.310965	0.267409	-0.143797	0.344017	0	0	-0.195802	0	0.253179	0.253035	0	0	-0.191673	0.130499	0	-0.206727	-0.409932	-0.407977	-0.198277	-0.285452	-0.298207	0.200757	-0.204974	-0.309884
Visual.Area.R	0	-0.167026	0.248057	0	0	-0.147051	0	-0.235915	0.240735	0.276115	-0.230697	0	0.537042	0.540287	0.277582	0.483061	0.136284	0.426122	0	0.299335	0	0	0	0.280742	0.310965	1	0	0	0.173142	0.269713	-0.188467	0	-0.154223	0	0	0	-0.198651	0.141697	0	0	-0.226373	-0.357038	-0.253049	-0.31132	-0.237323	-0.282844	-0.150268	0	-0.341115
Perirhinal.area.L	0	0	0	0	0	0	0	0	0	0	0	0	0	0	0	0.394651	0.517432	0	-0.282187	0	-0.239837	-0.27817	-0.23108	0.183461	0.267409	0	1	0	0.582594	0	0.201037	0.205503	0	0.208569	0.188448	0.284806	0	-0.192515	0.279625	0	0	0	-0.177854	0	0	-0.287506	0	-0.23691	0
Perirhinal.area.R	0.312802	0.133796	-0.134029	0.33073	0	0	0.149748	0.332801	0	0	-0.154091	0	-0.165304	0	0	0	0	0.18934	-0.288464	0	-0.162131	-0.19478	0	0	-0.143797	0	0	1	-0.136261	0.267408	0	0.293584	0.25129	-0.317781	0.139486	-0.180736	0.191875	0.264764	0.205793	0.354502	0	0	0	0	0	0.210092	0	0	0
Ectorhinal.area.L	0	0	0	-0.144046	0	0	-0.242973	-0.241909	0	0.156612	-0.13301	-0.142743	0.28185	0.166331	0.147982	0.344085	0.674358	0	-0.23568	0.26626	0	-0.23261	-0.351394	0.406132	0.344017	0.173142	0.582594	-0.136261	1	0	0	0	0	0.302822	0	0.319452	0	0	0.278055	0	-0.262418	0	-0.261592	-0.181804	-0.259403	-0.421228	-0.146067	0	-0.179523
Ectorhinal.Area.R	0	0	0	0	0	0	0	0	0	0	-0.344161	0	0.165014	0.251478	0.282023	0.271328	0.145069	0.810643	0	0	-0.139569	0	0.221231	0.152351	0	0.269713	0	0.267408	0	1	0	0.152427	0	0	0	0	0	0.187915	0	0	0	0	0	0	-0.203041	0	0	-0.149783	0
Piriform.L	-0.140477	-0.145152	0	0	0	0	0	0.280044	0.403344	0	0.160432	0	-0.242092	-0.312753	-0.150747	0	-0.152011	0	-0.274274	0	0	-0.337197	-0.27987	0.153332	0	-0.188467	0.201037	0	0	0	1	0.325681	0	0	0	0	0	0.280089	0.335216	0.295218	0.4019	0.314584	0.481586	0.308437	0.321819	0.38932	0	0.216584	0.34442
Piriform.R	0.174346	0.262261	0	0.437327	0.238049	0.19089	0	0.383453	0.149544	0	0	0.451363	-0.368745	-0.283897	0	0	0	0	0	-0.229345	-0.19993	-0.151342	0	-0.222053	-0.195802	0	0.205503	0.293584	0	0.152427	0.325681	1	0	0	0.170043	0	0.150949	0.20873	0.133514	0.243386	0.359544	0.477411	0.457431	0.566869	0.259578	0.259823	0	0	0.56734
Entorhinal.Area.L	0.209673	0.230274	0	0.165771	0	0	0	0	0	0.242965	-0.466066	-0.248979	-0.323504	0	0	-0.310081	0	0	0	0	0	-0.172209	0	0	0	-0.154223	0	0.25129	0	0	0	0	1	-0.235519	0.182672	0	-0.136269	0	0	0.28919	0	0	0	-0.149151	0	0	0	-0.179407	0
Entorhinal.Area.R	-0.18424	-0.137272	0	0	0	0	0	-0.182991	0	0	0.135225	-0.37268	0.339178	0	0	0.366458	0.21069	0	0	0	0	-0.131157	-0.2096	0.269285	0.253179	0	0.208569	-0.317781	0.302822	0	0	0	-0.235519	1	0	0.423147	0	-0.409163	0.327641	-0.307682	-0.15375	-0.245434	-0.260026	0	-0.40686	-0.384741	0.137231	0	-0.305039
Hippocampus.L	0	0	0.153307	0.245266	0	0	0.15753	0	-0.217972	0	-0.242419	0	0	0	0	-0.273403	0	-0.310726	0	-0.325998	-0.369462	0	0.219725	-0.479481	0.253035	0	0.188448	0.139486	0	0	0	0.170043	0.182672	0	1	0	-0.148596	0	0	0.200163	0	0	0	0.314514	0	0	0.411392	-0.320919	0
Hippocampus.R	0	0	0.264227	0	0.159834	0	0	0	0	0	-0.211554	-0.204172	0	-0.18258	-0.218205	0.229767	0.151449	0.164148	-0.230515	0.266133	0	-0.418236	-0.425199	0.52868	0	0	0.284806	-0.180736	0.319452	0	0	0	0	0.423147	0	1	-0.203846	0	0.275625	-0.25687	-0.312253	0	0	0	-0.285843	-0.263912	-0.373974	0	-0.227931
Central Amygdala.L	0	0	-0.253615	0	-0.210932	-0.300005	-0.172772	0	0	-0.195289	0.397791	0	0	0	0	0	0	0	0.156934	-0.162847	0	0.184743	0	0	0	-0.198651	0	0.191875	0	0	0	0.150949	-0.136269	0	-0.148596	-0.203846	1	0.14161	0.389024	0.245496	0	0	0	0.170757	0	0	0.237066	0	0.436338
Central Amygdala.R	0	0	0.14416	0	0	0	0.161618	0.202165	0	0.218614	-0.156869	0.309163	-0.257417	0	-0.143638	-0.147815	0	0.170454	-0.140677	0.16061	0	0	0	0	-0.191673	0.141697	-0.192515	0.264764	0	0.187915	0.280089	0.20873	0	-0.409163	0	0	0.14161	1	0	0.349765	0	0.316518	0.384918	0.185508	0.175267	0.257548	-0.240846	0.292427	0.389218
Amygdala.cortex.L	0	-0.149337	-0.224977	-0.134789	0	0	0	0	0.366408	0.242198	0.25388	0	0	0	0	0.386428	0	0	-0.169654	0.147703	0.17902	-0.387783	-0.663438	0.52066	0.130499	0	0.279625	0.205793	0.278055	0	0.335216	0.133514	0	0.327641	0	0.275625	0.389024	0	1	0	0	0	0	0	0	-0.147979	0	0.345432	0
Amygdala.cortex.R	0.136179	-0.184768	0	0	0	-0.215807	0	0	0	0	0	0.178163	-0.368433	0	0.139638	-0.327646	-0.136096	-0.21492	0	-0.14444	0	0	0.161529	-0.251875	0	0	0	0.354502	0	0	0.295218	0.243386	0.28919	-0.307682	0.200163	-0.25687	0.245496	0.349765	0	1	0.229262	0	0.21075	0.175737	0	0.194421	0.143731	0	0.326674
Caudoputamen.L	0	-0.152409	0.160669	0	0.13271	0	0	0.316365	0.142708	0	0.256366	0.4821	-0.319367	-0.325081	0	-0.359718	-0.424139	-0.216208	0	-0.242597	0	0	0	-0.412365	-0.206727	-0.226373	0	0	-0.262418	0	0.4019	0.359544	0	-0.15375	0	-0.312253	0	0	0	0.229262	1	0.56084	0.546876	0.481956	0.4834	0.412106	0.18253	0.277298	0.447347
Caudoputamen.R	0	0.245086	0.157267	0	0.410616	0.275262	0	0.329593	0	0.149393	0	0.517469	-0.508197	-0.569091	-0.182073	-0.306937	-0.302549	0	0	0	0.145433	0	0	-0.169452	-0.409932	-0.357038	0	0	0	0	0.314584	0.477411	0	-0.245434	0	0	0	0.316518	0	0	0.56084	1	0.439968	0.326072	0.433876	0.362082	0	0.34587	0.521308
Accumbens.L	0	0	0.240107	0.216871	0.219987	0.137251	0.424399	0.536992	0	0	0.165161	0.418001	-0.471857	-0.408621	-0.271006	-0.370527	-0.385444	0	0	-0.211632	0	-0.190038	-0.147505	-0.276871	-0.407977	-0.253049	-0.177854	0	-0.261592	0	0.481586	0.457431	0	-0.260026	0	0	0	0.384918	0	0.21075	0.546876	0.439968	1	0.640065	0.660802	0.575042	-0.268942	0.130827	0.510233
Accumbens.R	0	-0.146669	0	0.135592	0.259166	0	0.371273	0.509222	0.160062	0	0.242278	0.367164	-0.214304	-0.132938	0	-0.149937	-0.195781	0	0	-0.357236	-0.178396	-0.162143	0	-0.285424	-0.198277	-0.31132	0	0	-0.181804	0	0.308437	0.566869	-0.149151	0	0.314514	0	0.170757	0.185508	0	0.175737	0.481956	0.326072	0.640065	1	0.414602	0.517521	0	0	0.579102
Lateral.septal.complex.L	0	0	0	0.134	0.291795	0.224819	0.34203	0.218021	0.21978	0	0.201878	0.495413	-0.337568	-0.447128	0	-0.248885	-0.285618	-0.22792	0.167073	-0.208651	0	0	0	-0.312972	-0.285452	-0.237323	0	0	-0.259403	-0.203041	0.321819	0.259578	0	-0.40686	0	-0.285843	0	0.175267	0	0	0.4834	0.433876	0.660802	0.414602	1	0.635238	-0.183961	0.163612	0.31111
Lateral.septal.complex.R	0.178619	0	0	0.202255	0.300746	0	0.306378	0.46608	0.343946	0	0.207794	0.393814	-0.251365	-0.240979	0	-0.154053	-0.370048	0	0.234932	0	0	0	0	-0.192662	-0.298207	-0.282844	-0.287506	0.210092	-0.421228	0	0.38932	0.259823	0	-0.384741	0	-0.263912	0	0.257548	-0.147979	0.194421	0.412106	0.362082	0.575042	0.517521	0.635238	1	-0.20397	0.143653	0.460266
Pallidium.dorsal.L	-0.169208	0	-0.228043	0	0	-0.163088	-0.174443	-0.211561	0	-0.174916	0.150441	0	0	0	0	0	0	-0.219366	0.197564	-0.389162	-0.29769	0	0.405856	-0.438622	0.200757	-0.150268	0	0	-0.146067	0	0	0	0	0.137231	0.411392	-0.373974	0.237066	-0.240846	0	0.143731	0.18253	0	-0.268942	0	-0.183961	-0.20397	1	0	0.195881
Pallidium.dorsal.R	0	0	0	-0.174709	0	0	-0.206156	0	0.329184	0.169553	0.226002	0.265611	0	-0.280608	-0.306578	0	-0.24184	0	0.161383	0.150593	0.498264	-0.229347	-0.371109	0.285433	-0.204974	0	-0.23691	0	0	-0.149783	0.216584	0	-0.179407	0	-0.320919	0	0	0.292427	0.345432	0	0.277298	0.34587	0.130827	0	0.163612	0.143653	0	1	0.194552
Pallidium.ventral.L	0	0	0	0	0.130127	0	0	0.400769	0	0	0.366148	0.567889	-0.516044	-0.202391	-0.139048	-0.313732	-0.260249	-0.21146	0	-0.265947	0	0	0	-0.308219	-0.309884	-0.341115	0	0	-0.179523	0	0.34442	0.56734	0	-0.305039	0	-0.227931	0.436338	0.389218	0	0.326674	0.447347	0.521308	0.510233	0.579102	0.31111	0.460266	0.195881	0.194552	1
Pallidium.ventral.R	-0.199036	0	0	0	0.179057	0	0.153617	0.296839	0.264341	0.144192	0.226287	0.304992	-0.241062	-0.284907	-0.250755	0	-0.290141	0	0	-0.183383	0	-0.201412	-0.352498	0	-0.286493	0	0	0	-0.147547	0	0.42527	0.491873	-0.276673	0	0	0	0.21912	0.467899	0.394617	0	0.359546	0.438644	0.531706	0.580764	0.343009	0.279738	0	0.409899	0.444644
Pallidium.medial.L	0	0	0.219589	0.16256	0.136681	0	0.211944	0.400204	0	0	0.314023	0.509572	-0.452754	-0.246264	-0.167112	-0.415513	-0.327523	-0.366567	0	-0.303285	0	0	0	-0.437634	-0.370533	-0.423486	0	0	-0.169981	-0.172835	0.242205	0.450832	0	-0.334459	0.155315	-0.241184	0	0.256526	-0.213206	0.295546	0.518235	0.424246	0.601778	0.591577	0.567659	0.623305	0	0.131249	0.735328
Pallidium.medial.R	-0.211266	0	0	0	0.16174	0.159561	0	0.24791	0.149732	0.210145	0.325862	0.188759	-0.197006	-0.181573	0	0	-0.283679	0	0.142103	-0.137514	0	-0.270384	-0.268272	0	-0.150988	-0.17182	0	0	0	0	0.338558	0.521655	0	0	0	0	0	0.17299	0.198128	0	0.409236	0.414968	0.541847	0.63444	0.415471	0.308826	0	0.215733	0.442448
Pallidium.caudal.L	0	0.178994	0	0.186256	0.219225	0.130932	0	0.314733	0	0	0.379236	0.420191	-0.485506	-0.428542	-0.203953	-0.345993	-0.314133	-0.5004	0	-0.407235	-0.175994	-0.161706	0	-0.489511	-0.303611	-0.443994	0	0	-0.146684	-0.308973	0.382071	0.422247	0	-0.203166	0.256783	-0.218511	0.135328	0	0	0.220435	0.437339	0.511302	0.462522	0.391248	0.571608	0.38662	0.329631	0	0.663281
Pallidium.caudal.R	0	0	0	0	0.134118	0.148735	0	0.216004	0	0	0.163794	0.304556	-0.270428	-0.388257	-0.155925	0	-0.373668	0	0	-0.250351	0	-0.210025	-0.161541	-0.154624	-0.323601	-0.247643	0	0	-0.364757	0	0.174237	0.205206	-0.175178	0	0.204517	0	0	0	0	-0.180507	0.341857	0.250403	0.325786	0.403369	0.354335	0.221051	0.159319	0.236402	0.341809
Nucleus Basalis of Meynert.L	0	0	0.199789	0	-0.18126	-0.2999	0	0	-0.197012	-0.137239	0	0.488608	-0.495638	-0.146597	0	-0.492518	0	-0.156425	0.222951	-0.200442	-0.160619	0.243302	0.215509	-0.2972	-0.212644	-0.267862	-0.139526	0	-0.239101	0	0	0.239137	0.170939	-0.494431	0.138076	-0.160411	0.375488	0.242699	0	0.29948	0.261081	0.381401	0.231186	0.219577	0.287801	0.161796	0.136791	0.181064	0.577243
Nucleus Basalis of Meynert.R	-0.224313	0	0	0	-0.162649	0	0	0	0.224202	0.225896	0	0.156616	0	0	-0.39178	0	-0.1953	0	0	0	0.29527	-0.137105	-0.34925	0.274063	-0.355451	0	0	0	0	0	0.161157	0.179221	-0.282338	0.152986	-0.206642	0.197062	0.163614	0.397172	0.25071	-0.319565	0	0.200173	0.160949	0.135078	0	0	-0.174303	0.516274	0.211321
Thalamus.L	-0.261035	-0.32118	-0.445841	-0.60069	0	0	-0.155292	-0.141892	0	0	0	0	0	0	-0.17587	0	0.21317	0	-0.144359	0	0	0	-0.203878	0.156389	0	0	0	0	0.224068	0	0	-0.20524	-0.137943	0	-0.235545	-0.135556	0.374596	0.338297	0.268831	0.140294	0	0	0	-0.148309	0	-0.136071	0.142491	0.194762	0
Thalamus.R	-0.180916	-0.203678	0	-0.205022	-0.191769	0	0	0	-0.183039	0	0	0	0	0	-0.239833	0	0	0	-0.294067	0	0	-0.170811	-0.161435	0	-0.162963	0	0	0	0.219305	0	0	-0.149219	-0.149559	-0.153137	-0.14689	0	0	0.447758	0.17198	0	0	0	0.223434	0	0	0	0	0	0
Hypothalamus.L	0	-0.139633	0	-0.166278	0.265728	0	0	0.19672	0	-0.169678	0.22138	0.556766	-0.375615	-0.26987	-0.200961	-0.151516	0	-0.196747	0	-0.468746	-0.136529	0	0	-0.2037	-0.377271	-0.222557	0	0	0	0	0.177027	0.313398	-0.249414	0	0	-0.276467	0.447132	0.329463	0.194345	0.229945	0.267598	0.401823	0.346213	0.429558	0.418312	0.211881	0.162093	0	0.585834
Hypothalamus.R	0	0	0	-0.135257	0.302617	0	0.138105	0.309477	0	0	0.291253	0.438204	-0.320247	-0.341905	-0.214189	-0.1915	-0.246925	-0.186763	0	-0.267618	0	-0.203035	0	-0.143497	-0.349723	-0.270317	0	0	0	0	0.364529	0.329715	-0.201913	0	0	-0.153081	0.339484	0.455364	0.270807	0.218079	0.447096	0.563517	0.450343	0.436782	0.422609	0.310252	0.182519	0.31266	0.631215
Midbrain.L	-0.253726	0	0	-0.252667	0	0	0	0	0	0.162803	-0.230529	0	-0.173167	0	0	-0.208583	-0.146144	0	-0.211499	-0.305355	-0.220765	-0.135842	0	-0.136065	-0.14425	0	0	0	0	0.218923	0.278187	0.250331	0	0.140853	0.219526	0.172044	0	0.234191	0	0.133837	0.326622	0.302472	0.312756	0.244621	0	0	0	0	0
Midbrain.R	-0.132792	0	0	-0.150998	0.181907	0	0	0	-0.268616	0	0	0	0	0.13278	0	-0.143155	0.161942	-0.154582	-0.160979	-0.433189	-0.292816	0.258749	0.279519	-0.232973	0	-0.249468	0	0	0	0	0	0	-0.229659	0.203581	0.204183	0	0	0	-0.168779	0	0	0	0	0.209091	0	0	0	-0.338667	0.142763
Colliculi.inferior.L	0	-0.37393	0	-0.214625	0.134428	0	0.37571	0	0.154357	0	-0.135836	0	0.20359	0	0	0.167993	0.182346	0.175892	0	0.193881	0	-0.141085	-0.251126	0.182598	0.134881	0	0	0	0	0	0	-0.196429	0	0.15156	0	0.194124	0	0	0	0	0	-0.362931	0	0	0	0.206846	-0.228355	-0.217552	-0.166092
Colliculi.inferior.R	-0.293517	-0.310033	0	0	-0.279228	-0.358031	0.176983	0	-0.218225	-0.155534	0	-0.29731	0	0.316057	0.222848	0	0.151944	0	0	-0.253029	-0.304875	0.278255	0.306239	-0.23535	0.177462	0	0	-0.219781	0	0	-0.191088	-0.201613	0	0.222441	0.175582	-0.182354	0	-0.183408	-0.301445	0.131856	0	-0.562029	0	0	-0.229039	0	0.142697	-0.492006	0
Colliculi.superior.L	0	0	-0.157137	0	0	0	0.208998	0	0	0	-0.310542	-0.333036	0.241893	0.205825	-0.214156	0	0.133366	0.25107	-0.328552	0	-0.283575	0	0.152052	0	0	0	-0.143002	0.316375	0	0.259971	0	0	0	0.227587	0	0	-0.17091	0	0	0	-0.289622	-0.197452	0	0	-0.182629	0	0	-0.304902	-0.381799
Colliculi.superior.R	0	0	0	0	0	0	0.168851	0.220554	0	0.155056	-0.353195	0	0	0.215779	-0.194655	-0.355464	0	0	-0.250598	0	0	0	0.266213	-0.183023	-0.187219	0	-0.149741	0	0	0	0	0	0.244244	-0.241164	0	0	-0.41613	0.211642	-0.397248	0	0	0	0.209038	0	0	0	-0.256929	-0.247654	0
MB.Reticular.nucleus.L	-0.348003	-0.160756	0	-0.16467	0	0	0	0	0.25746	0	0	0	0	0	0	0	0	0	0	-0.29048	0	-0.155907	0	0	0	0	0	0	0	0.193576	0.303955	0.274055	0	0.261574	0	0	0	0.210493	0.266394	0	0.308171	0.157975	0.234219	0.378479	0	0	0	0.146909	0
MB.Reticular.nucleus.R	0	0	0	-0.207249	0.264086	0	0.172852	0	-0.154745	0	-0.200039	0	0	0.155931	0	0	0	0.156852	-0.156404	-0.171165	0	0	0.208302	0	-0.244898	-0.134971	0	0	0	0	-0.130467	-0.13125	0	0.135483	0	0.198503	-0.189629	0	-0.224147	-0.242139	-0.181444	0	0	0	0	0	-0.176109	-0.340574	-0.14412
Ventral.tegemental.area.L	-0.148226	-0.195432	0	-0.150594	0.222229	0	0.131599	0.210208	0.245734	0	0.224095	0	-0.144402	-0.16538	0	0	-0.208075	0	0	-0.150742	0.133032	-0.35374	-0.233758	0.142449	0	0	0	0	0	0.214474	0.355295	0	0	0.130396	-0.150848	0	0	0.299769	0.308894	0.224756	0.290342	0.20876	0.315245	0.261081	0.246489	0	0	0.21856	0.20907
Ventral.tegmental.area.R	0	0	0	0	0.202613	0	0	0	0	-0.136819	0	0	-0.178106	-0.240464	0	-0.220267	0	-0.141223	0	-0.409832	0	0	0	0	-0.186942	-0.136378	-0.256481	0	0	0	0.204254	0.159804	0	0.311259	0	0	0.27666	0	0.29158	0.341339	0	0.231562	0	0	0	0	0.266356	0.20945	0.245225
Periaqueductal.grey.L	0	0	0	-0.366246	0	-0.143744	0	0	-0.162328	-0.146513	-0.262985	-0.315939	0	0.131436	-0.202089	-0.175625	0	0.131784	-0.138665	0	0	0	0	0	-0.153344	-0.155747	-0.209422	-0.157845	0	0.180627	-0.255842	-0.22386	0	0.201479	-0.170709	0.19276	0	0	-0.135356	-0.145707	-0.402342	0	-0.191957	-0.191322	-0.296535	-0.301525	0	-0.163822	-0.215652
Periaqueductal.grey.R	0	0	-0.150825	-0.19829	0	0	0	0.169576	-0.256725	-0.188966	-0.162756	-0.210973	0	0	-0.155423	-0.30632	0	0	0	-0.230192	-0.216351	0	0.299606	-0.167251	-0.266918	-0.332787	-0.329104	0	-0.131459	0.168408	-0.229375	0	0.245316	0	0	0	-0.203861	0	-0.350773	0	-0.21694	0	0	0	-0.213329	0	0	-0.220891	0
Hindbrain.L	0	0.17655	-0.37743	-0.189582	-0.279531	0	-0.278929	-0.233992	-0.178808	-0.245512	0	-0.36043	0.156002	0	-0.146548	0.166124	0	0	0	0	0	0	-0.163344	0.275626	0.243473	0	0	-0.15826	0	-0.168158	-0.12982	-0.401269	0	0	-0.260434	0	0	-0.275254	0.168677	-0.386395	-0.356555	-0.266207	-0.436802	-0.554728	-0.380951	-0.436705	0	0.206237	-0.318873
Hindbrain.R	0	0	0	0	-0.276236	0	0	-0.198099	-0.143376	-0.224835	0	-0.199286	0.129784	0.191133	0	0	0	0	0	0	0	0	0.298326	0	0.185402	0	0	0	0	-0.192635	-0.223486	-0.361438	0.132408	-0.301738	0	-0.234096	0	0	-0.334643	0	-0.383468	-0.420861	-0.356775	-0.474108	-0.13591	0	0	0	-0.205152
Parabrachial.nucleus.L	-0.15677	-0.191728	0.337655	0	0	-0.336665	0.143756	-0.171691	0	0	0	-0.159675	0	0.178281	0	0.140995	0	0.204175	0	0	0	0	0	0	0	0.322789	-0.157515	-0.175031	0	0.213632	0	0	0	0.258656	0	0.217546	0	0	0	0	0	0	0	-0.167539	-0.185362	-0.183299	0	-0.162365	0
Parabrachial.nucleus.R	0	0	0	0	0	-0.130273	0.17308	0	-0.336578	-0.308833	0	-0.206274	0	0	0.135582	-0.15747	0	-0.155561	0	-0.365061	-0.218147	0	0.388756	-0.362435	0	-0.231531	0	0	0	0	-0.227298	-0.259269	0	0.205487	0.228297	0	0	-0.409064	-0.300455	0	0	-0.192316	0	0	0	-0.131997	0.257842	-0.483451	-0.136461
[truncated: 27 more columns]
