# Supplementary material for: The amygdala instructs insular feedback for affective learning
Source: eLife. 2020 Nov 20;9:e60336. doi: 10.7554/eLife.60336 (PMC7679142; doi:10.7554/eLife.60336)
Supplement: Figure 1—source data 1. [file elife-60336-fig1-data1.xlsx]

## Sheet: Panel C
Panel C i
aIC
Habituation	0.55	0.45	0.4	0.666667	0.722222	0.6	0.5	0.55	0.666667	0.444444	0.3	0.6	0.6	0.555556	0.555556	0.5	0.75	0.65	0.5	0.555556	0.6	0.5	0.6	0.611111	0.611111	0.45	0.6	0.65	0.722222	0.666667	0.6	0.45	0.5	0.777778	0.833333	0.55	0.5	0.45	0.5	0.388889	0.25	0.65	0.45	0.388889	0.5	0.65	0.5	0.45	0.555556
Cearly	0.53125	0.578125	0.5	0.578125	0.578125	0.46875	0.421875	0.390625	0.5625	0.5	0.625	0.578125	0.53125	0.5	0.546875	0.546875	0.453125	0.515625	0.53125	0.5625	0.5625	0.5625	0.5625	0.515625	0.53125	0.359375	0.53125	0.53125	0.421875	0.484375	0.53125	0.484375	0.546875	0.65625	0.515625	0.484375	0.46875	0.546875	0.515625	0.5625	0.609375	0.734375	0.6875	0.5	0.515625	0.5	0.515625	0.546875	0.453125
Clate	0.534483	0.551724	0.534483	0.637931	0.839286	0.448276	0.517241	0.637931	0.551724	0.642857	0.517241	0.672414	0.586207	0.603448	0.660714	0.603448	0.5	0.603448	0.517241	0.535714	0.637931	0.568966	0.637931	0.655172	0.642857	0.413793	0.5	0.603448	0.568966	0.553571	0.534483	0.534483	0.517241	0.551724	0.607143	0.551724	0.603448	0.448276	0.62069	0.642857	0.655172	0.568966	0.551724	0.637931	0.553571	0.586207	0.431034	0.551724	0.586207
Recall	0.714286	0.571429	0.5	0.833333	0.416667	0.642857	0.5	0.583333	0.75	0.75	0.428571	0.571429	0.5	0.5	0.5	0.5	0.428571	0.75	0.75	0.5	0.571429	0.571429	0.666667	0.833333	0.75	0.5	0.5	0.666667	0.416667	0.416667	0.285714	0.571429	0.583333	0.5	0.166667	0.571429	0.5	0.333333	0.75	0.5	0.5	0.5	0.666667	0.666667	0.5	0.642857	0.5	0.583333	0.583333
pIC
Habituation	0.5	0.714286	0.583333	0.583333	0.416667	0.285714	0.428571	0.583333	0.666667	0.333333	0.714286	0.5	0.583333	0.5	0.333333	0.571429	0.642857	0.583333	0.5	0.583333	0.5	0.357143	0.5	0.5	0.416667	0.642857	0.357143	0.416667	0.75	0.75	0.5	0.5	0.583333	0.5	0.75	0.714286	0.642857	0.666667	0.583333	0.833333	0.571429	0.714286	0.5	0.5	0.666667	0.428571	0.428571	0.666667	0.75
Cearly	0.484375	0.609375	0.578125	0.59375	0.578125	0.53125	0.59375	0.578125	0.53125	0.578125	0.421875	0.53125	0.453125	0.53125	0.515625	0.484375	0.59375	0.578125	0.546875	0.609375	0.53125	0.484375	0.484375	0.59375	0.6875	0.53125	0.53125	0.40625	0.453125	0.53125	0.5	0.59375	0.640625	0.53125	0.5625	0.515625	0.625	0.5	0.59375	0.671875	0.484375	0.53125	0.609375	0.484375	0.5625	0.515625	0.671875	0.515625	0.5
Clate	0.673077	0.576923	0.5	0.6	0.6	0.576923	0.673077	0.596154	0.5	0.58	0.615385	0.442308	0.480769	0.5	0.44	0.480769	0.615385	0.538462	0.56	0.4	0.423077	0.557692	0.5	0.68	0.48	0.519231	0.557692	0.538462	0.62	0.6	0.653846	0.576923	0.519231	0.52	0.5	0.461538	0.576923	0.557692	0.66	0.54	0.538462	0.634615	0.538462	0.56	0.56	0.576923	0.557692	0.557692	0.48
Recall	0.785714	0.571429	0.666667	0.583333	1	0.428571	0.428571	0.666667	0.583333	0.75	0.5	0.571429	0.416667	0.583333	0.583333	0.285714	0.5	0.166667	0.666667	0.583333	0.714286	0.642857	0.583333	0.833333	0.833333	0.428571	0.571429	0.583333	0.416667	0.25	0.642857	0.5	0.583333	0.666667	0.5	0.571429	0.5	0.5	0.666667	0.583333	0.5	0.785714	0.75	0.75	0.583333	0.357143	0.5	0.583333	0.416667
aIC - shuffled
Habituation	0.4	0.55	0.4	0.444444	0.833333	0.55	0.5	0.55	0.5	0.611111	0.4	0.35	0.55	0.555556	0.555556	0.5	0.4	0.4	0.388889	0.444444	0.7	0.5	0.55	0.611111	0.777778	0.5	0.45	0.7	0.666667	0.611111	0.45	0.6	0.65	0.611111	0.611111	0.45	0.55	0.45	0.555556	0.666667	0.35	0.35	0.6	0.444444	0.444444	0.45	0.6	0.45	0.5
Cearly	0.484375	0.5	0.421875	0.484375	0.515625	0.453125	0.46875	0.578125	0.421875	0.5625	0.421875	0.515625	0.5	0.421875	0.5	0.53125	0.421875	0.40625	0.40625	0.5625	0.53125	0.46875	0.515625	0.5625	0.46875	0.453125	0.671875	0.40625	0.453125	0.453125	0.515625	0.515625	0.453125	0.546875	0.515625	0.40625	0.375	0.296875	0.421875	0.453125	0.484375	0.359375	0.5	0.453125	0.46875	0.515625	0.40625	0.390625	0.453125
Clate	0.586207	0.482759	0.655172	0.482759	0.625	0.413793	0.637931	0.5	0.448276	0.589286	0.465517	0.5	0.482759	0.534483	0.535714	0.431034	0.465517	0.568966	0.482759	0.464286	0.413793	0.517241	0.5	0.482759	0.553571	0.62069	0.482759	0.534483	0.517241	0.482143	0.517241	0.344828	0.362069	0.465517	0.535714	0.5	0.482759	0.482759	0.517241	0.571429	0.465517	0.310345	0.5	0.534483	0.607143	0.431034	0.603448	0.603448	0.482759
Recall	0.428571	0.785714	0.583333	0.666667	0.583333	0.571429	0.357143	0.25	0.583333	0.666667	0.5	0.642857	0.5	0.416667	0.583333	0.571429	0.642857	0.5	0.333333	0.583333	0.428571	0.357143	0.25	0.416667	0.5	0.5	0.5	0.416667	0.416667	0.583333	0.642857	0.714286	0.75	0.833333	0.666667	0.5	0.5	0.25	0.833333	0.416667	0.5	0.357143	0.333333	0.416667	0.75	0.428571	0.5	0.416667	0.583333
pIC - shuffled
Habituation	0.714286	0.571429	0.5	0.416667	0.666667	0.571429	0.285714	0.416667	0.583333	0.333333	0.428571	0.5	0.583333	0.666667	0.666667	0.5	0.357143	0.5	0.5	0.416667	0.714286	0.714286	0.5	0.75	0.5	0.357143	0.285714	0.416667	0.583333	0.416667	0.642857	0.5	0.333333	0.416667	0.333333	0.357143	0.714286	0.25	0.333333	0.75	0.571429	0.5	0.416667	0.583333	0.416667	0.357143	0.5	0.166667	0.5
Cearly	0.453125	0.421875	0.421875	0.46875	0.40625	0.515625	0.453125	0.515625	0.453125	0.421875	0.421875	0.46875	0.5	0.484375	0.421875	0.5	0.46875	0.515625	0.4375	0.515625	0.53125	0.421875	0.40625	0.453125	0.453125	0.5625	0.59375	0.53125	0.546875	0.453125	0.5625	0.453125	0.515625	0.53125	0.453125	0.4375	0.515625	0.4375	0.328125	0.5	0.578125	0.40625	0.421875	0.4375	0.546875	0.5	0.53125	0.453125	0.4375
Clate	0.519231	0.442308	0.480769	0.46	0.48	0.576923	0.538462	0.576923	0.5	0.5	0.403846	0.442308	0.442308	0.46	0.42	0.519231	0.576923	0.576923	0.46	0.48	0.461538	0.576923	0.634615	0.42	0.48	0.461538	0.442308	0.423077	0.46	0.5	0.538462	0.442308	0.442308	0.44	0.54	0.5	0.5	0.5	0.4	0.5	0.5	0.365385	0.384615	0.5	0.48	0.461538	0.519231	0.442308	0.48
Recall	0.571429	0.571429	0.75	0.666667	0.416667	0.428571	0.214286	0.416667	0.5	0.333333	0.642857	0.5	0.333333	0.75	0.583333	0.428571	0.357143	0.583333	0.333333	0.583333	0.428571	0.5	0.75	0.333333	0.5	0.214286	0.285714	0.333333	0.416667	0.5	0.428571	0.571429	0.333333	0.5	0.416667	0.571429	0.428571	0.416667	0.416667	0.5	0.357143	0.642857	0.583333	0.666667	0.666667	0.571429	0.428571	0.666667	0.583333
Panel C ii
aIC
Habituation	0.541667	0.541667	0.552083	0.541667	0.541667	0.53125	0.541667	0.5625	0.572917	0.53125	0.541667	0.520833	0.53125	0.53125	0.541667	0.53125	0.53125	0.53125	0.510417	0.552083	0.520833	0.510417	0.541667	0.520833	0.552083	0.53125	0.552083	0.510417	0.520833	0.53125	0.520833	0.520833	0.53125	0.5	0.510417	0.541667	0.520833	0.552083	0.510417	0.520833	0.541667	0.53125	0.53125	0.53125	0.53125	0.489583	0.510417	0.552083	0.5
Recall	0.375	0.421875	0.46875	0.46875	0.421875	0.4375	0.390625	0.421875	0.4375	0.484375	0.484375	0.40625	0.375	0.40625	0.4375	0.390625	0.46875	0.453125	0.390625	0.46875	0.453125	0.390625	0.453125	0.4375	0.421875	0.4375	0.421875	0.390625	0.40625	0.421875	0.40625	0.453125	0.453125	0.46875	0.40625	0.390625	0.390625	0.421875	0.4375	0.5	0.46875	0.421875	0.421875	0.390625	0.40625	0.4375	0.390625	0.4375	0.40625
pIC
Habituation	0.65625	0.604167	0.604167	0.625	0.625	0.625	0.625	0.645833	0.635417	0.625	0.625	0.625	0.625	0.635417	0.614583	0.635417	0.604167	0.614583	0.625	0.614583	0.614583	0.614583	0.604167	0.604167	0.614583	0.614583	0.604167	0.625	0.614583	0.635417	0.635417	0.645833	0.59375	0.625	0.614583	0.65625	0.614583	0.625	0.604167	0.635417	0.604167	0.635417	0.614583	0.583333	0.625	0.625	0.614583	0.645833	0.614583
Recall	0.546875	0.5625	0.578125	0.5625	0.515625	0.53125	0.515625	0.515625	0.578125	0.546875	0.546875	0.53125	0.5625	0.578125	0.515625	0.53125	0.546875	0.5625	0.578125	0.546875	0.53125	0.546875	0.53125	0.546875	0.5625	0.546875	0.546875	0.53125	0.515625	0.5625	0.5625	0.53125	0.53125	0.53125	0.515625	0.546875	0.515625	0.546875	0.546875	0.5625	0.453125	0.46875	0.46875	0.4375	0.453125	0.46875	0.40625	0.453125	0.40625
aIC - shuffled
Habituation	0.46875	0.46875	0.5	0.40625	0.583333	0.458333	0.458333	0.510417	0.489583	0.5625	0.572917	0.489583	0.552083	0.40625	0.46875	0.552083	0.520833	0.53125	0.458333	0.5	0.458333	0.53125	0.46875	0.479167	0.40625	0.489583	0.520833	0.458333	0.489583	0.510417	0.458333	0.458333	0.53125	0.5625	0.46875	0.5625	0.458333	0.520833	0.541667	0.572917	0.520833	0.447917	0.489583	0.5	0.510417	0.479167	0.520833	0.4375	0.53125
Recall	0.46875	0.4375	0.453125	0.453125	0.546875	0.5625	0.484375	0.46875	0.390625	0.421875	0.484375	0.5	0.46875	0.59375	0.421875	0.546875	0.5	0.484375	0.578125	0.46875	0.5625	0.53125	0.34375	0.671875	0.484375	0.390625	0.46875	0.40625	0.5625	0.515625	0.453125	0.515625	0.546875	0.46875	0.53125	0.4375	0.5	0.453125	0.40625	0.5625	0.40625	0.453125	0.59375	0.5	0.53125	0.4375	0.515625	0.46875	0.546875
pIC - shuffled
Habituation	0.5	0.510417	0.458333	0.489583	0.520833	0.458333	0.53125	0.458333	0.46875	0.479167	0.53125	0.510417	0.489583	0.520833	0.510417	0.427083	0.447917	0.447917	0.520833	0.479167	0.479167	0.53125	0.572917	0.520833	0.510417	0.583333	0.583333	0.447917	0.552083	0.489583	0.541667	0.458333	0.447917	0.510417	0.541667	0.479167	0.510417	0.541667	0.583333	0.572917	0.5	0.583333	0.572917	0.416667	0.541667	0.53125	0.510417	0.625	0.552083
Recall	0.484375	0.640625	0.5625	0.46875	0.46875	0.5	0.546875	0.390625	0.5625	0.5	0.5625	0.421875	0.40625	0.546875	0.4375	0.578125	0.5625	0.53125	0.515625	0.484375	0.375	0.578125	0.5625	0.484375	0.515625	0.546875	0.484375	0.375	0.421875	0.5	0.421875	0.53125	0.59375	0.375	0.53125	0.53125	0.484375	0.4375	0.421875	0.46875	0.5625	0.484375	0.546875	0.484375	0.484375	0.484375	0.46875	0.53125	0.546875
Panel C iii
aIC
Cearly	0.521875	0.521875	0.50625	0.51875	0.50625	0.51875	0.51875	0.525	0.528125	0.5125	0.54375	0.521875	0.534375	0.534375	0.540625	0.528125	0.521875	0.5125	0.53125	0.528125	0.525	0.521875	0.51875	0.534375	0.5125	0.521875	0.509375	0.5375	0.51875	0.534375	0.525	0.534375	0.528125	0.515625	0.521875	0.525	0.534375	0.525	0.53125	0.51875	0.496875	0.465625	0.4875	0.478125	0.48125	0.4875	0.49375	0.4875	0.5
Clate	0.4875	0.5125	0.503125	0.496875	0.471875	0.49375	0.509375	0.5125	0.49375	0.478125	0.50625	0.5	0.50625	0.528125	0.484375	0.515625	0.50625	0.509375	0.503125	0.5125	0.484375	0.503125	0.528125	0.490625	0.503125	0.5125	0.515625	0.49375	0.496875	0.5125	0.509375	0.509375	0.5	0.5125	0.509375	0.50625	0.509375	0.51875	0.515625	0.4875	0.5625	0.559375	0.571875	0.575	0.58125	0.565625	0.578125	0.56875	0.571875
pIC
Cearly	0.5125	0.50625	0.51875	0.515625	0.503125	0.496875	0.50625	0.496875	0.4875	0.503125	0.503125	0.51875	0.515625	0.509375	0.49375	0.5	0.5125	0.503125	0.503125	0.525	0.509375	0.50625	0.496875	0.50625	0.503125	0.509375	0.496875	0.49375	0.49375	0.5	0.503125	0.490625	0.5125	0.51875	0.515625	0.490625	0.49375	0.515625	0.5125	0.5125	0.49375	0.509375	0.509375	0.503125	0.490625	0.496875	0.496875	0.484375	0.503125
Clate	0.5375	0.51875	0.53125	0.534375	0.54375	0.534375	0.525	0.546875	0.534375	0.5375	0.534375	0.54375	0.54375	0.5375	0.525	0.521875	0.528125	0.55625	0.534375	0.53125	0.55	0.53125	0.540625	0.525	0.546875	0.54375	0.5375	0.540625	0.528125	0.534375	0.521875	0.54375	0.540625	0.546875	0.540625	0.525	0.5375	0.525	0.528125	0.5375	0.50625	0.503125	0.490625	0.5	0.484375	0.490625	0.490625	0.5	0.4875
aIC - shuffled
Cearly	0.525	0.55625	0.43125	0.503125	0.525	0.490625	0.496875	0.515625	0.4875	0.46875	0.51875	0.4625	0.48125	0.51875	0.546875	0.559375	0.51875	0.5125	0.53125	0.51875	0.54375	0.4875	0.521875	0.503125	0.48125	0.49375	0.478125	0.49375	0.509375	0.475	0.515625	0.5	0.421875	0.521875	0.5	0.546875	0.521875	0.525	0.475	0.528125	0.45	0.51875	0.50625	0.484375	0.534375	0.5125	0.4875	0.528125	0.45625
Clate	0.478125	0.484375	0.515625	0.55	0.50625	0.521875	0.503125	0.496875	0.478125	0.496875	0.5	0.5	0.53125	0.48125	0.471875	0.49375	0.525	0.465625	0.48125	0.546875	0.50625	0.50625	0.496875	0.459375	0.50625	0.49375	0.521875	0.475	0.509375	0.525	0.534375	0.48125	0.540625	0.478125	0.475	0.478125	0.475	0.478125	0.509375	0.49375	0.53125	0.453125	0.5	0.453125	0.453125	0.5	0.5	0.46875	0.4875
pIC - shuffled
Cearly	0.509375	0.484375	0.503125	0.475	0.465625	0.5	0.490625	0.48125	0.525	0.534375	0.503125	0.534375	0.471875	0.509375	0.503125	0.4625	0.525	0.496875	0.490625	0.540625	0.5	0.415625	0.515625	0.51875	0.509375	0.55625	0.496875	0.5	0.509375	0.4875	0.44375	0.525	0.409375	0.5875	0.475	0.475	0.5	0.54375	0.490625	0.475	0.540625	0.496875	0.465625	0.525	0.459375	0.53125	0.50625	0.55	0.521875
Clate	0.475	0.4875	0.515625	0.521875	0.50625	0.496875	0.534375	0.484375	0.51875	0.515625	0.471875	0.440625	0.578125	0.521875	0.453125	0.521875	0.528125	0.53125	0.471875	0.521875	0.546875	0.534375	0.496875	0.50625	0.528125	0.50625	0.5375	0.5	0.50625	0.53125	0.4625	0.484375	0.565625	0.4875	0.465625	0.5375	0.5	0.553125	0.49375	0.50625	0.4875	0.484375	0.51875	0.4875	0.45	0.546875	0.5125	0.4625	0.465625
[truncated: 751 more columns]

## Sheet: Panel D
Panel D i
SST
Habituation	0.5	0.5	0.583333	0.416667	0.416667	0.428571	0.214286	0.333333	0.333333	0.416667	0.642857	0.357143	0.583333	0.583333	0.5	0.571429	0.428571	0.416667	0.416667	0.416667	0.285714	0.5	0.583333	0.416667	0.5	0.5	0.428571	0.416667	0.333333	0.416667	0.571429	0.428571	0.416667	0.583333	0.5	0.428571	0.357143	0.5	0.416667	0.5	0.5	0.357143	0.416667	0.583333	0.5	0.5	0.571429	0.333333	0.5
Cearly	0.45	0.421053	0.5	0.552632	0.552632	0.475	0.578947	0.5	0.526316	0.552632	0.475	0.342105	0.526316	0.473684	0.421053	0.55	0.473684	0.394737	0.526316	0.447368	0.5	0.473684	0.473684	0.578947	0.552632	0.45	0.526316	0.473684	0.552632	0.5	0.475	0.552632	0.526316	0.526316	0.552632	0.625	0.473684	0.605263	0.473684	0.447368	0.425	0.526316	0.526316	0.473684	0.421053	0.425	0.5	0.578947	0.5
Clate	0.625	0.578947	0.578947	0.447368	0.605263	0.425	0.526316	0.631579	0.368421	0.578947	0.35	0.526316	0.631579	0.342105	0.421053	0.55	0.578947	0.526316	0.578947	0.526316	0.5	0.473684	0.552632	0.473684	0.578947	0.525	0.578947	0.473684	0.342105	0.552632	0.55	0.605263	0.552632	0.421053	0.605263	0.6	0.684211	0.631579	0.473684	0.526316	0.4	0.526316	0.552632	0.447368	0.526316	0.5	0.578947	0.605263	0.578947
Recall	0.642857	0.714286	0.75	0.416667	0.5	0.571429	0.5	0.666667	0.5	0.666667	0.642857	0.571429	0.75	0.416667	0.583333	0.571429	0.642857	0.583333	0.5	0.5	0.642857	0.571429	0.75	0.583333	0.583333	0.642857	0.642857	0.75	0.416667	0.5	0.714286	0.785714	0.833333	0.5	0.75	0.571429	0.571429	0.75	0.416667	0.5	0.571429	0.571429	0.75	0.583333	0.583333	0.571429	0.785714	0.416667	0.583333
PKCd
Habituation	0.6	0.7	0.4	0.4	0.625	0.5	0.5	0.6	0.3	0.625	0.3	0.5	0.4	0.3	0.75	0.4	0.4	0.3	0.2	0.625	0.4	0.7	0.4	0.4	0.625	0.4	0.7	0.3	0.3	0.625	0.4	0.6	0.4	0.3	0.875	0.6	0.3	0.4	0.5	0.75	0.4	0.5	0.3	0.1	0.625	0.5	0.5	0.4	0.4
Cearly	0.45	0.5	0.473684	0.394737	0.552632	0.575	0.578947	0.526316	0.552632	0.578947	0.55	0.578947	0.631579	0.473684	0.657895	0.375	0.526316	0.368421	0.394737	0.5	0.575	0.710526	0.578947	0.526316	0.552632	0.55	0.578947	0.526316	0.473684	0.631579	0.475	0.394737	0.394737	0.447368	0.552632	0.5	0.552632	0.5	0.447368	0.552632	0.625	0.5	0.5	0.5	0.552632	0.475	0.552632	0.526316	0.447368
Clate	0.475	0.552632	0.578947	0.473684	0.473684	0.525	0.526316	0.5	0.394737	0.5	0.675	0.578947	0.657895	0.578947	0.552632	0.55	0.526316	0.605263	0.578947	0.526316	0.4	0.473684	0.5	0.473684	0.394737	0.475	0.631579	0.526316	0.473684	0.473684	0.475	0.447368	0.552632	0.552632	0.605263	0.425	0.421053	0.578947	0.552632	0.394737	0.45	0.526316	0.552632	0.394737	0.473684	0.45	0.526316	0.421053	0.526316
Recall	0.642857	0.428571	0.666667	0.666667	0.583333	0.571429	0.5	0.333333	0.416667	0.416667	0.428571	0.642857	0.75	0.75	0.5	0.357143	0.428571	0.583333	0.666667	0.5	0.714286	0.571429	0.583333	0.75	0.416667	0.571429	0.785714	0.5	0.583333	0.666667	0.785714	0.5	0.5	0.583333	0.583333	0.285714	0.428571	0.5	0.583333	0.25	0.214286	0.428571	0.166667	0.416667	0.583333	0.142857	0.357143	0.5	0.5
CEm
Habituation	0.5	0.5	0.8	0.7	0.875	0.5	0.7	0.8	0.5	0.875	0.5	0.7	0.7	0.5	0.875	0.6	0.5	0.6	0.4	0.75	0.5	0.6	0.7	0.5	0.5	0.6	0.7	0.7	0.5	0.875	0.5	0.7	0.8	0.5	0.875	0.7	0.6	0.8	0.5	0.75	0.4	0.7	0.8	0.5	0.875	0.5	0.7	0.7	0.5
Cearly	0.525	0.526316	0.526316	0.526316	0.578947	0.525	0.473684	0.473684	0.473684	0.473684	0.525	0.5	0.5	0.473684	0.473684	0.575	0.605263	0.578947	0.526316	0.552632	0.5	0.421053	0.5	0.5	0.473684	0.45	0.447368	0.5	0.473684	0.5	0.525	0.447368	0.394737	0.447368	0.526316	0.575	0.552632	0.552632	0.552632	0.578947	0.525	0.421053	0.552632	0.526316	0.5	0.575	0.526316	0.552632	0.5
Clate	0.475	0.578947	0.657895	0.605263	0.526316	0.5	0.5	0.447368	0.447368	0.5	0.475	0.5	0.552632	0.526316	0.578947	0.575	0.473684	0.710526	0.578947	0.578947	0.55	0.5	0.447368	0.5	0.473684	0.575	0.657895	0.552632	0.552632	0.552632	0.45	0.526316	0.447368	0.421053	0.421053	0.625	0.447368	0.552632	0.526316	0.578947	0.475	0.578947	0.5	0.5	0.526316	0.55	0.552632	0.578947	0.526316
Recall	0.357143	0.5	0.666667	0.5	0.5	0.642857	0.428571	0.666667	0.25	0.5	0.428571	0.571429	0.5	0.75	0.583333	0.428571	0.571429	0.583333	0.5	0.416667	0.428571	0.5	0.583333	0.5	0.5	0.857143	0.571429	0.75	0.666667	0.416667	0.642857	0.642857	0.333333	0.583333	0.5	0.357143	0.571429	0.583333	0.333333	0.583333	0.571429	0.5	0.583333	0.583333	0.5	0.571429	0.642857	0.583333	0.666667
SST - shuffled
Habituation	0.5	0.571429	0.333333	0.25	0.5	0.714286	0.571429	0.666667	0.333333	0.5	0.428571	0.357143	0.416667	0.5	0.416667	0.642857	0.571429	0.666667	0.583333	0.666667	0.571429	0.428571	0.5	0.5	0.333333	0.5	0.571429	0.5	0.5	0.333333	0.5	0.357143	0.416667	0.5	0.166667	0.714286	0.642857	0.5	0.583333	0.583333	0.357143	0.5	0.583333	0.5	0.25	0.571429	0.642857	0.333333	0.416667
Cearly	0.475	0.473684	0.447368	0.315789	0.605263	0.425	0.421053	0.605263	0.447368	0.473684	0.55	0.657895	0.5	0.552632	0.5	0.475	0.605263	0.657895	0.473684	0.5	0.525	0.447368	0.473684	0.342105	0.447368	0.525	0.552632	0.473684	0.394737	0.447368	0.575	0.552632	0.5	0.394737	0.605263	0.45	0.526316	0.447368	0.5	0.631579	0.45	0.552632	0.631579	0.526316	0.526316	0.7	0.578947	0.447368	0.5
Clate	0.425	0.552632	0.526316	0.605263	0.5	0.475	0.421053	0.526316	0.5	0.473684	0.6	0.631579	0.657895	0.421053	0.578947	0.5	0.447368	0.421053	0.473684	0.473684	0.45	0.394737	0.473684	0.421053	0.526316	0.625	0.631579	0.578947	0.473684	0.473684	0.5	0.526316	0.605263	0.526316	0.552632	0.4	0.421053	0.605263	0.447368	0.5	0.375	0.473684	0.578947	0.526316	0.578947	0.625	0.578947	0.526316	0.631579
Recall	0.214286	0.571429	0.333333	0.416667	0.583333	0.571429	0.642857	0.666667	0.666667	0.583333	0.428571	0.428571	0.25	0.583333	0.5	0.357143	0.571429	0.25	0.583333	0.583333	0.642857	0.571429	0.833333	0.833333	0.416667	0.571429	0.642857	0.416667	0.416667	0.416667	0.214286	0.571429	0.583333	0.333333	0.583333	0.5	0.5	0.416667	0.166667	0.25	0.5	0.642857	0.333333	0.416667	0.5	0.357143	0.357143	0.666667	0.583333
PKCd - shuffled
Habituation	0.5	0.6	0.4	0.5	0.125	0.4	0.4	0.6	0.6	0.5	0.4	0.5	0.5	0.6	0.25	0.5	0.5	0.5	0.6	0.5	0.5	0.5	0.5	0.5	0.75	0.4	0.3	0.5	0.4	0.5	0.5	0.6	0.7	0.7	0.375	0.8	0.7	0.4	0.5	0.625	0.5	0.4	0.4	0.5	0.375	0.2	0.4	0.4	0.6
Cearly	0.3	0.526316	0.5	0.526316	0.526316	0.575	0.578947	0.394737	0.473684	0.473684	0.425	0.5	0.368421	0.315789	0.421053	0.625	0.552632	0.552632	0.605263	0.526316	0.525	0.710526	0.421053	0.447368	0.552632	0.525	0.526316	0.526316	0.526316	0.526316	0.525	0.447368	0.263158	0.473684	0.421053	0.475	0.578947	0.5	0.473684	0.394737	0.45	0.394737	0.368421	0.5	0.421053	0.5	0.447368	0.473684	0.473684
Clate	0.475	0.368421	0.605263	0.526316	0.421053	0.45	0.421053	0.5	0.421053	0.394737	0.5	0.473684	0.552632	0.552632	0.526316	0.625	0.5	0.473684	0.289474	0.552632	0.55	0.447368	0.421053	0.473684	0.526316	0.6	0.5	0.526316	0.552632	0.473684	0.4	0.552632	0.473684	0.421053	0.526316	0.525	0.578947	0.447368	0.421053	0.5	0.55	0.421053	0.447368	0.447368	0.526316	0.475	0.473684	0.605263	0.421053
Recall	0.428571	0.571429	0.333333	0.5	0.333333	0.642857	0.642857	0.416667	0.666667	0.666667	0.5	0.571429	0.5	0.583333	0.416667	0.571429	0.714286	0.666667	0.75	0.666667	0.428571	0.357143	0.583333	0.583333	0.416667	0.357143	0.5	0.5	0.666667	0.5	0.571429	0.357143	0.5	0.5	0.666667	0.5	0.357143	0.666667	0.5	0.583333	0.5	0.5	0.583333	0.333333	0.666667	0.571429	0.5	0.583333	0.666667
CEm - shuffled
Habituation	0.5	0.4	0.7	0.3	0.5	0.4	0.4	0.5	0.5	0.375	0.5	0.4	0.4	0.3	0.25	0.5	0.5	0.6	0.5	0.5	0.6	0.4	0.6	0.6	0.5	0.7	0.2	0.7	0.6	0.5	0.5	0.6	0.5	0.4	0.375	0.5	0.3	0.5	0.5	0.5	0.3	0.4	0.5	0.2	0.375	0.2	0.3	0.2	0.3
Cearly	0.5	0.552632	0.421053	0.5	0.447368	0.55	0.526316	0.473684	0.447368	0.5	0.575	0.473684	0.5	0.552632	0.5	0.45	0.473684	0.394737	0.526316	0.473684	0.45	0.421053	0.552632	0.5	0.473684	0.45	0.473684	0.552632	0.473684	0.5	0.575	0.473684	0.552632	0.447368	0.526316	0.4	0.526316	0.5	0.526316	0.5	0.55	0.473684	0.526316	0.473684	0.5	0.425	0.473684	0.447368	0.5
Clate	0.45	0.526316	0.526316	0.552632	0.552632	0.4	0.421053	0.5	0.552632	0.447368	0.6	0.473684	0.552632	0.578947	0.473684	0.525	0.552632	0.5	0.473684	0.552632	0.425	0.394737	0.526316	0.447368	0.5	0.55	0.473684	0.552632	0.526316	0.5	0.475	0.5	0.5	0.5	0.578947	0.5	0.394737	0.473684	0.473684	0.473684	0.525	0.552632	0.552632	0.5	0.578947	0.475	0.526316	0.421053	0.473684
Recall	0.428571	0.5	0.416667	0.416667	0.583333	0.714286	0.5	0.583333	0.5	0.5	0.428571	0.642857	0.666667	0.25	0.416667	0.571429	0.571429	0.583333	0.416667	0.416667	0.5	0.714286	0.666667	0.5	0.666667	0.642857	0.571429	0.5	0.5	0.5	0.5	0.285714	0.5	0.333333	0.583333	0.357143	0.571429	0.666667	0.333333	0.333333	0.285714	0.357143	0.333333	0.416667	0.5	0.428571	0.428571	0.5	0.5
Panel D ii
SST
Habituation	0.53125	0.546875	0.5625	0.515625	0.53125	0.5625	0.53125	0.546875	0.53125	0.515625	0.546875	0.515625	0.546875	0.515625	0.546875	0.515625	0.515625	0.546875	0.546875	0.53125	0.546875	0.5625	0.53125	0.5625	0.546875	0.546875	0.53125	0.5625	0.546875	0.546875	0.53125	0.5625	0.546875	0.515625	0.546875	0.546875	0.5625	0.53125	0.515625	0.5625	0.5	0.53125	0.484375	0.5	0.484375	0.5	0.53125	0.515625	0.484375
Recall	0.59375	0.59375	0.59375	0.59375	0.578125	0.59375	0.65625	0.59375	0.578125	0.578125	0.609375	0.578125	0.578125	0.59375	0.59375	0.59375	0.59375	0.609375	0.59375	0.578125	0.625	0.59375	0.59375	0.609375	0.578125	0.609375	0.59375	0.609375	0.609375	0.578125	0.578125	0.59375	0.59375	0.59375	0.59375	0.578125	0.640625	0.609375	0.578125	0.609375	0.4375	0.421875	0.421875	0.421875	0.421875	0.4375	0.421875	0.4375	0.4375
PKCd
Habituation	0.53125	0.53125	0.515625	0.53125	0.515625	0.546875	0.578125	0.578125	0.5	0.53125	0.546875	0.546875	0.546875	0.515625	0.484375	0.515625	0.5625	0.53125	0.53125	0.515625	0.546875	0.5625	0.515625	0.5625	0.53125	0.53125	0.546875	0.546875	0.546875	0.5625	0.546875	0.53125	0.5625	0.546875	0.515625	0.515625	0.53125	0.5625	0.5625	0.53125	0.46875	0.46875	0.453125	0.5	0.453125	0.453125	0.4375	0.46875	0.46875
Recall	0.484375	0.453125	0.453125	0.453125	0.46875	0.453125	0.453125	0.453125	0.46875	0.46875	0.546875	0.4375	0.453125	0.421875	0.4375	0.4375	0.46875	0.4375	0.453125	0.453125	0.4375	0.421875	0.46875	0.546875	0.453125	0.453125	0.453125	0.453125	0.46875	0.46875	0.453125	0.453125	0.46875	0.46875	0.4375	0.46875	0.453125	0.453125	0.46875	0.46875	0.5	0.484375	0.515625	0.5	0.484375	0.5	0.484375	0.453125	0.46875
CEm
Habituation	0.333333	0.375	0.375	0.375	0.354167	0.416667	0.395833	0.354167	0.354167	0.333333	0.354167	0.354167	0.354167	0.375	0.354167	0.375	0.354167	0.375	0.354167	0.375	0.375	0.375	0.354167	0.354167	0.354167	0.375	0.395833	0.333333	0.354167	0.354167	0.375	0.354167	0.375	0.375	0.375	0.354167	0.395833	0.395833	0.395833	0.354167	0.625	0.625	0.666667	0.625	0.666667	0.458333	0.666667	0.4375	0.645833
Recall	0.5	0.5	0.5	0.5	0.5	0.5	0.5	0.5	0.5	0.5	0.5	0.5	0.5	0.5	0.5	0.5	0.5	0.5	0.5	0.5	0.5	0.5	0.5	0.5	0.5	0.5	0.5	0.5	0.5	0.5	0.5	0.5	0.5	0.5	0.5	0.5	0.5	0.5	0.5	0.5	0.46875	0.484375	0.46875	0.484375	0.46875	0.5	0.46875	0.5	0.484375
SST - shuffled
Habituation	0.484375	0.484375	0.65625	0.484375	0.546875	0.46875	0.609375	0.453125	0.484375	0.53125	0.453125	0.515625	0.5	0.46875	0.5	0.46875	0.515625	0.578125	0.4375	0.484375	0.453125	0.453125	0.515625	0.5625	0.5625	0.515625	0.53125	0.515625	0.4375	0.53125	0.5	0.484375	0.46875	0.59375	0.53125	0.546875	0.53125	0.546875	0.453125	0.5625	0.453125	0.5	0.4375	0.453125	0.578125	0.453125	0.46875	0.484375	0.453125
Recall	0.53125	0.4375	0.53125	0.5625	0.609375	0.5	0.546875	0.515625	0.5	0.453125	0.5625	0.578125	0.4375	0.5625	0.5625	0.578125	0.5625	0.5625	0.46875	0.546875	0.484375	0.546875	0.53125	0.4375	0.453125	0.53125	0.421875	0.4375	0.484375	0.53125	0.5	0.453125	0.5	0.546875	0.53125	0.390625	0.5	0.5	0.53125	0.5	0.53125	0.53125	0.546875	0.546875	0.53125	0.5625	0.484375	0.453125	0.484375
PKCd - shuffled
Habituation	0.515625	0.515625	0.734375	0.578125	0.46875	0.4375	0.546875	0.578125	0.390625	0.484375	0.5	0.453125	0.5	0.5	0.578125	0.5	0.5625	0.453125	0.609375	0.46875	0.484375	0.484375	0.53125	0.5	0.40625	0.578125	0.53125	0.46875	0.5	0.25	0.609375	0.484375	0.453125	0.453125	0.484375	0.46875	0.609375	0.546875	0.421875	0.578125	0.484375	0.421875	0.578125	0.53125	0.5	0.40625	0.5	0.484375	0.453125
Recall	0.4375	0.546875	0.46875	0.53125	0.484375	0.375	0.46875	0.453125	0.515625	0.515625	0.390625	0.484375	0.5	0.484375	0.5	0.40625	0.53125	0.53125	0.484375	0.609375	0.328125	0.421875	0.453125	0.46875	0.390625	0.609375	0.484375	0.515625	0.4375	0.5625	0.53125	0.609375	0.5625	0.46875	0.4375	0.421875	0.484375	0.59375	0.40625	0.5625	0.546875	0.515625	0.484375	0.5625	0.5625	0.5	0.4375	0.515625	0.390625
CEm - shuffled
Habituation	0.4375	0.375	0.416667	0.645833	0.5	0.583333	0.5	0.458333	0.4375	0.5625	0.541667	0.520833	0.541667	0.520833	0.458333	0.395833	0.479167	0.5	0.604167	0.520833	0.5	0.5625	0.520833	0.520833	0.4375	0.541667	0.604167	0.416667	0.5625	0.520833	0.583333	0.479167	0.5	0.520833	0.458333	0.5	0.541667	0.395833	0.604167	0.479167	0.520833	0.541667	0.5	0.458333	0.395833	0.520833	0.604167	0.479167	0.458333
Recall	0.5	0.5	0.5	0.5	0.5	0.5	0.5	0.5	0.5	0.5	0.5	0.5	0.5	0.5	0.5	0.5	0.5	0.5	0.5	0.5	0.5	0.5	0.5	0.5	0.5	0.5	0.5	0.5	0.5	0.5	0.5	0.5	0.5	0.5	0.5	0.5	0.5	0.5	0.5	0.5	0.4375	0.546875	0.5	0.5	0.453125	0.484375	0.546875	0.53125	0.5
Panel D iii
SST
Cearly	0.514423	0.509615	0.509615	0.514423	0.519231	0.519231	0.509615	0.514423	0.533654	0.528846	0.504808	0.514423	0.514423	0.524038	0.514423	0.519231	0.519231	0.514423	0.524038	0.533654	0.514423	0.504808	0.509615	0.528846	0.519231	0.509615	0.519231	0.519231	0.519231	0.514423	0.538462	0.509615	0.524038	0.528846	0.524038	0.519231	0.504808	0.519231	0.528846	0.504808	0.519231	0.543269	0.524038	0.519231	0.509615	0.5	0.519231	0.524038	0.514423
Clate	0.588542	0.5625	0.588542	0.598958	0.578125	0.583333	0.583333	0.572917	0.578125	0.598958	0.59375	0.567708	0.567708	0.583333	0.578125	0.5625	0.598958	0.578125	0.578125	0.578125	0.604167	0.5625	0.567708	0.583333	0.567708	0.578125	0.572917	0.583333	0.578125	0.59375	0.5625	0.588542	0.5625	0.583333	0.583333	0.578125	0.578125	0.567708	0.583333	0.572917	0.5625	0.536458	0.536458	0.541667	0.536458	0.53125	0.53125	0.552083	0.536458
PKCd
Cearly	0.523438	0.520833	0.518229	0.518229	0.523438	0.492188	0.513021	0.523438	0.515625	0.507813	0.523438	0.510417	0.520833	0.523438	0.507813	0.526042	0.518229	0.510417	0.513021	0.515625	0.510417	0.515625	0.507813	0.507813	0.515625	0.520833	0.513021	0.513021	0.520833	0.510417	0.518229	0.513021	0.5	0.520833	0.523438	0.513021	0.513021	0.510417	0.515625	0.520833	0.494792	0.510417	0.5	0.505208	0.502604	0.502604	0.505208	0.507813	0.505208
Clate	0.528646	0.541667	0.528646	0.53125	0.528646	0.544271	0.546875	0.523438	0.546875	0.533854	0.536458	0.536458	0.539063	0.536458	0.539063	0.536458	0.528646	0.552083	0.536458	0.536458	0.546875	0.53125	0.533854	0.536458	0.541667	0.539063	0.526042	0.541667	0.541667	0.539063	0.544271	0.53125	0.539063	0.528646	0.539063	0.546875	0.53125	0.53125	0.539063	0.536458	0.5	0.507813	0.502604	0.507813	0.502604	0.515625	0.497396	0.513021	0.505208
CEm
Cearly	0.480769	0.495192	0.480769	0.495192	0.480769	0.490385	0.495192	0.495192	0.480769	0.475962	0.495192	0.471154	0.490385	0.480769	0.490385	0.485577	0.485577	0.480769	0.480769	0.495192	0.485577	0.485577	0.490385	0.495192	0.490385	0.485577	0.490385	0.485577	0.485577	0.485577	0.495192	0.490385	0.485577	0.490385	0.480769	0.490385	0.490385	0.490385	0.480769	0.495192	0.509615	0.519231	0.519231	0.514423	0.524038	0.519231	0.514423	0.514423	0.528846
Clate	0.46875	0.494792	0.494792	0.463542	0.479167	0.46875	0.46875	0.479167	0.473958	0.46875	0.46875	0.479167	0.479167	0.463542	0.473958	0.473958	0.46875	0.463542	0.489583	0.479167	0.479167	0.463542	0.5	0.473958	0.473958	0.489583	0.46875	0.46875	0.484375	0.484375	0.484375	0.484375	0.46875	0.479167	0.489583	0.489583	0.463542	0.479167	0.489583	0.479167	0.489583	0.484375	0.484375	0.489583	0.484375	0.479167	0.489583	0.479167	0.489583
SST - shuffled
Cearly	0.456731	0.461538	0.509615	0.5	0.432692	0.490385	0.495192	0.490385	0.5	0.490385	0.495192	0.485577	0.514423	0.509615	0.4375	0.495192	0.485577	0.543269	0.432692	0.490385	0.442308	0.528846	0.504808	0.475962	0.475962	0.538462	0.572115	0.5	0.548077	0.524038	0.504808	0.5	0.509615	0.519231	0.514423	0.5	0.490385	0.408654	0.475962	0.4375	0.466346	0.572115	0.495192	0.567308	0.471154	0.548077	0.5	0.5	0.528846
Clate	0.494792	0.494792	0.541667	0.520833	0.546875	0.520833	0.432292	0.510417	0.494792	0.432292	0.463542	0.489583	0.46875	0.489583	0.505208	0.515625	0.5	0.5	0.53125	0.458333	0.494792	0.5	0.458333	0.4375	0.484375	0.53125	0.546875	0.46875	0.479167	0.510417	0.515625	0.510417	0.484375	0.473958	0.463542	0.557292	0.510417	0.520833	0.479167	0.515625	0.541667	0.520833	0.515625	0.515625	0.453125	0.489583	0.5	0.484375	0.541667
PKCd - shuffled
Cearly	0.520833	0.518229	0.520833	0.515625	0.505208	0.473958	0.502604	0.489583	0.486979	0.476563	0.554688	0.492188	0.486979	0.526042	0.484375	0.489583	0.507813	0.510417	0.497396	0.523438	0.507813	0.5	0.520833	0.541667	0.541667	0.471354	0.5	0.520833	0.507813	0.471354	0.518229	0.486979	0.494792	0.515625	0.489583	0.536458	0.453125	0.489583	0.489583	0.481771	0.502604	0.473958	0.489583	0.502604	0.497396	0.505208	0.523438	0.5	0.510417
Clate	0.502604	0.53125	0.502604	0.494792	0.479167	0.510417	0.5	0.523438	0.533854	0.505208	0.518229	0.536458	0.5	0.484375	0.526042	0.53125	0.466146	0.479167	0.481771	0.510417	0.492188	0.473958	0.5	0.505208	0.494792	0.486979	0.479167	0.520833	0.458333	0.528646	0.513021	0.481771	0.479167	0.526042	0.518229	0.455729	0.528646	0.523438	0.442708	0.466146	0.536458	0.520833	0.5	0.520833	0.513021	0.526042	0.445313	0.520833	0.544271
CEm - shuffled
Cearly	0.514423	0.504808	0.504808	0.5	0.475962	0.490385	0.495192	0.495192	0.519231	0.514423	0.485577	0.504808	0.485577	0.5	0.5	0.490385	0.456731	0.495192	0.538462	0.495192	0.504808	0.5	0.495192	0.514423	0.5	0.480769	0.485577	0.490385	0.480769	0.504808	0.475962	0.495192	0.461538	0.490385	0.524038	0.519231	0.490385	0.475962	0.5	0.5	0.490385	0.5	0.480769	0.5	0.538462	0.504808	0.504808	0.533654	0.447115
Clate	0.479167	0.515625	0.510417	0.5	0.505208	0.515625	0.505208	0.484375	0.484375	0.46875	0.53125	0.484375	0.515625	0.489583	0.526042	0.479167	0.463542	0.505208	0.515625	0.520833	0.520833	0.526042	0.510417	0.458333	0.526042	0.510417	0.489583	0.526042	0.479167	0.473958	0.489583	0.510417	0.520833	0.473958	0.5	0.526042	0.494792	0.5	0.489583	0.5	0.479167	0.5	0.505208	0.505208	0.505208	0.479167	0.494792	0.505208	0.5
[truncated: 751 more columns]
