# Supplementary material for: The amygdala instructs insular feedback for affective learning
Source: eLife. 2020 Nov 20;9:e60336. doi: 10.7554/eLife.60336 (PMC7679142; doi:10.7554/eLife.60336)
Supplement: Figure 2—source data 1. [file elife-60336-fig2-data1.xlsx]

## Sheet: Panel Dii
figure supplement 5Ai (raw data for Figure 2Dii)
	GFP controls									aIC-CE							pIC-CE
	Mouse 1	Mouse 2	Mouse 3	Mouse 4	Mouse 5	Mouse 6	Mouse 7	Mouse 8	Mouse 9	Mouse 1	Mouse 2	Mouse 3	Mouse 4	Mouse 5	Mouse 6	Mouse 7	Mouse 1	Mouse 2	Mouse 3	Mouse 4	Mouse 5	Mouse 6	Mouse 7	Mouse 8	Mouse 9
Session 1 (early)	-0.5	0	1.75	1	-0.25	-0.75	-1	0.25	-0.5	-0.75	-2	-1.5	0.75	0.25	-1.25	0	0	-0.5	-1.75	1.5	0.75	2.75	0	-1.25	3
Session 2 (early)	-0.75	0.5	1.75	1	1	-0.5	3	0.25	3.25	1	-0.75	1.75	-0.5	0.25	1.25	0.25	1.25	-1	0.25	-1.75	0	1.75	-1.75	0.75	3.25
Session 3	-0.75	-0.75	-0.25	-0.75	2.75	1.75	1.5	2.25	7.75	-0.25	1.25	-1.5	-2.25	1	4.25	-1	0.25	-2.5	-2.75	-1.75	3	2.5	1.25	3.5	7.5
Session 4	0	-1.75	-0.5	-0.75	-1.75	6.75	2.25	-0.75	10.5	-3	-0.25	0.25	-0.5	-0.5	1.25	-0.25	5.25	-1.5	-0.75	1.5	4.75	7.75	5	3.5	14.5
Session 5	-0.75	4	0	0.5	3.25	6.5	2	0.5	14.25	2.25	2.75	1.25	-2	1.75	8.25	-0.5	4.25	0.25	5.75	2.5	15.5	9	6.75	5.25	30.75
Session 6	-0.5	11.75	0	0	0	4	4.25	1.75	14	0.25	2.5	-0.25	0.25	-0.75	15.5	-1.5	7.25	-1.25	9	2.25	11.25	9.5	7.25	14	28.75
Session 7 (late)	2.5	2.25	0.25	1.5	4	10.25	9.25	0.25	26.25	-0.5	6	0.5	0.75	-0.25	5	0.25	6.5	3	23.75	8.25	16	12.25	11.5	10.5	19.25
Session 8 (late)	2	6.75	0.75	-0.75	8.75	16.75	8.75	-1.25	19	0.75	4.25	1.25	0	0.5	1.75	-2.25	4.75	-0.5	20	9.75	13.75	14	10.25	13	20.25
figure supplement 5Aii (raw data for Figure 2Dii)
	GFP controls									aIC-CE							pIC-CE
	Mouse 1	Mouse 2	Mouse 3	Mouse 4	Mouse 5	Mouse 6	Mouse 7	Mouse 8	Mouse 9	Mouse 1	Mouse 2	Mouse 3	Mouse 4	Mouse 5	Mouse 6	Mouse 7	Mouse 1	Mouse 2	Mouse 3	Mouse 4	Mouse 5	Mouse 6	Mouse 7	Mouse 8	Mouse 9
BL	0.4	0.666667	0.933333	7.86667	0	0.166667	0	0.5	0	0	1.8	0	1.26667	0.933333	0.066667	1.26667	0	0	0.083333	0	0	0	0	0.25	0
CS1 (early)	0	0	0	51.2	0	0	0	0	0	0	0	0	0	8	0	0	0	0	7	0	0	0	0	0	0
CS2 (early)	0	3.2	29.6	11.2	0	0	3	0	0	16	3.2	2.4	18.4	4.8	0	59.2	0	4	0	11	0	0	0	0	0
CS3	20.8	8	81.6	24.8	5	20	29	0	60	12.8	0	66.4	3.2	17.6	29.6	30.4	0	21	5	14	29	24	29	0	0
CS4 (late)	95.2	76.8	90.4	100	6	15	7	4	44	34.4	75.2	100	97.6	100	64.8	80.8	12	0	21	36	38	45	45	25	41
CS5 (late)	96.8	30.4	96.8	88	54	61	35	47	100	20	22.4	96.8	96.8	97.6	87.2	97.6	0	23	37	10	44	13	20	31	19

## Sheet: Panel Diii left
figure supplement 5Bi (raw data for Figure 2Diii left)
	GFP controls			aIC-CE			pIC-CE
	preCS	R-CS	F-CS	preCS	R-CS	F-CS	preCS	R-CS	F-CS
Mouse 1	0	0	0	0	3	0	3	3	0
Mouse 2	0.75	25.5	0	1.5	6	0	8.25	9	3
Mouse 3	3.75	9	0	1.5	1.5	0	4.5	0	3
Mouse 4	0.75	6	0	0	0	0	2.25	9	6
Mouse 5	5.25	21	3	1.5	1.5	0	0.75	9	0
Mouse 6	6.75	9	1.5	0	6	0	0.75	10.5	0
Mouse 7	1.5	10.5	0	0	1.5	0	4.5	6	0
Mouse 8	1.5	1.5	0				8.25	19.5	4.5
Mouse 9	0	0	0				1.5	18	0
figure supplement 5Bii (raw data for Figure 2Diii left)
	GFP controls			aIC-CE			pIC-CE
	BL	R-CS	F-CS	BL	R-CS	F-CS	BL	R-CS	F-CS
Mouse 1	4.58333	14	20.5	13.6	17.6	88.4	0.333333	23	60.5
Mouse 2	3.58333	48.25	73.5	5.06667	35.6	56	4.08333	6.5	54.5
Mouse 3	4.41667	43.25	61.25	2.2	26.4	76.6	0	0	1
Mouse 4	0.25	0	49.5	4.4	16.2	30.4	1.25	13.25	11
Mouse 5	40.5	47.5	60.75	1.4	5.8	73.6	1.08333	3	22.5
Mouse 6	2.8	8.2	5	6.4	50	88.6	1.75	13.5	49.5
Mouse 7	2.26667	7	50	5.8	45.2	91.8	1.75	4.75	47.5
Mouse 8	0.6	19	61.4				0.333333	8	64
Mouse 9	4.93333	42.8	9.6				0.166667	1.5	47.25

## Sheet: Panel Diii right
figure supplement 7B left (raw data for Figure 2Diii right)
	GFP controls			hM4(pIC)-CE
	preCS	R-CS	F-CS	preCS	R-CS	F-CS
Mouse 1	1.5	6	1.5	5	0	0
Mouse 2	4	16.5	0	3.5	19.5	1.5
Mouse 3	2.5	19.5	0	2	16.5	0
Mouse 4	0	3	0	0	12	0
Mouse 5	1	4.5	0	4	9	1.5
Mouse 6	4.5	24	1.5	2	34.5	0
Mouse 7	0.5	0	0	6	9	1.5
Mouse 8	2	21	0	4	27	0
Mouse 9	1	33	0
Mouse 10	4	19.5	1.5
Mouse 11	8.5	25.5	6
Mouse 12	0.5	4.5	0
figure supplement 7B right (raw data for Figure 2Diii right)
	GFP controls			hM4(pIC)-CE
	BL	R-CS	F-CS	BL	R-CS	F-CS
Mouse 1	8.75	32.625	63.625	0.833333	3.125	34.5
Mouse 2	30.6667	63.75	50.25	2.5	17.75	33.375
Mouse 3	1.5	17.25	48	18.25	65.25	47
Mouse 4	5.91667	36.75	61.875	25.1667	13.875	19.875
Mouse 5	7.91667	30.625	38.875	4.33333	9.375	36.375
Mouse 6	21.5	34.125	54.25	28.5	24.375	66.625
Mouse 7	42.0833	29.5	60.875	3.66667	8.625	53
Mouse 8	15.9167	31	71.625	5.5	34.125	43.375
Mouse 9	34.25	16.625	80.125
Mouse 10	20.6667	10.375	62.125
Mouse 11	14.9167	50.5	77.75
Mouse 12	17.5	55.375	77.5
