# Supplementary material for: The amygdala instructs insular feedback for affective learning
Source: eLife. 2020 Nov 20;9:e60336. doi: 10.7554/eLife.60336 (PMC7679142; doi:10.7554/eLife.60336)
Supplement: Figure 3—source data 1. [file elife-60336-fig3-data1.xlsx]

## Sheet: Panel B
	STA						SFC
Panel B	ii		iii				iv		v
	Habituation		Recall				Habituation		Recall
peri-spike time (ms)	preCS	CS	preCS	CS		Frequency (Hz)	preCS	CS	preCS	CS
-0.15	0.000776	0.001659	-0.00048	0.001606		3.90625	0.00266027	0.000448468	1.59196e-05	4.35682e-05
-0.149	0.000869	0.001423	-0.00037	0.001212		5.85938	0.00157974	0.000360754	1.62253e-05	5.64706e-05
-0.148	0.000715	0.001263	-0.00016	0.000934		7.8125	0.000789168	0.000301762	8.15949e-06	7.3632e-05
-0.147	0.000297	0.001128	8.59e-05	0.00077		9.76562	0.000512664	0.000352879	3.72497e-06	8.25107e-05
-0.146	-0.00033	0.000972	0.00032	0.000689		11.7188	0.000563304	0.000654657	3.35244e-05	0.000106452
-0.145	-0.00104	0.000774	0.000498	0.000645		13.6719	0.000886017	0.000795711	0.000147133	0.000123205
-0.144	-0.0017	0.000542	0.000597	0.000592		15.625	0.00162627	0.000406169	0.00024655	0.0001463
-0.143	-0.00216	0.00031	0.000615	0.000507		17.5781	0.0018196	0.000117506	0.000158902	0.000179545
-0.142	-0.00238	0.000121	0.000575	0.000387		19.5312	0.00174146	0.000243396	0.000105362	0.000289833
-0.141	-0.00235	6.39e-06	0.000504	0.000251		21.4844	0.00169111	0.000738585	0.000181094	0.000566628
-0.14	-0.00216	-2.3e-05	0.000431	0.000118		23.4375	0.00152638	0.0013791	0.000319086	0.00112215
-0.139	-0.00195	1.8e-05	0.000371	7.06e-06		25.3906	0.00133702	0.00160375	0.000415006	0.00168729
-0.138	-0.00182	9.77e-05	0.000322	-7e-05		27.3438	0.00107062	0.00143137	0.000472597	0.00244191
-0.137	-0.00185	0.000184	0.000269	-0.0001		29.2969	0.000819117	0.00123754	0.000552633	0.0033822
-0.136	-0.00202	0.000258	0.000189	-7.9e-05		31.25	0.000568432	0.00108043	0.000677631	0.00483774
-0.135	-0.00227	0.000328	6.39e-05	-1.9e-06		33.2031	0.000583177	0.000907358	0.000774052	0.00564547
-0.134	-0.0025	0.000413	-0.00012	0.000119		35.1562	0.000828749	0.000756515	0.000868563	0.00549761
-0.133	-0.00262	0.000532	-0.00034	0.000262		37.1094	0.00143921	0.000693259	0.000916	0.00497461
-0.132	-0.00255	0.000682	-0.00059	0.000397		39.0625	0.00230316	0.00075914	0.000956462	0.00444396
-0.131	-0.00226	0.000843	-0.00083	0.000496		41.0156	0.0028726	0.000875249	0.000904444	0.00374928
-0.13	-0.00174	0.000984	-0.00101	0.000543		42.9688	0.0030914	0.0012189	0.000766554	0.00334076
-0.129	-0.00106	0.001082	-0.00112	0.000537		44.9219	0.00308556	0.00164828	0.000548697	0.00260107
-0.128	-0.0003	0.001136	-0.00113	0.000491		46.875	0.00269689	0.00201064	0.000371233	0.00185173
-0.127	0.000441	0.001172	-0.00103	0.000427		48.8281	0.00181359	0.00234055	0.000277348	0.00133676
-0.126	0.00108	0.001227	-0.00084	0.00037		50.7812	0.00107427	0.0023847	0.000233983	0.000918633
-0.125	0.001562	0.001325	-0.00057	0.000342		52.7344	0.000668381	0.00222072	0.0001513	0.000615959
-0.124	0.001876	0.001456	-0.00025	0.00036		54.6875	0.000402564	0.00159625	9.40728e-05	0.000387577
-0.123	0.002037	0.001581	9.32e-05	0.000428		56.6406	0.000328548	0.0010538	0.00020901	0.000215272
-0.122	0.002082	0.001648	0.000417	0.000539		58.5938	0.000402165	0.000639782	0.000411486	0.000144429
-0.121	0.002054	0.001618	0.000701	0.000667		60.5469	0.000465575	0.000505167	0.000521841	0.000121981
-0.12	0.002004	0.001478	0.000922	0.00077		62.5	0.000407923	0.000599608	0.000515922	7.81936e-05
-0.119	0.001976	0.001238	0.001067	0.0008		64.4531	0.000301113	0.00076777	0.000427948	4.11197e-05
-0.118	0.001992	0.000926	0.001134	0.000721		66.4062	0.000165341	0.000903313	0.000316024	4.50165e-05
-0.117	0.002047	0.000574	0.001127	0.000515		68.3594	7.86229e-05	0.000727875	0.00021739	6.15481e-05
-0.116	0.0021	0.000212	0.001057	0.000201		70.3125	3.96184e-05	0.000404462	0.000143187	6.25666e-05
-0.115	0.002095	-0.00014	0.000941	-0.00018		72.2656	7.00425e-05	0.000138931	0.000139051	7.24856e-05
-0.114	0.001976	-0.00045	0.00079	-0.00055		74.2188	0.000206412	6.50807e-05	0.00019087	0.000114191
-0.113	0.001719	-0.00071	0.000613	-0.00085		76.1719	0.000492375	6.58463e-05	0.000218129	0.00016125
-0.112	0.001342	-0.00089	0.000414	-0.00103		78.125	0.000894039	6.56428e-05	0.000136039	0.000195878
-0.111	0.000902	-0.00098	0.000189	-0.00107		80.0781	0.00114737	6.63788e-05	6.21652e-05	0.000207155
-0.11	0.000472	-0.00097	-6.2e-05	-0.00097		82.0312	0.00091732	5.86977e-05	9.80977e-05	0.00020639
-0.109	0.000112	-0.00088	-0.00034	-0.00076		83.9844	0.000602627	3.0214e-05	0.000210086	0.000178699
-0.108	-0.00014	-0.00072	-0.00062	-0.0005		85.9375	0.00041648	3.43426e-06	0.000272483	0.00011903
-0.107	-0.00027	-0.00052	-0.00089	-0.00024		87.8906	0.000376893	2.58429e-05	0.000233749	5.03292e-05
-0.106	-0.00026	-0.00028	-0.0011	1.3e-06		89.8438	0.000375825	0.000104869	0.000154078	2.24917e-05
-0.105	-9.8e-05	-4.1e-05	-0.00123	0.000203		91.7969	0.000261038	0.00013976	0.000183959	2.41442e-05
-0.104	0.000246	0.000199	-0.00124	0.000379		93.75	0.000206526	4.83586e-05	0.000390834	2.99047e-05
-0.103	0.000767	0.000433	-0.00113	0.000547		95.7031	0.000338394	3.88298e-05	0.000671288	4.50705e-05
-0.102	0.001418	0.000653	-0.0009	0.00072		97.6562	0.000419282	0.000366565	0.000577008	6.2499e-05
-0.101	0.002106	0.000843	-0.0006	0.000888		99.6094	0.000150103	0.000280156	0.000156951	3.53748e-05
-0.1	0.002706	0.00098	-0.00028	0.001022
-0.099	0.003099	0.001046	1.65e-05	0.001081
-0.098	0.003203	0.001036	0.000247	0.001033
-0.097	0.003006	0.000965	0.00039	0.000869
-0.096	0.002574	0.000857	0.00045	0.000606
-0.095	0.002022	0.00074	0.000452	0.000277
-0.094	0.001482	0.000632	0.000434	-8.2e-05
-0.093	0.00107	0.000538	0.00043	-0.00044
-0.092	0.000863	0.000456	0.000462	-0.0008
-0.091	0.000889	0.000377	0.000529	-0.00114
-0.09	0.001118	0.000303	0.00061	-0.00148
-0.089	0.001464	0.000237	0.00067	-0.0018
-0.088	0.001818	0.000188	0.000671	-0.00209
-0.087	0.002075	0.000165	0.000587	-0.00232
-0.086	0.002175	0.000168	0.000413	-0.00246
-0.085	0.002108	0.000192	0.00017	-0.00248
-0.084	0.001907	0.000227	-0.0001	-0.00236
-0.083	0.001625	0.000262	-0.00035	-0.00211
-0.082	0.001315	0.000285	-0.00053	-0.00177
-0.081	0.001029	0.000285	-0.00061	-0.00137
-0.08	0.00081	0.000248	-0.00059	-0.00099
-0.079	0.000687	0.000156	-0.00047	-0.00068
-0.078	0.000671	8e-07	-0.00031	-0.0005
-0.077	0.000753	-0.00021	-0.00014	-0.00045
-0.076	0.000916	-0.00045	-1.2e-05	-0.00053
-0.075	0.001138	-0.00067	5.18e-05	-0.0007
-0.074	0.001399	-0.0008	4.48e-05	-0.00094
-0.073	0.001673	-0.00079	-2e-05	-0.00121
-0.072	0.001927	-0.00065	-0.00012	-0.0015
-0.071	0.002115	-0.00042	-0.00021	-0.00179
-0.07	0.002191	-0.00018	-0.00029	-0.00204
-0.069	0.002119	-3.3e-05	-0.00031	-0.00223
-0.068	0.001887	-2.2e-05	-0.00029	-0.00229
-0.067	0.001516	-0.00015	-0.00022	-0.00219
-0.066	0.001059	-0.00035	-0.00012	-0.00193
-0.065	0.000595	-0.00056	-1.3e-06	-0.00153
-0.064	0.000205	-0.0007	0.000118	-0.00103
-0.063	-3.8e-05	-0.00072	0.000228	-0.0005
-0.062	-8.8e-05	-0.00062	0.00032	-1.3e-05
-0.061	5.78e-05	-0.00041	0.000389	0.000382
-0.06	0.000347	-0.00014	0.000433	0.000659
-0.059	0.000683	0.000146	0.000452	0.00082
-0.058	0.000951	0.000422	0.00045	0.000882
-0.057	0.001061	0.00066	0.000433	0.000867
-0.056	0.000975	0.000841	0.00041	0.000793
-0.055	0.000714	0.000951	0.000385	0.000668
-0.054	0.000336	0.000979	0.000359	0.000502
-0.053	-9.7e-05	0.000925	0.000326	0.000305
-0.052	-0.00054	0.000797	0.000269	9.25e-05
-0.051	-0.00097	0.000613	0.000167	-0.00012
-0.05	-0.00137	0.000392	-7.25e-10	-0.0003
-0.049	-0.00172	0.000149	-0.00024	-0.00045
-0.048	-0.00201	-0.0001	-0.00055	-0.00055
-0.047	-0.00222	-0.00035	-0.00088	-0.00061
-0.046	-0.00237	-0.00059	-0.00119	-0.00064
-0.045	-0.00246	-0.00081	-0.00141	-0.00063
-0.044	-0.00251	-0.00101	-0.00147	-0.00058
-0.043	-0.0025	-0.00118	-0.00133	-0.00049
-0.042	-0.00242	-0.00131	-0.00098	-0.00034
-0.041	-0.00228	-0.0014	-0.00048	-0.00012
-0.04	-0.00206	-0.00146	0.000119	0.000149
-0.039	-0.00179	-0.0015	0.000706	0.000463
-0.038	-0.00149	-0.00155	0.001184	0.000797
-0.037	-0.00121	-0.00161	0.001479	0.001127
-0.036	-0.001	-0.0017	0.001559	0.001432
-0.035	-0.00087	-0.00182	0.001435	0.001691
-0.034	-0.00084	-0.00197	0.001161	0.00189
-0.033	-0.00088	-0.00214	0.000812	0.002014
-0.032	-0.00096	-0.00228	0.000465	0.002051
-0.031	-0.00107	-0.00235	0.000178	0.001988
-0.03	-0.00118	-0.0023	-2.2e-05	0.001815
-0.029	-0.00132	-0.00213	-0.00014	0.001531
-0.028	-0.00148	-0.00188	-0.0002	0.001139
-0.027	-0.00167	-0.00162	-0.00024	0.000657
-0.026	-0.00186	-0.00143	-0.00029	0.000109
-0.025	-0.00201	-0.00137	-0.00035	-0.00047
-0.024	-0.00211	-0.00145	-0.00043	-0.00105
-0.023	-0.00211	-0.00162	-0.00049	-0.00157
-0.022	-0.00201	-0.00182	-0.00054	-0.00199
-0.021	-0.0018	-0.00198	-0.00055	-0.00226
-0.02	-0.00151	-0.00203	-0.00054	-0.00234
-0.019	-0.00116	-0.00194	-0.00053	-0.00224
-0.018	-0.0008	-0.00171	-0.00054	-0.00196
-0.017	-0.00045	-0.00136	-0.00059	-0.00154
-0.016	-0.00015	-0.00094	-0.00068	-0.00099
-0.015	9.27e-05	-0.00049	-0.00078	-0.00034
-0.014	0.000284	-3.1e-05	-0.00084	0.000425
-0.013	0.000428	0.000428	-0.0008	0.00128
-0.012	0.000531	0.00087	-0.00062	0.002204
-0.011	0.000598	0.001264	-0.00027	0.003138
-0.01	0.000622	0.001552	0.000217	0.004007
-0.009	0.000574	0.001665	0.000794	0.004727
-0.008	0.00041	0.001538	0.001368	0.005222
-0.007	7.73e-05	0.001137	0.001841	0.005432
-0.006	-0.00047	0.000473	0.00213	0.005311
-0.005	-0.00123	-0.00039	0.002185	0.004832
-0.004	-0.00217	-0.00135	0.001999	0.003997
-0.003	-0.0032	-0.00227	0.001611	0.002849
-0.002	-0.0042	-0.00302	0.001088	0.001478
-0.001	-0.00503	-0.00349	0.000513	4.23e-06
0	-0.00561	-0.00366	-4e-05	-0.00145
0.001	-0.00588	-0.00355	-0.00052	-0.00276
0.002	-0.00583	-0.00322	-0.0009	-0.00388
0.003	-0.00548	-0.00275	-0.00119	-0.00475
0.004	-0.00491	-0.00218	-0.0014	-0.00536
0.005	-0.00419	-0.00155	-0.00155	-0.00572
0.006	-0.00342	-0.00088	-0.00166	-0.00581
0.007	-0.00266	-0.00018	-0.00171	-0.00563
0.008	-0.00201	0.000497	-0.00169	-0.00518
0.009	-0.00148	0.001089	-0.00159	-0.00449
0.01	-0.00111	0.001542	-0.00137	-0.0036
0.011	-0.00088	0.001825	-0.00105	-0.00257
0.012	-0.00077	0.001937	-0.00064	-0.00149
0.013	-0.00073	0.001903	-0.00018	-0.00042
0.014	-0.00073	0.001757	0.000294	0.000578
0.015	-0.00078	0.001543	0.000726	0.001467
0.016	-0.00087	0.001301	0.001085	0.002228
0.017	-0.00101	0.001073	0.001355	0.002849
0.018	-0.00121	0.000887	0.001531	0.00331
0.019	-0.00145	0.000761	0.001621	0.003586
0.02	-0.0017	0.000701	0.001634	0.003649
0.021	-0.00189	0.000702	0.001578	0.003485
0.022	-0.00198	0.000751	0.001454	0.003101
0.023	-0.00195	0.000824	0.00126	0.002527
0.024	-0.0018	0.000897	0.000993	0.001809
0.025	-0.00155	0.000958	0.000659	0.001007
0.026	-0.00125	0.001011	0.000274	0.000191
0.027	-0.00091	0.001076	-0.00013	-0.00057
0.028	-0.00054	0.001175	-0.00053	-0.00122
0.029	-0.00014	0.001317	-0.00088	-0.00172
0.03	0.000258	0.001486	-0.00115	-0.00208
0.031	0.000636	0.001641	-0.00134	-0.00231
0.032	0.000957	0.001728	-0.00145	-0.00244
0.033	0.001192	0.001699	-0.00149	-0.00252
0.034	0.001322	0.001533	-0.00146	-0.00254
0.035	0.001351	0.001251	-0.00138	-0.00251
0.036	0.001306	0.000919	-0.00124	-0.00241
0.037	0.001234	0.00062	-0.00102	-0.00219
0.038	0.001184	0.00042	-0.0007	-0.00186
0.039	0.001191	0.000332	-0.00028	-0.00143
0.04	0.001261	0.000308	0.000207	-0.00095
0.041	0.001369	0.000266	0.000727	-0.00048
0.042	0.001467	0.000137	0.001206	-7.2e-05
0.043	0.001498	-9.7e-05	0.001567	0.000232
0.044	0.001421	-0.00039	0.001744	0.000424
0.045	0.001229	-0.00063	0.001699	0.000519
0.046	0.000967	-0.00074	0.001439	0.000548
0.047	0.00071	-0.00067	0.001012	0.00054
0.048	0.000537	-0.00043	0.0005	0.000513
0.049	0.000501	-0.00012	-4.7e-06	0.000473
0.05	0.000617	0.000159	-0.00042	0.000414
0.051	0.000866	0.000312	-0.0007	0.000328
0.052	0.001206	0.000281	-0.00083	0.000215
0.053	0.00159	6.09e-05	-0.00083	7.73e-05
0.054	0.001973	-0.0003	-0.00074	-7.8e-05
0.055	0.002321	-0.00073	-0.00063	-0.00025
0.056	0.002612	-0.00113	-0.00052	-0.00042
0.057	0.002834	-0.00143	-0.00043	-0.00062
0.058	0.002993	-0.00158	-0.00035	-0.00083
0.059	0.0031	-0.00157	-0.00026	-0.00108
0.06	0.003168	-0.00141	-0.00013	-0.00135
0.061	0.003199	-0.00116	6.29e-05	-0.00164
0.062	0.003187	-0.00084	0.000297	-0.00189
0.063	0.003114	-0.00051	0.000546	-0.00207
0.064	0.00296	-0.00018	0.000763	-0.00212
0.065	0.00271	0.000139	0.000901	-0.00203
0.066	0.002365	0.000443	0.000926	-0.00177
0.067	0.001944	0.000732	0.000824	-0.00135
0.068	0.001487	0.000985	0.000609	-0.00083
0.069	0.001042	0.001166	0.000315	-0.00025
0.07	0.000654	0.001222	-1.6e-05	0.000311
0.071	0.000351	0.001108	-0.00034	0.000775
0.072	0.000143	0.000804	-0.00063	0.001086
0.073	2.06e-05	0.000337	-0.00085	0.001225
0.074	-3.7e-05	-0.00022	-0.00101	0.001213
0.075	-5.4e-05	-0.00076	-0.0011	0.001112
0.076	-4.8e-05	-0.00116	-0.00112	0.00099
0.077	-2.1e-05	-0.00136	-0.00106	0.000894
0.078	3.85e-05	-0.00131	-0.00091	0.000825
0.079	0.000149	-0.00107	-0.00068	0.000742
0.08	0.000324	-0.00071	-0.00036	0.000584
0.081	0.000562	-0.00035	2.56e-05	0.000309
0.082	0.000839	-9.2e-05	0.000426	-8.1e-05
0.083	0.001111	8.01e-06	0.000798	-0.00054
0.084	0.001325	-5.1e-05	0.001094	-0.00098
0.085	0.001429	-0.00022	0.001278	-0.00133
0.086	0.001393	-0.00041	0.001338	-0.00153
0.087	0.001228	-0.00057	0.00128	-0.00155
0.088	0.000983	-0.00065	0.001129	-0.00139
0.089	0.000725	-0.00067	0.000917	-0.0011
0.09	0.000511	-0.00067	0.000671	-0.00072
0.091	0.000364	-0.00069	0.000409	-0.00034
0.092	0.000269	-0.00079	0.000133	-4.5e-06
0.093	0.000187	-0.00095	-0.00016	0.000244
0.094	7.66e-05	-0.00117	-0.00046	0.00039
0.095	-8.4e-05	-0.00139	-0.00077	0.00044
0.096	-0.00029	-0.00159	-0.00105	0.000417
0.097	-0.00051	-0.00173	-0.00126	0.000346
0.098	-0.0007	-0.00177	-0.00136	0.000243
0.099	-0.00084	-0.00169	-0.00131	0.000122
0.1	-0.00091	-0.00149	-0.00111	-5.4e-06
0.101	-0.00091	-0.00117	-0.00077	-0.00012
0.102	-0.00088	-0.00075	-0.00035	-0.0002
0.103	-0.00086	-0.00027	7.8e-05	-0.00021
0.104	-0.00085	0.000237	0.000452	-0.00014
0.105	-0.00086	0.000707	0.000713	2.56e-05
0.106	-0.00086	0.001093	0.000835	0.000245
0.107	-0.00082	0.001364	0.000825	0.000485
0.108	-0.00067	0.001522	0.000716	0.000713
0.109	-0.00036	0.001589	0.000555	0.000908
0.11	9.6e-05	0.001592	0.000387	0.001059
0.111	0.000661	0.00154	0.000247	0.00116
0.112	0.001217	0.001419	0.000144	0.001202
0.113	0.001623	0.001202	7.09e-05	0.001177
0.114	0.001758	0.000875	8.11e-06	0.00108
0.115	0.001567	0.000455	-6.4e-05	0.000916
0.116	0.001081	2.31e-06	-0.00016	0.000704
0.117	0.000408	-0.0004	-0.00026	0.000476
0.118	-0.00031	-0.00065	-0.00035	0.00026
0.119	-0.00093	-0.00071	-0.0004	7.23e-05
0.12	-0.00135	-0.00058	-0.00038	-8.6e-05
0.121	-0.00152	-0.00031	-0.00028	-0.00022
0.122	-0.00145	4.47e-05	-0.00012	-0.00034
0.123	-0.00121	0.00042	8.14e-05	-0.00043
0.124	-0.00087	0.000787	0.000273	-0.00045
0.125	-0.00051	0.00114	0.00041	-0.00036
0.126	-0.0002	0.001478	0.000459	-0.00014
0.127	4.6e-05	0.001789	0.000408	0.000215
0.128	0.000219	0.002038	0.000275	0.000642
0.129	0.000326	0.002177	9.86e-05	0.001079
0.13	0.000381	0.002174	-7.2e-05	0.001462
0.131	0.000398	0.002028	-0.00019	0.001751
0.132	0.000386	0.001784	-0.00024	0.00193
0.133	0.000351	0.001519	-0.0002	0.001997
0.134	0.000293	0.001321	-0.00012	0.001957
0.135	0.000216	0.00126	-3.4e-05	0.001821
0.136	0.000136	0.001365	1.11e-05	0.001619
0.137	8.39e-05	0.001608	-1.6e-05	0.001396
0.138	9.82e-05	0.001909	-0.00012	0.001208
0.139	0.000207	0.002158	-0.00028	0.001099
0.14	0.000413	0.002255	-0.00044	0.001079
0.141	0.000697	0.002145	-0.00056	0.001114
0.142	0.001017	0.00183	-0.00057	0.001138
0.143	0.001325	0.001371	-0.00047	0.00108
0.144	0.001571	0.000869	-0.00026	0.000894
0.145	0.001718	0.000428	2.71e-05	0.000586
0.146	0.001743	0.000138	0.00033	0.000209
0.147	0.001648	4.52e-05	0.000588	-0.00015
0.148	0.001458	0.000149	0.000754	-0.00041
0.149	0.001215	0.0004	0.000805	-0.00052

## Sheet: Panel C
Figure 2-figure supplement 7B left (raw data for Figure 3Cii)
	GFP controls			hM4(aIC)-pIC
	preCS	R-CS	F-CS	preCS	R-CS	F-CS
Mouse 1	1.5	6	1.5	1.5	3	0
Mouse 2	4	16.5	0	1	9	0
Mouse 3	2.5	19.5	0	1.5	1.5	0
Mouse 4	0	3	0	1.5	6	0
Mouse 5	1	4.5	0	1	12	0
Mouse 6	4.5	24	1.5	7	36	1.5
Mouse 7	0.5	0	0	2.5	10.5	0
Mouse 8	2	21	0	2	31.5	1.5
Mouse 9	1	33	0	2	12	0
Mouse 10	4	19.5	1.5
Mouse 11	8.5	25.5	6
Mouse 12	0.5	4.5	0
Figure 2-figure supplement 7B right (raw data for Figure 3Cii)
	GFP controls			hM4(aIC)-pIC
	BL	R-CS	F-CS	BL	R-CS	F-CS
Mouse 1	8.75	32.625	63.625	3.66667	4.625	42
Mouse 2	30.6667	63.75	50.25	7.5	36	52.375
Mouse 3	1.5	17.25	48	23.8333	24.375	83.5
Mouse 4	5.91667	36.75	61.875	5.91667	3.5	22.375
Mouse 5	7.91667	30.625	38.875	4.66667	11	47.25
Mouse 6	21.5	34.125	54.25	3.75	10.375	33.375
Mouse 7	42.0833	29.5	60.875	4.91667	4.75	46.5
Mouse 8	15.9167	31	71.625	2.75	3.125	42.25
Mouse 9	34.25	16.625	80.125	11.0833	33	15.5
Mouse 10	20.6667	10.375	62.125
Mouse 11	14.9167	50.5	77.75
Mouse 12	17.5	55.375	77.5
