# Supplementary material for: The amygdala instructs insular feedback for affective learning
Source: eLife. 2020 Nov 20;9:e60336. doi: 10.7554/eLife.60336 (PMC7679142; doi:10.7554/eLife.60336)
Supplement: Figure 4—figure supplement 1—source data 1. [file elife-60336-fig4-figsupp1-data1.xlsx]

## Sheet: CEnmda
	Frontal.Pole.L	Frontal.Pole.R	Orbital.Area.L	Orbital.Area.R	Prelimbic.Area.L	Prelimbic.Area.R	Infralimbic.Area.L	Infralimbic.Area.R	Anterior.cingulate.Area.L	Anterior.cingulate.Area.R	Insular Cortex.L	Insular Cortex.R	Retrosplenial.Area.L	Retrosplenial.Area.R	Post.parietal.assoc.L	Post.parietal.assoc.R	Temporal.association.area.L	Temporal.association.area.R	Somatomotor.Areas.L	Somatomotor.Areas.R	Somatosensory.Areas.L	Somatosensory.Areas.R	Auditory.Area.L	Auditory.Area.R	Visual.Area.L	Visual.Area.R	Perirhinal.area.L	Perirhinal.area.R	Ectorhinal.area.L	Ectorhinal.Area.R	Piriform.L	Piriform.R	Entorhinal.Area.L	Entorhinal.Area.R	Hippocampus.L	Hippocampus.R	Central Amygdala.L	Central Amygdala.R	Amygdala.cortex.L	Amygdala.cortex.R	Caudoputamen.L	Caudoputamen.R	Accumbens.L	Accumbens.R	Lateral.septal.complex.L	Lateral.septal.complex.R	Pallidium.dorsal.L	Pallidium.dorsal.R	Pallidium.ventral.L
Frontal.Pole.L	1	0.331066	0.48894	0	0.68956	0.380261	0.295096	0.137775	0.182707	0	0.281055	0	0	0	0.155464	0.132211	0.349905	0	0.444844	0	0.345815	0	0	0.199966	0	0.298314	0.410058	0	0.349138	0	0.284446	0.214763	0	0	0.35553	0	0.207192	0	0.409777	0	0.260761	0.140596	0.164264	0.147137	0.233396	0	0	0.182999	0.168983
Frontal.Pole.R	0.331066	1	0	0.146991	0.341697	0.456508	0	0	0	0	0	0	0	0.21873	-0.185793	0	0	0	0	0.24987	0	-0.191855	0	-0.133848	0	0	0	0.219096	0	0	0.255039	0	-0.254515	0.202353	0	0	0.171051	0	0.257077	0	0	0.23044	0	0.205679	0	0	0	0.194029	0.319938
Orbital.Area.L	0.48894	0	1	0.579693	0.471405	0.289128	0.653146	0.197166	0	0.164883	0.210541	0	0.159291	0	0.257113	0	0.139433	0	0.321857	0	0.243523	0	-0.252535	0	0.162732	0.302254	0.172173	-0.135849	0	0	0.205207	0.439333	0	0	0	0	0	0	0	0	0.178495	0.23078	0.298615	0.347262	0.325496	0.18066	0	0.337645	0
Orbital.Area.R	0	0.146991	0.579693	1	0	0.441653	0.548822	0.540799	0.170421	0.408378	0	0	0.435945	0.251325	0	0	0	0.266376	0.27996	0.171576	0	-0.170333	0	0.142064	0.248847	0.205954	0	0	-0.19406	0	0	0.388387	0	-0.176467	0	0	-0.136561	0	0	0	0	0.233493	0.269306	0.417081	0.280238	0.366483	0	0.172712	0
Prelimbic.Area.L	0.68956	0.341697	0.471405	0	1	0.594107	0.485823	0	0.262393	0.182704	0.132616	0	0.146511	0	0.18322	0	0	0	0.345684	0.256018	0.163239	0	0	0.132658	0	0.15171	0.208246	0.247292	0	0	0	0.320063	0	0.142118	0	0	0	0	0.220729	0	0	0.140169	0	0.18689	0.182709	0	0	0.171004	0
Prelimbic.Area.R	0.380261	0.456508	0.289128	0.441653	0.594107	1	0.247498	0.202059	0	0.343134	0	0	0.293733	0.342489	0	0	0	0.141653	0.34303	0.43645	0.152197	0	0	0.249249	0.169279	0	0.131949	0	0	0	0	0.359173	-0.133059	0	0	-0.190325	0	0.197283	0	0	0.173807	0	0	0.310103	0.216815	0	0	0.167076	0.201975
Infralimbic.Area.L	0.295096	0	0.653146	0.548822	0.485823	0.247498	1	0.408525	0.344188	0.300208	0.313155	0.270334	0.256205	0	0.236834	-0.182678	0	0	0.333132	0.153901	0.200321	0	0	-0.300686	0.234103	0.208725	0	0	-0.172932	0	0.272044	0.592189	0	0	0	0	0	0	0	0	0	0.438183	0.406678	0.540001	0.322285	0.417411	0	0.164325	0.168518
Infralimbic.Area.R	0.137775	0	0.197166	0.540799	0	0.202059	0.408525	1	0.301639	0.492673	0.284334	0	0.202711	0	0	0	0	0	0.259437	0.208447	0	0	0	0	0	0	0	0	0	-0.210596	0.194554	0.299423	0	-0.165753	0	-0.209277	0.145208	0	0.346006	0	0	0.236508	0	0.407182	0	0.342082	0	0	0
Anterior.cingulate.Area.L	0.182707	0	0	0.170421	0.262393	0	0.344188	0.301639	1	0.673685	0.203753	0.266249	0	-0.265805	0	0	-0.18339	0	0.240768	0.442639	0.156843	0	0.145471	0	0	0	0	0	0	-0.278553	0	0.197483	-0.234508	0	0	-0.212233	0	0.292807	0.20428	0	0.294776	0.344258	0.340781	0.243052	0.166634	0.298093	0	0.167602	0.243389
Anterior.cingulate.Area.R	0	0	0.164883	0.408378	0.182704	0.343134	0.300208	0.492673	0.673685	1	0.268841	0.166329	0.163098	0	0	0	0	0	0.179365	0.524285	0.176752	0	0.324699	0	0.129635	0	0	0	-0.230286	-0.21384	0	0.268538	-0.174334	0	0.213763	-0.282201	0	0.267792	0.252584	0.283139	0.260198	0.352729	0.181264	0.315934	0	0.400556	-0.160904	0.325197	0
Insular Cortex.L	0.281055	0	0.210541	0	0.132616	0	0.313155	0.284334	0.203753	0.268841	1	0.428331	-0.182912	-0.225159	0.209573	0	0.213775	-0.284443	0.312568	0.231516	0.539942	0.164989	0.195222	-0.203728	0	0	0.163793	0	0	-0.24111	0.301723	0.298489	0.186854	0	0	-0.157796	0.258802	0	0.169504	0.148914	0.552081	0.450459	0.407729	0.25927	0.390995	0.458876	0.220835	0.141501	0.397744
Insular Cortex.R	0	0	0	0	0	0	0.270334	0	0.266249	0.166329	0.428331	1	0.190252	0	0	-0.221829	-0.139129	0	0.253177	0.385529	0.373969	0	0.249907	-0.252595	0	-0.131271	0	0.208343	0	0.158865	0	0.289801	0	0	0	0	0.18302	-0.211959	0	0	0.367984	0.344994	0.318695	0.323193	0.31361	0.255011	0.276685	0.139437	0.194499
Retrosplenial.Area.L	0	0	0.159291	0.435945	0.146511	0.293733	0.256205	0.202711	0	0.163098	-0.182912	0.190252	1	0.564875	0.307627	-0.149169	0	0.445208	0.164532	0.352193	0	0	0	0	0.563969	0.205915	-0.215006	0.232011	0	0.326377	-0.140603	0	0	-0.141326	0	-0.17389	-0.329579	-0.2274	0	-0.22962	0	0	0	0.219646	0	0	-0.200289	0	-0.196611
Retrosplenial.Area.R	0	0.21873	0	0.251325	0	0.342489	0	0	-0.265805	0	-0.225159	0	0.564875	1	0	0.164431	0	0.33953	0.204559	0.130468	0	-0.192973	0	0	0.544143	0.324822	-0.197719	0	0	0.27617	0	0	0	-0.182013	0	0.159487	0	0	0	0	0	-0.137435	0	0.239331	-0.159805	-0.185046	-0.26811	0	0
Post.parietal.assoc.L	0.155464	-0.185793	0.257113	0	0.18322	0	0.236834	0	0	0	0.209573	0	0.307627	0	1	-0.174511	0.499824	0	0	0	0	0.216577	0.42912	-0.149828	0.482652	0.156826	0	0	0.166132	0	-0.26659	0	0.223699	0	0.295945	0	-0.346179	-0.129991	-0.192726	0	0	0	0.210566	0.203072	0.274634	0.252833	0	0.305121	0
Post.parietal.assoc.R	0.132211	0	0	0	0	0	-0.182678	0	0	0	0	-0.221829	-0.149169	0.164431	-0.174511	1	0	0.16897	0	0	-0.132337	-0.162565	-0.245199	0.389068	0.234423	0.273166	0.137862	0	0	0	0.385505	0.197548	0.144555	0	0.335607	0.204805	0	0.180552	0.217909	-0.241833	0	0	0	0	-0.181336	0	0	0	0
Temporal.association.area.L	0.349905	0	0.139433	0	0	0	0	0	-0.18339	0	0.213775	-0.139129	0	0	0.499824	0	1	0	0.308227	-0.239323	0	0	0.204011	0	0.298367	0.361572	0.361098	-0.140318	0.565231	0	0	0	0.304482	-0.178209	0.504779	0.194238	0	-0.167822	0	0	0	0	0.200981	0	0.181975	0	0	0	0
Temporal.association.area.R	0	0	0	0.266376	0	0.141653	0	0	0	0	-0.284443	0	0.445208	0.33953	0	0.16897	0	1	0	0	-0.221975	0	0	0.511182	0.346045	0.44338	0.140358	0.134715	0	0.652476	-0.325499	-0.269729	0.131465	-0.209778	0.244896	0	-0.248891	-0.186122	0	0	-0.252581	-0.241536	0	-0.211202	0	-0.216818	-0.401136	0	-0.216083
Somatomotor.Areas.L	0.444844	0	0.321857	0.27996	0.345684	0.34303	0.333132	0.259437	0.240768	0.179365	0.312568	0.253177	0.164532	0.204559	0	0	0.308227	0	1	0.184188	0.194319	0	0	0	0.232443	0.279456	0.197035	-0.277927	0	0	0.324202	0	0	-0.378078	0	0	0.416478	0	0.241066	-0.190833	0.331365	0	0.4613	0.193005	0.291367	0	0	-0.218913	0.46899
Somatomotor.Areas.R	0	0.24987	0	0.171576	0.256018	0.43645	0.153901	0.208447	0.442639	0.524285	0.231516	0.385529	0.352193	0.130468	0	0	-0.239323	0	0.184188	1	0.291972	0	0.374991	0	0.213818	0	-0.171405	0.218738	-0.21211	0	0	0	-0.287047	-0.130514	0.216647	-0.356998	0	0.315865	0.146726	0.195761	0.328052	0.25851	0	0.226162	0	0.232951	0.153835	0.190407	0.20885
Somatosensory.Areas.L	0.345815	0	0.243523	0	0.163239	0.152197	0.200321	0	0.156843	0.176752	0.539942	0.373969	0	0	0	-0.132337	0	-0.221975	0.194319	0.291972	1	0.1703	0	-0.219054	0	-0.182728	0	0	0	-0.172121	0.220565	0	0	0	-0.149863	0	0.196928	0	0	0.19153	0.433273	0.430485	0	0.319432	0.24372	0.13542	0.22322	0.257708	0
Somatosensory.Areas.R	0	-0.191855	0	-0.170333	0	0	0	0	0	0	0.164989	0	0	-0.192973	0.216577	-0.162565	0	0	0	0	0.1703	1	0.252407	-0.237175	0	0	0	-0.14411	0	-0.215482	0	-0.245613	-0.21498	0	0	-0.39008	0	0.267432	0	0.232561	0	0	0	-0.260134	0.319671	0	0.157602	0	0
Auditory.Area.L	0	0	-0.252535	0	0	0	0	0	0.145471	0.324699	0.195222	0.249907	0	0	0.42912	-0.245199	0.204011	0	0	0.374991	0	0.252407	1	-0.289452	0	0	0	0	0	0	-0.237963	0	0	0	0.375848	-0.163683	0	0	0	0.30433	0.174382	0.129814	0	0.255212	0.200253	0.305332	0	0	0
Auditory.Area.R	0.199966	-0.133848	0	0.142064	0.132658	0.249249	-0.300686	0	0	0	-0.203728	-0.252595	0	0	-0.149828	0.389068	0	0.511182	0	0	-0.219054	-0.237175	-0.289452	1	0	0.158444	0.214001	0	0.196583	0	0	-0.136306	0	-0.132197	0.177513	0.198551	0	0	0	-0.344554	0	-0.218075	0	-0.199356	0	-0.155808	-0.168037	0	-0.143735
Visual.Area.L	0	0	0.162732	0.248847	0	0.169279	0.234103	0	0	0.129635	0	0	0.563969	0.544143	0.482652	0.234423	0.298367	0.346045	0.232443	0.213818	0	0	0	0	1	0.535742	0	0	0	0.217464	0	0.139413	0.347962	0	0.273453	0.18616	-0.213179	0	-0.130267	-0.231878	0	0.169936	0.232081	0.306841	0.143811	0.226213	0	0	0
Visual.Area.R	0.298314	0	0.302254	0.205954	0.15171	0	0.208725	0	0	0	0	-0.131271	0.205915	0.324822	0.156826	0.273166	0.361572	0.44338	0.279456	0	-0.182728	0	0	0.158444	0.535742	1	0.523968	-0.135727	0.227653	0.330638	0.144809	0.152711	0.243909	-0.196058	0.42177	0.263391	0	0	0	-0.189784	0	0	0.21892	0.134712	0.14589	0	-0.299686	0	0
Perirhinal.area.L	0.410058	0	0.172173	0	0.208246	0.131949	0	0	0	0	0.163793	0	-0.215006	-0.197719	0	0.137862	0.361098	0.140358	0.197035	-0.171405	0	0	0	0.214001	0	0.523968	1	0	0.370229	0	0	0.219778	0.327309	0	0.329263	0	0.142757	0	0	0	0.23153	0	0.238469	0	0.137393	0.151181	0	0	0.199209
Perirhinal.area.R	0	0.219096	-0.135849	0	0.247292	0	0	0	0	0	0	0.208343	0.232011	0	0	0	-0.140318	0.134715	-0.277927	0.218738	0	-0.14411	0	0	0	-0.135727	0	1	0	0.540012	0	0.139061	0	0.335352	0.154121	0	-0.279107	-0.1852	0	0.148381	-0.132401	0.178944	0	0	-0.315861	-0.181978	0	0	-0.22006
Ectorhinal.area.L	0.349138	0	0	-0.19406	0	0	-0.172932	0	0	-0.230286	0	0	0	0	0.166132	0	0.565231	0	0	-0.21211	0	0	0	0.196583	0	0.227653	0.370229	0	1	0	0.272709	0	0	0	0.293733	0	0.181161	0	0.153479	-0.275877	0	0	0	-0.160864	0	-0.155762	0	0	0.153653
Ectorhinal.Area.R	0	0	0	0	0	0	0	-0.210596	-0.278553	-0.21384	-0.24111	0.158865	0.326377	0.27617	0	0	0	0.652476	0	0	-0.172121	-0.215482	0	0	0.217464	0.330638	0	0.540012	0	1	-0.234343	0	0	0	0.205571	0.142625	-0.368853	-0.434296	0	0	-0.330702	-0.214696	0	-0.170744	-0.227155	-0.292975	-0.417598	0	-0.16772
Piriform.L	0.284446	0.255039	0.205207	0	0	0	0.272044	0.194554	0	0	0.301723	0	-0.140603	0	-0.26659	0.385505	0	-0.325499	0.324202	0	0.220565	0	-0.237963	0	0	0.144809	0	0	0.272709	-0.234343	1	0.418839	-0.155841	-0.276123	0	0	0.514347	0	0.464845	-0.266576	0.236077	0.325229	0.261098	0.354792	0	0	0.226171	0	0.360793
Piriform.R	0.214763	0	0.439333	0.388387	0.320063	0.359173	0.592189	0.299423	0.197483	0.268538	0.298489	0.289801	0	0	0	0.197548	0	-0.269729	0	0	0	-0.245613	0	-0.136306	0.139413	0.152711	0.219778	0.139061	0	0	0.418839	1	0.183525	0	0	0	0	0	0.296182	0	0.330004	0.409827	0.240668	0.595663	0	0.318498	0.271093	0.178975	0.28683
Entorhinal.Area.L	0	-0.254515	0	0	0	-0.133059	0	0	-0.234508	-0.174334	0.186854	0	0	0	0.223699	0.144555	0.304482	0.131465	0	-0.287047	0	-0.21498	0	0	0.347962	0.243909	0.327309	0	0	0	-0.155841	0.183525	1	0	0.135216	0.332471	0	-0.167822	0	0.164897	0	0	0	0	0	0	0	0	0
Entorhinal.Area.R	0	0.202353	0	-0.176467	0.142118	0	0	-0.165753	0	0	0	0	-0.141326	-0.182013	0	0	-0.178209	-0.209778	-0.378078	-0.130514	0	0	0	-0.132197	0	-0.196058	0	0.335352	0	0	-0.276123	0	0	1	0	0.145938	-0.385771	0	-0.153536	0	-0.216289	0	0	0	-0.224495	-0.261471	0	0.131176	0
Hippocampus.L	0.35553	0	0	0	0	0	0	0	0	0.213763	0	0	0	0	0.295945	0.335607	0.504779	0.244896	0	0.216647	-0.149863	0	0.375848	0.177513	0.273453	0.42177	0.329263	0.154121	0.293733	0.205571	0	0	0.135216	0	1	0.145348	0	0	0.230751	0	0	0	0.141009	0	0	0	0	0	0
Hippocampus.R	0	0	0	0	0	-0.190325	0	-0.209277	-0.212233	-0.282201	-0.157796	0	-0.17389	0.159487	0	0.204805	0.194238	0	0	-0.356998	0	-0.39008	-0.163683	0.198551	0.18616	0.263391	0	0	0	0.142625	0	0	0.332471	0.145938	0.145348	1	0	-0.195439	-0.199222	-0.177987	-0.222544	0	0	0	0	-0.171305	0	0.15611	0
Central Amygdala.L	0.207192	0.171051	0	-0.136561	0	0	0	0.145208	0	0	0.258802	0.18302	-0.329579	0	-0.346179	0	0	-0.248891	0.416478	0	0.196928	0	0	0	-0.213179	0	0.142757	-0.279107	0.181161	-0.368853	0.514347	0	0	-0.385771	0	0	1	0.302609	0.464629	0.140782	0.147254	0.152927	0	0	0.230084	0	0	-0.155886	0.475205
Central Amygdala.R	0	0	0	0	0	0.197283	0	0	0.292807	0.267792	0	-0.211959	-0.2274	0	-0.129991	0.180552	-0.167822	-0.186122	0	0.315865	0	0.267432	0	0	0	0	0	-0.1852	0	-0.434296	0	0	-0.167822	0	0	-0.195439	0.302609	1	0	0.455079	0	0	0	-0.139864	0	0	0.154909	0.17531	0.471488
Amygdala.cortex.L	0.409777	0.257077	0	0	0.220729	0	0	0.346006	0.20428	0.252584	0.169504	0	0	0	-0.192726	0.217909	0	0	0.241066	0.146726	0	0	0	0	-0.130267	0	0	0	0.153479	0	0.464845	0.296182	0	-0.153536	0.230751	-0.199222	0.464629	0	1	0	0.382717	0.184783	0.195876	0	0	0	0	0	0.281078
Amygdala.cortex.R	0	0	0	0	0	0	0	0	0	0.283139	0.148914	0	-0.22962	0	0	-0.241833	0	0	-0.190833	0.195761	0.19153	0.232561	0.30433	-0.344554	-0.231878	-0.189784	0	0.148381	-0.275877	0	-0.266576	0	0.164897	0	0	-0.177987	0.140782	0.455079	0	1	0	0	-0.220789	0	-0.177188	0	0	0	0
Caudoputamen.L	0.260761	0	0.178495	0	0	0.173807	0	0	0.294776	0.260198	0.552081	0.367984	0	0	0	0	0	-0.252581	0.331365	0.328052	0.433273	0	0.174382	0	0	0	0.23153	-0.132401	0	-0.330702	0.236077	0.330004	0	-0.216289	0	-0.222544	0.147254	0	0.382717	0	1	0.404455	0.479228	0.318632	0.349681	0.323752	0.51428	0.151112	0.391059
Caudoputamen.R	0.140596	0.23044	0.23078	0.233493	0.140169	0	0.438183	0.236508	0.344258	0.352729	0.450459	0.344994	0	-0.137435	0	0	0	-0.241536	0	0.25851	0.430485	0	0.129814	-0.218075	0.169936	0	0	0.178944	0	-0.214696	0.325229	0.409827	0	0	0	0	0.152927	0	0.184783	0	0.404455	1	0.270292	0.553213	0.421833	0.59913	0.318162	0.558461	0.172324
Accumbens.L	0.164264	0	0.298615	0.269306	0	0	0.406678	0	0.340781	0.181264	0.407729	0.318695	0	0	0.210566	0	0.200981	0	0.4613	0	0	0	0	0	0.232081	0.21892	0.238469	0	0	0	0.261098	0.240668	0	0	0.141009	0	0	0	0.195876	-0.220789	0.479228	0.270292	1	0.263018	0.547875	0.490782	0.145516	0.13452	0.595613
Accumbens.R	0.147137	0.205679	0.347262	0.417081	0.18689	0.310103	0.540001	0.407182	0.243052	0.315934	0.25927	0.323193	0.219646	0.239331	0.203072	0	0	-0.211202	0.193005	0.226162	0.319432	-0.260134	0.255212	-0.199356	0.306841	0.134712	0	0	-0.160864	-0.170744	0.354792	0.595663	0	0	0	0	0	-0.139864	0	0	0.318632	0.553213	0.263018	1	0.130302	0.565897	0.156535	0.264567	0
Lateral.septal.complex.L	0.233396	0	0.325496	0.280238	0.182709	0.216815	0.322285	0	0.166634	0	0.390995	0.31361	0	-0.159805	0.274634	-0.181336	0.181975	0	0.291367	0	0.24372	0.319671	0.200253	0	0.143811	0.14589	0.137393	-0.315861	0	-0.227155	0	0	0	-0.224495	0	0	0.230084	0	0	-0.177188	0.349681	0.421833	0.547875	0.130302	1	0.520102	0.373577	0.191346	0.348951
Lateral.septal.complex.R	0	0	0.18066	0.366483	0	0	0.417411	0.342082	0.298093	0.400556	0.458876	0.255011	0	-0.185046	0.252833	0	0	-0.216818	0	0.232951	0.13542	0	0.305332	-0.155808	0.226213	0	0.151181	-0.181978	-0.155762	-0.292975	0	0.318498	0	-0.261471	0	-0.171305	0	0	0	0	0.323752	0.59913	0.490782	0.565897	0.520102	1	0.243509	0.282106	0.186855
Pallidium.dorsal.L	0	0	0	0	0	0	0	0	0	-0.160904	0.220835	0.276685	-0.200289	-0.26811	0	0	0	-0.401136	0	0.153835	0.22322	0.157602	0	-0.168037	0	-0.299686	0	0	0	-0.417598	0.226171	0.271093	0	0	0	0	0	0.154909	0	0	0.51428	0.318162	0.145516	0.156535	0.373577	0.243509	1	0.229681	0.234271
Pallidium.dorsal.R	0.182999	0.194029	0.337645	0.172712	0.171004	0.167076	0.164325	0	0.167602	0.325197	0.141501	0.139437	0	0	0.305121	0	0	0	-0.218913	0.190407	0.257708	0	0	0	0	0	0	0	0	0	0	0.178975	0	0.131176	0	0.15611	-0.155886	0.17531	0	0	0.151112	0.558461	0.13452	0.264567	0.191346	0.282106	0.229681	1	0
Pallidium.ventral.L	0.168983	0.319938	0	0	0	0.201975	0.168518	0	0.243389	0	0.397744	0.194499	-0.196611	0	0	0	0	-0.216083	0.46899	0.20885	0	0	0	-0.143735	0	0	0.199209	-0.22006	0.153653	-0.16772	0.360793	0.28683	0	0	0	0	0.475205	0.471488	0.281078	0	0.391059	0.172324	0.595613	0	0.348951	0.186855	0.234271	0	1
Pallidium.ventral.R	0.1471	0	0.257694	0.169802	0	0	0.333723	0	0.254377	0.292146	0.241662	0	0	0	0.164176	0.16667	0	-0.170666	0.177898	0.192274	0.160219	0	0.160979	-0.14891	0.290243	0.218747	0.182138	-0.22299	0	-0.213128	0.245459	0.34108	-0.208996	0	0	0	0	0.232292	0.222162	-0.219549	0.472734	0.335484	0.581525	0.394225	0.192974	0.403457	0.192692	0.35573	0.328065
Pallidium.medial.L	0	0.21494	0	0	0	0	0.163694	0	0.390002	0.206484	0.280357	0.18076	0	0.130281	0	0.247723	0	0	0.242263	0.295097	0.28113	0	0	0	0.138003	0	0	0	0	0	0.324446	0	-0.209687	-0.209937	0	0	0.333476	0.424894	0.204519	0	0.289187	0.427037	0.470904	0.15292	0.274589	0.235448	0	0.130715	0.589546
Pallidium.medial.R	0	0	0	0.198712	0	0	0.242007	0	0.321452	0.215667	0.260729	0	0	0	0	0.167743	0.137687	0	0.24485	0	0	0	0	0	0	0.305819	0.258702	-0.240868	0	0	0.335363	0.279091	0	0	0	0	0.255541	0	0.326769	0	0.35446	0.326442	0.668459	0.288584	0.279113	0.331589	0	0.16993	0.481579
Pallidium.caudal.L	0.31616	0	0.189268	0	0	0	0	-0.342902	0	0	0.362673	0	-0.170659	-0.167086	0	0	0.228231	0	0.272778	0	0.27633	0.341874	0	0	0	0.132428	0.164335	0	0	0	0.201314	0	0	0	0	0.143971	0.131494	0	0	0	0.349604	0.176621	0.411365	-0.18447	0.486185	0	0.179003	0	0.395248
Pallidium.caudal.R	0	0	0	0	-0.176966	0	0	0	0.135484	0.203792	0.377955	0.253932	0	0	0	0	0	-0.294599	0	0.133796	0.192303	0.136092	0.146008	0	0	-0.130147	0	0	0.135061	-0.30736	0.403392	0.202198	-0.164098	0	0	0	0.254933	0.192921	0.248519	0	0.425557	0.515603	0.381823	0.24785	0.267573	0.432959	0.399397	0.461031	0.184134
Nucleus Basalis of Meynert.L	0.22345	0.264381	0.132994	0.167607	0.15742	0.267376	0.196915	0.13284	0	0	0.301526	0.264732	0	0.147479	0	0	0.140616	0	0.624695	0.171414	0	0	0	0	0.220168	0.169159	0	-0.164195	0	0	0.350736	0.238848	0	-0.264456	0	0.224349	0.408029	0.182609	0	0	0.157966	0	0.228774	0	0.207271	0	0.162495	0	0.627117
Nucleus Basalis of Meynert.R	0.235992	0	0.279465	0	0.141948	0	0	0	0.227671	0	0	0	0	0	0	0	0	0	0.210433	0.158647	0.403048	0	-0.185622	0	0	0	0	0	0	0	0.165093	0	-0.279425	0	0	0	0	0.278952	0	0	0.308936	0.173658	0.357382	0.141409	0	0	0.142308	0.323577	0.143896
Thalamus.L	0.242393	0	0.178684	0	0	0	0	0	0	0.237762	0.322009	0.241847	-0.230687	-0.151646	0	0	0	-0.135611	0	0.276964	0.526179	0	0	0	-0.239969	0	0	0	0	-0.159478	0.3419	0.155877	0	-0.165278	0.193704	0	0.23149	0.151345	0.276431	0.400825	0.276987	0.139758	0	0	0	0	0.20636	0.237679	0
Thalamus.R	0.159243	0.17092	0	0	0	0.289228	0	-0.156017	0	0.216564	0	0	-0.185896	0	-0.156889	0.155722	0	0	0	0.244687	0.221157	0.230992	0	0	-0.161866	0	0	0	0	-0.140043	0.326789	0	-0.254267	0	0	0	0.185132	0.428602	0.251584	0.32072	0	0	0	0	0	0	0	0.316152	0
Hypothalamus.L	0.251123	0	0.13717	0	0	0	0	0	0	0.171724	0.460985	0	-0.341348	0	-0.192589	0.361078	0.192457	-0.264025	0.347998	0.189376	0.267225	0.138209	0	0	0	0	0.158753	0	0	-0.360166	0.588206	0.274246	0	-0.321315	0	0	0.538663	0.479378	0.457078	0.237646	0.511606	0.290549	0.254214	0	0.165103	0	0.244187	0	0.525024
Hypothalamus.R	0.359632	0	0.248527	0	0.220767	0.148804	0.198856	0	0.154493	0	0.407854	0	-0.377358	-0.170687	0	0.218109	0	-0.313397	0.333315	0	0.359888	0.260341	0	0	-0.233121	0	0.207204	0	0.159791	-0.383737	0.606237	0.284848	-0.191848	-0.217657	0	-0.145596	0.404973	0.411295	0.429047	0	0.507955	0.294915	0.403114	0	0.308387	0.178332	0.421685	0.16128	0.390412
Midbrain.L	0.190283	0	-0.16879	-0.254616	0	-0.193899	-0.20894	-0.267603	0	-0.320564	0	0.138785	-0.40497	-0.342905	0	0	0.135107	-0.167061	0	-0.173306	0	-0.156251	-0.192006	0	-0.258421	-0.241538	0.18124	0.198341	0.269202	0	0	0	0	0.184097	0	0.408199	0.237128	0	0	0	0	0	0	-0.213945	0	-0.142937	0.230795	0	0
Midbrain.R	0.147945	-0.198823	0	-0.219858	-0.138156	-0.27517	0	-0.166425	0	-0.246318	0	0	-0.489164	-0.277191	0	0	0.330318	-0.321577	0	-0.365166	0.147807	0	0	-0.201536	0	0	0.14828	-0.180482	0.215456	-0.268684	0	0	0.421971	0	0	0.341177	0.196432	0	-0.173492	0.204549	0	0	0	-0.197094	0	-0.130172	0	0	0
Colliculi.inferior.L	0	0.502423	-0.224016	-0.331239	-0.183487	-0.151132	-0.344544	0	-0.134192	-0.299216	-0.151565	-0.186878	-0.216731	0	-0.234087	0.178853	-0.167931	-0.16032	-0.316137	0	0	-0.185938	-0.166448	-0.171438	-0.219089	-0.29958	-0.309603	0	0.191312	0	0	-0.214979	-0.29996	0.19011	-0.134154	0	0	0	0.13564	0	0	0	-0.288628	0	-0.232589	-0.251427	0	0	0
Colliculi.inferior.R	-0.131715	0.344646	0	-0.167279	0	0	-0.191192	-0.329038	0	-0.20181	-0.182232	0	0	0	0	0	0	0	-0.323969	0	0	-0.151088	0	0	0	-0.280119	-0.275163	0	0	0	-0.207209	-0.277346	-0.256522	0	0	0	-0.175262	-0.216058	-0.286415	0	-0.212875	0	-0.287257	0	0	-0.153189	0	0	-0.173137
Colliculi.superior.L	-0.259305	-0.292986	0	0	-0.260366	-0.318076	0	0	-0.142918	0	-0.285834	0	0.345068	0.253808	0	0	0	0.476926	-0.233362	0	-0.294081	-0.307136	0	0.309457	0.200891	0	-0.203198	0.176176	-0.139314	0.448999	-0.238212	0	0.138861	0	0	0.314806	-0.34147	-0.464645	-0.131201	-0.201263	-0.344133	-0.266602	-0.176498	0	-0.324308	-0.204816	-0.316202	-0.135149	-0.400894
Colliculi.superior.R	-0.130762	-0.206957	0	0	-0.129597	0	-0.149707	-0.172596	-0.313568	-0.169854	-0.461773	-0.140405	0.287256	0.497183	0	0	0	0.461722	0	-0.185671	-0.158564	0	0	0.174423	0.278244	0.33709	0	0	-0.144653	0.384798	-0.164272	-0.2352	0	0	0	0.200303	-0.199172	-0.299914	0	0	-0.30102	-0.42003	-0.131845	0	-0.25309	-0.380855	-0.345566	-0.27233	-0.31196
MB.Reticular.nucleus.L	0	0.157453	0	0	0	0	0	-0.145526	0	-0.177426	0	0.171792	-0.157885	0	0	-0.246672	0	0	0	-0.191193	0	0	0	0	0	0	0	0	0	0	0	0	0.261015	0.230531	0	0.504571	0.197722	0	-0.192908	0	-0.245314	0	0	0	0.304438	0	0	0	0
MB.Reticular.nucleus.R	0	-0.149979	-0.28844	-0.250224	0	0	-0.321653	-0.177217	-0.225254	-0.374946	-0.273194	-0.217508	-0.208363	0	0	0	0.176432	0	0	-0.359943	-0.226921	0	-0.235305	0	0	0	0.268333	0	0.302578	0	-0.163801	-0.301906	0.302891	0.183064	0	0	0	0.187898	-0.248857	0.227193	-0.291321	-0.430771	-0.313255	-0.43618	-0.170283	-0.391969	0	-0.269971	0
Ventral.tegemental.area.L	0	0	0	0	-0.150655	0	0	0	0	0	0.25085	0.144282	-0.274636	-0.159703	0	0	0.270262	0	0.297829	0	0.204604	0	-0.200378	0	-0.154907	-0.149586	0	0	0.191247	-0.175756	0.421946	0	0	-0.392761	0	0	0.525103	0.278965	0.147337	0.256019	0.14718	0.161178	0	0	0	0	0.273616	0	0.340826
Ventral.tegmental.area.R	0.488211	0	0.283346	0	0.222059	0	0.132617	0	0.152019	0	0.227912	0	-0.41138	-0.250359	0	0.265153	0.194006	-0.161955	0.353597	0	0.255196	0	-0.332153	0	0	0	0.269056	0	0.277119	-0.315216	0.426124	0.146176	0	0	0.181634	0.252731	0.394755	0.339926	0.163932	0	0.206057	0	0.237058	0	0.224843	0	0.26061	0.181662	0.339933
Periaqueductal.grey.L	0	0.17503	-0.241148	0	-0.142376	0	0	0	0	-0.341638	-0.2802	-0.164052	0	0.194207	0	-0.152754	0	0	0	0	-0.16075	-0.14325	-0.148289	0	0	-0.192287	-0.163939	0	0	-0.175559	0	-0.175232	0.185052	0.161874	-0.143907	0.265584	0.148376	0	-0.186424	0	-0.32797	-0.168932	-0.154867	0	0	-0.180157	0	-0.158589	0.147852
Periaqueductal.grey.R	-0.255667	0.240512	-0.40607	-0.159758	-0.184507	0	-0.330618	-0.164336	-0.317325	-0.422311	-0.516737	-0.349706	0.22292	0.443714	0	0	0	0.187386	0	0	-0.503071	-0.26177	0	0	0	0	-0.156167	0.231551	0	0.303575	-0.14073	-0.300792	0	0.146415	0	0	-0.245837	0	-0.177957	0	-0.396042	-0.478332	-0.183425	-0.210115	-0.472143	-0.4107	-0.204953	-0.20312	0
Hindbrain.L	-0.585694	-0.236084	-0.480748	-0.275006	-0.367864	-0.250254	-0.441831	0	-0.346454	-0.20201	-0.333904	-0.32656	0	0	0	-0.304847	-0.21813	0	-0.385462	-0.151461	-0.266933	0.161957	0	0	-0.189913	-0.204873	-0.212502	-0.145179	-0.159489	0	-0.513549	-0.515685	-0.13619	-0.13607	-0.30285	-0.338814	-0.316847	0	-0.421813	0	-0.266328	-0.361948	-0.38842	-0.299099	-0.172572	0	0	-0.233614	-0.370731
Hindbrain.R	-0.641449	-0.373914	-0.436412	-0.317593	-0.449759	-0.348683	-0.438884	-0.22948	-0.388087	-0.26526	-0.253508	-0.183586	0	0	0	0	0	0.178325	-0.387618	-0.205282	-0.356454	0.144943	0.212812	0	0	-0.170086	-0.294204	0	-0.331523	0.212117	-0.566911	-0.449469	0	0	0	0	-0.313332	-0.219361	-0.407225	0	-0.197558	-0.342688	-0.179736	-0.33685	0	0	0	-0.249044	-0.283845
Parabrachial.nucleus.L	0	0	0	0.134766	-0.252242	-0.21036	0	0	0	0	0	0.140326	-0.243677	-0.307161	0	-0.130408	-0.204002	-0.133528	-0.20567	0	0	0	0	-0.181647	-0.325436	-0.283401	-0.209947	0	0	0	0	0	0	0.141837	0	0.145014	0	0	-0.143043	0.18476	0	0	-0.150909	0	0	-0.158328	0.338091	0.239259	0
Parabrachial.nucleus.R	-0.194978	0	-0.161624	-0.152206	-0.180343	-0.171638	-0.194469	0	-0.362787	-0.229657	0.237234	0.216009	0	0	0.140048	-0.278609	0.143911	-0.137185	0	-0.188492	0	0	0	-0.180129	0	-0.320944	0	0	0	0	-0.250256	-0.140964	0.313353	0.161844	-0.224697	0	-0.184969	-0.413104	-0.221489	-0.129554	0	0	0	0	0	0	0	0	0
[truncated: 27 more columns]
