# Supplementary material for: The amygdala instructs insular feedback for affective learning
Source: eLife. 2020 Nov 20;9:e60336. doi: 10.7554/eLife.60336 (PMC7679142; doi:10.7554/eLife.60336)
Supplement: Figure 4—source data 1. [file elife-60336-fig4-data1.xlsx]

## Sheet: Panel Dii
	aIC																																		pIC
peri-laser time (ms)	405nm											470nm											470nm-TZP												405nm												470nm
-50	-0.01884	-0.0246	0.014709	0.018061	0.003262	0.034115	-0.00144	0.012727	0.031189	0.02351	0.03362	-0.01955	-0.02512	0.005886	0.008291	0.006959	0.025052	0.002973	0.031184	0.026087	0.018772	0.030025	-0.02767	-0.03534	-2.3e-05	-0.0119	0.001706	0.024993	-0.00195	0.024864	0.016556	0.008691	0.027342		-0.01122	0.015383	0.026632	0.019195	0.029195	0.016381	0.013693	0.018366	0.003356	0.039301	0.038307	0.047601	-0.01607	0.009198	0.019654
-49	-0.02203	-0.02786	0.011828	0.014813	-0.000405	0.030408	-0.00527	0.008775	0.027382	0.019586	0.02926	-0.01861	-0.02425	0.007296	0.009389	0.004704	0.025842	0.00036	0.028302	0.026261	0.019085	0.028175	-0.02817	-0.03652	-0.000984	-0.01347	0.004609	0.029656	0.001868	0.026279	0.018768	0.010858	0.029788		-0.01357	0.012926	0.024323	0.01725	0.02585	0.015689	0.012729	0.016831	0.001228	0.037873	0.036634	0.046253	-0.01773	0.008492	0.018127
-48	-0.02664	-0.03263	0.006949	0.009984	-0.00335	0.029198	-0.00875	0.005474	0.026072	0.018351	0.024581	-0.01838	-0.02413	0.007038	0.009532	-0.000385	0.022946	-0.00427	0.022968	0.022961	0.01589	0.02346	-0.03129	-0.03991	-0.00404	-0.01742	0.006262	0.033083	0.003692	0.027116	0.020143	0.012119	0.030864		-0.01499	0.010791	0.022801	0.015889	0.024228	0.016195	0.011766	0.015913	-0.000111	0.036396	0.034912	0.045613	-0.01958	0.006194	0.0164
-47	-0.03141	-0.03763	0.001769	0.005124	-0.00488	0.030254	-0.01061	0.003976	0.026522	0.018971	0.022326	-0.01964	-0.02549	0.005018	0.00779	-0.00342	0.021514	-0.00694	0.019949	0.021654	0.014515	0.02049	-0.02794	-0.03575	0.000218	-0.01328	0.005274	0.033782	0.003201	0.025786	0.019742	0.011682	0.030234		-0.0161	0.009148	0.021551	0.014903	0.023468	0.017748	0.011919	0.016348	0.00081	0.036423	0.03474	0.046052	-0.02083	0.002819	0.014842
-46	-0.03655	-0.04273	-0.00338	-0.000499	-0.00548	0.032091	-0.01111	0.003138	0.02811	0.020702	0.021614	-0.02109	-0.02681	0.003608	0.007005	-0.0056	0.021341	-0.00937	0.017774	0.021615	0.014248	0.018545	-0.02607	-0.03308	0.003111	-0.00992	0.006362	0.035362	0.004165	0.026263	0.021318	0.013269	0.031175		-0.01991	0.005216	0.018047	0.011168	0.020294	0.020884	0.014694	0.019043	0.00355	0.039421	0.037575	0.048621	-0.02004	0.001297	0.015252
-45	-0.03809	-0.0441	-0.00507	-0.00211	-0.00678	0.033393	-0.01217	0.001047	0.029515	0.022092	0.020227	-0.02186	-0.02761	0.003571	0.006965	-0.00804	0.019985	-0.01224	0.01541	0.020149	0.012782	0.016047	-0.0234	-0.03097	0.005731	-0.00741	0.008476	0.037007	0.004923	0.028097	0.023399	0.015334	0.032036		-0.02337	0.002318	0.014985	0.007285	0.017931	0.022768	0.016679	0.020482	0.004343	0.041248	0.039875	0.049878	-0.01725	0.004066	0.018059
-44	-0.03262	-0.0386	-0.000348	0.003381	-0.00816	0.033862	-0.01305	-0.000615	0.029706	0.022164	0.01906	-0.02137	-0.02721	0.00439	0.007441	-0.0061	0.022762	-0.01054	0.017174	0.022421	0.015144	0.017833	-0.02224	-0.03122	0.006005	-0.00796	0.008176	0.036186	0.003562	0.028163	0.023566	0.015238	0.03137		-0.0226	0.004254	0.01593	0.008263	0.019767	0.022683	0.017412	0.020499	0.003654	0.040857	0.04059	0.049431	-0.01373	0.008088	0.022016
-43	-0.02779	-0.0337	0.00421	0.00769	-0.0067	0.035621	-0.01161	0.001108	0.030936	0.023304	0.020344	-0.02105	-0.02683	0.00472	0.00769	-0.00532	0.02387	-0.00961	0.017991	0.023148	0.015899	0.019033	-0.02375	-0.03352	0.003922	-0.01124	0.012689	0.038657	0.007531	0.033437	0.026697	0.018151	0.035328		-0.0204	0.005012	0.017659	0.010152	0.020604	0.02153	0.017501	0.020171	0.003273	0.040067	0.040759	0.048409	-0.01194	0.010372	0.023802
-42	-0.02982	-0.03576	0.002586	0.00564	-0.00453	0.037089	-0.00938	0.004032	0.031905	0.024387	0.021829	-0.019	-0.02474	0.006444	0.00915	-0.00318	0.023875	-0.00771	0.020181	0.023189	0.015947	0.021226	-0.02279	-0.03351	0.005015	-0.01133	0.018493	0.042395	0.013466	0.040004	0.030667	0.022172	0.040523		-0.02131	0.003378	0.016522	0.008679	0.01879	0.020448	0.016359	0.019561	0.003489	0.038765	0.040097	0.047169	-0.00931	0.012673	0.025999
-41	-0.03021	-0.03621	0.002485	0.005615	-0.00268	0.037091	-0.00739	0.006163	0.031681	0.024357	0.023235	-0.01963	-0.02544	0.005239	0.007642	0.00377	0.027537	-0.00124	0.027592	0.027299	0.020135	0.027632	-0.02337	-0.03467	0.004098	-0.01247	0.016133	0.039989	0.011794	0.037925	0.028468	0.020208	0.037974		-0.02116	0.005365	0.017287	0.009323	0.019588	0.018145	0.013724	0.017292	0.002058	0.036292	0.037958	0.044832	-0.01078	0.010162	0.024357
-40	-0.02795	-0.03397	0.004373	0.007372	0.001395	0.038619	-0.00355	0.010265	0.033192	0.025829	0.026945	-0.02218	-0.02804	0.002697	0.004777	0.007299	0.028247	0.001578	0.031241	0.028668	0.021504	0.030543	-0.03188	-0.04284	-0.00363	-0.02046	0.011521	0.037446	0.007858	0.032964	0.026344	0.018276	0.034029		-0.02122	0.00739	0.017988	0.010588	0.021081	0.017327	0.012937	0.016557	0.001734	0.036281	0.038201	0.044378	-0.0139	0.0076	0.021216
-39	-0.02732	-0.0335	0.004508	0.00822	0.003763	0.03783	-0.00137	0.013164	0.032094	0.024597	0.028481	-0.02078	-0.02672	0.004367	0.006399	0.007002	0.0251	0.001251	0.030781	0.02587	0.018669	0.030105	-0.03427	-0.04426	-0.00551	-0.02274	0.011249	0.040726	0.007826	0.031993	0.029622	0.02143	0.033972		-0.02263	0.006984	0.016819	0.010454	0.021758	0.015603	0.012061	0.014992	0.000743	0.036041	0.038105	0.043065	-0.01303	0.010241	0.022271
-38	-0.02976	-0.03588	0.002061	0.006791	0.006894	0.038175	0.001396	0.016465	0.032189	0.024767	0.030555	-0.01646	-0.0223	0.008817	0.011496	0.00757	0.023854	0.002678	0.031297	0.025191	0.017849	0.03141	-0.02899	-0.03821	0.000293	-0.01811	0.01099	0.04421	0.007513	0.03057	0.031798	0.023318	0.032956		-0.02291	0.00769	0.016229	0.010101	0.023864	0.014405	0.012179	0.01444	0.000532	0.03653	0.038022	0.041893	-0.00898	0.014783	0.026593
-37	-0.03311	-0.03893	-0.000721	0.003469	0.008675	0.037817	0.002559	0.018236	0.032253	0.025064	0.03174	-0.01487	-0.02058	0.010119	0.0131	0.007173	0.024802	0.00265	0.031023	0.026422	0.019007	0.031597	-0.03335	-0.04253	-0.00322	-0.02291	0.011513	0.045736	0.008514	0.029679	0.032118	0.023705	0.032812		-0.02243	0.009408	0.016371	0.009883	0.026424	0.013904	0.011077	0.014022	-0.000372	0.035618	0.036471	0.04112	-0.00753	0.015685	0.027985
-36	-0.03465	-0.0404	-0.0018	0.001664	0.008385	0.036598	0.002145	0.018214	0.031615	0.024419	0.031276	-0.01403	-0.01966	0.010888	0.013823	0.007695	0.028064	0.003045	0.031998	0.029384	0.022053	0.032155	-0.03533	-0.04458	-0.00471	-0.02416	0.014257	0.04799	0.011286	0.031567	0.033529	0.025369	0.034557		-0.01947	0.012056	0.019278	0.012644	0.028554	0.013846	0.009373	0.013436	-0.00157	0.03364	0.034313	0.04055	-0.00532	0.016973	0.029946
-35	-0.03457	-0.04043	-0.00166	0.001233	0.006957	0.03554	0.001297	0.017201	0.030735	0.02321	0.030465	-0.0149	-0.02055	0.009407	0.011992	0.01081	0.032889	0.005847	0.035302	0.033934	0.026672	0.03482	-0.03176	-0.04074	-0.0011	-0.01974	0.017396	0.051533	0.01348	0.033457	0.035445	0.027217	0.036324		-0.01592	0.014227	0.023068	0.016513	0.029711	0.011926	0.006784	0.011085	-0.0037	0.031157	0.031584	0.038299	-0.00622	0.014538	0.028656
-34	-0.03531	-0.04128	-0.00205	0.000728	0.006087	0.035039	0.000544	0.016276	0.030485	0.022812	0.030576	-0.01809	-0.02372	0.00592	0.008021	0.012729	0.033761	0.007548	0.036958	0.034944	0.02767	0.036281	-0.03581	-0.04511	-0.00536	-0.02412	0.014692	0.050126	0.010172	0.029763	0.032476	0.024258	0.033126		-0.01595	0.013257	0.022964	0.016674	0.028216	0.009066	0.003587	0.007836	-0.00641	0.028877	0.028951	0.034947	-0.01029	0.00947	0.024824
-33	-0.03621	-0.04213	-0.00302	-0.000464	0.004263	0.03373	-0.00114	0.014297	0.029533	0.022062	0.029962	-0.01986	-0.02555	0.004221	0.00661	0.011696	0.029558	0.007025	0.036163	0.030863	0.023581	0.035507	-0.04234	-0.0523	-0.01176	-0.03085	0.011703	0.048307	0.00778	0.027452	0.030581	0.022249	0.030931		-0.01937	0.008923	0.019721	0.01279	0.02424	0.007722	0.001765	0.005914	-0.00776	0.027497	0.027277	0.033105	-0.01203	0.007189	0.023294
-32	-0.03173	-0.03758	0.001291	0.003864	-0.000224	0.031521	-0.00552	0.010381	0.027674	0.020305	0.026161	-0.01692	-0.02275	0.007599	0.010184	0.011109	0.026332	0.006891	0.03584	0.027366	0.020113	0.035246	-0.04431	-0.0538	-0.01296	-0.03139	0.010865	0.045815	0.006731	0.027585	0.029323	0.02076	0.029952		-0.01794	0.010796	0.021556	0.014157	0.026398	0.00737	0.002373	0.005056	-0.0077	0.028055	0.027515	0.032552	-0.00883	0.010489	0.026593
-31	-0.0288	-0.03478	0.003988	0.006518	-0.00702	0.029211	-0.01265	0.004397	0.025591	0.018192	0.01924	-0.01683	-0.0228	0.007618	0.010017	0.011939	0.026916	0.007591	0.036537	0.027469	0.020278	0.036174	-0.04703	-0.05602	-0.01521	-0.03331	0.009306	0.041956	0.004507	0.026681	0.026323	0.017566	0.027547		-0.01857	0.011224	0.021008	0.013691	0.025931	0.007054	0.003047	0.004396	-0.00745	0.029083	0.028082	0.032614	-0.00735	0.011359	0.028119
-30	-0.02483	-0.03087	0.007808	0.010253	-0.01173	0.027494	-0.01763	0.000126	0.024023	0.016505	0.01468	-0.01881	-0.02491	0.005611	0.007722	0.013239	0.027245	0.008094	0.037197	0.027674	0.020576	0.037392	-0.04728	-0.05634	-0.0155	-0.03347	0.008298	0.040728	0.00352	0.025673	0.025701	0.017121	0.026869		-0.01705	0.013455	0.022573	0.015194	0.026971	0.007569	0.003171	0.004455	-0.00688	0.030079	0.028564	0.03337	-0.00765	0.010455	0.02721
-29	-0.02532	-0.03133	0.007521	0.010109	-0.01212	0.025434	-0.01764	-0.000387	0.022496	0.014793	0.015186	-0.01842	-0.02455	0.006105	0.008199	0.012042	0.026611	0.006549	0.035941	0.027001	0.019875	0.036487	-0.04389	-0.053	-0.01189	-0.03041	0.007101	0.039673	0.003059	0.024849	0.025366	0.017033	0.026114		-0.01888	0.011178	0.020608	0.013064	0.025049	0.00914	0.003638	0.00553	-0.00647	0.030653	0.029039	0.034551	-0.00749	0.011384	0.026821
-28	-0.02681	-0.03273	0.006229	0.008915	-0.01012	0.023819	-0.01538	0.001965	0.021285	0.013561	0.017259	-0.01919	-0.0252	0.004847	0.006997	0.006892	0.024446	0.001467	0.031074	0.024877	0.017568	0.032184	-0.0518	-0.0607	-0.02022	-0.03846	0.009101	0.040164	0.006163	0.027963	0.026015	0.017654	0.028128		-0.01897	0.010112	0.020352	0.012401	0.024518	0.009221	0.003416	0.005327	-0.00789	0.030005	0.028538	0.033986	-0.00999	0.01157	0.024449
-27	-0.02663	-0.03246	0.006262	0.008924	-0.00844	0.023106	-0.01367	0.005606	0.02058	0.012949	0.018278	-0.02378	-0.02959	0.000417	0.00306	0.00235	0.023413	-0.00293	0.026514	0.024321	0.016864	0.028419	-0.04779	-0.05643	-0.01655	-0.03341	0.009492	0.038393	0.006792	0.029128	0.024548	0.01617	0.02826		-0.01666	0.011004	0.022395	0.013965	0.025928	0.007529	0.00206	0.003656	-0.00941	0.028196	0.027271	0.032235	-0.01284	0.009723	0.022066
-26	-0.03049	-0.03622	0.003174	0.005981	-0.00924	0.019935	-0.01464	0.006066	0.017411	0.009839	0.016945	-0.0267	-0.03243	-0.00225	0.000996	-0.00156	0.022722	-0.00668	0.022157	0.024421	0.016874	0.024808	-0.03896	-0.04757	-0.00757	-0.02264	0.009433	0.035937	0.006137	0.028688	0.022953	0.014691	0.028323		-0.01849	0.009568	0.020374	0.012501	0.024991	0.003881	-0.00148	-0.000104	-0.01202	0.025115	0.023834	0.02854	-0.01363	0.008209	0.021787
-25	-0.03678	-0.04228	-0.00291	-0.000346	-0.01009	0.017009	-0.01565	0.005065	0.014923	0.007231	0.015832	-0.02645	-0.03221	-0.00222	0.000671	-0.00176	0.024701	-0.00719	0.021135	0.027206	0.019592	0.02434	-0.04294	-0.05129	-0.01121	-0.02488	0.006891	0.031407	0.002495	0.025474	0.019455	0.011246	0.026037		-0.02155	0.008249	0.017499	0.010172	0.02307	0.001164	-0.00486	-0.00312	-0.01302	0.023003	0.020538	0.025405	-0.01322	0.008122	0.022275
-24	-0.03853	-0.04408	-0.00536	-0.00281	-0.01039	0.015038	-0.01649	0.004082	0.013977	0.006261	0.015623	-0.02209	-0.02795	0.001947	0.004597	-0.00137	0.02733	-0.00686	0.021266	0.030176	0.022615	0.025029	-0.05175	-0.05941	-0.01918	-0.03257	0.002828	0.027454	-0.00195	0.021198	0.016884	0.008617	0.022834		-0.02369	0.006774	0.015552	0.008207	0.021313	0.00032	-0.00731	-0.0041	-0.01247	0.021404	0.018141	0.024485	-0.00971	0.011717	0.025874
-23	-0.03654	-0.04225	-0.00373	-0.000629	-0.0116	0.013419	-0.01793	0.002881	0.013004	0.005317	0.014856	-0.0184	-0.02433	0.005851	0.0084	-8.33e-05	0.030444	-0.00535	0.022978	0.033011	0.025558	0.02684	-0.04881	-0.0563	-0.01598	-0.0289	0.001017	0.027414	-0.00397	0.019345	0.018237	0.009849	0.02137		-0.02583	0.004612	0.013714	0.006207	0.019832	0.000243	-0.0085	-0.00414	-0.01163	0.020673	0.016869	0.02466	-0.0071	0.014585	0.028654
-22	-0.0368	-0.04257	-0.00373	0.000102	-0.01032	0.013862	-0.01646	0.004223	0.013391	0.005769	0.016596	-0.0169	-0.02289	0.007728	0.010383	-0.000536	0.031302	-0.00584	0.022961	0.033438	0.026032	0.026583	-0.0492	-0.05704	-0.01682	-0.02834	0.001938	0.03005	-0.00244	0.021202	0.021453	0.012951	0.022871		-0.02843	0.001363	0.011029	0.003415	0.017101	0.000644	-0.00856	-0.00339	-0.01127	0.021058	0.016595	0.025499	-0.00681	0.015342	0.028903
-21	-0.03873	-0.04451	-0.00535	-0.00141	-0.00544	0.017736	-0.01166	0.009019	0.016999	0.009323	0.02139	-0.01195	-0.01796	0.013258	0.016279	-0.000603	0.033053	-0.00599	0.023092	0.035076	0.027659	0.026726	-0.05254	-0.06056	-0.02107	-0.03074	5.11e-05	0.030146	-0.00297	0.020092	0.021018	0.012539	0.021892		-0.03222	-0.00297	0.00734	-0.0005	0.012599	0.003994	-0.00527	-0.000524	-0.00876	0.024228	0.019413	0.028325	-0.00278	0.019887	0.032858
-20	-0.04023	-0.04596	-0.00717	-0.00377	-0.00316	0.0197	-0.00974	0.011467	0.01886	0.0112	0.023454	-0.01017	-0.01617	0.015258	0.018272	-2.06e-05	0.035711	-0.00557	0.023154	0.037876	0.030468	0.026883	-0.05119	-0.0591	-0.02024	-0.02805	-0.00333	0.028291	-0.00584	0.016237	0.018383	0.010166	0.018894		-0.03529	-0.00562	0.004354	-0.00353	0.009069	0.005474	-0.00335	0.000509	-0.00803	0.025217	0.021265	0.02937	-0.000415	0.022456	0.035291
-19	-0.04012	-0.04558	-0.00749	-0.0042	-0.00434	0.018415	-0.01095	0.010904	0.018019	0.010561	0.021845	-0.01252	-0.01839	0.012734	0.015401	0.000707	0.037981	-0.00512	0.023243	0.040393	0.033043	0.026971	-0.04861	-0.05625	-0.01729	-0.02401	-0.00244	0.03007	-0.0048	0.016567	0.019381	0.01131	0.019615		-0.03598	-0.00597	0.003584	-0.00387	0.008472	0.003918	-0.00519	-0.000795	-0.00931	0.022912	0.020034	0.027938	-0.00147	0.02169	0.034358
-18	-0.03961	-0.04492	-0.00703	-0.0035	-0.00499	0.017514	-0.01122	0.011445	0.017771	0.010483	0.021293	-0.01272	-0.01851	0.011759	0.013869	0.001569	0.039416	-0.0041	0.024353	0.041582	0.03438	0.027676	-0.04845	-0.05592	-0.01662	-0.0221	-0.00357	0.02945	-0.00578	0.016436	0.018015	0.009951	0.018319		-0.03494	-0.00445	0.004558	-0.0026	0.010051	0.000811	-0.0077	-0.0034	-0.01157	0.020413	0.017685	0.025285	-0.000287	0.022532	0.035855
-17	-0.03918	-0.0446	-0.00643	-0.0028	-0.00455	0.01824	-0.01027	0.012566	0.018953	0.011669	0.022443	-0.01384	-0.01966	0.010637	0.012704	0.000544	0.037587	-0.00436	0.024478	0.03955	0.032361	0.026925	-0.04517	-0.05266	-0.01389	-0.01769	-0.0087	0.026164	-0.0102	0.012995	0.015073	0.006762	0.014151		-0.03424	-0.00324	0.00513	-0.00184	0.011222	-0.00196	-0.00935	-0.00587	-0.01354	0.018425	0.016009	0.022685	0.002224	0.02416	0.038309
-16	-0.03721	-0.04279	-0.00389	-2.47e-05	-0.00452	0.018539	-0.00946	0.012973	0.019325	0.011928	0.022991	-0.01909	-0.02484	0.006326	0.008516	0.001174	0.036688	-0.00317	0.025887	0.038135	0.03086	0.027863	-0.04518	-0.05188	-0.01445	-0.01677	-0.01441	0.02156	-0.01557	0.007832	0.012379	0.004043	0.009877		-0.03232	-0.00142	0.007035	0.000597	0.01294	-0.0039	-0.0114	-0.00835	-0.01485	0.016377	0.014118	0.020656	0.00065	0.023062	0.036395
-15	-0.03614	-0.04163	-0.00215	0.001479	-0.00742	0.015559	-0.01206	0.010098	0.016299	0.008868	0.020341	-0.02214	-0.02781	0.003789	0.005761	0.003266	0.036742	-0.00129	0.027678	0.037757	0.030604	0.030207	-0.04593	-0.0518	-0.01535	-0.01648	-0.01473	0.019867	-0.01651	0.007378	0.012438	0.004273	0.009723		-0.02991	0.000698	0.009468	0.00316	0.015143	-0.00728	-0.0144	-0.01202	-0.01749	0.013444	0.011398	0.0175	-0.000717	0.022138	0.034781
-14	-0.03391	-0.03937	0.000262	0.003731	-0.00986	0.014132	-0.01444	0.007797	0.014848	0.007482	0.018301	-0.02459	-0.03029	0.001432	0.002908	0.004447	0.036888	-0.000633	0.027798	0.037632	0.030482	0.031738	-0.04409	-0.04992	-0.01326	-0.01391	-0.01389	0.019481	-0.01603	0.009102	0.012784	0.004641	0.010868		-0.02535	0.00433	0.013965	0.007152	0.019065	-0.00855	-0.01587	-0.01292	-0.01715	0.012242	0.009766	0.016522	-0.00472	0.0184	0.030792
-13	-0.03364	-0.03908	0.000448	0.003786	-0.01126	0.014927	-0.01571	0.006377	0.015814	0.00848	0.017991	-0.02742	-0.03322	-0.00165	0.000302	0.00447	0.036837	-0.000841	0.026721	0.037669	0.030432	0.032159	-0.04455	-0.04984	-0.01276	-0.0132	-0.01515	0.017553	-0.01682	0.009719	0.011565	0.003267	0.010395		-0.0214	0.007167	0.017787	0.010593	0.022062	-0.00706	-0.01536	-0.01135	-0.01453	0.013414	0.009919	0.017875	-0.00986	0.012283	0.025034
-12	-0.03145	-0.03693	0.00245	0.006139	-0.01359	0.013856	-0.0184	0.003397	0.01505	0.007643	0.016301	-0.02678	-0.03251	-0.00115	0.001948	0.001794	0.035668	-0.00342	0.023542	0.036699	0.029489	0.029607	-0.0424	-0.04713	-0.01009	-0.00924	-0.0132	0.018988	-0.01422	0.013003	0.014222	0.005889	0.013244		-0.01619	0.011596	0.022686	0.015165	0.026832	-0.00631	-0.01441	-0.01054	-0.0131	0.014915	0.01072	0.018671	-0.01259	0.007862	0.021759
-11	-0.02983	-0.03524	0.004449	0.008197	-0.01682	0.01158	-0.02224	5.21e-06	0.012937	0.005483	0.01344	-0.02638	-0.03212	-0.000786	0.002728	-0.00202	0.032671	-0.00704	0.01986	0.033583	0.026461	0.025752	-0.04359	-0.04791	-0.01147	-0.00907	-0.01253	0.020151	-0.01286	0.015033	0.016892	0.008702	0.014853		-0.01323	0.015338	0.025948	0.018226	0.030335	-0.00797	-0.01558	-0.01194	-0.01423	0.013802	0.009268	0.017518	-0.01674	0.001398	0.017414
-10	-0.0289	-0.0343	0.005479	0.009322	-0.01839	0.012979	-0.02401	-0.00101	0.013941	0.006405	0.012079	-0.02356	-0.02945	0.001968	0.004926	-0.00466	0.029786	-0.00978	0.017535	0.030322	0.023253	0.022615	-0.04505	-0.05006	-0.01352	-0.01105	-0.00846	0.024048	-0.00912	0.019803	0.021557	0.013595	0.019164		-0.01154	0.018458	0.028101	0.020192	0.03381	-0.00845	-0.01605	-0.01279	-0.01402	0.013251	0.008061	0.016825	-0.01751	-0.000524	0.016957
-9	-0.02576	-0.03132	0.00791	0.012212	-0.0176	0.016268	-0.02324	0.000219	0.01712	0.009624	0.013152	-0.02018	-0.02611	0.00551	0.007931	-0.00773	0.026051	-0.01324	0.015237	0.026177	0.019229	0.019006	-0.04083	-0.04594	-0.00966	-0.00656	-0.0068	0.024983	-0.00914	0.020855	0.02273	0.014904	0.019899		-0.00911	0.02048	0.030775	0.022687	0.036579	-0.00614	-0.01503	-0.01187	-0.01174	0.014611	0.008778	0.017987	-0.01462	0.003703	0.02053
-8	-0.02261	-0.02842	0.010868	0.01583	-0.01521	0.01895	-0.02076	0.002234	0.020303	0.01291	0.016298	-0.02155	-0.02752	0.004245	0.006632	-0.00912	0.021551	-0.01529	0.014027	0.02156	0.01475	0.016737	-0.03801	-0.04321	-0.00705	-0.00305	-0.00948	0.022908	-0.01258	0.017495	0.020554	0.012658	0.016944		-0.00707	0.022278	0.032526	0.024689	0.038043	-0.00162	-0.01176	-0.00829	-0.00813	0.018705	0.012642	0.021893	-0.01444	0.005371	0.021215
-7	-0.02284	-0.02881	0.011231	0.01593	-0.01231	0.021256	-0.01772	0.005291	0.023243	0.015889	0.019502	-0.02172	-0.02775	0.003717	0.00624	-0.00606	0.020826	-0.0128	0.016809	0.020883	0.013888	0.018457	-0.03418	-0.04052	-0.00404	-0.000115	-0.01162	0.022473	-0.01424	0.015333	0.020415	0.012412	0.01604		-0.00743	0.021605	0.032164	0.024335	0.036196	0.003409	-0.00684	-0.00341	-0.00406	0.024295	0.018167	0.026721	-0.01241	0.006854	0.022777
-6	-0.02414	-0.03006	0.010512	0.014631	-0.01162	0.02182	-0.01731	0.006724	0.024113	0.016698	0.019611	-0.01788	-0.02385	0.007132	0.009969	-0.0053	0.020281	-0.01254	0.017354	0.020627	0.0135	0.018537	-0.0327	-0.03977	-0.00401	9.24e-06	-0.01695	0.021443	-0.01913	0.010577	0.021015	0.013054	0.011924		-0.00859	0.019831	0.031229	0.023458	0.03409	0.007875	-0.00177	0.000844	0.000519	0.029584	0.023205	0.031386	-0.00607	0.01308	0.028408
-5	-0.02311	-0.02885	0.011113	0.015459	-0.01516	0.019678	-0.0211	0.004426	0.021999	0.014455	0.015828	-0.01457	-0.02035	0.010241	0.012653	-0.00543	0.019794	-0.01238	0.017255	0.020343	0.013278	0.018802	-0.02864	-0.03693	-0.00221	0.001823	-0.0204	0.0228	-0.02226	0.007807	0.024347	0.016479	0.009037		-0.00863	0.019075	0.03113	0.023554	0.033107	0.010845	0.001888	0.003518	0.003983	0.033015	0.026045	0.034419	-0.0023	0.017728	0.032043
-4	-0.02259	-0.02812	0.011215	0.015691	-0.02032	0.01754	-0.02637	0.000622	0.019886	0.012254	0.011124	-0.01417	-0.02004	0.010388	0.012667	-0.00392	0.020578	-0.01064	0.018852	0.021378	0.014265	0.02063	-0.02249	-0.03192	0.002766	0.006974	-0.02103	0.024461	-0.02282	0.006056	0.025945	0.018042	0.008491		-0.00962	0.016642	0.029748	0.02179	0.030433	0.012965	0.005536	0.005619	0.00667	0.037032	0.029328	0.036688	-0.00151	0.018008	0.033189
-3	-0.02161	-0.02724	0.012207	0.01627	-0.02288	0.016393	-0.02883	-0.00172	0.019025	0.011458	0.00947	-0.01223	-0.01833	0.012227	0.014342	-0.00383	0.021071	-0.01009	0.019283	0.022004	0.014805	0.020851	-0.02726	-0.03668	-0.00162	0.003323	-0.01898	0.026631	-0.0207	0.006487	0.026553	0.018567	0.010447		-0.01003	0.01603	0.029368	0.020966	0.029904	0.015731	0.009861	0.008942	0.01061	0.042091	0.03398	0.040033	0.001667	0.01963	0.036424
-2	-0.01885	-0.02471	0.014932	0.01869	-0.02031	0.018358	-0.02612	0.000933	0.021409	0.013869	0.012875	-0.01203	-0.01814	0.012786	0.014737	-0.0065	0.020534	-0.01276	0.016309	0.021204	0.014015	0.018005	-0.026	-0.03528	-0.000297	0.005281	-0.01811	0.026686	-0.01988	0.006931	0.025943	0.017815	0.011156		-0.00953	0.01737	0.029955	0.021778	0.0313	0.020316	0.015342	0.014581	0.016964	0.047766	0.039716	0.045312	0.002943	0.020197	0.037884
-1	-0.01599	-0.02189	0.01736	0.020394	-0.01948	0.01843	-0.02529	0.002253	0.021626	0.01415	0.013996	-0.01303	-0.0191	0.011975	0.013857	-0.01247	0.01905	-0.01898	0.009995	0.019157	0.011909	0.01216	-0.02351	-0.03354	0.001294	0.007663	-0.01777	0.025616	-0.01893	0.00888	0.026642	0.01843	0.013656		-0.00884	0.018479	0.030593	0.022722	0.032421	0.0215	0.017207	0.015903	0.019944	0.049009	0.04133	0.046998	0.000669	0.01893	0.035996
0	-0.01514	-0.02084	0.01805	0.020402	-0.01923	0.01953	-0.02484	0.002995	0.022964	0.015625	0.014406	-0.01594	-0.0219	0.009042	0.011267	-0.01748	0.01804	-0.02425	0.004579	0.018178	0.010854	0.007537	-0.02615	-0.03602	-0.00299	0.003059	-0.01629	0.026485	-0.01695	0.01197	0.02965	0.021436	0.017534		-0.01006	0.017727	0.02969	0.021888	0.032788	0.021621	0.017203	0.015479	0.021186	0.048541	0.041268	0.047155	-0.00332	0.015796	0.032109
1	-0.01445	-0.02001	0.018239	0.020531	-0.01776	0.022325	-0.02326	0.004795	0.025953	0.01867	0.0157	-0.01499	-0.02102	0.010036	0.012523	-0.02024	0.018051	-0.02697	0.001068	0.018287	0.011055	0.005481	-0.02771	-0.03701	-0.00619	-1.14e-05	-0.01427	0.029328	-0.01436	0.014496	0.033034	0.025066	0.020048		-0.01176	0.016294	0.028316	0.020102	0.033105	0.021912	0.016947	0.016975	0.022626	0.048371	0.040707	0.047532	-0.00413	0.015386	0.031262
2	-0.00954	-0.01512	0.022408	0.025336	-0.0151	0.024495	-0.02078	0.006862	0.028356	0.021183	0.01803	-0.0083	-0.01431	0.016929	0.019695	-0.01511	0.024857	-0.02173	0.005693	0.025001	0.018058	0.010491	-0.02377	-0.03317	-0.00402	0.002903	-0.01293	0.031898	-0.01246	0.015922	0.034554	0.026976	0.020293		-0.00877	0.019659	0.031416	0.022405	0.036732	0.019827	0.014576	0.019158	0.023025	0.046478	0.03758	0.045934	-0.00447	0.016646	0.030894
3	-0.00665	-0.0124	0.024659	0.028075	-0.01426	0.023717	-0.01987	0.00719	0.028075	0.020928	0.018692	-0.00927	-0.01523	0.01569	0.019036	-0.00413	0.033421	-0.01156	0.016434	0.034073	0.027366	0.020305	-0.01768	-0.02712	0.00051	0.008541	-0.00623	0.03634	-0.00682	0.022576	0.038598	0.031139	0.02524		-0.00493	0.023676	0.034751	0.025654	0.040233	0.016617	0.010453	0.018621	0.021299	0.042351	0.032966	0.043044	-0.00989	0.015174	0.025669
4	-0.00989	-0.0156	0.020484	0.023442	-0.01116	0.023552	-0.01695	0.010556	0.02815	0.02098	0.021335	-0.03684	-0.04265	-0.01319	-0.01347	0.008843	0.034087	-0.000693	0.029983	0.036096	0.029406	0.029918	-0.02051	-0.03091	-0.00428	0.002446	0.003506	0.035433	0.000889	0.032556	0.037726	0.030405	0.032339		-0.00481	0.024431	0.034718	0.025737	0.040653	0.015265	0.008221	0.017106	0.020341	0.039827	0.030487	0.041899	-0.02193	0.00824	0.013837
5	-0.01277	-0.01816	0.016856	0.017472	-0.00448	0.024266	-0.01062	0.017899	0.029173	0.021835	0.026855	-0.09633	-0.10156	-0.07436	-0.08568	0.005649	0.004638	-0.00773	0.030835	0.008336	0.001503	0.018172	-0.02824	-0.0438	-0.01648	-0.01474	0.006323	0.016109	0.000384	0.039376	0.018456	0.011234	0.028209		-0.00868	0.021325	0.031044	0.021796	0.036025	0.013484	0.008423	0.014703	0.018584	0.040431	0.031263	0.040596	-0.03481	-0.00679	-0.000997
6	-0.011	-0.01633	0.018965	0.016226	-0.00305	0.019544	-0.00837	0.020833	0.024645	0.017115	0.027768	-0.16918	-0.17367	-0.14508	-0.17059	-0.04304	-0.05815	-0.06398	-0.01516	-0.05327	-0.06022	-0.04252	-0.03036	-0.05471	-0.02316	-0.0308	-0.01152	-0.02261	-0.02491	0.02836	-0.01962	-0.02687	-0.00253		-0.01118	0.015687	0.027903	0.01787	0.027255	0.008629	0.005887	0.009434	0.014082	0.037979	0.028925	0.036109	-0.03239	-0.02689	-0.00282
7	-0.00638	-0.01188	0.024147	0.018139	-0.01352	0.009662	-0.01719	0.011286	0.013647	0.006031	0.018284	-0.25267	-0.2564	-0.21867	-0.25772	-0.14588	-0.12883	-0.1729	-0.12386	-0.12244	-0.1294	-0.14723	-0.03502	-0.07116	-0.03188	-0.05212	-0.05628	-0.06736	-0.07893	-0.01519	-0.06293	-0.07038	-0.05737		-0.00476	0.012518	0.0329	0.022344	0.019376	0.001085	-0.000699	0.000785	0.007107	0.03107	0.022161	0.028331	-0.0084	-0.03344	0.01867
8	-0.000302	-0.00601	0.031094	0.02246	-0.03202	-0.000216	-0.03481	-0.00879	0.002155	-0.00538	0.0018	-0.32203	-0.32491	-0.27487	-0.32817	-0.29066	-0.20584	-0.31544	-0.2807	-0.19777	-0.20471	-0.28191	-0.04748	-0.09683	-0.04639	-0.07602	-0.1289	-0.11543	-0.15596	-0.09479	-0.10913	-0.11678	-0.12979		0.010318	0.019619	0.046747	0.035664	0.020914	-0.00414	-0.00693	-0.00555	0.00299	0.024604	0.015563	0.022428	0.023421	-0.0243	0.05359
9	0.00936	0.003509	0.043012	0.033199	-0.04978	-0.00631	-0.05188	-0.02867	-0.00518	-0.0125	-0.01331	-0.36908	-0.37127	-0.30588	-0.36643	-0.42886	-0.29139	-0.44298	-0.42825	-0.2838	-0.29088	-0.41302	-0.04129	-0.10348	-0.03887	-0.07506	-0.21825	-0.15554	-0.24401	-0.19604	-0.14965	-0.15713	-0.21108		0.028537	0.035829	0.064898	0.05401	0.03345	-0.000389	-0.00547	-0.00244	0.007695	0.025982	0.01674	0.025284	0.051348	-0.01176	0.088088
10	0.025886	0.020022	0.063137	0.053924	-0.06602	-0.0115	-0.0666	-0.04631	-0.01127	-0.01855	-0.02645	-0.36931	-0.37127	-0.28467	-0.33817	-0.50326	-0.3634	-0.50757	-0.50503	-0.35599	-0.36294	-0.49224	-0.01614	-0.08501	-0.01244	-0.05233	-0.3003	-0.17835	-0.31947	-0.29319	-0.17491	-0.1823	-0.27908		0.04794	0.05888	0.085619	0.075308	0.057633	0.009115	0.001066	0.006482	0.016987	0.032724	0.023524	0.034055	0.078442	0.002367	0.119192
11	0.037931	0.032026	0.0775	0.070642	-0.08057	-0.01876	-0.08005	-0.06174	-0.01838	-0.02579	-0.03877	-0.26299	-0.26568	-0.16347	-0.19986	-0.52248	-0.39235	-0.52285	-0.52359	-0.38214	-0.38895	-0.51707	0.001652	-0.06211	0.007804	-0.0272	-0.35607	-0.18677	-0.36786	-0.36128	-0.18527	-0.19258	-0.32114		0.059744	0.076519	0.098502	0.089064	0.080493	0.018704	0.007109	0.015521	0.025841	0.039528	0.030137	0.043211	0.113631	0.02681	0.154032
12	0.050723	0.04471	0.091468	0.08795	-0.08988	-0.02423	-0.08903	-0.07079	-0.02283	-0.03025	-0.04693	-0.08828	-0.09252	0.002862	-0.01367	-0.521	-0.36157	-0.52015	-0.52275	-0.34788	-0.35485	-0.50981	0.016937	-0.0322	0.026644	0.004952	-0.37701	-0.18165	-0.38164	-0.38706	-0.17952	-0.18695	-0.33256		0.069859	0.088603	0.108544	0.101169	0.0979	0.02642	0.013356	0.023564	0.033792	0.046241	0.036871	0.051003	0.158341	0.066479	0.196615
13	0.060558	0.05442	0.100959	0.100706	-0.09077	-0.02325	-0.08952	-0.07089	-0.02119	-0.02862	-0.04688	0.061891	0.056069	0.132056	0.132399	-0.50146	-0.27457	-0.49777	-0.5084	-0.26075	-0.26768	-0.46664	0.037511	0.004761	0.048265	0.039047	-0.35744	-0.15955	-0.35684	-0.36714	-0.15516	-0.16276	-0.30555		0.074903	0.094806	0.112856	0.108293	0.105953	0.032001	0.019694	0.030455	0.040155	0.05278	0.043424	0.057155	0.208709	0.122127	0.244635
14	0.062254	0.055996	0.101019	0.103305	-0.08444	-0.01942	-0.08338	-0.0637	-0.01744	-0.02492	-0.04123	0.161351	0.154404	0.212918	0.224901	-0.44242	-0.16154	-0.43306	-0.45673	-0.1498	-0.15652	-0.37722	0.053479	0.033351	0.062515	0.06284	-0.30152	-0.11941	-0.29703	-0.30877	-0.11287	-0.12049	-0.24415		0.071242	0.092237	0.108843	0.107122	0.10351	0.033095	0.022121	0.032103	0.041493	0.055322	0.046402	0.058548	0.252512	0.184106	0.286159
15	0.056486	0.050192	0.093803	0.098084	-0.07455	-0.0158	-0.07451	-0.05234	-0.01383	-0.02136	-0.03361	0.21612	0.208643	0.255504	0.274315	-0.35485	-0.06182	-0.33971	-0.37108	-0.05237	-0.05904	-0.2732	0.049827	0.03904	0.057646	0.065842	-0.23496	-0.07453	-0.22674	-0.23812	-0.06775	-0.07531	-0.17546		0.061252	0.085003	0.098915	0.098404	0.098337	0.030559	0.020122	0.028849	0.039202	0.053583	0.045392	0.05619	0.275746	0.235214	0.308367
16	0.040851	0.034639	0.076865	0.083183	-0.06509	-0.01256	-0.06606	-0.04141	-0.01048	-0.01796	-0.02669	0.234932	0.22728	0.266499	0.289066	-0.27756	0.002353	-0.25805	-0.28939	0.00932	0.002675	-0.19321	0.02967	0.026047	0.037454	0.051325	-0.17388	-0.03369	-0.16334	-0.17155	-0.02865	-0.03616	-0.1148		0.04526	0.073289	0.082918	0.08233	0.088492	0.025254	0.014885	0.023273	0.034092	0.048782	0.040862	0.051372	0.276693	0.265621	0.30939
17	0.025929	0.019709	0.060276	0.068595	-0.05419	-0.00722	-0.0559	-0.03005	-0.00496	-0.01232	-0.01735	0.225827	0.218073	0.251456	0.275058	-0.21711	0.03815	-0.19543	-0.22274	0.042808	0.036156	-0.13571	0.0054	0.007291	0.014518	0.032679	-0.12839	-0.00504	-0.11574	-0.1202	-0.00284	-0.01027	-0.07012		0.032012	0.063454	0.069623	0.067923	0.080283	0.021005	0.010536	0.020725	0.0299	0.044732	0.036639	0.048011	0.261373	0.275291	0.294567
18	0.013	0.00688	0.04604	0.055399	-0.04075	-0.000331	-0.04371	-0.01687	0.002164	-0.00514	-0.00519	0.201378	0.193668	0.223204	0.247186	-0.16552	0.058987	-0.144	-0.16557	0.061476	0.054586	-0.08994	-0.01665	-0.01126	-0.00561	0.015666	-0.09126	0.016778	-0.07711	-0.07763	0.016025	0.008731	-0.03485		0.020322	0.053245	0.057906	0.055263	0.072739	0.019129	0.00947	0.019955	0.027992	0.04327	0.03565	0.046578	0.237237	0.271472	0.270523
19	0.000834	-0.00513	0.033193	0.042988	-0.02792	0.005891	-0.0319	-0.00324	0.008634	0.001278	0.006014	0.171502	0.163913	0.191213	0.2156	-0.12229	0.071327	-0.10198	-0.11785	0.072168	0.065124	-0.05273	-0.03605	-0.02922	-0.02326	-0.000162	-0.05478	0.036105	-0.04106	-0.0372	0.033754	0.026419	-0.00152		0.008607	0.043524	0.04613	0.044002	0.065304	0.017937	0.00949	0.018373	0.026567	0.043377	0.036263	0.045168	0.20826	0.260489	0.241433
20	-0.00884	-0.01468	0.02326	0.033817	-0.01934	0.009331	-0.02399	0.006477	0.012736	0.005327	0.012959	0.142183	0.134754	0.160135	0.183826	-0.08992	0.075359	-0.07126	-0.08177	0.07502	0.067952	-0.0256	-0.05571	-0.04663	-0.04042	-0.01551	-0.02705	0.046329	-0.0148	-0.00733	0.043478	0.035922	0.023233		-0.000968	0.036511	0.036856	0.035153	0.059329	0.016054	0.008418	0.016201	0.024378	0.042426	0.035407	0.043103	0.177042	0.243598	0.210274
21	-0.01559	-0.02138	0.016591	0.027673	-0.01127	0.013932	-0.01696	0.01494	0.018161	0.01064	0.019687	0.114797	0.107609	0.131674	0.154015	-0.06261	0.077415	-0.04589	-0.0518	0.076754	0.069471	-0.00299	-0.07844	-0.06633	-0.06003	-0.03331	-0.00412	0.054779	0.006341	0.016914	0.051177	0.043669	0.042646		-0.00798	0.03168	0.030038	0.027752	0.055478	0.016756	0.008795	0.017414	0.025175	0.043281	0.036067	0.043684	0.147244	0.22235	0.180265
22	-0.02111	-0.02684	0.011188	0.022638	-0.00658	0.016111	-0.01381	0.019479	0.020445	0.012973	0.023311	0.092694	0.085758	0.109316	0.130318	-0.03941	0.080062	-0.02448	-0.02586	0.079395	0.072116	0.016228	-0.09359	-0.079	-0.07212	-0.0439	0.016148	0.064084	0.024757	0.038507	0.058638	0.05103	0.058688		-0.01357	0.027012	0.024724	0.021602	0.052404	0.017589	0.010806	0.018893	0.02649	0.045556	0.038243	0.044749	0.123127	0.201155	0.155596
23	-0.028	-0.03366	0.004432	0.015597	-0.00555	0.01535	-0.01374	0.020021	0.019222	0.011863	0.023528	0.077098	0.070392	0.093868	0.113657	-0.01835	0.084982	-0.00478	-0.00245	0.084041	0.076885	0.033707	-0.10074	-0.08472	-0.07716	-0.04872	0.034979	0.073208	0.041354	0.057438	0.065551	0.057868	0.073996		-0.01927	0.020547	0.019565	0.016187	0.04748	0.016911	0.01226	0.018383	0.025445	0.046475	0.039723	0.044313	0.104034	0.182872	0.136281
24	-0.03264	-0.03812	0.000116	0.010865	-0.00448	0.016894	-0.01318	0.02051	0.020255	0.012945	0.02423	0.065672	0.059191	0.082609	0.101103	0.001324	0.090627	0.013204	0.01876	0.089339	0.082151	0.049641	-0.1018	-0.08571	-0.07762	-0.04983	0.052801	0.081791	0.057135	0.075493	0.072718	0.065157	0.08867		-0.02175	0.017281	0.016917	0.013447	0.045077	0.016543	0.013225	0.018036	0.024225	0.046718	0.040464	0.044124	0.088051	0.167556	0.120464
25	-0.03678	-0.04217	-0.00367	0.006381	-0.00407	0.019518	-0.01271	0.020425	0.022855	0.015477	0.024961	0.060984	0.054452	0.078249	0.095647	0.018222	0.094488	0.027917	0.036373	0.092792	0.085629	0.062599	-0.10099	-0.08485	-0.07589	-0.04826	0.065851	0.088274	0.068494	0.089315	0.079531	0.071999	0.099885		-0.02346	0.015348	0.014608	0.011132	0.043088	0.015005	0.0131	0.017055	0.021917	0.046565	0.040277	0.043063	0.079492	0.15935	0.111867
26	-0.042	-0.04771	-0.0091	0.000451	-0.00436	0.020495	-0.0127	0.019508	0.023992	0.016584	0.024998	0.055364	0.048743	0.073264	0.08947	0.032346	0.096478	0.04035	0.051031	0.094689	0.087463	0.073526	-0.09201	-0.07538	-0.06491	-0.03756	0.070406	0.089194	0.071925	0.095042	0.082362	0.074612	0.104368		-0.02655	0.012072	0.011474	0.008075	0.039134	0.011971	0.010867	0.013185	0.017328	0.044498	0.038727	0.040485	0.071953	0.150928	0.104327
27	-0.04504	-0.05098	-0.01207	-0.00328	-0.0047	0.019923	-0.01281	0.019308	0.023315	0.015995	0.024751	0.049056	0.042443	0.06734	0.081851	0.043658	0.097246	0.050482	0.06357	0.095535	0.088137	0.08256	-0.08027	-0.06331	-0.05104	-0.02419	0.073668	0.090157	0.074372	0.09934	0.085249	0.077077	0.108083		-0.02954	0.008703	0.008407	0.005517	0.034616	0.008192	0.005878	0.007049	0.011501	0.039703	0.035096	0.036459	0.063521	0.141518	0.096239
28	-0.04403	-0.05001	-0.01063	-0.00173	-0.00132	0.021464	-0.00965	0.022705	0.02421	0.016962	0.027114	0.047135	0.040498	0.065389	0.078079	0.055888	0.101091	0.061554	0.076792	0.099548	0.092069	0.092642	-0.07044	-0.05411	-0.0407	-0.01409	0.081308	0.098411	0.081224	0.10782	0.093957	0.085674	0.115994		-0.03226	0.006954	0.005391	0.002941	0.031755	0.005597	0.002333	0.00353	0.007917	0.035917	0.032281	0.033161	0.059595	0.136666	0.092278
29	-0.04098	-0.04712	-0.00708	0.001768	0.002555	0.024417	-0.00565	0.026745	0.026906	0.019503	0.030297	0.049629	0.042856	0.067923	0.078901	0.062879	0.102282	0.067282	0.084265	0.101014	0.093508	0.097864	-0.05911	-0.04324	-0.02968	-0.00288	0.087162	0.106093	0.086562	0.114365	0.101532	0.093503	0.121429		-0.03382	0.005829	0.003709	0.000974	0.029981	0.004789	0.000242	0.001532	0.007274	0.033523	0.030319	0.031502	0.060008	0.135165	0.09215
30	-0.03613	-0.0422	-0.00181	0.006961	0.004088	0.025304	-0.00336	0.028762	0.027797	0.020432	0.031962	0.05168	0.044841	0.070101	0.079621	0.068036	0.10306	0.071139	0.090359	0.102042	0.094562	0.100956	-0.04118	-0.02583	-0.01147	0.015008	0.088726	0.108492	0.08791	0.1165	0.103878	0.096108	0.122797		-0.03232	0.006271	0.005629	0.001935	0.030412	0.005023	-0.00108	0.000284	0.008393	0.032048	0.02841	0.031007	0.060559	0.133206	0.092278
31	-0.03253	-0.03844	0.002093	0.01077	0.007258	0.02635	0.000324	0.032219	0.029189	0.021776	0.035613	0.049869	0.042975	0.068322	0.076726	0.076278	0.10665	0.07811	0.099517	0.105781	0.09833	0.106673	-0.03244	-0.0181	-0.0024	0.022569	0.090771	0.109486	0.089971	0.119572	0.105261	0.097557	0.125169		-0.03216	0.0051	0.006023	0.002481	0.030259	0.006503	-0.000487	0.000917	0.010883	0.032687	0.028402	0.032056	0.057928	0.12752	0.089769
32	-0.03089	-0.03668	0.003919	0.012432	0.011025	0.02674	0.004031	0.036095	0.030119	0.022711	0.038899	0.047378	0.040428	0.066128	0.073523	0.084993	0.108101	0.085903	0.108744	0.107429	0.099908	0.113191	-0.02098	-0.00775	0.008503	0.031937	0.093844	0.109877	0.092782	0.123569	0.106276	0.098382	0.128139		-0.03261	0.003987	0.005505	0.002202	0.028771	0.007171	-0.000396	0.001772	0.012043	0.032701	0.028276	0.032728	0.055325	0.122153	0.087185
33	-0.02791	-0.03365	0.006839	0.015261	0.014406	0.027675	0.006885	0.039208	0.03095	0.023685	0.041348	0.046994	0.04011	0.066054	0.072565	0.095001	0.108588	0.094569	0.119274	0.108352	0.100852	0.120794	-0.01189	-0.000638	0.016575	0.038454	0.097654	0.110559	0.096409	0.127643	0.107383	0.099109	0.131517		-0.03294	0.002487	0.00526	0.001513	0.026955	0.006947	-0.00103	0.001419	0.011136	0.031695	0.02791	0.032067	0.055001	0.119942	0.086514
34	-0.02281	-0.02877	0.011782	0.019681	0.016207	0.027741	0.008632	0.040806	0.030826	0.023511	0.042461	0.049672	0.042746	0.068679	0.074484	0.102782	0.108904	0.101063	0.12759	0.109321	0.101784	0.126288	-0.00413	0.005259	0.023573	0.044557	0.102127	0.113239	0.101079	0.130967	0.110355	0.101827	0.136099		-0.03265	0.001401	0.005661	0.001694	0.025502	0.005842	-0.00219	-0.000492	0.009334	0.030626	0.026767	0.030171	0.056805	0.120151	0.087967
35	-0.01725	-0.02337	0.01742	0.024841	0.018259	0.028682	0.011041	0.043175	0.03196	0.024387	0.044313	0.053504	0.046472	0.072616	0.077697	0.107239	0.108752	0.10515	0.132601	0.109478	0.101842	0.129152	0.001256	0.010069	0.029463	0.049052	0.10226	0.113804	0.100594	0.129301	0.111204	0.103076	0.136081		-0.0308	0.001421	0.007283	0.003298	0.024361	0.00563	-0.00268	-0.000627	0.009178	0.030263	0.02566	0.029709	0.058828	0.119955	0.089865
36	-0.01163	-0.01763	0.02312	0.030508	0.02004	0.030774	0.013088	0.044961	0.034069	0.026585	0.046287	0.058118	0.051157	0.077586	0.081645	0.109446	0.108561	0.107196	0.13501	0.109342	0.101743	0.130569	0.007247	0.016431	0.037131	0.054847	0.104829	0.118258	0.102143	0.130744	0.115413	0.10771	0.137633		-0.02742	0.002501	0.010432	0.005902	0.024928	0.007566	-0.00282	0.00152	0.01154	0.030221	0.024901	0.031475	0.062598	0.121281	0.093307
37	-0.01174	-0.01759	0.02312	0.030177	0.018403	0.030837	0.011777	0.042979	0.034335	0.027048	0.045232	0.062264	0.055345	0.082054	0.085294	0.111002	0.108837	0.108197	0.136409	0.109489	0.102006	0.131563	0.014963	0.024703	0.046024	0.062397	0.104718	0.119881	0.101442	0.130674	0.117174	0.109413	0.136672		-0.02855	-0.0012	0.008921	0.003868	0.021151	0.008672	-0.00347	0.003285	0.013451	0.030019	0.023956	0.03278	0.066715	0.123013	0.097166
38	-0.01158	-0.01739	0.023117	0.029693	0.013774	0.028745	0.007825	0.038227	0.03261	0.025314	0.041611	0.065286	0.058314	0.085383	0.087935	0.11205	0.108535	0.108778	0.137404	0.109383	0.101947	0.132233	0.020997	0.02967	0.052144	0.06738	0.101815	0.117382	0.097958	0.127231	0.115243	0.107347	0.132755		-0.02989	-0.00429	0.007524	0.002031	0.017302	0.009014	-0.00357	0.003661	0.015059	0.030034	0.023629	0.033425	0.071194	0.124424	0.101875
39	-0.01033	-0.01625	0.024398	0.03018	0.009655	0.02755	0.004281	0.034363	0.031822	0.024161	0.038671	0.071666	0.064573	0.092335	0.094126	0.115567	0.110227	0.111907	0.1409	0.111344	0.104029	0.135483	0.023281	0.031047	0.054873	0.068049	0.104134	0.119113	0.099198	0.12808	0.117066	0.109033	0.133644		-0.03034	-0.00474	0.007587	0.001871	0.015912	0.011077	0.00034	0.00508	0.018224	0.033897	0.027229	0.035933	0.079398	0.129245	0.110618
40	-0.00903	-0.01515	0.026138	0.031585	0.006725	0.028021	0.001086	0.031245	0.032187	0.024297	0.036375	0.082528	0.075291	0.10393	0.104575	0.119661	0.11383	0.116061	0.14496	0.114903	0.107464	0.139669	0.034121	0.040472	0.065026	0.075914	0.103265	0.119296	0.098588	0.127032	0.11643	0.108358	0.132465		-0.03065	-0.00403	0.007519	0.002159	0.015421	0.015017	0.005098	0.008565	0.022705	0.039065	0.031886	0.039918	0.091677	0.13932	0.123242
41	-0.01082	-0.01702	0.024698	0.030558	0.006088	0.030838	0.00027	0.030334	0.034272	0.026569	0.0361	0.092056	0.084729	0.113438	0.113577	0.121391	0.116306	0.117883	0.146414	0.117547	0.109988	0.141541	0.045777	0.050768	0.076293	0.084437	0.099702	0.117892	0.095638	0.124047	0.1146	0.106625	0.129267		-0.03275	-0.00626	0.004667	0.000162	0.012582	0.019456	0.008864	0.012567	0.02697	0.042702	0.035343	0.043448	0.102898	0.148549	0.134496
42	-0.00975	-0.01593	0.02624	0.032147	0.007906	0.034898	0.002339	0.032329	0.037825	0.030371	0.038615	0.099087	0.091657	0.120203	0.120088	0.119394	0.118081	0.115354	0.14449	0.119487	0.111966	0.139865	0.051423	0.055933	0.082729	0.088107	0.100244	0.120096	0.096125	0.124908	0.117475	0.109501	0.130508		-0.03229	-0.00641	0.004519	0.000227	0.01262	0.022902	0.011195	0.015297	0.029922	0.045004	0.037388	0.04583	0.110739	0.154647	0.142846
43	-0.00479	-0.01102	0.03143	0.037032	0.006944	0.035863	0.001494	0.031424	0.038345	0.030964	0.038353	0.105843	0.098334	0.127248	0.126627	0.11585	0.121301	0.111893	0.141096	0.12229	0.114809	0.137559	0.058624	0.062685	0.091044	0.093542	0.09974	0.118251	0.094923	0.124728	0.117145	0.109121	0.12965		-0.02813	-0.00292	0.009008	0.004211	0.015859	0.023488	0.009858	0.014837	0.03069	0.044286	0.036027	0.045642	0.118317	0.159812	0.150587
44	-0.00714	-0.01333	0.028999	0.034466	0.002075	0.032436	-0.00319	0.026911	0.034685	0.027228	0.033604	0.113918	0.106385	0.136084	0.134777	0.11317	0.124381	0.109902	0.138536	0.125066	0.117488	0.136424	0.064057	0.066671	0.096404	0.096893	0.098084	0.115936	0.092933	0.123462	0.115719	0.107655	0.127586		-0.0287	-0.0046	0.009107	0.003896	0.012938	0.023133	0.008623	0.013154	0.031633	0.043616	0.03468	0.044682	0.128239	0.166691	0.160546
45	-0.01012	-0.0163	0.026074	0.031178	-0.00356	0.027738	-0.00838	0.021683	0.030039	0.022534	0.02831	0.121036	0.113456	0.143708	0.141968	0.109791	0.124572	0.106798	0.134952	0.125659	0.117912	0.133889	0.068665	0.069873	0.100327	0.099718	0.094912	0.114857	0.090296	0.120867	0.114726	0.106666	0.125469		-0.02773	-0.0051	0.010279	0.004747	0.011417	0.023487	0.008785	0.012302	0.034352	0.044434	0.034819	0.044582	0.136677	0.17259	0.169313
46	-0.00864	-0.01478	0.02778	0.032784	-0.00492	0.027078	-0.00966	0.021163	0.029858	0.022475	0.027799	0.124142	0.116452	0.147077	0.145312	0.107128	0.125163	0.10393	0.131553	0.126694	0.118874	0.131834	0.070442	0.071878	0.102658	0.101208	0.089497	0.111508	0.085066	0.115493	0.110992	0.102945	0.120699		-0.02337	-0.00322	0.014484	0.008238	0.012842	0.026752	0.012769	0.015042	0.039918	0.049643	0.039027	0.047491	0.14011	0.173647	0.172647
47	-0.00457	-0.01062	0.031507	0.036287	-0.00467	0.02715	-0.00988	0.022434	0.030601	0.023238	0.029007	0.129256	0.121405	0.152535	0.150618	0.103535	0.125152	0.100281	0.127014	0.127267	0.11941	0.128935	0.070727	0.073004	0.103952	0.102091	0.088538	0.112086	0.083389	0.113741	0.110956	0.102631	0.118683		-0.01853	-0.000198	0.019268	0.012425	0.015196	0.029535	0.016386	0.017614	0.040929	0.054904	0.042564	0.050318	0.144346	0.175744	0.176463
48	-0.00628	-0.01234	0.029608	0.033883	-0.00472	0.026026	-0.01042	0.023647	0.030073	0.022631	0.02944	0.134759	0.126776	0.158426	0.156321	0.100152	0.125264	0.097125	0.123	0.128055	0.120155	0.126036	0.074867	0.076987	0.108128	0.106226	0.090192	0.114037	0.084271	0.115098	0.112828	0.104479	0.11906		-0.01853	-0.00172	0.019322	0.012118	0.012975	0.030446	0.016583	0.017548	0.027316	0.055687	0.04258	0.051067	0.147015	0.177237	0.178969
49	-0.01045	-0.01659	0.025949	0.02934	-0.00456	0.02489	-0.01069	0.024639	0.029141	0.021715	0.029466	0.13836	0.130274	0.162006	0.160164	0.097778	0.125599	0.094559	0.120173	0.128496	0.120645	0.1239	0.080589	0.081642	0.113466	0.112127	0.090207	0.114635	0.084398	0.115648	0.113723	0.105583	0.119256		-0.0218	-0.00607	0.016292	0.008764	0.007476	0.029093	0.013973	0.014746	0.028512	0.052636	0.040211	0.049181	0.147477	0.177376	0.179681
50	-0.01268	-0.01878	0.023775	0.026538	-0.00473	0.022758	-0.01167	0.024726	0.026973	0.019499	0.028361	0.143339	0.135142	0.167117	0.165157	0.096961	0.127358	0.093485	0.119133	0.130277	0.122607	0.123104	0.089003	0.08829	0.120852	0.119833	0.091613	0.117916	0.085524	0.117127	0.117515	0.109572	0.121598		-0.02291	-0.00696	0.014992	0.007361	0.004914	0.024641	0.009242	0.009375	0.038369	0.046972	0.035801	0.043897	0.150026	0.179351	0.182267
51	-0.00949	-0.01555	0.026722	0.029571	-0.00518	0.019086	-0.01247	0.024557	0.023602	0.016046	0.027117	0.150556	0.14225	0.174723	0.172622	0.095832	0.128196	0.091764	0.118104	0.131247	0.12369	0.121562	0.090421	0.088081	0.121131	0.119834	0.091316	0.120759	0.084704	0.11659	0.120278	0.112451	0.121446		-0.02053	-0.00467	0.017461	0.009704	0.006308	0.01887	0.003891	0.003058	0.030051	0.041064	0.030586	0.037411	0.154949	0.182792	0.187214
52	-0.00788	-0.01389	0.028371	0.03127	-0.00419	0.016684	-0.01118	0.025983	0.021886	0.014376	0.027965	0.157162	0.148681	0.181486	0.179333	0.095024	0.127976	0.090279	0.117724	0.131192	0.123624	0.120039	0.085252	0.083384	0.116874	0.114864	0.087169	0.119009	0.080602	0.112604	0.118208	0.110175	0.117115		-0.02165	-0.00697	0.016146	0.00853	0.003797	0.015292	0.000479	-0.000953	0.012031	0.037268	0.027085	0.033072	0.158176	0.183774	0.190419
53	-0.00833	-0.01438	0.027957	0.030424	-0.00289	0.015179	-0.00936	0.027789	0.02092	0.013419	0.029242	0.162752	0.154001	0.187028	0.184914	0.093952	0.126522	0.08885	0.116713	0.129816	0.122277	0.118258	0.086563	0.084249	0.11803	0.115167	0.082683	0.116894	0.077013	0.108985	0.11637	0.108065	0.113882		-0.02497	-0.0106	0.012303	0.00494	0.000933	0.012987	-0.00237	-0.00323	0.008894	0.034272	0.024582	0.030491	0.160264	0.183177	0.192577
54	-0.01091	-0.01703	0.025172	0.027772	-0.00114	0.015443	-0.00762	0.029477	0.021094	0.013596	0.03068	0.165213	0.156072	0.189593	0.187566	0.093192	0.125567	0.087873	0.115487	0.128481	0.120896	0.117763	0.090922	0.08742	0.121403	0.117882	0.078082	0.114191	0.073735	0.105973	0.115312	0.107	0.1124		-0.02919	-0.01501	0.007707	0.000382	-0.0025	0.013566	-0.00203	-0.00311	0.008979	0.034527	0.025055	0.030608	0.1604	0.18069	0.1928
55	-0.0126	-0.01878	0.023364	0.026695	-0.00159	0.01389	-0.00834	0.028834	0.018957	0.011516	0.030014	0.169087	0.159795	0.193682	0.191887	0.091856	0.124281	0.086483	0.113758	0.126916	0.119336	0.116911	0.097192	0.093666	0.127793	0.123138	0.074279	0.11199	0.070973	0.104146	0.115377	0.107281	0.112523		-0.03102	-0.01813	0.00551	-0.00178	-0.00491	0.013297	-0.00272	-0.00339	0.008981	0.033895	0.024482	0.030635	0.163321	0.180623	0.195468
56	-0.01585	-0.02207	0.019867	0.023376	-0.00315	0.011351	-0.00979	0.027604	0.015923	0.008623	0.028086	0.172648	0.163441	0.197749	0.195898	0.090303	0.122178	0.084422	0.111765	0.124881	0.117298	0.115158	0.096223	0.092494	0.127187	0.121266	0.071138	0.109537	0.068711	0.102236	0.114855	0.106771	0.111664		-0.03352	-0.02157	0.002916	-0.00414	-0.00821	0.011367	-0.00467	-0.00421	0.011416	0.032238	0.022913	0.029843	0.167135	0.181951	0.19907
57	-0.02142	-0.02766	0.013906	0.017578	-0.00364	0.011222	-0.00992	0.027451	0.016095	0.008796	0.027737	0.173203	0.164031	0.198507	0.196479	0.088052	0.120063	0.081885	0.109512	0.122833	0.115129	0.113075	0.097565	0.092285	0.127812	0.121107	0.067158	0.103628	0.064748	0.098783	0.109946	0.101722	0.107167		-0.0384	-0.02695	-0.00164	-0.00859	-0.01392	0.010582	-0.0049	-0.00404	0.027306	0.032097	0.022586	0.029891	0.168844	0.181115	0.200701
58	-0.02532	-0.03149	0.009518	0.013231	-0.00103	0.014866	-0.00692	0.029921	0.02015	0.012651	0.03083	0.174738	0.165582	0.199846	0.197938	0.084688	0.118637	0.07889	0.106384	0.121621	0.113722	0.110333	0.10182	0.095311	0.131657	0.124328	0.065558	0.099002	0.062441	0.097962	0.106219	0.097727	0.104526		-0.04253	-0.03127	-0.00557	-0.01226	-0.01912	0.011723	-0.00257	-0.00204	0.029289	0.034191	0.02478	0.031269	0.17163	0.180703	0.203323
59	-0.02424	-0.03027	0.010066	0.013452	0.000864	0.017779	-0.00475	0.032284	0.023199	0.015484	0.032875	0.177591	0.16842	0.202775	0.201164	0.080161	0.116523	0.07513	0.102002	0.119331	0.111476	0.106379	0.102069	0.094619	0.131774	0.124056	0.065548	0.097093	0.0618	0.098549	0.105865	0.0972	0.104197		-0.04103	-0.03007	-0.00413	-0.01112	-0.01859	0.011375	-0.00305	-0.00197	0.029131	0.033727	0.024284	0.031109	0.175178	0.181769	0.207173
60	-0.02247	-0.02845	0.011942	0.014728	-0.000643	0.01778	-0.00621	0.031381	0.023171	0.015455	0.031002	0.178312	0.168999	0.203748	0.202114	0.074455	0.112374	0.070305	0.096611	0.114712	0.106959	0.101135	0.103192	0.095143	0.132606	0.124814	0.060909	0.092244	0.056637	0.094445	0.102181	0.093507	0.099975		-0.03727	-0.02734	-0.000536	-0.00857	-0.01622	0.009065	-0.00615	-0.00388	0.024574	0.030384	0.020918	0.02913	0.175659	0.180631	0.207944
61	-0.01952	-0.0255	0.014881	0.017022	-0.00306	0.015742	-0.00841	0.028602	0.021002	0.013505	0.028847	0.179739	0.170223	0.205303	0.203458	0.07349	0.111877	0.069542	0.095491	0.114062	0.106349	0.099898	0.106745	0.09773	0.135642	0.127059	0.055737	0.086901	0.051492	0.088984	0.09783	0.089082	0.095163		-0.03351	-0.02393	0.002843	-0.00593	-0.01302	0.008021	-0.00765	-0.00518	0.010015	0.028584	0.019049	0.027878	0.17661	0.179909	0.20897
62	-0.0173	-0.02316	0.017237	0.019525	-0.00648	0.014097	-0.01145	0.024928	0.019265	0.011873	0.026432	0.180114	0.170508	0.205777	0.20398	0.074501	0.112907	0.070018	0.09606	0.115319	0.107628	0.100575	0.109365	0.099398	0.138558	0.128113	0.054115	0.0853	0.050189	0.086328	0.097269	0.088513	0.094652		-0.03107	-0.02095	0.004792	-0.00386	-0.00999	0.0101	-0.00617	-0.00377	0.012183	0.029794	0.020062	0.029441	0.176291	0.177829	0.20863
63	-0.01517	-0.02106	0.018931	0.021043	-0.0109	0.013572	-0.01561	0.020478	0.018872	0.011392	0.022866	0.1831	0.173514	0.208808	0.207478	0.073002	0.111613	0.068227	0.094336	0.113997	0.106316	0.098958	0.110983	0.101077	0.140849	0.129347	0.050479	0.082927	0.047401	0.082966	0.095527	0.086745	0.091967		-0.02935	-0.01758	0.00657	-0.00209	-0.00628	0.012748	-0.00363	-0.0017	0.014258	0.031624	0.021756	0.031442	0.177339	0.176825	0.209375
64	-0.01298	-0.01891	0.020471	0.022261	-0.01431	0.012744	-0.01886	0.016937	0.017593	0.010151	0.019354	0.189346	0.179648	0.214935	0.214057	0.071843	0.110022	0.066383	0.092899	0.112673	0.105018	0.097629	0.105908	0.096541	0.136186	0.124899	0.051915	0.085859	0.049945	0.08559	0.098306	0.089663	0.093844		-0.02836	-0.01461	0.008216	-0.000582	-0.00289	0.013688	-0.00144	-0.00137	0.015414	0.033334	0.023219	0.032143	0.180092	0.177694	0.212038
65	-0.01254	-0.01851	0.02071	0.022291	-0.01559	0.010264	-0.02031	0.015524	0.014873	0.007399	0.017584	0.19373	0.183908	0.21954	0.218699	0.069984	0.106954	0.064034	0.090931	0.10999	0.102402	0.095928	0.103332	0.094438	0.134014	0.122761	0.051339	0.087272	0.049659	0.08523	0.099047	0.090611	0.093508		-0.02805	-0.01325	0.008736	0.000261	-0.000439	0.012632	-0.00154	-0.0027	0.014949	0.033085	0.023016	0.030918	0.18109	0.176336	0.213488
66	-0.00934	-0.0155	0.023501	0.024869	-0.01341	0.009049	-0.01899	0.017602	0.013574	0.00604	0.018946	0.191775	0.18189	0.218096	0.216873	0.065799	0.102567	0.060418	0.08729	0.105767	0.098261	0.092117	0.103938	0.095643	0.135983	0.123811	0.049308	0.088213	0.047295	0.082892	0.099678	0.091273	0.091412		-0.02424	-0.01057	0.012367	0.004178	0.003312	0.010916	-0.00349	-0.0047	0.013079	0.031209	0.021383	0.029141	0.177574	0.169891	0.210277
67	-0.01053	-0.01668	0.021908	0.023103	-0.01184	0.008588	-0.01781	0.019175	0.012946	0.005451	0.019735	0.187958	0.178113	0.215017	0.213815	0.060539	0.098163	0.055825	0.082613	0.101742	0.094258	0.086733	0.100802	0.093808	0.134507	0.121262	0.048995	0.089118	0.046114	0.082141	0.10049	0.091934	0.090777		-0.02333	-0.01155	0.013007	0.00506	0.002681	0.006555	-0.00821	-0.00879	0.009709	0.026287	0.016662	0.02497	0.173043	0.162275	0.205443
68	-0.01285	-0.01879	0.019115	0.019803	-0.0105	0.011352	-0.01599	0.020537	0.01555	0.008213	0.021243	0.186373	0.176457	0.214101	0.21322	0.058501	0.096331	0.053369	0.080615	0.100401	0.092833	0.08371	0.098629	0.092701	0.133666	0.119443	0.045578	0.086642	0.043015	0.078647	0.098409	0.089883	0.087529		-0.02287	-0.0126	0.013174	0.005507	0.000914	0.00143	-0.0127	-0.01305	0.00951	0.02152	0.012063	0.020341	0.170459	0.15758	0.202554
69	-0.01256	-0.0185	0.018996	0.019543	-0.01078	0.013107	-0.01588	0.020053	0.017397	0.010065	0.0216	0.181086	0.171037	0.20909	0.208512	0.056441	0.093475	0.050653	0.078669	0.098091	0.090519	0.080937	0.097931	0.092387	0.133372	0.119478	0.042051	0.083631	0.040314	0.075459	0.095587	0.087259	0.083987		-0.02069	-0.01002	0.015304	0.007718	0.002318	-0.00386	-0.01735	-0.01741	0.019974	0.017005	0.007919	0.015628	0.165945	0.151545	0.198002
70	-0.01124	-0.01738	0.020054	0.020798	-0.0103	0.013777	-0.0155	0.020541	0.017866	0.010456	0.022004	0.176904	0.166695	0.204821	0.204542	0.055885	0.090695	0.049698	0.078148	0.09521	0.087748	0.079786	0.100333	0.094589	0.135311	0.122075	0.039711	0.081789	0.037813	0.07253	0.093676	0.085436	0.081207		-0.0188	-0.00704	0.017331	0.009354	0.004326	-0.00544	-0.01945	-0.01817	0.018495	0.01512	0.006085	0.014399	0.162098	0.146745	0.194648
71	-0.01419	-0.02035	0.016974	0.017437	-0.00953	0.014368	-0.01461	0.021378	0.018418	0.011029	0.022794	0.17533	0.165075	0.203278	0.203641	0.053172	0.085006	0.046552	0.075235	0.089297	0.081805	0.076311	0.098759	0.092942	0.13391	0.120636	0.03924	0.083014	0.036953	0.070993	0.094002	0.085878	0.079539		-0.02185	-0.01004	0.014357	0.006051	0.001391	-0.00531	-0.01941	-0.01749	0.018559	0.01495	0.006017	0.01485	0.160432	0.143023	0.193231
72	-0.01726	-0.02341	0.013788	0.013719	-0.00902	0.015041	-0.01358	0.021673	0.019588	0.01219	0.023779	0.17433	0.164146	0.202187	0.202696	0.048567	0.080129	0.041737	0.070625	0.084405	0.076764	0.071365	0.090562	0.085202	0.126814	0.113086	0.037246	0.083612	0.035244	0.068274	0.093351	0.085057	0.075966		-0.02598	-0.01475	0.009943	0.001528	-0.00323	-0.00584	-0.0183	-0.01725	0.018127	0.015777	0.006818	0.015271	0.158745	0.13818	0.191432
73	-0.01592	-0.02205	0.01491	0.014897	-0.01009	0.01465	-0.01435	0.020495	0.019353	0.011968	0.023098	0.176062	0.165828	0.203706	0.203994	0.04239	0.077122	0.035758	0.065004	0.081313	0.07361	0.065409	0.080697	0.076533	0.118569	0.104913	0.032397	0.080608	0.030893	0.063766	0.089234	0.080787	0.06978		-0.02548	-0.01393	0.011065	0.002672	-0.00196	-0.00689	-0.01778	-0.01732	0.016577	0.016031	0.007145	0.015983	0.159531	0.137035	0.192633
74	-0.01761	-0.02375	0.013163	0.013196	-0.00981	0.016235	-0.01454	0.020561	0.020707	0.013263	0.023143	0.173821	0.163595	0.201542	0.202085	0.038062	0.075958	0.031745	0.060608	0.07958	0.071887	0.061619	0.077702	0.075303	0.117691	0.10468	0.028233	0.075817	0.026842	0.059571	0.084176	0.075817	0.065771		-0.02764	-0.01596	0.009604	0.001543	-0.00343	-0.00633	-0.01581	-0.01539	0.016459	0.018149	0.009564	0.018372	0.155622	0.132358	0.188745
75	-0.01421	-0.02033	0.016642	0.01631	-0.0091	0.01849	-0.0141	0.020797	0.023188	0.015603	0.023696	0.172633	0.162378	0.200598	0.201396	0.034368	0.073656	0.02848	0.05655	0.077042	0.069406	0.058674	0.077373	0.07666	0.119239	0.106851	0.025208	0.070057	0.023722	0.055459	0.079205	0.070927	0.063892		-0.02598	-0.01472	0.011127	0.003296	-0.00261	-0.00389	-0.01219	-0.01175	0.017899	0.021598	0.013332	0.021669	0.151118	0.128401	0.184138
76	-0.00725	-0.01329	0.02347	0.023108	-0.00996	0.018892	-0.01488	0.018912	0.024168	0.01648	0.022909	0.172417	0.162113	0.200513	0.201695	0.031629	0.071192	0.026326	0.053175	0.074555	0.066977	0.057023	0.076387	0.076971	0.1196	0.107206	0.026181	0.067879	0.024576	0.055623	0.077837	0.069509	0.065107		-0.02142	-0.01073	0.015178	0.007501	0.000743	-0.000545	-0.00929	-0.00849	0.019284	0.024315	0.016442	0.024841	0.148935	0.126232	0.181682
77	-0.00327	-0.00926	0.027297	0.027286	-0.01052	0.018534	-0.0155	0.017459	0.024111	0.01637	0.022125	0.168953	0.158803	0.19717	0.198184	0.029925	0.070254	0.025194	0.050777	0.073146	0.065591	0.056338	0.07586	0.076233	0.119313	0.106733	0.027192	0.067028	0.025941	0.057843	0.078086	0.06979	0.066045		-0.01903	-0.0088	0.01723	0.009394	0.003202	0.001454	-0.00767	-0.00665	0.019222	0.02584	0.018258	0.026388	0.144942	0.121225	0.177333
78	-0.00105	-0.00707	0.02874	0.028601	-0.00945	0.018658	-0.01415	0.01852	0.024475	0.016808	0.022875	0.166942	0.156885	0.195335	0.196012	0.029148	0.069289	0.024949	0.04953	0.071908	0.06435	0.056035	0.071914	0.072206	0.115758	0.103455	0.026858	0.064511	0.025143	0.058352	0.076192	0.067884	0.064806		-0.01692	-0.00759	0.019171	0.011398	0.005262	0.002707	-0.00558	-0.00512	0.01952	0.027263	0.020376	0.027538	0.141754	0.115976	0.174199
79	-0.00132	-0.0073	0.028186	0.027482	-0.00702	0.018734	-0.01155	0.021529	0.024881	0.017249	0.02469	0.166661	0.156707	0.195123	0.196137	0.028592	0.065358	0.024628	0.049539	0.068501	0.061031	0.054954	0.06424	0.064769	0.108575	0.096725	0.026577	0.06287	0.024536	0.058125	0.075226	0.066883	0.064143		-0.01528	-0.00698	0.020094	0.012217	0.006051	0.003437	-0.00329	-0.00385	0.019642	0.028816	0.022489	0.028577	0.139658	0.112085	0.172645
80	-0.00327	-0.00928	0.026499	0.025358	-0.00347	0.020793	-0.00827	0.025128	0.026839	0.019119	0.027411	0.16582	0.155855	0.194481	0.195944	0.030098	0.06246	0.026067	0.051684	0.066421	0.059028	0.055472	0.062719	0.063876	0.108306	0.097458	0.023176	0.059628	0.021118	0.05444	0.07347	0.065111	0.061374		-0.01555	-0.00746	0.019205	0.011302	0.005409	0.005309	-0.00116	-0.00174	0.020421	0.030944	0.024491	0.030409	0.137319	0.107862	0.170861
81	-0.00147	-0.00761	0.02841	0.027566	-0.00246	0.021569	-0.00747	0.025699	0.027325	0.019741	0.028475	0.164277	0.1541	0.192936	0.194556	0.031246	0.059307	0.026724	0.052925	0.063486	0.056045	0.055636	0.056833	0.059106	0.103976	0.094185	0.023155	0.059925	0.021279	0.054232	0.074882	0.066517	0.061531		-0.01456	-0.00587	0.020475	0.012843	0.007845	0.005782	-0.00169	-0.000938	0.020091	0.03097	0.024339	0.030959	0.133961	0.102938	0.167983
82	0.002022	-0.00433	0.030964	0.030425	-0.00341	0.021271	-0.00849	0.02405	0.026935	0.019402	0.027774	0.167537	0.157193	0.195684	0.197847	0.03011	0.054714	0.025145	0.051881	0.059106	0.051604	0.054054	0.0507	0.054387	0.099121	0.089692	0.020451	0.038854	0.019164	0.051632	0.073447	0.065056	0.059058		-0.01275	-0.0035	0.022804	0.015229	0.011976	0.003929	-0.00498	-0.00295	0.017951	0.027883	0.021042	0.028831	0.133448	0.101383	0.167586
83	0.002182	-0.00429	0.030261	0.029803	-0.00577	0.019405	-0.01088	0.02109	0.025006	0.017421	0.025448	0.170268	0.160015	0.198092	0.200572	0.029644	0.051223	0.024624	0.051924	0.055735	0.048196	0.052898	0.049746	0.054594	0.098788	0.089865	0.016873	0.028198	0.015526	0.047689	0.068709	0.060194	0.055079		-0.01324	-0.00249	0.022648	0.014772	0.012583	-0.000912	-0.01021	-0.00846	0.013597	0.022993	0.015656	0.02361	0.13193	0.099168	0.165889
84	-0.00387	-0.01026	0.023794	0.023021	-0.00868	0.017401	-0.01425	0.018033	0.022754	0.01514	0.022631	0.170401	0.160174	0.198116	0.200796	0.029791	0.047822	0.024812	0.052464	0.052126	0.044571	0.052218	0.049609	0.055532	0.099344	0.092189	0.0186	0.048372	0.016881	0.048802	0.067109	0.058417	0.056519		-0.01815	-0.00599	0.01777	0.010039	0.008206	-0.0054	-0.01532	-0.01399	0.009898	0.018665	0.01092	0.018669	0.128637	0.095043	0.162475
85	-0.00945	-0.01578	0.018214	0.017059	-0.0109	0.015713	-0.0176	0.015443	0.021272	0.013716	0.020057	0.16721	0.157155	0.195197	0.198043	0.032258	0.046128	0.026824	0.055054	0.050045	0.042435	0.053705	0.043855	0.050864	0.093952	0.088161	0.012936	0.049923	0.011407	0.043189	0.060903	0.052268	0.051288		-0.02172	-0.00803	0.014243	0.006873	0.005143	-0.00582	-0.01769	-0.01542	0.00981	0.016603	0.008903	0.017535	0.12469	0.090016	0.158701
86	-0.00892	-0.0152	0.018997	0.017367	-0.01294	0.013428	-0.02012	0.013503	0.019855	0.012386	0.017735	0.164235	0.154255	0.192691	0.195721	0.033649	0.04344	0.027777	0.056799	0.047043	0.039322	0.05422	0.041984	0.049451	0.091719	0.086071	0.005805	0.043754	0.004751	0.037311	0.055104	0.04662	0.045187		-0.01966	-0.00575	0.016087	0.009147	0.006829	-0.00422	-0.0189	-0.01438	0.011259	0.015663	0.008079	0.018273	0.122028	0.086868	0.156527
87	-0.0112	-0.01742	0.016448	0.014936	-0.01345	0.012358	-0.02012	0.013398	0.019199	0.011829	0.017719	0.160807	0.150755	0.189638	0.192506	0.034034	0.041658	0.02816	0.057402	0.045234	0.037325	0.054353	0.043932	0.051283	0.093631	0.087791	0.005693	0.045133	0.005344	0.038282	0.056463	0.048106	0.045524		-0.01977	-0.00657	0.015945	0.009102	0.00537	-0.00243	-0.01678	-0.01308	0.012673	0.017693	0.009956	0.019587	0.118694	0.083384	0.153261
88	-0.01436	-0.02048	0.012794	0.011396	-0.01326	0.011705	-0.01944	0.014279	0.018737	0.011291	0.018132	0.157101	0.146856	0.186376	0.188848	0.034163	0.041743	0.028366	0.057597	0.045849	0.03782	0.054585	0.044801	0.051647	0.094279	0.088812	0.006323	0.045249	0.005711	0.039476	0.057191	0.048919	0.04589		-0.02146	-0.00897	0.014335	0.007424	0.003368	-0.00189	-0.01423	-0.01242	0.013644	0.019948	0.011956	0.02051	0.114734	0.078948	0.149218
89	-0.01312	-0.01907	0.014252	0.012492	-0.0112	0.01158	-0.01743	0.016775	0.019075	0.011503	0.02021	0.154825	0.144399	0.184516	0.18681	0.031858	0.040215	0.026033	0.055262	0.044807	0.036766	0.052236	0.037958	0.045026	0.087737	0.08362	0.005153	0.022459	0.003984	0.037894	0.05522	0.046946	0.044499		-0.02117	-0.00824	0.014701	0.007749	0.005344	-0.00231	-0.01301	-0.01251	0.014159	0.02094	0.013062	0.020716	0.110945	0.074753	0.145611
90	-0.01089	-0.01674	0.017266	0.015373	-0.0109	0.010311	-0.01727	0.017381	0.01805	0.010373	0.020671	0.150587	0.140166	0.18044	0.182406	0.02781	0.038391	0.022085	0.051222	0.04314	0.035314	0.048136	0.028704	0.036629	0.079542	0.076735	0.006217	0.015581	0.005003	0.03802	0.056029	0.047848	0.046306		-0.02089	-0.00778	0.014938	0.008133	0.006573	-0.00524	-0.01539	-0.01582	0.012158	0.018303	0.010452	0.017257	0.104007	0.068342	0.138724
91	-0.01461	-0.02047	0.013744	0.011331	-0.01049	0.01006	-0.0172	0.018065	0.017178	0.009629	0.020925	0.145035	0.134746	0.17481	0.177291	0.021293	0.036378	0.0157	0.044807	0.040909	0.033278	0.041982	0.024285	0.033203	0.076028	0.073983	0.005156	0.03578	0.004264	0.036657	0.055529	0.047463	0.04663		-0.02538	-0.01181	0.010655	0.003659	0.003159	-0.00661	-0.01773	-0.01761	0.011655	0.016208	0.007525	0.014498	0.096627	0.061657	0.131472
92	-0.0193	-0.02529	0.008323	0.005636	-0.01088	0.006974	-0.01778	0.018409	0.013953	0.006503	0.019991	0.14055	0.130441	0.170075	0.173328	0.016561	0.037456	0.011218	0.039839	0.041593	0.034098	0.038063	0.027673	0.037028	0.079706	0.078225	0.000311	0.040564	-0.000119	0.032466	0.051399	0.043302	0.042338		-0.03138	-0.01634	0.005208	-0.00289	-0.00096	-0.00885	-0.02128	-0.02006	0.010474	0.01311	0.00361	0.01157	0.090859	0.056101	0.125777
93	-0.01937	-0.02542	0.00778	0.005512	-0.01155	0.002021	-0.01899	0.018344	0.009314	0.001625	0.018219	0.135784	0.125785	0.164952	0.168365	0.014311	0.038647	0.009458	0.037363	0.042548	0.035094	0.036583	0.029918	0.039232	0.081524	0.080358	-0.00406	0.03674	-0.00346	0.029389	0.046243	0.037836	0.03851		-0.03274	-0.01694	0.004405	-0.00448	-0.00117	-0.01124	-0.02561	-0.02259	0.008417	0.009142	-0.000166	0.00944	0.083697	0.049135	0.118642
94	-0.02076	-0.02664	0.006537	0.004468	-0.00975	-0.000285	-0.01764	0.020242	0.00758	-0.000311	0.019042	0.130671	0.120645	0.159797	0.163616	0.010997	0.037549	0.006996	0.03428	0.041548	0.034107	0.034353	0.024396	0.033836	0.076764	0.075622	-0.0054	0.033041	-0.00362	0.029315	0.041966	0.033498	0.037879		-0.03372	-0.01854	0.003611	-0.00496	-0.00174	-0.01025	-0.02589	-0.02146	0.009281	0.008998	-0.000237	0.01045	0.076943	0.042408	0.111723
95	-0.02602	-0.03173	0.001404	-0.000718	-0.00719	-0.000106	-0.0149	0.0228	0.008183	0.000451	0.021619	0.125167	0.115221	0.154783	0.158775	0.007954	0.036132	0.004511	0.031462	0.039893	0.032621	0.032194	0.017003	0.026878	0.070147	0.068674	-0.00494	0.030365	-0.0021	0.031019	0.038635	0.030393	0.03875		-0.03717	-0.02317	7.13e-05	-0.00785	-0.0052	-0.00948	-0.02503	-0.02098	0.010588	0.010157	0.000551	0.010885	0.070343	0.035471	0.104804
96	-0.03087	-0.03651	-0.00362	-0.00632	-0.00299	0.003921	-0.01051	0.027246	0.011687	0.004263	0.026414	0.120997	0.111141	0.150728	0.154607	0.006355	0.032974	0.002533	0.029705	0.036398	0.029242	0.030325	0.012368	0.02192	0.064652	0.063473	-0.00476	0.028906	-0.00208	0.031858	0.03566	0.027487	0.03817		-0.04118	-0.02683	-0.0039	-0.01139	-0.00914	-0.00824	-0.02246	-0.0203	0.013082	0.012864	0.003275	0.01215	0.063877	0.029403	0.098523
97	-0.03409	-0.03964	-0.00717	-0.0098	0.002266	0.010448	-0.00518	0.032868	0.017651	0.010322	0.032395	0.120715	0.110733	0.149952	0.154028	0.006901	0.030186	0.002215	0.029749	0.033378	0.026203	0.029841	0.009844	0.018966	0.061089	0.059865	-0.00598	0.026519	-0.00418	0.031044	0.032853	0.024752	0.035667		-0.04459	-0.0282	-0.00749	-0.01494	-0.01179	-0.00448	-0.01792	-0.01622	0.018778	0.017684	0.007767	0.015985	0.060756	0.026468	0.095474
98	-0.03116	-0.03673	-0.00458	-0.00641	0.002782	0.014852	-0.00412	0.034069	0.021865	0.014451	0.033666	0.117834	0.107846	0.146811	0.151069	0.006032	0.02754	0.00133	0.02884	0.030691	0.023344	0.028465	0.006562	0.015568	0.057575	0.055778	-0.00953	0.022014	-0.00865	0.028426	0.029557	0.021506	0.031165		-0.04095	-0.02214	-0.00397	-0.01128	-0.00654	-0.00187	-0.01592	-0.01289	0.02358	0.020382	0.009836	0.018697	0.05694	0.023336	0.092188
99	-0.02811	-0.03365	-0.00123	-0.00297	-0.00154	0.016021	-0.00771	0.030314	0.022726	0.015264	0.030093	0.11331	0.103347	0.142287	0.146504	0.003118	0.024063	-0.000728	0.025939	0.02708	0.019688	0.025921	-0.00311	0.005524	0.047665	0.045397	-0.00996	0.018021	-0.01015	0.028161	0.026323	0.018326	0.02947		-0.03611	-0.01552	0.000797	-0.00614	0.000221	-0.00146	-0.01712	-0.01197	0.026002	0.020566	0.008831	0.019587	0.051468	0.018413	0.087213
100	-0.02612	-0.03174	0.00108	-0.000725	-0.00317	0.019708	-0.0088	0.028772	0.025858	0.018438	0.029508	0.108852	0.098874	0.137726	0.141834	0.000895	0.022654	-0.00264	0.023454	0.025337	0.017998	0.024316	-0.01073	-0.00326	0.039018	0.036388	-0.00645	0.016376	-0.00772	0.030656	0.024427	0.016402	0.031716		-0.03335	-0.01212	0.003595	-0.0034	0.003381	0.003199	-0.01347	-0.00701	0.031615	0.025267	0.012346	0.02469	0.045991	0.013676	0.081717
101	-0.02495	-0.0306	0.002635	0.001369	-0.00197	0.025303	-0.00766	0.029887	0.030946	0.02375	0.031382	0.105619	0.095591	0.134573	0.138684	-0.00337	0.021903	-0.00677	0.019264	0.024325	0.017051	0.020863	-0.01611	-0.00987	0.032155	0.030258	-0.00397	0.014576	-0.00539	0.032435	0.02145	0.013418	0.033326		-0.03213	-0.01138	0.004766	-0.00253	0.003931	0.011898	-0.00477	0.001275	0.036767	0.034544	0.020533	0.033381	0.040388	0.009604	0.076248
102	-0.0186	-0.02435	0.009159	0.008411	-0.00243	0.028705	-0.00871	0.029984	0.03428	0.027194	0.031064	0.103409	0.093423	0.132311	0.136708	-0.00641	0.021062	-0.00952	0.016131	0.023092	0.015714	0.018613	-0.01999	-0.01402	0.028286	0.026796	-0.00499	0.01149	-0.00582	0.031712	0.016175	0.008061	0.031186		-0.02483	-0.00422	0.011903	0.004842	0.011161	0.019621	0.002519	0.008227	0.028313	0.041935	0.027291	0.040414	0.034923	0.004714	0.071007
103	-0.0163	-0.02204	0.011397	0.010701	-0.00298	0.03182	-0.00932	0.029497	0.037588	0.030436	0.031394	0.101648	0.091757	0.130301	0.134968	-0.00687	0.018545	-0.00977	0.015849	0.020172	0.01274	0.018468	-0.02488	-0.01905	0.023043	0.021616	-0.00536	0.010277	-0.00633	0.031855	0.013363	0.005044	0.02935		-0.01986	0.000783	0.01671	0.009828	0.015451	0.02591	0.008887	0.013973	0.035761	0.047228	0.033825	0.046004	0.029796	-0.000572	0.06597
104	-0.02083	-0.02639	0.006459	0.005596	-0.00349	0.035283	-0.00959	0.0277	0.040293	0.033016	0.032103	0.096431	0.086636	0.125146	0.130107	-0.00347	0.016442	-0.00646	0.020044	0.017788	0.010348	0.021051	-0.02871	-0.02335	0.018476	0.016595	-0.00431	0.011469	-0.00702	0.032636	0.014455	0.006088	0.029142		-0.02212	-0.00146	0.014815	0.008312	0.012743	0.03078	0.014768	0.018966	0.051023	0.051745	0.040198	0.050805	0.021941	-0.00685	0.057891
105	-0.02122	-0.02675	0.006327	0.005601	-0.00631	0.036317	-0.01216	0.023449	0.040824	0.033383	0.02971	0.0894	0.079648	0.118512	0.123751	-0.000416	0.012919	-0.00342	0.023742	0.014051	0.006593	0.022678	-0.03284	-0.02848	0.014046	0.011659	-0.00652	0.009769	-0.0103	0.029833	0.012365	0.004014	0.026575		-0.01972	0.000962	0.017658	0.010987	0.015651	0.032996	0.017852	0.021484	0.039132	0.054092	0.043527	0.05302	0.013798	-0.01321	0.049548
106	-0.02077	-0.02641	0.007116	0.006246	-0.00943	0.035005	-0.01512	0.020284	0.040041	0.032579	0.026507	0.0832	0.073378	0.112417	0.117913	0.000939	0.008201	-0.00186	0.025568	0.009097	0.001663	0.023059	-0.04058	-0.03653	0.006859	0.004925	-0.01118	0.003832	-0.01386	0.024728	0.005364	-0.00301	0.022579		-0.01653	0.00437	0.020994	0.014168	0.019895	0.033752	0.019341	0.02288	0.041186	0.055763	0.044874	0.05382	0.006832	-0.01916	0.042905
107	-0.0232	-0.02894	0.005038	0.004129	-0.01087	0.034028	-0.01674	0.019745	0.03963	0.032167	0.024676	0.078906	0.069082	0.108227	0.114268	0.000275	0.004059	-0.00275	0.025072	0.004946	-0.00232	0.021981	-0.04478	-0.04105	0.003069	-0.0001	-0.01428	-0.00142	-0.01575	0.021702	-0.00102	-0.00946	0.02007		-0.01924	0.002793	0.018183	0.011725	0.018553	0.035965	0.02159	0.025525	0.045141	0.058894	0.046832	0.055851	0.00191	-0.02306	0.038759
108	-0.02742	-0.03313	0.001145	0.000103	-0.01548	0.030398	-0.02113	0.015834	0.036443	0.028942	0.019736	0.075103	0.065288	0.104549	0.111128	-0.00229	3.44e-05	-0.00585	0.022275	0.000674	-0.00649	0.019418	-0.04732	-0.04348	0.001083	-0.00348	-0.0129	-0.00113	-0.01396	0.023144	-0.0005	-0.00902	0.021287		-0.02629	-0.00284	0.011516	0.004684	0.012546	0.034887	0.019455	0.024427	0.045717	0.05706	0.044657	0.054574	-0.00364	-0.02636	0.033977
109	-0.03097	-0.03666	-0.00253	-0.00376	-0.01988	0.026151	-0.02496	0.010929	0.032167	0.024629	0.014975	0.068165	0.058469	0.09731	0.103841	-0.00672	-0.00414	-0.01003	0.017355	-0.00383	-0.01114	0.015953	-0.04773	-0.04368	0.00067	-0.00492	-0.0146	-0.00113	-0.01599	0.021728	-0.000759	-0.00921	0.019272		-0.03133	-0.007	0.006661	-0.00048	0.00746	0.030954	0.015802	0.020771	0.042773	0.05216	0.041309	0.051011	-0.01406	-0.03553	0.023743
110	-0.03177	-0.03757	-0.0037	-0.00497	-0.01837	0.024723	-0.0238	0.011364	0.030437	0.022858	0.015641	0.060099	0.050526	0.088698	0.095014	-0.0122	-0.00728	-0.01482	0.011893	-0.00718	-0.01458	0.01124	-0.0479	-0.04439	-0.000268	-0.00711	-0.02342	-0.00664	-0.02432	0.013965	-0.00651	-0.01483	0.01116		-0.03312	-0.00851	0.004762	-0.00215	0.005203	0.027554	0.014205	0.018063	0.039984	0.049864	0.040475	0.048584	-0.02402	-0.0456	0.013771
111	-0.03202	-0.03795	-0.0036	-0.00449	-0.01355	0.024706	-0.01955	0.016104	0.029951	0.022511	0.019729	0.053217	0.043753	0.082015	0.088183	-0.01322	-0.00821	-0.01559	0.011273	-0.00851	-0.01563	0.010177	-0.05122	-0.04851	-0.00408	-0.01277	-0.02694	-0.0068	-0.02726	0.009932	-0.00635	-0.0146	0.009379		-0.03353	-0.0088	0.004469	-0.00224	0.005125	0.023258	0.011849	0.014426	0.03623	0.047335	0.038399	0.044909	-0.03269	-0.05429	0.004985
112	-0.03088	-0.03677	-0.00219	-0.00272	-0.00994	0.023429	-0.01601	0.020154	0.028466	0.021196	0.022964	0.047063	0.037666	0.075999	0.0826	-0.01037	-0.01017	-0.01287	0.014707	-0.0109	-0.01793	0.011939	-0.05626	-0.05427	-0.00871	-0.01939	-0.03023	-0.00499	-0.02951	0.005139	-0.00574	-0.01407	0.007618		-0.03166	-0.00669	0.005958	-0.000931	0.007078	0.017419	0.006945	0.009131	0.033692	0.042309	0.033595	0.03944	-0.04089	-0.06046	-0.00294
113	-0.02871	-0.03443	-0.000349	-0.000557	-0.00646	0.021989	-0.01241	0.023787	0.027176	0.01981	0.02605	0.044355	0.035027	0.073073	0.080394	-0.00933	-0.0144	-0.01196	0.016342	-0.01518	-0.02243	0.011605	-0.05355	-0.05266	-0.00642	-0.0185	-0.03022	-0.000755	-0.02868	0.003199	-0.00353	-0.01175	0.008385		-0.02965	-0.00362	0.007981	0.000932	0.009883	0.01265	0.002492	0.005015	0.043407	0.03786	0.029563	0.035394	-0.04482	-0.06236	-0.00674
114	-0.02889	-0.03449	-0.00105	-0.00146	-0.0026	0.022712	-0.00848	0.027905	0.02805	0.020408	0.029452	0.040044	0.0309	0.068767	0.07675	-0.0122	-0.01934	-0.01455	0.013884	-0.0201	-0.0277	0.008516	-0.05561	-0.05491	-0.00863	-0.02053	-0.02726	0.002846	-0.02562	0.004089	-0.000643	-0.00875	0.01188		-0.03081	-0.00374	0.007484	0.000421	0.01031	0.01075	0.000832	0.003469	0.041157	0.036152	0.028425	0.034017	-0.0507	-0.06587	-0.01201
115	-0.03092	-0.0366	-0.00309	-0.00372	-2.78e-05	0.022578	-0.00616	0.030783	0.028109	0.020403	0.031452	0.032201	0.023275	0.060473	0.068629	-0.0167	-0.02207	-0.0187	0.009566	-0.02348	-0.03111	0.004687	-0.06178	-0.06041	-0.01422	-0.02707	-0.0269	0.001468	-0.02581	0.002353	-0.00192	-0.01018	0.012675		-0.03339	-0.00616	0.005226	-0.00202	0.008286	0.008749	-0.00142	0.001827	0.038612	0.034058	0.026396	0.032117	-0.06066	-0.07357	-0.02102
116	-0.02883	-0.03477	-0.000645	-0.00128	4.23e-05	0.019556	-0.00623	0.030793	0.025476	0.018011	0.031117	0.024632	0.015747	0.052177	0.060505	-0.02288	-0.02587	-0.02515	0.003156	-0.02793	-0.03533	-0.00122	-0.06456	-0.06235	-0.01587	-0.031	-0.0307	-0.00404	-0.03011	-0.00238	-0.00774	-0.01608	0.008398		-0.03321	-0.00635	0.005417	-0.00181	0.008356	0.006203	-0.00518	-8.6e-05	0.035368	0.030573	0.022651	0.029709	-0.07092	-0.08282	-0.03081
117	-0.02594	-0.03213	0.002496	0.002193	-0.00112	0.016957	-0.0072	0.029386	0.023097	0.015774	0.029628	0.019625	0.010835	0.046968	0.055319	-0.02771	-0.02877	-0.02969	-0.00166	-0.03128	-0.03845	-0.006	-0.06778	-0.06468	-0.01748	-0.03346	-0.03393	-0.0086	-0.0342	-0.00519	-0.01264	-0.02098	0.003753		-0.03264	-0.00632	0.005841	-0.00117	0.008498	0.00528	-0.0073	0.000313	0.033746	0.028464	0.019911	0.029519	-0.07963	-0.09086	-0.03995
118	-0.02442	-0.03066	0.003963	0.003887	-0.0023	0.016055	-0.00815	0.028353	0.021796	0.014466	0.027777	0.017079	0.008396	0.044327	0.052662	-0.03096	-0.03047	-0.03221	-0.00453	-0.03304	-0.04025	-0.00875	-0.06574	-0.06225	-0.01416	-0.03075	-0.03447	-0.0105	-0.03506	-0.00439	-0.01474	-0.02305	0.002528		-0.03125	-0.00512	0.00719	0.000711	0.009592	0.004594	-0.00826	0.000679	0.031784	0.027139	0.018251	0.02938	-0.08519	-0.09545	-0.04592
119	-0.0226	-0.02873	0.006081	0.005991	-0.00119	0.017712	-0.00671	0.029623	0.022987	0.015494	0.028159	0.013371	0.004682	0.04057	0.049059	-0.03043	-0.02891	-0.03145	-0.00396	-0.03117	-0.03856	-0.00749	-0.06292	-0.0597	-0.01158	-0.02836	-0.0344	-0.01207	-0.0344	-0.00306	-0.01618	-0.02461	0.002735		-0.02778	-0.000624	0.010611	0.004476	0.013991	0.005017	-0.00813	0.001221	0.030943	0.026823	0.018362	0.029768	-0.0907	-0.09933	-0.05142
120	-0.02348	-0.02943	0.005573	0.005492	0.001118	0.018768	-0.00457	0.031698	0.023857	0.016214	0.030136	0.009525	0.000807	0.036522	0.045187	-0.02962	-0.0273	-0.03056	-0.00311	-0.02894	-0.03637	-0.00609	-0.06914	-0.06619	-0.01861	-0.03552	-0.03218	-0.00959	-0.03135	0.000956	-0.01252	-0.02119	0.005317		-0.02747	0.000458	0.01098	0.004732	0.015088	0.005396	-0.00738	0.001579	0.030547	0.027436	0.01954	0.030416	-0.09572	-0.1019	-0.05573
121	-0.028	-0.03369	0.00101	0.001389	0.004604	0.019196	-0.00206	0.034716	0.024523	0.016891	0.033431	0.005	-0.00356	0.031861	0.040268	-0.02864	-0.02673	-0.02986	-0.00225	-0.02732	-0.03478	-0.00506	-0.07928	-0.0767	-0.02886	-0.04659	-0.02959	-0.00517	-0.02823	0.004193	-0.00722	-0.01585	0.008448		-0.03043	-0.00282	0.008205	0.001558	0.011439	0.005214	-0.00697	0.001526	0.0299	0.028264	0.019766	0.03076	-0.10099	-0.10564	-0.06068
122	-0.02953	-0.03509	-0.000393	0.00042	0.008274	0.0188	0.001184	0.038288	0.024575	0.016886	0.036724	0.001219	-0.00721	0.028153	0.036505	-0.02763	-0.02757	-0.02998	-0.00185	-0.02754	-0.03505	-0.00503	-0.08105	-0.07833	-0.03005	-0.04812	-0.02509	0.000471	-0.02438	0.007495	-0.00183	-0.01031	0.012791		-0.02985	-0.00224	0.009203	0.00193	0.01083	0.00631	-0.00562	0.002538	0.030182	0.029436	0.020755	0.032136	-0.10529	-0.11003	-0.06508
123	-0.02624	-0.03179	0.003134	0.004437	0.010162	0.019889	0.003669	0.04086	0.025986	0.018199	0.038207	-0.00245	-0.01081	0.024361	0.032856	-0.02811	-0.027	-0.03147	-0.00214	-0.02739	-0.03482	-0.0058	-0.07899	-0.07611	-0.02776	-0.04657	-0.02146	0.004015	-0.02229	0.009915	0.001289	-0.00699	0.01525		-0.0263	0.001925	0.013248	0.005782	0.013441	0.009196	-0.00288	0.00536	0.032395	0.03176	0.023202	0.035473	-0.10808	-0.11254	-0.06802
124	-0.02053	-0.02612	0.008641	0.009829	0.00816	0.021295	0.002223	0.039378	0.027814	0.020068	0.036682	-0.00946	-0.01772	0.016892	0.025461	-0.02909	-0.02728	-0.03282	-0.00257	-0.028	-0.03546	-0.00673	-0.08176	-0.07856	-0.03009	-0.04912	-0.02127	0.002573	-0.02369	0.010145	-0.000343	-0.00862	0.014289		-0.02099	0.008181	0.018831	0.011479	0.019379	0.011345	-0.0009	0.007092	0.033609	0.033875	0.025049	0.037651	-0.11351	-0.11683	-0.07357
125	-0.02186	-0.02746	0.006852	0.007961	0.003649	0.020646	-0.00228	0.034247	0.027716	0.020116	0.033125	-0.01644	-0.02455	0.009719	0.01877	-0.02846	-0.02803	-0.03257	-0.00213	-0.02893	-0.03636	-0.00721	-0.08413	-0.08079	-0.03237	-0.05094	-0.01702	0.004242	-0.02067	0.014655	0.001546	-0.00699	0.018051		-0.02267	0.007992	0.016785	0.009612	0.018956	0.010833	-0.000948	0.007027	0.032882	0.034039	0.025221	0.037474	-0.11735	-0.12064	-0.07757
126	-0.02386	-0.0297	0.004952	0.006512	-5.31e-05	0.020748	-0.00609	0.02936	0.028025	0.020552	0.030864	-0.02148	-0.02947	0.0049	0.014647	-0.0267	-0.0293	-0.03143	-0.000619	-0.03039	-0.03769	-0.00675	-0.08648	-0.08333	-0.0348	-0.05315	-0.01357	0.006351	-0.01643	0.01896	0.003942	-0.00463	0.022782		-0.02332	0.00891	0.016294	0.009404	0.019523	0.009747	-0.000913	0.007181	0.032151	0.034223	0.025579	0.037512	-0.11887	-0.12169	-0.07878
127	-0.02451	-0.0305	0.004916	0.007116	-0.00119	0.022384	-0.00706	0.02691	0.029762	0.022243	0.030977	-0.02714	-0.03509	-0.000354	0.009421	-0.02039	-0.02758	-0.02555	0.00585	-0.02876	-0.03613	-0.00117	-0.08747	-0.08411	-0.03572	-0.05382	-0.01562	0.004135	-0.01712	0.017831	0.001745	-0.00654	0.021808		-0.02202	0.010832	0.018203	0.011627	0.021078	0.00839	-0.00126	0.00704	0.030623	0.033915	0.024839	0.037416	-0.1226	-0.12398	-0.08227
128	-0.02526	-0.0312	0.003908	0.005952	-0.00144	0.023244	-0.00734	0.02593	0.030462	0.022766	0.030931	-0.03169	-0.03959	-0.00509	0.004492	-0.01341	-0.02508	-0.01866	0.012978	-0.02619	-0.03366	0.005254	-0.09155	-0.0869	-0.03924	-0.05712	-0.01805	0.002514	-0.01885	0.016638	0.000256	-0.00794	0.019383		-0.02248	0.009914	0.01771	0.010974	0.020228	0.006134	-0.00327	0.005789	0.028164	0.03186	0.022593	0.035926	-0.12519	-0.12497	-0.08482
129	-0.02661	-0.03258	0.001888	0.003379	-0.00543	0.01941	-0.01086	0.022381	0.026192	0.018478	0.026679	-0.03378	-0.04164	-0.00762	0.002098	-0.0089	-0.02371	-0.01459	0.017384	-0.02465	-0.03217	0.009018	-0.0901	-0.08467	-0.0374	-0.05537	-0.01955	0.002748	-0.02062	0.015315	0.000352	-0.00787	0.017949		-0.02456	0.006229	0.015148	0.008072	0.016467	0.001372	-0.00641	0.001749	0.023205	0.028602	0.019682	0.031831	-0.12616	-0.1249	-0.08593
130	-0.02964	-0.03558	-0.00116	8.15e-05	-0.01034	0.014737	-0.01521	0.017506	0.02144	0.013668	0.021753	-0.0368	-0.04462	-0.01064	-0.000984	-0.0047	-0.02176	-0.01067	0.021619	-0.02274	-0.03021	0.012689	-0.08621	-0.08039	-0.03322	-0.05033	-0.01905	0.002266	-0.02053	0.016216	4.75e-05	-0.00799	0.018524		-0.02844	0.001224	0.0112	0.003738	0.010885	-0.00427	-0.00962	-0.00309	0.017887	0.025251	0.016535	0.027129	-0.12767	-0.12515	-0.08761
131	-0.0281	-0.03412	0.000974	0.001712	-0.0095	0.015838	-0.01411	0.017962	0.022588	0.01488	0.022947	-0.04127	-0.04902	-0.01456	-0.0049	-0.00457	-0.02266	-0.01063	0.02215	-0.02358	-0.03094	0.013003	-0.08125	-0.0756	-0.02914	-0.04576	-0.02173	-0.00129	-0.02188	0.015245	-0.00231	-0.0103	0.016329		-0.02816	0.00166	0.011104	0.003702	0.010817	-0.00546	-0.00993	-0.00342	0.016789	0.024639	0.016374	0.026375	-0.12908	-0.12462	-0.08933
132	-0.02628	-0.03228	0.003359	0.004301	-0.00496	0.021304	-0.00991	0.02256	0.027732	0.020226	0.027465	-0.0467	-0.05427	-0.01969	-0.00996	-0.00795	-0.02393	-0.01408	0.01896	-0.02471	-0.03199	0.010354	-0.08024	-0.07505	-0.02863	-0.04469	-0.02353	-0.00298	-0.02266	0.014155	-0.00238	-0.0105	0.015479		-0.02645	0.003275	0.012459	0.00526	0.012788	-0.00252	-0.00804	-0.000282	0.019619	0.026349	0.018446	0.028768	-0.1331	-0.1261	-0.09341
133	-0.02203	-0.02793	0.00778	0.009232	-0.00359	0.024027	-0.00866	0.024258	0.03053	0.023076	0.029161	-0.04837	-0.05585	-0.02212	-0.01234	-0.01127	-0.02314	-0.01741	0.015734	-0.02363	-0.03092	0.007853	-0.08462	-0.08059	-0.03342	-0.04785	-0.02466	-0.00453	-0.0243	0.011879	-0.00268	-0.0108	0.014484		-0.02069	0.008296	0.017718	0.010624	0.018567	0.000395	-0.00787	0.002224	0.022298	0.026794	0.018868	0.031299	-0.13455	-0.12521	-0.09463
134	-0.02181	-0.02762	0.007743	0.009168	-0.00448	0.023406	-0.00921	0.023448	0.029997	0.022409	0.028737	-0.04934	-0.05691	-0.02353	-0.01345	-0.01404	-0.02117	-0.02012	0.012317	-0.02147	-0.02883	0.006164	-0.08415	-0.08121	-0.03394	-0.04589	-0.02535	-0.00513	-0.02567	0.009635	-0.00255	-0.01055	0.013001		-0.01993	0.009766	0.018362	0.011357	0.020823	0.002776	-0.00894	0.00447	0.024798	0.026241	0.017968	0.033601	-0.13405	-0.12263	-0.09347
135	-0.02359	-0.02927	0.006026	0.007602	-0.00627	0.021509	-0.01069	0.021676	0.027769	0.02008	0.026702	-0.05424	-0.06163	-0.02825	-0.01832	-0.01714	-0.01881	-0.02286	0.00907	-0.01925	-0.02677	0.004003	-0.08633	-0.08377	-0.0377	-0.04893	-0.02853	-0.00883	-0.02904	0.006132	-0.00579	-0.01371	0.00937		-0.02202	0.008987	0.016909	0.009772	0.020716	0.004739	-0.0094	0.005856	0.026498	0.026619	0.017694	0.035202	-0.13583	-0.12158	-0.09491
136	-0.02677	-0.0322	0.00309	0.005201	-0.00926	0.020092	-0.01378	0.01886	0.026433	0.018774	0.023064	-0.05986	-0.06705	-0.03364	-0.02383	-0.01969	-0.01721	-0.02561	0.006741	-0.0178	-0.0254	0.00145	-0.08814	-0.08557	-0.04016	-0.05077	-0.03099	-0.01297	-0.03272	0.002946	-0.00992	-0.01789	0.006501		-0.02308	0.008267	0.016512	0.009099	0.020337	0.006162	-0.00694	0.00669	0.027309	0.029273	0.019818	0.036268	-0.13804	-0.12239	-0.09752
137	-0.02818	-0.03357	0.001686	0.004364	-0.01144	0.0203	-0.01623	0.016816	0.026766	0.019358	0.020904	-0.06316	-0.07026	-0.03708	-0.02717	-0.02076	-0.01772	-0.02657	0.00597	-0.01821	-0.02587	0.000173	-0.0848	-0.08223	-0.037	-0.04576	-0.03022	-0.01254	-0.03371	0.002417	-0.00999	-0.01818	0.005693		-0.02076	0.009956	0.019011	0.01158	0.022339	0.007682	-0.00245	0.007992	0.028515	0.033287	0.024345	0.037977	-0.13823	-0.12228	-0.09804
138	-0.03056	-0.03606	-0.00106	0.001785	-0.01353	0.020473	-0.01848	0.01469	0.026654	0.019429	0.019136	-0.06663	-0.0736	-0.04089	-0.03094	-0.01898	-0.01772	-0.02395	0.008291	-0.01798	-0.02557	0.001826	-0.08789	-0.08606	-0.04054	-0.04871	-0.02712	-0.00945	-0.03116	0.00422	-0.00719	-0.01566	0.008286		-0.02164	0.0087	0.017713	0.010407	0.021378	0.010447	0.002457	0.010072	0.030478	0.037831	0.0298	0.040933	-0.13882	-0.12184	-0.09861
139	-0.03095	-0.03657	-0.00255	0.000748	-0.01686	0.019358	-0.02171	0.01171	0.024981	0.017613	0.015772	-0.06958	-0.0765	-0.04407	-0.03392	-0.01691	-0.01658	-0.02116	0.010925	-0.01665	-0.02412	0.004382	-0.0877	-0.08672	-0.04027	-0.04871	-0.02555	-0.00755	-0.02892	0.005227	-0.00553	-0.0139	0.010862		-0.02208	0.007735	0.016972	0.009732	0.020241	0.012096	0.005645	0.011494	0.031936	0.041172	0.033126	0.04243	-0.13978	-0.12052	-0.09962
140	-0.0288	-0.03439	-0.000908	0.002254	-0.01982	0.019033	-0.02439	0.009436	0.024023	0.016595	0.013087	-0.06996	-0.07691	-0.04433	-0.03411	-0.01688	-0.01561	-0.02094	0.010708	-0.01556	-0.023	0.005118	-0.08495	-0.08537	-0.03825	-0.0461	-0.02705	-0.00725	-0.02945	0.004225	-0.00481	-0.01302	0.010319		-0.0206	0.007852	0.017951	0.010918	0.020213	0.014421	0.009362	0.013052	0.034243	0.044914	0.036451	0.043845	-0.1391	-0.11675	-0.09889
141	-0.02974	-0.03524	-0.00142	0.001476	-0.02142	0.019401	-0.02588	0.008021	0.024042	0.016807	0.012383	-0.07243	-0.07937	-0.04662	-0.03635	-0.01798	-0.01577	-0.02223	0.009317	-0.01541	-0.02279	0.004216	-0.08517	-0.08601	-0.03936	-0.04609	-0.03055	-0.00849	-0.03237	0.001101	-0.00517	-0.01341	0.007288		-0.02309	0.003666	0.014769	0.007718	0.016015	0.016093	0.011795	0.014011	0.034901	0.047406	0.038127	0.044745	-0.13935	-0.11497	-0.09935
142	-0.03052	-0.03605	-0.00204	0.001163	-0.02055	0.020323	-0.02531	0.008253	0.025062	0.017987	0.013613	-0.07518	-0.08212	-0.04962	-0.03912	-0.01855	-0.0169	-0.02336	0.008978	-0.01636	-0.02358	0.002965	-0.08003	-0.08089	-0.03532	-0.04125	-0.03501	-0.01062	-0.03602	-0.00313	-0.00729	-0.0155	0.003444		-0.02469	0.001663	0.012905	0.005491	0.014279	0.015266	0.012336	0.013624	0.033652	0.047649	0.038095	0.043992	-0.13982	-0.1145	-0.1003
143	-0.02823	-0.03384	-5.29e-05	0.003231	-0.02	0.020123	-0.02511	0.007878	0.024796	0.017556	0.013637	-0.07553	-0.0825	-0.05009	-0.03975	-0.02254	-0.02329	-0.02821	0.005156	-0.02293	-0.03011	-0.002	-0.07564	-0.0776	-0.03261	-0.03844	-0.03951	-0.01341	-0.03918	-0.00676	-0.01024	-0.01847	-0.000382		-0.02223	0.00293	0.014913	0.007863	0.016277	0.012214	0.009982	0.010712	0.030541	0.045269	0.036268	0.041256	-0.13905	-0.11224	-0.09932
144	-0.02733	-0.03288	0.000663	0.003833	-0.01912	0.019657	-0.02399	0.008764	0.024003	0.016421	0.01404	-0.07735	-0.08424	-0.05216	-0.04168	-0.02257	-0.02604	-0.02878	0.005213	-0.02575	-0.03292	-0.00266	-0.07249	-0.07623	-0.0315	-0.03774	-0.0415	-0.0169	-0.04081	-0.00776	-0.01305	-0.02149	-0.00256		-0.0208	0.00321	0.015792	0.009424	0.017441	0.009444	0.007052	0.007842	0.02752	0.042844	0.034421	0.038434	-0.13964	-0.11032	-0.09994
145	-0.02613	-0.03174	0.001576	0.004471	-0.01584	0.02085	-0.02025	0.012482	0.024955	0.017221	0.016943	-0.08154	-0.08826	-0.05644	-0.04582	-0.01978	-0.02547	-0.02583	0.008279	-0.02504	-0.03228	-0.000323	-0.07357	-0.07892	-0.03393	-0.03994	-0.03957	-0.01898	-0.03977	-0.00566	-0.01429	-0.0227	-0.00192		-0.01902	0.00507	0.017779	0.011599	0.019368	0.008445	0.005905	0.007101	0.026978	0.041705	0.033655	0.037356	-0.14046	-0.10859	-0.10128
146	-0.02705	-0.03267	0.00071	0.00383	-0.01231	0.021098	-0.01614	0.016142	0.024958	0.017367	0.020358	-0.08417	-0.09075	-0.05921	-0.04898	-0.0173	-0.02419	-0.02267	0.011007	-0.02325	-0.03053	0.002257	-0.06963	-0.07508	-0.03089	-0.03543	-0.03429	-0.01756	-0.0358	-0.000583	-0.01215	-0.02045	0.001493		-0.01836	0.005584	0.018351	0.011908	0.019499	0.007441	0.005595	0.006938	0.026922	0.041136	0.033409	0.03649	-0.1391	-0.10545	-0.10014
147	-0.03016	-0.03597	-0.00186	0.00169	-0.01162	0.01817	-0.01529	0.016934	0.022139	0.01467	0.020423	-0.08726	-0.09377	-0.06251	-0.05251	-0.01751	-0.02333	-0.02234	0.011038	-0.02231	-0.02952	0.002754	-0.07542	-0.08001	-0.03672	-0.03919	-0.03038	-0.01406	-0.03216	0.00381	-0.00825	-0.01651	0.004793		-0.01946	0.004523	0.016895	0.010034	0.018517	0.00445	0.002129	0.004293	0.024434	0.037417	0.029709	0.033741	-0.14	-0.10531	-0.10086
148	-0.03191	-0.03781	-0.00354	0.000535	-0.01088	0.017055	-0.01494	0.017995	0.021167	0.013713	0.020369	-0.08984	-0.09606	-0.06524	-0.05507	-0.01609	-0.01977	-0.02125	0.012527	-0.01885	-0.02604	0.004336	-0.07827	-0.08313	-0.03982	-0.04126	-0.02686	-0.01193	-0.02865	0.008523	-0.0057	-0.014	0.008259		-0.01996	0.003744	0.016398	0.009119	0.018042	0.003176	-0.000561	0.002531	0.023137	0.035066	0.026985	0.032717	-0.14201	-0.10684	-0.10289
149	-0.03068	-0.03652	-0.00242	0.001527	-0.01069	0.018079	-0.01525	0.018582	0.022098	0.014777	0.02023	-0.09535	-0.10129	-0.07063	-0.0607	-0.01568	-0.01699	-0.02125	0.012906	-0.01631	-0.02344	0.004466	-0.08081	-0.08686	-0.04258	-0.04395	-0.02444	-0.01337	-0.02654	0.011953	-0.00677	-0.01508	0.010129		-0.01911	0.005969	0.017645	0.010034	0.020706	0.003292	-0.00222	0.001899	0.023523	0.034035	0.025656	0.032587	-0.14422	-0.10902	-0.10553
150	-0.03296	-0.03865	-0.0043	-0.000815	-0.0116	0.017154	-0.01738	0.017331	0.021175	0.014033	0.018815	-0.10258	-0.10837	-0.07786	-0.06841	-0.01352	-0.01497	-0.01946	0.014699	-0.01436	-0.02149	0.006107	-0.08581	-0.09203	-0.04738	-0.04897	-0.02519	-0.01608	-0.02797	0.011656	-0.00952	-0.01783	0.008358		-0.02155	0.00483	0.014749	0.008017	0.020503	0.005176	-0.0014	0.002838	0.024766	0.034842	0.026458	0.033543	-0.14647	-0.11003	-0.10802
[truncated: 21 more columns]

## Sheet: Panel Diii
	Control		aIC	pIC
Channel 1	-0.02	-0.01	-0.37	-0.03
Channel 2	-0.02	0.01	-0.37	-0.03
Channel 3	0.02	0.03	-0.31	0
Channel 4	0.02	0.02	-0.37	-0.02
Channel 5	-0.09	0.02	-0.52	-0.12
Channel 6	-0.02	0	-0.39	-0.1
Channel 7	-0.09	-0.01	-0.52	-0.08
Channel 8	-0.07	-0.01	-0.52	-0.13
Channel 9	-0.02	0	-0.38	-0.07
Channel 10	-0.03	0.02	-0.39	-0.05
Channel 11	-0.05	0.02	-0.52	-0.06
Channel 12		0.02		-0.08

## Sheet: Panel E
	STA - TZP				SFC - TZP
Panel E	i				ii
	Recall				Recall
peri-spike time (ms)	preCS	CS		Frequency (Hz)	preCS	CS
-0.15	-0.00188	0.001256		3.90625	0.00100004	0.00044627
-0.149	-0.001981	0.001011		5.85938	0.000993019	0.000419081
-0.148	-0.001977	0.000796		7.8125	0.000960329	0.00041742
-0.147	-0.001844	0.000617		9.76562	0.000957224	0.000444689
-0.146	-0.001586	0.000454		11.7188	0.00102317	0.000501767
-0.145	-0.001244	0.00027		13.6719	0.00032098	0.000374205
-0.144	-0.000891	3.28082e-05		15.625	4.97276e-06	0.000256402
-0.143	-0.000607	-0.000276		17.5781	0.000273206	0.000134101
-0.142	-0.000462	-0.000649		19.5312	0.00068701	4.3395e-05
-0.141	-0.000479	-0.001051		21.4844	0.000936699	2.2498e-05
-0.14	-0.000628	-0.001429		23.4375	0.000981311	4.71768e-05
-0.139	-0.000839	-0.001718		25.3906	0.000907102	4.76429e-05
-0.138	-0.001035	-0.001865		27.3438	0.000731737	3.69029e-05
-0.137	-0.001161	-0.001837		29.2969	0.000548799	4.95792e-05
-0.136	-0.001202	-0.001639		31.25	0.000379307	0.000152704
-0.135	-0.001182	-0.001312		33.2031	0.000322959	0.000420717
-0.134	-0.001147	-0.000919		35.1562	0.000513776	0.000818725
-0.133	-0.001142	-0.000534		37.1094	0.00103324	0.00111568
-0.132	-0.001187	-0.00021		39.0625	0.00166675	0.00128845
-0.131	-0.001269	2.66003e-05		41.0156	0.00213084	0.00129611
-0.13	-0.001353	0.000181		42.9688	0.00225079	0.00112485
-0.129	-0.0014	0.000281		44.9219	0.00196	0.000906194
-0.128	-0.001388	0.000356		46.875	0.00132898	0.000717586
-0.127	-0.001311	0.000424		48.8281	0.000743742	0.00051239
-0.126	-0.001174	0.000481		50.7812	0.000430773	0.000335008
-0.125	-0.000989	0.000499		52.7344	0.000349243	0.000201552
-0.124	-0.000777	0.00043		54.6875	0.000394325	0.000119474
-0.123	-0.000573	0.000232		56.6406	0.000440855	8.25277e-05
-0.122	-0.000407	-0.000109		58.5938	0.000372144	8.85724e-05
-0.121	-0.000299	-0.000563		60.5469	0.000262121	0.000128305
-0.12	-0.000243	-0.001055		62.5	0.0001734	0.000218516
-0.119	-0.000223	-0.001488		64.4531	0.000156051	0.000343949
-0.118	-0.000216	-0.001769		66.4062	0.000246353	0.000527225
-0.117	-0.000205	-0.001842		68.3594	0.000460077	0.000696207
-0.116	-0.000173	-0.001701		70.3125	0.00080055	0.00068972
-0.115	-9.91122e-05	-0.001382		72.2656	0.00109642	0.000604561
-0.114	3.60215e-05	-0.000952		74.2188	0.00121225	0.000510692
-0.113	0.000244	-0.000477		76.1719	0.00123905	0.000363175
-0.112	0.000524	-3.54631e-06		78.125	0.00107184	0.00022594
-0.111	0.000866	0.000445		80.0781	0.000807556	0.000154786
-0.11	0.00125	0.000862		82.0312	0.000533088	0.000106533
-0.109	0.001655	0.001234		83.9844	0.000264712	6.324e-05
-0.108	0.002056	0.00154		85.9375	7.3959e-05	2.4131e-05
-0.107	0.00243	0.001748		87.8906	7.6797e-05	1.06835e-05
-0.106	0.002749	0.001832		89.8438	0.000233842	4.30443e-05
-0.105	0.002982	0.001784		91.7969	0.000321998	0.000134983
-0.104	0.0031	0.001615		93.75	0.000230066	0.000287209
-0.103	0.003079	0.001346		95.7031	7.14054e-05	0.000438926
-0.102	0.002911	0.001006		97.6562	1.23146e-05	0.000320126
-0.101	0.002603	0.000622		99.6094	1.79768e-05	6.92158e-05
-0.1	0.00218	0.000222
-0.099	0.001681	-0.000159
-0.098	0.001157	-0.000483
-0.097	0.000665	-0.000711
-0.096	0.000253	-0.000822
-0.095	-3.56976e-05	-0.000821
-0.094	-0.000173	-0.000734
-0.093	-0.000141	-0.000601
-0.092	6.01445e-05	-0.000462
-0.091	0.000405	-0.000347
-0.09	0.000845	-0.00028
-0.089	0.001307	-0.00028
-0.088	0.001716	-0.000366
-0.087	0.002012	-0.000549
-0.086	0.002167	-0.000822
-0.085	0.002198	-0.001157
-0.084	0.002149	-0.001514
-0.083	0.002077	-0.001854
-0.082	0.002021	-0.002147
-0.081	0.001986	-0.00238
-0.08	0.001942	-0.002552
-0.079	0.001846	-0.002671
-0.078	0.001668	-0.002751
-0.077	0.001399	-0.002806
-0.076	0.001054	-0.002847
-0.075	0.000644	-0.002884
-0.074	0.000169	-0.002929
-0.073	-0.000372	-0.002981
-0.072	-0.000966	-0.003018
-0.071	-0.001567	-0.002996
-0.07	-0.002101	-0.002857
-0.069	-0.002492	-0.002559
-0.068	-0.002692	-0.002094
-0.067	-0.00271	-0.001502
-0.066	-0.002604	-0.000858
-0.065	-0.002452	-0.000254
-0.064	-0.002308	0.000233
-0.063	-0.002175	0.000571
-0.062	-0.002008	0.000772
-0.061	-0.001743	0.000875
-0.06	-0.001337	0.000924
-0.059	-0.000797	0.000945
-0.058	-0.000183	0.000949
-0.057	0.000408	0.00093
-0.056	0.000877	0.000881
-0.055	0.00114	0.000792
-0.054	0.001146	0.000659
-0.053	0.000887	0.000484
-0.052	0.000409	0.000277
-0.051	-0.000199	5.90202e-05
-0.05	-0.000823	-0.000143
-0.049	-0.001356	-0.000305
-0.048	-0.001724	-0.000417
-0.047	-0.001901	-0.000488
-0.046	-0.001903	-0.000542
-0.045	-0.001783	-0.000603
-0.044	-0.001609	-0.00068
-0.043	-0.001445	-0.000758
-0.042	-0.001333	-0.000796
-0.041	-0.001276	-0.00074
-0.04	-0.001247	-0.000547
-0.039	-0.001191	-0.000204
-0.038	-0.001053	0.00026
-0.037	-0.000787	0.000779
-0.036	-0.000378	0.001273
-0.035	0.000158	0.001666
-0.034	0.000774	0.001911
-0.033	0.001403	0.001987
-0.032	0.001962	0.001905
-0.031	0.002375	0.001694
-0.03	0.002582	0.001399
-0.029	0.002561	0.001069
-0.028	0.002335	0.000756
-0.027	0.001969	0.000497
-0.026	0.001551	0.000308
-0.025	0.001168	0.000184
-0.024	0.000877	0.000108
-0.023	0.000704	5.93385e-05
-0.022	0.000652	1.98685e-05
-0.021	0.00071	-2.25636e-05
-0.02	0.000872	-7.49633e-05
-0.019	0.001125	-0.000133
-0.018	0.001453	-0.000176
-0.017	0.001826	-0.000167
-0.016	0.002205	-6.0874e-05
-0.015	0.002551	0.000177
-0.014	0.002839	0.00056
-0.013	0.003072	0.001076
-0.012	0.003274	0.001684
-0.011	0.003478	0.002326
-0.01	0.003706	0.00294
-0.009	0.003964	0.003476
-0.008	0.004228	0.003896
-0.007	0.004454	0.004174
-0.006	0.004578	0.004284
-0.005	0.00453	0.0042
-0.004	0.004256	0.003901
-0.003	0.003732	0.003379
-0.002	0.002981	0.00266
-0.001	0.002071	0.001808
0	0.0011	0.000929
0.001	0.000175	0.000153
0.002	-0.000613	-0.000402
0.003	-0.0012	-0.000665
0.004	-0.001548	-0.000645
0.005	-0.001639	-0.000414
0.006	-0.001465	-7.68012e-05
0.007	-0.001032	0.000275
0.008	-0.00037	0.000596
0.009	0.00046	0.000884
0.01	0.001358	0.001158
0.011	0.002211	0.001433
0.012	0.002914	0.001702
0.013	0.003403	0.001939
0.014	0.003666	0.002118
0.015	0.003731	0.00223
0.016	0.003644	0.002278
0.017	0.003448	0.002268
0.018	0.00318	0.002198
0.019	0.002868	0.002056
0.02	0.002538	0.001827
0.021	0.002207	0.001513
0.022	0.001881	0.001126
0.023	0.001551	0.000694
0.024	0.001206	0.000241
0.025	0.000841	-0.000212
0.026	0.000464	-0.000645
0.027	9.95775e-05	-0.00104
0.028	-0.000219	-0.001366
0.029	-0.000462	-0.001597
0.03	-0.00061	-0.001714
0.031	-0.000664	-0.001728
0.032	-0.000648	-0.001666
0.033	-0.000604	-0.00156
0.034	-0.000578	-0.001429
0.035	-0.000609	-0.001275
0.036	-0.000713	-0.001087
0.037	-0.00088	-0.000866
0.038	-0.001081	-0.000636
0.039	-0.001286	-0.000447
0.04	-0.001476	-0.000355
0.041	-0.001656	-0.000398
0.042	-0.00185	-0.000573
0.043	-0.002089	-0.00084
0.044	-0.002396	-0.001143
0.045	-0.002764	-0.001426
0.046	-0.003159	-0.001661
0.047	-0.003529	-0.001842
0.048	-0.003831	-0.001978
0.049	-0.004051	-0.002081
0.05	-0.00421	-0.002153
0.051	-0.004343	-0.002191
0.052	-0.004482	-0.002191
0.053	-0.004629	-0.002157
0.054	-0.00476	-0.002098
0.055	-0.004837	-0.002027
0.056	-0.004829	-0.00195
0.057	-0.004731	-0.001873
0.058	-0.004558	-0.001798
0.059	-0.004338	-0.001729
0.06	-0.004096	-0.001675
0.061	-0.003846	-0.001644
0.062	-0.00359	-0.001637
0.063	-0.003325	-0.001633
0.064	-0.003048	-0.001599
0.065	-0.002764	-0.001501
0.066	-0.002498	-0.001327
0.067	-0.002295	-0.001103
0.068	-0.002203	-0.000878
0.069	-0.002261	-0.000709
0.07	-0.002471	-0.000626
0.071	-0.002788	-0.000617
0.072	-0.003128	-0.000631
0.073	-0.003399	-0.000605
0.074	-0.003532	-0.000501
0.075	-0.003501	-0.000324
0.076	-0.003323	-0.000125
0.077	-0.003047	2.99899e-05
0.078	-0.002728	9.58043e-05
0.079	-0.002405	7.27457e-05
0.08	-0.002091	8.24375e-06
0.081	-0.001772	-2.68272e-05
0.082	-0.001418	2.72299e-05
0.083	-0.001008	0.000192
0.084	-0.000541	0.000448
0.085	-5.18281e-05	0.000749
0.086	0.000402	0.001049
0.087	0.000762	0.00132
0.088	0.000986	0.001554
0.089	0.001068	0.001759
0.09	0.001029	0.001937
0.091	0.000905	0.002081
0.092	0.000736	0.002169
0.093	0.000558	0.002174
0.094	0.000396	0.002074
0.095	0.000276	0.001862
0.096	0.000215	0.00155
0.097	0.000229	0.001167
0.098	0.000316	0.000755
0.099	0.000465	0.00035
0.1	0.000651	-2.18547e-05
0.101	0.000844	-0.000349
0.102	0.001013	-0.000626
0.103	0.001138	-0.000842
0.104	0.001209	-0.000979
0.105	0.001233	-0.001021
0.106	0.00123	-0.000969
0.107	0.001227	-0.000842
0.108	0.001249	-0.00067
0.109	0.001318	-0.000485
0.11	0.001442	-0.000309
0.111	0.001615	-0.000144
0.112	0.001819	2.55502e-05
0.113	0.002024	0.000222
0.114	0.002189	0.000461
0.115	0.002276	0.000744
0.116	0.002261	0.001045
0.117	0.00214	0.001316
0.118	0.001932	0.001498
0.119	0.001659	0.001542
0.12	0.001339	0.001432
0.121	0.00098	0.001199
0.122	0.000583	0.000903
0.123	0.000165	0.000611
0.124	-0.000243	0.000366
0.125	-0.000595	0.000176
0.126	-0.000849	1.28764e-05
0.127	-0.000984	-0.00016
0.128	-0.001003	-0.000361
0.129	-0.000923	-0.000573
0.13	-0.000764	-0.000746
0.131	-0.00054	-0.000817
0.132	-0.000267	-0.000739
0.133	2.73823e-05	-0.000505
0.134	0.000303	-0.000157
0.135	0.000513	0.00023
0.136	0.000618	0.000573
0.137	0.000606	0.000815
0.138	0.00049	0.000949
0.139	0.000306	0.00101
0.14	9.56803e-05	0.00106
0.141	-0.000104	0.001151
0.142	-0.00027	0.001304
0.143	-0.000397	0.001498
0.144	-0.000488	0.001679
0.145	-0.000554	0.001784
0.146	-0.000606	0.001762
0.147	-0.000648	0.001596
0.148	-0.000677	0.001307
0.149	-0.000683	0.000945
