# Supplementary material for: The amygdala instructs insular feedback for affective learning
Source: eLife. 2020 Nov 20;9:e60336. doi: 10.7554/eLife.60336 (PMC7679142; doi:10.7554/eLife.60336)
Supplement: Figure 5—source data 1. — Bold rows indicate neurons used as ‘best neurons’ in Figure 5E and Figure 5—figure supplement 5. [file elife-60336-fig5-data1.xlsx]

## Sheet: Single-neuron decoding
Population	Stage	Treatment/Time point	Task	CS	MouseID	NeuronID	Accuracy	SEM	N(iterations)
SST	habituation	PBS	CS	F-CS	S4	ictrace6	0.590357	0.00563008	200
SST	habituation	PBS	CS	F-CS	S2	ictrace22	0.549821	0.00352155	200
SST	habituation	PBS	CS	F-CS	S2	ictrace11	0.542857	0.00404061	200
SST	habituation	PBS	CS	F-CS	S2	ictrace15	0.539762	0.00417893	200
SST	habituation	PBS	CS	F-CS	S2	ictrace13	0.535655	0.00290571	200
SST	habituation	PBS	CS	F-CS	S2	ictrace7	0.535119	0.0027248	200
SST	habituation	PBS	CS	F-CS	S2	ictrace29	0.530952	0.00269374	200
SST	habituation	PBS	CS	F-CS	S2	ictrace10	0.523631	0.00341988	200
SST	habituation	PBS	CS	F-CS	S2	ictrace25	0.517857	0.00266332	200
SST	habituation	PBS	CS	F-CS	S4	ictrace7	0.516607	0.00275731	200
SST	habituation	PBS	CS	F-CS	S2	ictrace9	0.515714	0.00232335	200
SST	habituation	PBS	CS	F-CS	S2	ictrace18	0.510595	0.00407361	200
SST	habituation	PBS	CS	F-CS	S2	ictrace2	0.505655	0.00384096	200
SST	habituation	PBS	CS	F-CS	S4	ictrace8	0.505	0.00217626	200
SST	habituation	PBS	CS	F-CS	S4	ictrace3	0.501071	0.00155491	200
SST	habituation	PBS	CS	F-CS	S2	ictrace8	0.500714	0.00112825	200
SST	habituation	PBS	CS	F-CS	S4	ictrace5	0.500298	0.000968749	200
SST	habituation	PBS	CS	F-CS	S2	ictrace16	0.5	0	200
SST	habituation	PBS	CS	F-CS	S4	ictrace10	0.499643	0.000618074	200
SST	habituation	PBS	CS	F-CS	S2	ictrace21	0.499524	0.00159905	200
SST	habituation	PBS	CS	F-CS	S2	ictrace19	0.499345	0.00162838	200
SST	habituation	PBS	CS	F-CS	S4	ictrace4	0.499286	0.00100889	200
SST	habituation	PBS	CS	F-CS	S2	ictrace4	0.498333	0.00155456	200
SST	habituation	PBS	CS	F-CS	S4	ictrace12	0.497679	0.00414082	200
SST	habituation	PBS	CS	F-CS	S2	ictrace1	0.492857	0.00339233	200
SST	habituation	PBS	CS	F-CS	S2	ictrace12	0.492202	0.00233982	200
SST	habituation	PBS	CS	F-CS	S4	ictrace1	0.49125	0.00307742	200
SST	habituation	PBS	CS	F-CS	S2	ictrace17	0.480714	0.00296971	200
SST	habituation	PBS	CS	F-CS	S4	ictrace14	0.479464	0.00295341	200
SST	habituation	PBS	CS	F-CS	S2	ictrace5	0.478512	0.00307422	200
SST	habituation	PBS	CS	F-CS	S2	ictrace3	0.477321	0.00285664	200
SST	habituation	PBS	CS	F-CS	S2	ictrace6	0.474464	0.00276949	200
SST	habituation	PBS	CS	F-CS	S2	ictrace24	0.473333	0.00265831	200
SST	habituation	PBS	CS	F-CS	S4	ictrace9	0.470298	0.00409461	200
SST	habituation	PBS	CS	F-CS	S2	ictrace14	0.4675	0.00346233	200
SST	habituation	PBS	CS	F-CS	S4	ictrace2	0.456012	0.00444575	200
SST	habituation	PBS	CS	R-CS	S4	ictrace2	0.566488	0.00376205	200
SST	habituation	PBS	CS	R-CS	S2	ictrace8	0.52256	0.00265185	200
SST	habituation	PBS	CS	R-CS	S4	ictrace4	0.518571	0.0023819	200
SST	habituation	PBS	CS	R-CS	S4	ictrace3	0.506131	0.00193059	200
SST	habituation	PBS	CS	R-CS	S2	ictrace1	0.505893	0.00207225	200
SST	habituation	PBS	CS	R-CS	S2	ictrace4	0.504167	0.001932	200
SST	habituation	PBS	CS	R-CS	S4	ictrace5	0.504167	0.001932	200
SST	habituation	PBS	CS	R-CS	S2	ictrace16	0.5025	0.00381472	200
SST	habituation	PBS	CS	R-CS	S2	ictrace2	0.501429	0.001425	200
SST	habituation	PBS	CS	R-CS	S2	ictrace18	0.50125	0.00181406	200
SST	habituation	PBS	CS	R-CS	S2	ictrace24	0.501071	0.00155491	200
SST	habituation	PBS	CS	R-CS	S2	ictrace6	0.501071	0.00118208	200
SST	habituation	PBS	CS	R-CS	S4	ictrace10	0.501071	0.00155491	200
SST	habituation	PBS	CS	R-CS	S2	ictrace15	0.500833	0.00212377	200
SST	habituation	PBS	CS	R-CS	S2	ictrace13	0.500417	0.00171771	200
SST	habituation	PBS	CS	R-CS	S2	ictrace3	0.5	0	200
SST	habituation	PBS	CS	R-CS	S4	ictrace9	0.5	0	200
SST	habituation	PBS	CS	R-CS	S2	ictrace21	0.499583	0.00161347	200
SST	habituation	PBS	CS	R-CS	S2	ictrace7	0.498333	0.00185966	200
SST	habituation	PBS	CS	R-CS	S2	ictrace22	0.497917	0.00181022	200
SST	habituation	PBS	CS	R-CS	S2	ictrace12	0.4975	0.00137187	200
SST	habituation	PBS	CS	R-CS	S4	ictrace6	0.49506	0.00273457	200
SST	habituation	PBS	CS	R-CS	S4	ictrace14	0.492738	0.00184003	200
SST	habituation	PBS	CS	R-CS	S4	ictrace8	0.492262	0.00335848	200
SST	habituation	PBS	CS	R-CS	S2	ictrace17	0.486607	0.00311798	200
SST	habituation	PBS	CS	R-CS	S4	ictrace7	0.486369	0.00237857	200
SST	habituation	PBS	CS	R-CS	S2	ictrace9	0.485833	0.00358963	200
SST	habituation	PBS	CS	R-CS	S2	ictrace5	0.485	0.00255223	200
SST	habituation	PBS	CS	R-CS	S2	ictrace11	0.47994	0.00289848	200
SST	habituation	PBS	CS	R-CS	S2	ictrace29	0.477857	0.00238992	200
SST	habituation	PBS	CS	R-CS	S4	ictrace1	0.477143	0.00240959	200
SST	habituation	PBS	CS	R-CS	S2	ictrace14	0.472917	0.00275993	200
SST	habituation	PBS	CS	R-CS	S4	ictrace12	0.466964	0.00358572	200
SST	habituation	PBS	CS	R-CS	S2	ictrace19	0.447976	0.00443467	200
SST	habituation	PBS	CS discrimination	-	S4	ictrace14	0.69707	0.0122853	200
SST	habituation	PBS	CS discrimination	-	S3	ictrace6	0.690482	0.0112657	200
SST	habituation	PBS	CS discrimination	-	S3	ictrace4	0.687959	0.012176	200
SST	habituation	PBS	CS discrimination	-	S3	ictrace9	0.679594	0.0168334	200
SST	habituation	PBS	CS discrimination	-	S3	ictrace21	0.676396	0.0107779	200
SST	habituation	PBS	CS discrimination	-	S4	ictrace4	0.657585	0.0144658	200
SST	habituation	PBS	CS discrimination	-	S4	ictrace7	0.654493	0.0152073	200
SST	habituation	PBS	CS discrimination	-	S4	ictrace12	0.650848	0.0155894	200
SST	habituation	PBS	CS discrimination	-	S4	ictrace10	0.650105	0.0100854	200
SST	habituation	PBS	CS discrimination	-	S4	ictrace1	0.629904	0.00784227	200
SST	habituation	PBS	CS discrimination	-	S4	ictrace3	0.627458	0.00803306	200
SST	habituation	PBS	CS discrimination	-	S3	ictrace17	0.617889	0.0102438	200
SST	habituation	PBS	CS discrimination	-	S4	ictrace8	0.609492	0.00649275	200
SST	habituation	PBS	CS discrimination	-	S3	ictrace15	0.60666	0.00888987	200
SST	habituation	PBS	CS discrimination	-	S3	ictrace1	0.601743	0.00536328	200
SST	habituation	PBS	CS discrimination	-	S4	ictrace9	0.601266	0.00683324	200
SST	habituation	PBS	CS discrimination	-	S3	ictrace16	0.600316	0.00508009	200
SST	habituation	PBS	CS discrimination	-	S3	ictrace29	0.596642	0.00618383	200
SST	habituation	PBS	CS discrimination	-	S3	ictrace24	0.595166	0.00541921	200
SST	habituation	PBS	CS discrimination	-	S3	ictrace8	0.594274	0.0192743	200
SST	habituation	PBS	CS discrimination	-	S4	ictrace5	0.592364	0.00785751	200
SST	habituation	PBS	CS discrimination	-	S4	ictrace2	0.57905	0.00590313	200
SST	habituation	PBS	CS discrimination	-	S3	ictrace11	0.57222	0.00998441	200
SST	habituation	PBS	CS discrimination	-	S3	ictrace5	0.567825	0.0133009	200
SST	habituation	PBS	CS discrimination	-	S3	ictrace12	0.549397	0.0115187	200
SST	habituation	PBS	CS discrimination	-	S3	ictrace14	0.544391	0.0160359	200
SST	habituation	PBS	CS discrimination	-	S3	ictrace3	0.536975	0.0136282	200
SST	habituation	PBS	CS discrimination	-	S3	ictrace19	0.528576	0.0169585	200
SST	habituation	PBS	CS discrimination	-	S3	ictrace18	0.495206	0.01942	200
SST	habituation	PBS	CS discrimination	-	S3	ictrace2	0.494626	0.0186914	200
SST	habituation	PBS	CS discrimination	-	S3	ictrace25	0.467604	0.017807	200
SST	habituation	PBS	CS discrimination	-	S3	ictrace7	0.448739	0.0165397	200
SST	habituation	PBS	CS discrimination	-	S3	ictrace13	0.442535	0.017063	200
SST	habituation	PBS	CS discrimination	-	S3	ictrace10	0.376038	0.0174208	200
SST	habituation	PBS	CS discrimination	-	S3	ictrace22	0.37217	0.0177812	200
SST	habituation	PBS	CS discrimination	-	S4	ictrace6	0.309004	0.0172276	200
SST	habituation	aIC inhibition	CS	F-CS	S2	ictrace20	0.566667	0.0057735	200
SST	habituation	aIC inhibition	CS	F-CS	S2	ictrace12	0.536458	0.0051953	200
SST	habituation	aIC inhibition	CS	F-CS	S2	ictrace1	0.514167	0.0059544	200
SST	habituation	aIC inhibition	CS	F-CS	S2	ictrace16	0.503333	0.00310913	200
SST	habituation	aIC inhibition	CS	F-CS	S2	ictrace6	0.503333	0.00352767	200
SST	habituation	aIC inhibition	CS	F-CS	S2	ictrace7	0.500833	0.00343542	200
SST	habituation	aIC inhibition	CS	F-CS	S2	ictrace13	0.5	0	200
SST	habituation	aIC inhibition	CS	F-CS	S2	ictrace18	0.5	0	200
SST	habituation	aIC inhibition	CS	F-CS	S2	ictrace2	0.5	0	200
SST	habituation	aIC inhibition	CS	F-CS	S2	ictrace22	0.5	0.00333333	200
SST	habituation	aIC inhibition	CS	F-CS	S2	ictrace4	0.5	0	200
SST	habituation	aIC inhibition	CS	F-CS	S2	ictrace10	0.4975	0.00322264	200
SST	habituation	aIC inhibition	CS	F-CS	S2	ictrace19	0.4975	0.00416291	200
SST	habituation	aIC inhibition	CS	F-CS	S2	ictrace8	0.495	0.00291011	200
SST	habituation	aIC inhibition	CS	F-CS	S2	ictrace3	0.4925	0.00413278	200
SST	habituation	aIC inhibition	CS	F-CS	S2	ictrace9	0.460208	0.00618225	200
SST	habituation	aIC inhibition	CS	F-CS	S2	ictrace17	0.450208	0.00497997	200
SST	habituation	aIC inhibition	CS	F-CS	S2	ictrace14	0.426667	0.00662906	200
SST	habituation	aIC inhibition	CS	R-CS	S2	ictrace15	0.545	0.003937	200
SST	habituation	aIC inhibition	CS	R-CS	S2	ictrace6	0.5265	0.003277	200
SST	habituation	aIC inhibition	CS	R-CS	S2	ictrace14	0.5235	0.00308038	200
SST	habituation	aIC inhibition	CS	R-CS	S2	ictrace18	0.5205	0.00310624	200
SST	habituation	aIC inhibition	CS	R-CS	S2	ictrace5	0.5015	0.00228883	200
SST	habituation	aIC inhibition	CS	R-CS	S2	ictrace8	0.50125	0.00279369	200
SST	habituation	aIC inhibition	CS	R-CS	S2	ictrace4	0.501	0.00212014	200
SST	habituation	aIC inhibition	CS	R-CS	S2	ictrace10	0.5	0	200
SST	habituation	aIC inhibition	CS	R-CS	S2	ictrace11	0.5	0	200
SST	habituation	aIC inhibition	CS	R-CS	S2	ictrace22	0.5	0	200
SST	habituation	aIC inhibition	CS	R-CS	S2	ictrace3	0.5	0	200
SST	habituation	aIC inhibition	CS	R-CS	S2	ictrace9	0.5	0	200
SST	habituation	aIC inhibition	CS	R-CS	S2	ictrace16	0.49875	0.00249844	200
SST	habituation	aIC inhibition	CS	R-CS	S2	ictrace1	0.4985	0.00205882	200
SST	habituation	aIC inhibition	CS	R-CS	S2	ictrace12	0.4975	0.0019685	200
SST	habituation	aIC inhibition	CS	R-CS	S2	ictrace19	0.485625	0.00464502	200
SST	habituation	aIC inhibition	CS	R-CS	S2	ictrace17	0.473875	0.00398551	200
SST	habituation	aIC inhibition	CS	R-CS	S2	ictrace7	0.464875	0.00374624	200
SST	habituation	aIC inhibition	CS	R-CS	S2	ictrace20	0.458875	0.00387257	200
SST	habituation	aIC inhibition	CS discrimination	-	S3	ictrace16	0.725391	0.012849	200
SST	habituation	aIC inhibition	CS discrimination	-	S3	ictrace7	0.700402	0.0121834	200
SST	habituation	aIC inhibition	CS discrimination	-	S3	ictrace14	0.691964	0.0164137	200
SST	habituation	aIC inhibition	CS discrimination	-	S3	ictrace17	0.67563	0.0138044	200
SST	habituation	aIC inhibition	CS discrimination	-	S3	ictrace2	0.659643	0.00783921	200
SST	habituation	aIC inhibition	CS discrimination	-	S3	ictrace4	0.654471	0.00773327	200
SST	habituation	aIC inhibition	CS discrimination	-	S3	ictrace3	0.65183	0.0073444	200
SST	habituation	aIC inhibition	CS discrimination	-	S3	ictrace22	0.650807	0.00722386	200
SST	habituation	aIC inhibition	CS discrimination	-	S3	ictrace15	0.648285	0.00791776	200
SST	habituation	aIC inhibition	CS discrimination	-	S3	ictrace13	0.646698	0.00742929	200
SST	habituation	aIC inhibition	CS discrimination	-	S3	ictrace19	0.646648	0.0093284	200
SST	habituation	aIC inhibition	CS discrimination	-	S3	ictrace8	0.63586	0.00783052	200
SST	habituation	aIC inhibition	CS discrimination	-	S3	ictrace10	0.633857	0.013759	200
SST	habituation	aIC inhibition	CS discrimination	-	S3	ictrace20	0.629481	0.00820192	200
SST	habituation	aIC inhibition	CS discrimination	-	S3	ictrace5	0.628686	0.00760678	200
SST	habituation	aIC inhibition	CS discrimination	-	S3	ictrace11	0.618486	0.00713923	200
SST	habituation	aIC inhibition	CS discrimination	-	S3	ictrace12	0.599033	0.0212388	200
SST	habituation	aIC inhibition	CS discrimination	-	S3	ictrace6	0.559221	0.0163245	200
SST	habituation	aIC inhibition	CS discrimination	-	S3	ictrace9	0.532063	0.0172949	200
SST	habituation	aIC inhibition	CS discrimination	-	S3	ictrace18	0.520574	0.0179074	200
SST	habituation	aIC inhibition	CS discrimination	-	S3	ictrace1	0.437039	0.0193329	200
SST	RC	early	CS	R-CS	S3	ictrace7	0.53002	0.00170477	200
SST	RC	early	CS	R-CS	S2	ictrace10	0.524868	0.00148162	200
SST	RC	early	CS	R-CS	S3	ictrace10	0.522632	0.00213823	200
SST	RC	early	CS	R-CS	S4	ictrace8	0.520789	0.00138802	200
SST	RC	early	CS	R-CS	S3	ictrace9	0.520526	0.00133356	200
SST	RC	early	CS	R-CS	S4	ictrace16	0.518829	0.00197477	200
SST	RC	early	CS	R-CS	S2	ictrace13	0.51752	0.0016309	200
SST	RC	early	CS	R-CS	S3	ictrace1	0.517105	0.00169272	200
SST	RC	early	CS	R-CS	S2	ictrace9	0.514829	0.00247774	200
SST	RC	early	CS	R-CS	S1	ictrace4	0.512763	0.00101967	200
SST	RC	early	CS	R-CS	S2	ictrace7	0.511842	0.00092574	200
SST	RC	early	CS	R-CS	S4	ictrace2	0.510724	0.00196872	200
SST	RC	early	CS	R-CS	S1	ictrace3	0.510638	0.00247347	200
SST	RC	early	CS	R-CS	S3	ictrace14	0.510263	0.00132614	200
SST	RC	early	CS	R-CS	S2	ictrace8	0.507947	0.00125338	200
SST	RC	early	CS	R-CS	S2	ictrace11	0.506921	0.000846986	200
SST	RC	early	CS	R-CS	S4	ictrace15	0.506796	0.000842813	200
SST	RC	early	CS	R-CS	S4	ictrace11	0.505651	0.00166422	200
SST	RC	early	CS	R-CS	S2	ictrace17	0.503684	0.00161194	200
SST	RC	early	CS	R-CS	S2	ictrace14	0.503039	0.0012399	200
SST	RC	early	CS	R-CS	S2	ictrace15	0.503026	0.00168686	200
SST	RC	early	CS	R-CS	S3	ictrace3	0.502691	0.00207816	200
SST	RC	early	CS	R-CS	S3	ictrace4	0.502579	0.0025933	200
SST	RC	early	CS	R-CS	S3	ictrace8	0.502105	0.00205836	200
SST	RC	early	CS	R-CS	S4	ictrace1	0.501434	0.00184619	200
SST	RC	early	CS	R-CS	S1	ictrace5	0.500263	0.000455423	200
SST	RC	early	CS	R-CS	S1	ictrace6	0.5	0	200
SST	RC	early	CS	R-CS	S3	ictrace2	0.499605	0.000347004	200
SST	RC	early	CS	R-CS	S3	ictrace12	0.499539	0.00155694	200
SST	RC	early	CS	R-CS	S4	ictrace7	0.499211	0.000555444	200
SST	RC	early	CS	R-CS	S2	ictrace6	0.499092	0.000631126	200
SST	RC	early	CS	R-CS	S3	ictrace18	0.498684	0.000550434	200
SST	RC	early	CS	R-CS	S4	ictrace4	0.497947	0.00158578	200
SST	RC	early	CS	R-CS	S4	ictrace18	0.496842	0.00143608	200
SST	RC	early	CS	R-CS	S4	ictrace10	0.49652	0.00111244	200
SST	RC	early	CS	R-CS	S3	ictrace5	0.495132	0.00152402	200
SST	RC	early	CS	R-CS	S3	ictrace17	0.494855	0.000997365	200
SST	RC	early	CS	R-CS	S4	ictrace14	0.493947	0.000924992	200
SST	RC	early	CS	R-CS	S1	ictrace2	0.49373	0.00154607	200
SST	RC	early	CS	R-CS	S3	ictrace20	0.492237	0.000926628	200
SST	RC	early	CS	R-CS	S4	ictrace5	0.492105	0.000930404	200
SST	RC	early	CS	R-CS	S4	ictrace3	0.491539	0.000911725	200
SST	RC	early	CS	R-CS	S3	ictrace19	0.490349	0.00159467	200
SST	RC	early	CS	R-CS	S2	ictrace2	0.489875	0.00130861	200
SST	RC	early	CS	R-CS	S4	ictrace13	0.486836	0.0012902	200
SST	RC	early	CS	R-CS	S4	ictrace6	0.486579	0.00150826	200
SST	RC	early	CS	R-CS	S1	ictrace7	0.485967	0.00165435	200
SST	RC	early	CS	R-CS	S3	ictrace11	0.485625	0.00183502	200
SST	RC	early	CS	R-CS	S4	ictrace9	0.484605	0.0014447	200
SST	RC	early	CS	R-CS	S1	ictrace1	0.483289	0.00224623	200
SST	RC	early	CS	R-CS	S3	ictrace16	0.481914	0.00273741	200
SST	RC	early	CS	R-CS	S3	ictrace15	0.481447	0.00289487	200
SST	RC	early	CS	R-CS	S3	ictrace6	0.469461	0.00249068	200
SST	RC	early	US	R-CS	S3	ictrace6	0.6475	0.0154303	200
SST	RC	early	US	R-CS	S3	ictrace11	0.62	0.0145731	200
SST	RC	early	US	R-CS	S3	ictrace15	0.535	0.0082991	200
SST	RC	early	US	R-CS	S1	ictrace2	0.51	0.007673	200
SST	RC	early	US	R-CS	S3	ictrace10	0.51	0.00608276	200
SST	RC	early	US	R-CS	S4	ictrace6	0.51	0.00633443	200
SST	RC	early	US	R-CS	S1	ictrace3	0.50875	0.00409935	200
SST	RC	early	US	R-CS	S4	ictrace3	0.50875	0.00480153	200
SST	RC	early	US	R-CS	S1	ictrace5	0.5075	0.00429753	200
SST	RC	early	US	R-CS	S2	ictrace6	0.5075	0.00349553	200
SST	RC	early	US	R-CS	S3	ictrace1	0.5075	0.00464691	200
SST	RC	early	US	R-CS	S4	ictrace8	0.5075	0.00429753	200
SST	RC	early	US	R-CS	S2	ictrace15	0.50625	0.00275993	200
SST	RC	early	US	R-CS	S4	ictrace15	0.50625	0.00623436	200
SST	RC	early	US	R-CS	S1	ictrace1	0.505	0.00585235	200
SST	RC	early	US	R-CS	S2	ictrace10	0.505	0.00466369	200
SST	RC	early	US	R-CS	S3	ictrace3	0.505	0.00611351	200
SST	RC	early	US	R-CS	S4	ictrace11	0.505	0.00498748	200
SST	RC	early	US	R-CS	S4	ictrace4	0.505	0.00351781	200
SST	RC	early	US	R-CS	S2	ictrace17	0.50375	0.00278248	200
SST	RC	early	US	R-CS	S3	ictrace14	0.50375	0.00278248	200
SST	RC	early	US	R-CS	S3	ictrace16	0.50375	0.00278248	200
SST	RC	early	US	R-CS	S1	ictrace7	0.5025	0.00305675	200
SST	RC	early	US	R-CS	S2	ictrace2	0.5025	0.00305675	200
SST	RC	early	US	R-CS	S3	ictrace4	0.5025	0.00530035	200
SST	RC	early	US	R-CS	S4	ictrace16	0.5025	0.00175891	200
SST	RC	early	US	R-CS	S4	ictrace5	0.5025	0.00394889	200
SST	RC	early	US	R-CS	S4	ictrace9	0.5025	0.00175891	200
SST	RC	early	US	R-CS	S3	ictrace17	0.50125	0.00124687	200
SST	RC	early	US	R-CS	S3	ictrace9	0.50125	0.00124687	200
SST	RC	early	US	R-CS	S4	ictrace2	0.50125	0.00216326	200
SST	RC	early	US	R-CS	S1	ictrace6	0.5	0.00353553	200
SST	RC	early	US	R-CS	S2	ictrace14	0.5	0.00176777	200
SST	RC	early	US	R-CS	S3	ictrace18	0.5	0	200
SST	RC	early	US	R-CS	S3	ictrace20	0.5	0.00353553	200
SST	RC	early	US	R-CS	S4	ictrace10	0.5	0	200
SST	RC	early	US	R-CS	S4	ictrace18	0.5	0.00353553	200
SST	RC	early	US	R-CS	S2	ictrace7	0.49875	0.00279369	200
SST	RC	early	US	R-CS	S4	ictrace13	0.49875	0.00124687	200
SST	RC	early	US	R-CS	S1	ictrace4	0.4975	0.0118572	200
SST	RC	early	US	R-CS	S2	ictrace13	0.4975	0.00432652	200
SST	RC	early	US	R-CS	S4	ictrace14	0.4975	0.00432652	200
SST	RC	early	US	R-CS	S4	ictrace7	0.4975	0.00249374	200
SST	RC	early	US	R-CS	S4	ictrace1	0.49625	0.00514706	200
SST	RC	early	US	R-CS	S2	ictrace8	0.495	0.00351781	200
SST	RC	early	US	R-CS	S3	ictrace2	0.495	0.00304138	200
SST	RC	early	US	R-CS	S3	ictrace8	0.495	0.00351781	200
SST	RC	early	US	R-CS	S2	ictrace11	0.49375	0.00543067	200
SST	RC	early	US	R-CS	S3	ictrace12	0.4775	0.00813749	200
SST	RC	early	US	R-CS	S2	ictrace9	0.4725	0.00702451	200
SST	RC	early	US	R-CS	S3	ictrace19	0.45875	0.0093169	200
SST	RC	early	US	R-CS	S3	ictrace7	0.45375	0.0117364	200
SST	RC	early	US	R-CS	S3	ictrace5	0.4475	0.0142072	200
SST	RC	late	CS	R-CS	S4	ictrace6	0.527237	0.00252019	200
SST	RC	late	CS	R-CS	S2	ictrace29	0.524079	0.00217625	200
SST	RC	late	CS	R-CS	S3	ictrace2	0.521572	0.00114832	200
SST	RC	late	CS	R-CS	S2	ictrace7	0.521053	0.0013925	200
SST	RC	late	CS	R-CS	S2	ictrace3	0.520526	0.00133356	200
SST	RC	late	CS	R-CS	S2	ictrace23	0.517178	0.0017788	200
SST	RC	late	CS	R-CS	S2	ictrace35	0.517164	0.000881102	200
SST	RC	late	CS	R-CS	S4	ictrace8	0.51625	0.00298532	200
SST	RC	late	CS	R-CS	S1	ictrace3	0.516053	0.00127285	200
SST	RC	late	CS	R-CS	S2	ictrace27	0.513757	0.00176786	200
SST	RC	late	CS	R-CS	S2	ictrace2	0.513461	0.00185656	200
SST	RC	late	CS	R-CS	S2	ictrace19	0.510526	0.000911606	200
SST	RC	late	CS	R-CS	S4	ictrace2	0.509967	0.00263116	200
SST	RC	late	CS	R-CS	S3	ictrace1	0.508026	0.000896235	200
SST	RC	late	CS	R-CS	S4	ictrace3	0.507211	0.00110632	200
SST	RC	late	CS	R-CS	S2	ictrace22	0.506842	0.000877544	200
SST	RC	late	CS	R-CS	S2	ictrace5	0.506789	0.000862391	200
SST	RC	late	CS	R-CS	S2	ictrace33	0.506632	0.00190294	200
SST	RC	late	CS	R-CS	S2	ictrace14	0.506316	0.000916152	200
SST	RC	late	CS	R-CS	S2	ictrace6	0.506105	0.00202082	200
SST	RC	late	CS	R-CS	S2	ictrace25	0.505974	0.00141662	200
SST	RC	late	CS	R-CS	S2	ictrace12	0.505355	0.00184402	200
SST	RC	late	CS	R-CS	S4	ictrace17	0.505243	0.00147962	200
SST	RC	late	CS	R-CS	S2	ictrace4	0.504842	0.00134255	200
SST	RC	late	CS	R-CS	S1	ictrace2	0.504743	0.00136968	200
SST	RC	late	CS	R-CS	S2	ictrace10	0.502757	0.00128495	200
SST	RC	late	CS	R-CS	S2	ictrace21	0.502309	0.000742314	200
SST	RC	late	CS	R-CS	S4	ictrace4	0.502105	0.00165769	200
SST	RC	late	CS	R-CS	S2	ictrace17	0.501586	0.00129073	200
SST	RC	late	CS	R-CS	S4	ictrace14	0.5015	0.00111299	200
SST	RC	late	CS	R-CS	S4	ictrace9	0.500395	0.00115426	200
SST	RC	late	CS	R-CS	S2	ictrace11	0.50025	0.000467373	200
SST	RC	late	CS	R-CS	S1	ictrace1	0.500132	0.000436299	200
SST	RC	late	CS	R-CS	S2	ictrace1	0.5	0.000467707	200
SST	RC	late	CS	R-CS	S4	ictrace7	0.5	0.000353553	200
SST	RC	late	CS	R-CS	S2	ictrace16	0.499605	0.000435504	200
SST	RC	late	CS	R-CS	S2	ictrace8	0.49925	0.000583899	200
SST	RC	late	CS	R-CS	S4	ictrace11	0.496145	0.00168792	200
SST	RC	late	CS	R-CS	S1	ictrace6	0.496013	0.000749648	200
SST	RC	late	CS	R-CS	S2	ictrace31	0.494105	0.00104632	200
SST	RC	late	CS	R-CS	S2	ictrace15	0.493717	0.000915228	200
SST	RC	late	CS	R-CS	S2	ictrace34	0.492434	0.000907263	200
SST	RC	late	CS	R-CS	S4	ictrace12	0.492368	0.000959534	200
SST	RC	late	CS	R-CS	S2	ictrace32	0.49177	0.00111326	200
SST	RC	late	CS	R-CS	S4	ictrace5	0.490921	0.000941456	200
SST	RC	late	CS	R-CS	S2	ictrace20	0.489987	0.00109237	200
SST	RC	late	CS	R-CS	S2	ictrace30	0.489336	0.00125843	200
SST	RC	late	CS	R-CS	S4	ictrace10	0.48873	0.00122664	200
SST	RC	late	CS	R-CS	S2	ictrace28	0.487895	0.00101648	200
SST	RC	late	CS	R-CS	S4	ictrace18	0.486579	0.00170561	200
SST	RC	late	CS	R-CS	S2	ictrace18	0.486533	0.00160148	200
SST	RC	late	CS	R-CS	S4	ictrace15	0.485789	0.00143945	200
SST	RC	late	CS	R-CS	S2	ictrace13	0.485454	0.00134839	200
SST	RC	late	CS	R-CS	S2	ictrace9	0.482579	0.00171773	200
SST	RC	late	CS	R-CS	S4	ictrace13	0.481974	0.00184752	200
SST	RC	late	CS	R-CS	S4	ictrace16	0.481934	0.00195233	200
SST	RC	late	CS	R-CS	S4	ictrace1	0.478401	0.00170293	200
SST	RC	late	CS	R-CS	S2	ictrace26	0.471434	0.0024706	200
SST	RC	late	US	R-CS	S2	ictrace26	0.733333	0.0218581	200
SST	RC	late	US	R-CS	S2	ictrace34	0.520833	0.0139909	200
SST	RC	late	US	R-CS	S4	ictrace8	0.520833	0.00706493	200
SST	RC	late	US	R-CS	S4	ictrace9	0.520833	0.0084111	200
SST	RC	late	US	R-CS	S4	ictrace1	0.516667	0.00781736	200
SST	RC	late	US	R-CS	S4	ictrace6	0.516667	0.00634648	200
SST	RC	late	US	R-CS	S2	ictrace22	0.5125	0.00716255	200
SST	RC	late	US	R-CS	S2	ictrace25	0.5125	0.0161132	200
SST	RC	late	US	R-CS	S4	ictrace13	0.5125	0.00551985	200
SST	RC	late	US	R-CS	S2	ictrace19	0.508333	0.0158004	200
SST	RC	late	US	R-CS	S2	ictrace21	0.508333	0.00452616	200
SST	RC	late	US	R-CS	S2	ictrace23	0.508333	0.00452616	200
SST	RC	late	US	R-CS	S2	ictrace28	0.508333	0.0136804	200
SST	RC	late	US	R-CS	S2	ictrace35	0.508333	0.0111648	200
SST	RC	late	US	R-CS	S2	ictrace4	0.508333	0.00452616	200
SST	RC	late	US	R-CS	S2	ictrace9	0.508333	0.00642802	200
SST	RC	late	US	R-CS	S3	ictrace1	0.508333	0.00642802	200
SST	RC	late	US	R-CS	S4	ictrace11	0.508333	0.0158004	200
SST	RC	late	US	R-CS	S4	ictrace2	0.508333	0.00642802	200
SST	RC	late	US	R-CS	S2	ictrace12	0.504167	0.0154757	200
SST	RC	late	US	R-CS	S2	ictrace14	0.504167	0.013304	200
SST	RC	late	US	R-CS	S2	ictrace15	0.504167	0.00321401	200
SST	RC	late	US	R-CS	S3	ictrace2	0.504167	0.00321401	200
SST	RC	late	US	R-CS	S4	ictrace16	0.504167	0.00721086	200
SST	RC	late	US	R-CS	S1	ictrace1	0.5	0	200
SST	RC	late	US	R-CS	S1	ictrace2	0.5	0	200
SST	RC	late	US	R-CS	S1	ictrace3	0.5	0	200
SST	RC	late	US	R-CS	S2	ictrace13	0.5	0	200
SST	RC	late	US	R-CS	S2	ictrace16	0.5	0	200
SST	RC	late	US	R-CS	S2	ictrace27	0.5	0.00645497	200
SST	RC	late	US	R-CS	S2	ictrace29	0.5	0.00645497	200
SST	RC	late	US	R-CS	S2	ictrace32	0.5	0.00790569	200
SST	RC	late	US	R-CS	S2	ictrace5	0.5	0.00790569	200
SST	RC	late	US	R-CS	S2	ictrace8	0.5	0.00456435	200
SST	RC	late	US	R-CS	S4	ictrace12	0.5	0.0129099	200
SST	RC	late	US	R-CS	S4	ictrace4	0.5	0	200
SST	RC	late	US	R-CS	S4	ictrace5	0.5	0	200
SST	RC	late	US	R-CS	S4	ictrace7	0.5	0.00456435	200
SST	RC	late	US	R-CS	S2	ictrace1	0.495833	0.00321401	200
SST	RC	late	US	R-CS	S2	ictrace11	0.495833	0.00321401	200
SST	RC	late	US	R-CS	S2	ictrace17	0.495833	0.00321401	200
SST	RC	late	US	R-CS	S2	ictrace30	0.495833	0.0055824	200
SST	RC	late	US	R-CS	S2	ictrace7	0.495833	0.00321401	200
SST	RC	late	US	R-CS	S4	ictrace14	0.495833	0.00321401	200
SST	RC	late	US	R-CS	S4	ictrace17	0.495833	0.0140652	200
SST	RC	late	US	R-CS	S1	ictrace6	0.491667	0.00642802	200
SST	RC	late	US	R-CS	S2	ictrace20	0.491667	0.0078837	200
SST	RC	late	US	R-CS	S2	ictrace31	0.491667	0.00452616	200
SST	RC	late	US	R-CS	S2	ictrace33	0.491667	0.00642802	200
SST	RC	late	US	R-CS	S4	ictrace18	0.491667	0.00452616	200
SST	RC	late	US	R-CS	S4	ictrace3	0.491667	0.00642802	200
SST	RC	late	US	R-CS	S2	ictrace3	0.4875	0.00551985	200
SST	RC	late	US	R-CS	S4	ictrace15	0.4875	0.0147638	200
SST	RC	late	US	R-CS	S2	ictrace2	0.479167	0.0147167	200
SST	RC	late	US	R-CS	S4	ictrace10	0.458333	0.0155345	200
SST	RC	late	US	R-CS	S2	ictrace10	0.454167	0.0164544	200
SST	RC	late	US	R-CS	S2	ictrace6	0.445833	0.0163273	200
SST	RC	late	US	R-CS	S2	ictrace18	0.433333	0.0182193	200
SST	FC	early	CS	F-CS	S2	ictrace32	0.597917	0.00646001	200
SST	FC	early	CS	F-CS	S2	ictrace3	0.576875	0.00618787	200
SST	FC	early	CS	F-CS	S2	ictrace26	0.575417	0.00570841	200
SST	FC	early	CS	F-CS	S2	ictrace9	0.575	0.00609531	200
SST	FC	early	CS	F-CS	S2	ictrace19	0.566667	0.0057735	200
SST	FC	early	CS	F-CS	S2	ictrace22	0.566667	0.0057735	200
SST	FC	early	CS	F-CS	S1	ictrace4	0.564583	0.00637888	200
SST	FC	early	CS	F-CS	S2	ictrace20	0.561667	0.00579571	200
SST	FC	early	CS	F-CS	S4	ictrace8	0.545	0.00549115	200
SST	FC	early	CS	F-CS	S2	ictrace10	0.54125	0.00512847	200
SST	FC	early	CS	F-CS	S2	ictrace13	0.536667	0.0055321	200
SST	FC	early	CS	F-CS	S2	ictrace18	0.533958	0.00492194	200
SST	FC	early	CS	F-CS	S4	ictrace3	0.525625	0.00539802	200
SST	FC	early	CS	F-CS	S4	ictrace6	0.5075	0.0082114	200
SST	FC	early	CS	F-CS	S2	ictrace8	0.505	0.00309794	200
SST	FC	early	CS	F-CS	S2	ictrace6	0.5025	0.00275819	200
SST	FC	early	CS	F-CS	S4	ictrace12	0.5025	0.00362811	200
SST	FC	early	CS	F-CS	S4	ictrace4	0.5025	0.00343137	200
SST	FC	early	CS	F-CS	S4	ictrace7	0.501875	0.00241698	200
SST	FC	early	CS	F-CS	S2	ictrace16	0.501667	0.00311582	200
SST	FC	early	CS	F-CS	S4	ictrace2	0.501667	0.0039069	200
SST	FC	early	CS	F-CS	S1	ictrace6	0.501667	0.00333125	200
SST	FC	early	CS	F-CS	S3	ictrace8	0.501042	0.0032064	200
SST	FC	early	CS	F-CS	S3	ictrace5	0.500833	0.00399609	200
SST	FC	early	CS	F-CS	S2	ictrace17	0.500208	0.00272427	200
SST	FC	early	CS	F-CS	S2	ictrace28	0.5	0	200
SST	FC	early	CS	F-CS	S2	ictrace5	0.5	0	200
SST	FC	early	CS	F-CS	S2	ictrace7	0.5	0	200
SST	FC	early	CS	F-CS	S4	ictrace15	0.5	0	200
SST	FC	early	CS	F-CS	S1	ictrace5	0.5	0.00279508	200
SST	FC	early	CS	F-CS	S3	ictrace2	0.5	0	200
SST	FC	early	CS	F-CS	S3	ictrace3	0.5	0	200
SST	FC	early	CS	F-CS	S3	ictrace4	0.5	0	200
SST	FC	early	CS	F-CS	S3	ictrace6	0.5	0	200
SST	FC	early	CS	F-CS	S3	ictrace7	0.5	0	200
SST	FC	early	CS	F-CS	S2	ictrace21	0.499375	0.00225304	200
SST	FC	early	CS	F-CS	S4	ictrace1	0.499167	0.00300405	200
SST	FC	early	CS	F-CS	S2	ictrace12	0.498333	0.00311582	200
SST	FC	early	CS	F-CS	S2	ictrace15	0.4975	0.00343137	200
SST	FC	early	CS	F-CS	S4	ictrace9	0.496667	0.00371932	200
SST	FC	early	CS	F-CS	S1	ictrace2	0.496667	0.00332499	200
SST	FC	early	CS	F-CS	S3	ictrace1	0.495833	0.00299015	200
SST	FC	early	CS	F-CS	S2	ictrace11	0.493542	0.00293295	200
SST	FC	early	CS	F-CS	S1	ictrace7	0.491667	0.00831247	200
SST	FC	early	CS	F-CS	S2	ictrace1	0.49	0.00365908	200
SST	FC	early	CS	F-CS	S2	ictrace2	0.455208	0.00499077	200
SST	FC	early	CS	F-CS	S2	ictrace33	0.455208	0.0059653	200
SST	FC	early	CS	F-CS	S4	ictrace5	0.454167	0.00576598	200
SST	FC	early	CS	F-CS	S2	ictrace14	0.453542	0.00569918	200
SST	FC	early	CS	F-CS	S2	ictrace31	0.447083	0.00558792	200
SST	FC	early	CS	F-CS	S4	ictrace11	0.441667	0.00574335	200
SST	FC	early	CS	F-CS	S2	ictrace25	0.439583	0.0111871	200
SST	FC	early	CS	F-CS	S2	ictrace4	0.417917	0.00765981	200
SST	FC	early	US	F-CS	S2	ictrace7	0.6	0.00942809	200
SST	FC	early	US	F-CS	S3	ictrace6	0.6	0.00942809	200
SST	FC	early	US	F-CS	S2	ictrace15	0.591667	0.00540062	200
SST	FC	early	US	F-CS	S2	ictrace18	0.591667	0.00540062	200
SST	FC	early	US	F-CS	S2	ictrace21	0.591667	0.00540062	200
SST	FC	early	US	F-CS	S3	ictrace7	0.591667	0.00920447	200
SST	FC	early	US	F-CS	S2	ictrace33	0.583333	0.0105409	200
SST	FC	early	US	F-CS	S2	ictrace13	0.566667	0.0057735	200
SST	FC	early	US	F-CS	S2	ictrace9	0.566667	0.0057735	200
SST	FC	early	US	F-CS	S2	ictrace1	0.558333	0.00513701	200
SST	FC	early	US	F-CS	S2	ictrace11	0.558333	0.00513701	200
SST	FC	early	US	F-CS	S2	ictrace5	0.558333	0.00513701	200
SST	FC	early	US	F-CS	S2	ictrace8	0.558333	0.00513701	200
SST	FC	early	US	F-CS	S4	ictrace12	0.558333	0.00513701	200
SST	FC	early	US	F-CS	S4	ictrace8	0.558333	0.00513701	200
SST	FC	early	US	F-CS	S3	ictrace8	0.558333	0.00513701	200
SST	FC	early	US	F-CS	S4	ictrace2	0.508333	0.00348608	200
SST	FC	early	US	F-CS	S2	ictrace32	0.504167	0.00380743	200
SST	FC	early	US	F-CS	S4	ictrace6	0.504167	0.00321401	200
SST	FC	early	US	F-CS	S1	ictrace6	0.504167	0.00380743	200
SST	FC	early	US	F-CS	S2	ictrace16	0.503333	0.00352767	200
SST	FC	early	US	F-CS	S2	ictrace20	0.501875	0.00241698	200
SST	FC	early	US	F-CS	S1	ictrace5	0.501875	0.00286104	200
SST	FC	early	US	F-CS	S1	ictrace7	0.501667	0.00408078	200
SST	FC	early	US	F-CS	S2	ictrace3	0.500833	0.00363194	200
SST	FC	early	US	F-CS	S4	ictrace1	0.500625	0.00225304	200
SST	FC	early	US	F-CS	S4	ictrace15	0.500625	0.00286377	200
SST	FC	early	US	F-CS	S1	ictrace4	0.500625	0.00299707	200
SST	FC	early	US	F-CS	S2	ictrace10	0.5	0.00216506	200
SST	FC	early	US	F-CS	S2	ictrace12	0.5	0.00390868	200
SST	FC	early	US	F-CS	S2	ictrace14	0.5	0	200
SST	FC	early	US	F-CS	S2	ictrace31	0.5	0	200
SST	FC	early	US	F-CS	S2	ictrace6	0.5	0	200
SST	FC	early	US	F-CS	S4	ictrace7	0.5	0	200
SST	FC	early	US	F-CS	S1	ictrace2	0.5	0	200
SST	FC	early	US	F-CS	S3	ictrace2	0.5	0	200
SST	FC	early	US	F-CS	S3	ictrace3	0.5	0	200
SST	FC	early	US	F-CS	S2	ictrace28	0.499167	0.00322695	200
SST	FC	early	US	F-CS	S4	ictrace4	0.499167	0.00363194	200
SST	FC	early	US	F-CS	S2	ictrace17	0.49875	0.00279369	200
SST	FC	early	US	F-CS	S3	ictrace1	0.498333	0.00372492	200
SST	FC	early	US	F-CS	S3	ictrace4	0.498333	0.00353357	200
SST	FC	early	US	F-CS	S2	ictrace4	0.498125	0.00257353	200
SST	FC	early	US	F-CS	S4	ictrace5	0.495	0.00936601	200
SST	FC	early	US	F-CS	S2	ictrace25	0.479167	0.00603088	200
SST	FC	early	US	F-CS	S2	ictrace19	0.474167	0.00581515	200
SST	FC	early	US	F-CS	S2	ictrace22	0.471667	0.00678131	200
SST	FC	early	US	F-CS	S2	ictrace26	0.453333	0.00636396	200
SST	FC	early	US	F-CS	S4	ictrace11	0.441667	0.00513701	200
SST	FC	early	US	F-CS	S4	ictrace3	0.441667	0.00513701	200
SST	FC	early	US	F-CS	S4	ictrace9	0.441667	0.00513701	200
SST	FC	early	US	F-CS	S2	ictrace2	0.433333	0.0057735	200
SST	FC	early	US	F-CS	S3	ictrace5	0.4	0.00942809	200
SST	FC	late	CS	F-CS	S2	ictrace32	0.591667	0.00540062	200
SST	FC	late	CS	F-CS	S4	ictrace3	0.566667	0.0057735	200
SST	FC	late	CS	F-CS	S2	ictrace22	0.558333	0.00513701	200
SST	FC	late	CS	F-CS	S2	ictrace6	0.512292	0.00636558	200
SST	FC	late	CS	F-CS	S2	ictrace4	0.505833	0.00246574	200
SST	FC	late	CS	F-CS	S2	ictrace31	0.5025	0.00381472	200
SST	FC	late	CS	F-CS	S2	ictrace2	0.501667	0.00353357	200
SST	FC	late	CS	F-CS	S2	ictrace15	0.50125	0.00176556	200
SST	FC	late	CS	F-CS	S2	ictrace1	0.5	0	200
SST	FC	late	CS	F-CS	S2	ictrace12	0.5	0.00353553	200
SST	FC	late	CS	F-CS	S2	ictrace18	0.5	0	200
SST	FC	late	CS	F-CS	S2	ictrace23	0.5	0.00153093	200
SST	FC	late	CS	F-CS	S2	ictrace29	0.5	0	200
SST	FC	late	CS	F-CS	S2	ictrace3	0.5	0	200
SST	FC	late	CS	F-CS	S2	ictrace35	0.5	0.00197642	200
SST	FC	late	CS	F-CS	S4	ictrace10	0.5	0	200
SST	FC	late	CS	F-CS	S4	ictrace15	0.5	0	200
SST	FC	late	CS	F-CS	S2	ictrace14	0.49875	0.00216326	200
SST	FC	late	CS	F-CS	S4	ictrace9	0.49875	0.00293018	200
SST	FC	late	CS	F-CS	S4	ictrace2	0.498333	0.00353357	200
SST	FC	late	CS	F-CS	S2	ictrace21	0.4975	0.00299942	200
SST	FC	late	CS	F-CS	S2	ictrace7	0.4975	0.00362811	200
SST	FC	late	CS	F-CS	S4	ictrace8	0.495833	0.00321401	200
SST	FC	late	CS	F-CS	S4	ictrace4	0.495625	0.00666274	200
SST	FC	late	CS	F-CS	S2	ictrace10	0.494167	0.00379647	200
SST	FC	late	CS	F-CS	S2	ictrace5	0.493958	0.00529017	200
SST	FC	late	CS	F-CS	S2	ictrace20	0.4925	0.00491914	200
SST	FC	late	CS	F-CS	S2	ictrace8	0.488333	0.00296332	200
SST	FC	late	CS	F-CS	S4	ictrace6	0.481667	0.00604985	200
SST	FC	late	CS	F-CS	S2	ictrace11	0.479167	0.00427972	200
SST	FC	late	CS	F-CS	S2	ictrace9	0.472292	0.00457649	200
SST	FC	late	CS	F-CS	S4	ictrace11	0.452917	0.00534658	200
SST	FC	late	CS	F-CS	S4	ictrace1	0.450417	0.00495982	200
SST	FC	late	CS	F-CS	S4	ictrace5	0.449583	0.00506546	200
SST	FC	late	CS	F-CS	S2	ictrace13	0.445833	0.00564426	200
SST	FC	late	US	F-CS	S2	ictrace31	0.625	0.00456435	200
SST	FC	late	US	F-CS	S2	ictrace29	0.616667	0.00707107	200
SST	FC	late	US	F-CS	S2	ictrace1	0.591667	0.00540062	200
SST	FC	late	US	F-CS	S2	ictrace12	0.591667	0.00540062	200
SST	FC	late	US	F-CS	S4	ictrace11	0.583333	0.0105409	200
SST	FC	late	US	F-CS	S2	ictrace35	0.566667	0.0057735	200
SST	FC	late	US	F-CS	S4	ictrace15	0.566667	0.0057735	200
SST	FC	late	US	F-CS	S4	ictrace3	0.566667	0.0057735	200
SST	FC	late	US	F-CS	S2	ictrace11	0.558333	0.00513701	200
SST	FC	late	US	F-CS	S2	ictrace5	0.558333	0.00513701	200
SST	FC	late	US	F-CS	S2	ictrace8	0.558333	0.00513701	200
SST	FC	late	US	F-CS	S4	ictrace10	0.558333	0.00513701	200
SST	FC	late	US	F-CS	S2	ictrace22	0.505833	0.00341107	200
SST	FC	late	US	F-CS	S2	ictrace13	0.5025	0.00948152	200
SST	FC	late	US	F-CS	S2	ictrace15	0.501667	0.00333125	200
SST	FC	late	US	F-CS	S2	ictrace14	0.50125	0.00265018	200
SST	FC	late	US	F-CS	S2	ictrace10	0.5	0	200
SST	FC	late	US	F-CS	S2	ictrace23	0.5	0.00233854	200
SST	FC	late	US	F-CS	S4	ictrace8	0.5	0	200
SST	FC	late	US	F-CS	S4	ictrace9	0.5	0.00263523	200
SST	FC	late	US	F-CS	S4	ictrace2	0.499375	0.00272395	200
SST	FC	late	US	F-CS	S2	ictrace3	0.49875	0.00265018	200
SST	FC	late	US	F-CS	S2	ictrace18	0.498333	0.00353357	200
SST	FC	late	US	F-CS	S2	ictrace21	0.4975	0.00233184	200
SST	FC	late	US	F-CS	S2	ictrace4	0.495	0.00351781	200
SST	FC	late	US	F-CS	S2	ictrace7	0.495	0.00309794	200
SST	FC	late	US	F-CS	S4	ictrace1	0.475	0.00565194	200
SST	FC	late	US	F-CS	S2	ictrace20	0.474167	0.00616301	200
SST	FC	late	US	F-CS	S2	ictrace32	0.470208	0.00641029	200
SST	FC	late	US	F-CS	S2	ictrace2	0.460833	0.00655929	200
SST	FC	late	US	F-CS	S4	ictrace4	0.441667	0.00513701	200
SST	FC	late	US	F-CS	S4	ictrace5	0.441667	0.00513701	200
SST	FC	late	US	F-CS	S2	ictrace6	0.44125	0.0104549	200
SST	FC	late	US	F-CS	S2	ictrace9	0.433333	0.0057735	200
SST	FC	late	US	F-CS	S4	ictrace6	0.375	0.00456435	200
SST	recall	PBS	CS	F-CS	S4	ictrace2	0.566429	0.00430416	200
SST	recall	PBS	CS	F-CS	S3	ictrace7	0.564286	0.00437733	200
SST	recall	PBS	CS	F-CS	S3	ictrace4	0.561905	0.0043383	200
SST	recall	PBS	CS	F-CS	S2	ictrace22t2	0.54869	0.00295251	200
SST	recall	PBS	CS	F-CS	S2	ictrace21	0.548333	0.00273245	200
SST	recall	PBS	CS	F-CS	S3	ictrace5	0.547619	0.00276642	200
SST	recall	PBS	CS	F-CS	S4	ictrace15t2	0.547619	0.00276642	200
SST	recall	PBS	CS	F-CS	S3	ictrace3t2	0.547619	0.00276642	200
SST	recall	PBS	CS	F-CS	S4	ictrace11t2	0.547024	0.00301022	200
SST	recall	PBS	CS	F-CS	S2	ictrace19t2	0.545774	0.00466956	200
SST	recall	PBS	CS	F-CS	S4	ictrace2t2	0.541964	0.00337866	200
SST	recall	PBS	CS	F-CS	S2	ictrace15	0.537321	0.0027273	200
SST	recall	PBS	CS	F-CS	S4	ictrace9t2	0.536786	0.00424183	200
SST	recall	PBS	CS	F-CS	S2	ictrace23t2	0.536488	0.00280846	200
SST	recall	PBS	CS	F-CS	S2	ictrace16t2	0.535774	0.00280899	200
SST	recall	PBS	CS	F-CS	S4	ictrace19t2	0.535595	0.00388685	200
SST	recall	PBS	CS	F-CS	S4	ictrace3t2	0.535119	0.00415794	200
SST	recall	PBS	CS	F-CS	S4	ictrace13t2	0.533869	0.00274339	200
SST	recall	PBS	CS	F-CS	S4	ictrace8	0.530952	0.00269374	200
SST	recall	PBS	CS	F-CS	S2	ictrace17t2	0.530952	0.00269374	200
SST	recall	PBS	CS	F-CS	S2	ictrace20t2	0.530952	0.00269374	200
SST	recall	PBS	CS	F-CS	S2	ictrace21t2	0.530952	0.00269374	200
SST	recall	PBS	CS	F-CS	S2	ictrace16	0.52375	0.00278747	200
SST	recall	PBS	CS	F-CS	S2	ictrace17	0.52125	0.0027637	200
SST	recall	PBS	CS	F-CS	S4	ictrace14t2	0.520119	0.00454443	200
SST	recall	PBS	CS	F-CS	S2	ictrace22	0.518512	0.00246388	200
SST	recall	PBS	CS	F-CS	S2	ictrace9	0.51744	0.0025821	200
SST	recall	PBS	CS	F-CS	S4	ictrace5	0.517321	0.00259976	200
SST	recall	PBS	CS	F-CS	S2	ictrace10	0.516667	0.00244265	200
SST	recall	PBS	CS	F-CS	S2	ictrace12t2	0.51631	0.0025991	200
SST	recall	PBS	CS	F-CS	S4	ictrace6	0.513393	0.0025323	200
SST	recall	PBS	CS	F-CS	S2	ictrace5	0.509821	0.00356292	200
SST	recall	PBS	CS	F-CS	S2	ictrace28	0.509524	0.00319882	200
SST	recall	PBS	CS	F-CS	S4	ictrace1t2	0.50756	0.00378356	200
SST	recall	PBS	CS	F-CS	S2	ictrace13	0.50381	0.00324474	200
SST	recall	PBS	CS	F-CS	S3	ictrace3	0.503214	0.00145489	200
SST	recall	PBS	CS	F-CS	S3	ictrace1	0.502917	0.00170554	200
SST	recall	PBS	CS	F-CS	S2	ictrace24t2	0.502917	0.00180446	200
SST	recall	PBS	CS	F-CS	S2	ictrace13t2	0.5025	0.00175891	200
SST	recall	PBS	CS	F-CS	S2	ictrace3	0.502083	0.00149507	200
SST	recall	PBS	CS	F-CS	S4	ictrace8t2	0.501667	0.00166249	200
SST	recall	PBS	CS	F-CS	S2	ictrace5t2	0.50125	0.00171569	200
SST	recall	PBS	CS	F-CS	S4	ictrace24t2	0.50125	0.00161132	200
SST	recall	PBS	CS	F-CS	S2	ictrace4t2	0.500833	0.0013163	200
SST	recall	PBS	CS	F-CS	S2	ictrace18	0.500357	0.00155654	200
SST	recall	PBS	CS	F-CS	S2	ictrace12	0.500298	0.00379502	200
SST	recall	PBS	CS	F-CS	S2	ictrace2	0.5	0.00176777	200
SST	recall	PBS	CS	F-CS	S2	ictrace8	0.5	0	200
SST	recall	PBS	CS	F-CS	S2	ictrace2t2	0.5	0	200
SST	recall	PBS	CS	F-CS	S2	ictrace6t2	0.5	0	200
SST	recall	PBS	CS	F-CS	S4	ictrace6t2	0.5	0	200
SST	recall	PBS	CS	F-CS	S4	ictrace7t2	0.5	0	200
SST	recall	PBS	CS	F-CS	S4	ictrace5t2	0.499643	0.00128745	200
SST	recall	PBS	CS	F-CS	S2	ictrace6	0.499583	0.00150202	200
SST	recall	PBS	CS	F-CS	S4	ictrace7	0.499583	0.000931229	200
SST	recall	PBS	CS	F-CS	S4	ictrace18t2	0.499583	0.00161347	200
SST	recall	PBS	CS	F-CS	S2	ictrace14t2	0.499167	0.00186246	200
SST	recall	PBS	CS	F-CS	S1	ictrace2	0.49875	0.00149971	200
SST	recall	PBS	CS	F-CS	S4	ictrace16t2	0.498631	0.0031454	200
SST	recall	PBS	CS	F-CS	S4	ictrace12t2	0.498333	0.00431376	200
SST	recall	PBS	CS	F-CS	S2	ictrace25	0.497917	0.00181022	200
SST	recall	PBS	CS	F-CS	S2	ictrace10t2	0.497738	0.00170739	200
SST	recall	PBS	CS	F-CS	S4	ictrace9	0.496607	0.00191289	200
SST	recall	PBS	CS	F-CS	S2	ictrace11	0.496488	0.00303723	200
SST	recall	PBS	CS	F-CS	S2	ictrace7t2	0.493155	0.00218127	200
SST	recall	PBS	CS	F-CS	S2	ictrace7	0.492024	0.00217259	200
SST	recall	PBS	CS	F-CS	S2	ictrace20	0.490833	0.00255427	200
SST	recall	PBS	CS	F-CS	S2	ictrace19	0.487738	0.00454484	200
SST	recall	PBS	CS	F-CS	S2	ictrace26	0.48625	0.00308388	200
SST	recall	PBS	CS	F-CS	S4	ictrace23t2	0.48619	0.00215183	200
SST	recall	PBS	CS	F-CS	S4	ictrace17t2	0.481905	0.00266592	200
SST	recall	PBS	CS	F-CS	S2	ictrace26t2	0.480238	0.00302278	200
SST	recall	PBS	CS	F-CS	S2	ictrace9t2	0.479286	0.00245313	200
SST	recall	PBS	CS	F-CS	S4	ictrace22t2	0.479226	0.0028222	200
SST	recall	PBS	CS	F-CS	S2	ictrace27t2	0.47756	0.00433436	200
SST	recall	PBS	CS	F-CS	S2	ictrace8t2	0.476429	0.00314403	200
SST	recall	PBS	CS	F-CS	S2	ictrace14	0.47625	0.00290937	200
SST	recall	PBS	CS	F-CS	S4	ictrace21t2	0.476071	0.00258499	200
SST	recall	PBS	CS	F-CS	S2	ictrace15t2	0.476012	0.00297914	200
SST	recall	PBS	CS	F-CS	S2	ictrace28t2	0.475714	0.00254751	200
SST	recall	PBS	CS	F-CS	S4	ictrace4t2	0.475595	0.00268814	200
SST	recall	PBS	CS	F-CS	S2	ictrace3t2	0.475298	0.00255736	200
SST	recall	PBS	CS	F-CS	S4	ictrace20t2	0.475179	0.00270133	200
SST	recall	PBS	CS	F-CS	S4	ictrace3	0.474167	0.00278824	200
SST	recall	PBS	CS	F-CS	S2	ictrace24	0.47381	0.00280836	200
SST	recall	PBS	CS	F-CS	S4	ictrace10t2	0.465774	0.00360199	200
SST	recall	PBS	CS	F-CS	S4	ictrace15	0.465714	0.00423963	200
SST	recall	PBS	CS	F-CS	S4	ictrace1	0.458333	0.00417601	200
SST	recall	PBS	CS	F-CS	S4	ictrace10	0.438631	0.0064846	200
SST	recall	PBS	CS	R-CS	S4	ictrace9	0.611905	0.00615374	200
SST	recall	PBS	CS	R-CS	S3	ictrace5	0.575	0.00381974	200
SST	recall	PBS	CS	R-CS	S4	ictrace15t2	0.569	0.00794953	200
SST	recall	PBS	CS	R-CS	S4	ictrace18t2	0.565	0.00380789	200
SST	recall	PBS	CS	R-CS	S2	ictrace2t2	0.56	0.0034641	200
SST	recall	PBS	CS	R-CS	S4	ictrace10	0.556071	0.00493911	200
SST	recall	PBS	CS	R-CS	S2	ictrace20t2	0.550875	0.00386239	200
SST	recall	PBS	CS	R-CS	S3	ictrace3	0.550179	0.0097295	200
SST	recall	PBS	CS	R-CS	S2	ictrace18	0.55	0.00288675	200
SST	recall	PBS	CS	R-CS	S2	ictrace24	0.549821	0.00410505	200
SST	recall	PBS	CS	R-CS	S2	ictrace10	0.545238	0.00413765	200
SST	recall	PBS	CS	R-CS	S2	ictrace12	0.545238	0.00262985	200
SST	recall	PBS	CS	R-CS	S4	ictrace9t2	0.545	0.003937	200
SST	recall	PBS	CS	R-CS	S1	ictrace10	0.533452	0.00273731	200
SST	recall	PBS	CS	R-CS	S3	ictrace1	0.533214	0.00454225	200
SST	recall	PBS	CS	R-CS	S2	ictrace5	0.530952	0.00269374	200
SST	recall	PBS	CS	R-CS	S4	ictrace23t2	0.5285	0.00319198	200
SST	recall	PBS	CS	R-CS	S2	ictrace15	0.528036	0.00277524	200
SST	recall	PBS	CS	R-CS	S2	ictrace4t2	0.526375	0.00388988	200
SST	recall	PBS	CS	R-CS	S2	ictrace9t2	0.524	0.00325883	200
SST	recall	PBS	CS	R-CS	S2	ictrace3t2	0.524	0.00318119	200
SST	recall	PBS	CS	R-CS	S2	ictrace21	0.518929	0.00260166	200
SST	recall	PBS	CS	R-CS	S4	ictrace7t2	0.5125	0.00380378	200
SST	recall	PBS	CS	R-CS	S2	ictrace4	0.506429	0.00324155	200
SST	recall	PBS	CS	R-CS	S2	ictrace1	0.506071	0.00326459	200
SST	recall	PBS	CS	R-CS	S4	ictrace6t2	0.50475	0.00228028	200
SST	recall	PBS	CS	R-CS	S4	ictrace20t2	0.503125	0.00256745	200
SST	recall	PBS	CS	R-CS	S2	ictrace6	0.502857	0.00141421	200
SST	recall	PBS	CS	R-CS	S2	ictrace7t2	0.501875	0.00206865	200
SST	recall	PBS	CS	R-CS	S2	ictrace12t2	0.5015	0.00193358	200
SST	recall	PBS	CS	R-CS	S4	ictrace16t2	0.5015	0.00217687	200
SST	recall	PBS	CS	R-CS	S2	ictrace15t2	0.501	0.00141244	200
SST	recall	PBS	CS	R-CS	S4	ictrace8	0.500893	0.001925	200
SST	recall	PBS	CS	R-CS	S4	ictrace1	0.500833	0.00212377	200
SST	recall	PBS	CS	R-CS	S2	ictrace13	0.500714	0.00159639	200
SST	recall	PBS	CS	R-CS	S1	ictrace4t2	0.5005	0.00239766	200
SST	recall	PBS	CS	R-CS	S2	ictrace16	0.500357	0.00155654	200
SST	recall	PBS	CS	R-CS	S4	ictrace3	0.500357	0.00128745	200
SST	recall	PBS	CS	R-CS	S1	ictrace3	0.500357	0.00163644	200
SST	recall	PBS	CS	R-CS	S2	ictrace10t2	0.50025	0.00740985	200
SST	recall	PBS	CS	R-CS	S2	ictrace9	0.5	0	200
SST	recall	PBS	CS	R-CS	S4	ictrace15	0.5	0.00174964	200
SST	recall	PBS	CS	R-CS	S4	ictrace4	0.5	0	200
SST	recall	PBS	CS	R-CS	S1	ictrace2	0.5	0	200
SST	recall	PBS	CS	R-CS	S3	ictrace7	0.5	0	200
SST	recall	PBS	CS	R-CS	S2	ictrace23t2	0.5	0.000707107	200
SST	recall	PBS	CS	R-CS	S2	ictrace26t2	0.5	0	200
SST	recall	PBS	CS	R-CS	S4	ictrace19t2	0.5	0.00223607	200
SST	recall	PBS	CS	R-CS	S4	ictrace2t2	0.5	0.0025	200
SST	recall	PBS	CS	R-CS	S4	ictrace8t2	0.5	0.00187083	200
SST	recall	PBS	CS	R-CS	S3	ictrace2t2	0.5	0	200
SST	recall	PBS	CS	R-CS	S2	ictrace16t2	0.4995	0.000865303	200
SST	recall	PBS	CS	R-CS	S4	ictrace5t2	0.4995	0.00165794	200
SST	recall	PBS	CS	R-CS	S1	ictrace4t2	0.499167	0.00176678	200
SST	recall	PBS	CS	R-CS	S4	ictrace14t2	0.499	0.00223495	200
SST	recall	PBS	CS	R-CS	S4	ictrace21t2	0.499	0.00186949	200
SST	recall	PBS	CS	R-CS	S4	ictrace4t2	0.499	0.00458203	200
SST	recall	PBS	CS	R-CS	S4	ictrace17t2	0.4985	0.00173781	200
SST	recall	PBS	CS	R-CS	S3	ictrace3t2	0.498	0.00232755	200
SST	recall	PBS	CS	R-CS	S2	ictrace8	0.49756	0.00158673	200
SST	recall	PBS	CS	R-CS	S2	ictrace25	0.497143	0.00158436	200
SST	recall	PBS	CS	R-CS	S2	ictrace2	0.496786	0.00162078	200
SST	recall	PBS	CS	R-CS	S2	ictrace28t2	0.496	0.00243311	200
SST	recall	PBS	CS	R-CS	S4	ictrace5	0.495417	0.0018817	200
SST	recall	PBS	CS	R-CS	S4	ictrace7	0.492619	0.0019058	200
SST	recall	PBS	CS	R-CS	S2	ictrace27t2	0.49	0.0043946	200
SST	recall	PBS	CS	R-CS	S2	ictrace21t2	0.487875	0.00468034	200
SST	recall	PBS	CS	R-CS	S2	ictrace8t2	0.48725	0.0031074	200
SST	recall	PBS	CS	R-CS	S2	ictrace11t2	0.480375	0.00332546	200
SST	recall	PBS	CS	R-CS	S4	ictrace2	0.479048	0.002599	200
SST	recall	PBS	CS	R-CS	S2	ictrace20	0.478452	0.00253852	200
SST	recall	PBS	CS	R-CS	S4	ictrace6	0.476607	0.0026837	200
SST	recall	PBS	CS	R-CS	S2	ictrace28	0.476369	0.00267986	200
SST	recall	PBS	CS	R-CS	S2	ictrace14	0.475179	0.00263628	200
SST	recall	PBS	CS	R-CS	S2	ictrace22t2	0.4745	0.00380772	200
SST	recall	PBS	CS	R-CS	S4	ictrace12t2	0.474	0.00375766	200
SST	recall	PBS	CS	R-CS	S3	ictrace4	0.47375	0.00279102	200
SST	recall	PBS	CS	R-CS	S2	ictrace17t2	0.473	0.00410548	200
SST	recall	PBS	CS	R-CS	S2	ictrace19	0.472083	0.00278123	200
SST	recall	PBS	CS	R-CS	S2	ictrace7	0.471786	0.00270858	200
SST	recall	PBS	CS	R-CS	S2	ictrace22	0.470119	0.00362264	200
SST	recall	PBS	CS	R-CS	S2	ictrace5t2	0.469125	0.00365281	200
SST	recall	PBS	CS	R-CS	S2	ictrace14t2	0.469	0.0034198	200
SST	recall	PBS	CS	R-CS	S2	ictrace24t2	0.469	0.00349213	200
SST	recall	PBS	CS	R-CS	S4	ictrace1t2	0.46725	0.00402488	200
SST	recall	PBS	CS	R-CS	S1	ictrace3t2	0.466	0.00342345	200
SST	recall	PBS	CS	R-CS	S4	ictrace13t2	0.4655	0.00384691	200
SST	recall	PBS	CS	R-CS	S4	ictrace3t2	0.4645	0.00393843	200
SST	recall	PBS	CS	R-CS	S4	ictrace25t2	0.464	0.00384724	200
SST	recall	PBS	CS	R-CS	S2	ictrace6t2	0.46225	0.00392504	200
SST	recall	PBS	CS	R-CS	S4	ictrace10t2	0.46125	0.00387601	200
SST	recall	PBS	CS	R-CS	S2	ictrace1t2	0.4605	0.00463128	200
SST	recall	PBS	CS	R-CS	S2	ictrace13t2	0.4595	0.00391934	200
SST	recall	PBS	CS	R-CS	S2	ictrace19t2	0.45075	0.00483125	200
SST	recall	PBS	CS	R-CS	S4	ictrace11t2	0.4275	0.00565409	200
SST	recall	PBS	CS discrimination	-	S3	ictrace22	0.718327	0.0128179	200
SST	recall	PBS	CS discrimination	-	S4	ictrace5	0.705866	0.0119671	200
SST	recall	PBS	CS discrimination	-	S3	ictrace15	0.660656	0.0207413	200
SST	recall	PBS	CS discrimination	-	S4	ictrace3	0.646347	0.00942016	200
SST	recall	PBS	CS discrimination	-	S4	ictrace6	0.635966	0.014736	200
SST	recall	PBS	CS discrimination	-	S3	ictrace14	0.633434	0.00888786	200
SST	recall	PBS	CS discrimination	-	S4	ictrace1	0.629786	0.0139323	200
SST	recall	PBS	CS discrimination	-	S3	ictrace7	0.624625	0.0143549	200
SST	recall	PBS	CS discrimination	-	S4	ictrace7	0.613718	0.0128068	200
SST	recall	PBS	CS discrimination	-	S4	ictrace4	0.608973	0.00520945	200
SST	recall	PBS	CS discrimination	-	S3	ictrace6	0.60847	0.00707718	200
SST	recall	PBS	CS discrimination	-	S2	ictrace7	0.605995	0.00534051	200
SST	recall	PBS	CS discrimination	-	S3	ictrace20	0.6025	0.01219	200
SST	recall	PBS	CS discrimination	-	S1	ictrace2	0.602113	0.00495487	200
SST	recall	PBS	CS discrimination	-	S1	ictrace10	0.601359	0.00633912	200
SST	recall	PBS	CS discrimination	-	S1	ictrace4t2	0.600119	0.0048342	200
SST	recall	PBS	CS discrimination	-	S3	ictrace4	0.599998	0.00483448	200
SST	recall	PBS	CS discrimination	-	S1	ictrace3	0.598041	0.00480135	200
SST	recall	PBS	CS discrimination	-	S3	ictrace16	0.596065	0.0196741	200
SST	recall	PBS	CS discrimination	-	S3	ictrace24	0.595717	0.0054157	200
SST	recall	PBS	CS discrimination	-	S3	ictrace25	0.595637	0.00880445	200
SST	recall	PBS	CS discrimination	-	S3	ictrace3	0.594907	0.0117181	200
SST	recall	PBS	CS discrimination	-	S2	ictrace4	0.592075	0.00523297	200
SST	recall	PBS	CS discrimination	-	S3	ictrace11	0.591589	0.00619001	200
SST	recall	PBS	CS discrimination	-	S3	ictrace18	0.591469	0.00461914	200
SST	recall	PBS	CS discrimination	-	S3	ictrace2	0.59049	0.00484941	200
SST	recall	PBS	CS discrimination	-	S4	ictrace2	0.588766	0.00533912	200
SST	recall	PBS	CS discrimination	-	S3	ictrace8	0.574345	0.0102465	200
SST	recall	PBS	CS discrimination	-	S3	ictrace10	0.570779	0.0100548	200
SST	recall	PBS	CS discrimination	-	S4	ictrace9	0.570253	0.00762797	200
SST	recall	PBS	CS discrimination	-	S4	ictrace10	0.569402	0.0189047	200
SST	recall	PBS	CS discrimination	-	S4	ictrace8	0.563595	0.0107571	200
SST	recall	PBS	CS discrimination	-	S3	ictrace12	0.544706	0.0109662	200
SST	recall	PBS	CS discrimination	-	S3	ictrace28	0.540962	0.0186072	200
SST	recall	PBS	CS discrimination	-	S4	ictrace15	0.530651	0.0126108	200
SST	recall	PBS	CS discrimination	-	S3	ictrace26	0.498907	0.0149288	200
SST	recall	PBS	CS discrimination	-	S3	ictrace5	0.493029	0.0145461	200
SST	recall	PBS	CS discrimination	-	S3	ictrace21	0.487296	0.0238454	200
SST	recall	PBS	CS discrimination	-	S3	ictrace13	0.486383	0.0197687	200
SST	recall	PBS	CS discrimination	-	S3	ictrace9	0.470963	0.017091	200
SST	recall	PBS	CS discrimination	-	S3	ictrace17	0.469148	0.0167603	200
SST	recall	PBS	CS discrimination	-	S3	ictrace1	0.46146	0.0178101	200
SST	recall	PBS	CS discrimination	-	S3	ictrace19	0.432087	0.0183161	200
SST	recall	PBS	CS discrimination	-	S2	ictrace1	0.3822	0.0181159	200
SST	recall	PBS	CS discrimination	-	S2	ictrace5	0.352496	0.0154168	200
SST	recall	PBS	CS discrimination	-	S2	ictrace3	0.326954	0.0138361	200
SST	recall	aIC inhibition	CS	F-CS	S2	ictrace12	0.54744	0.00270225	200
SST	recall	aIC inhibition	CS	F-CS	S2	ictrace8	0.533333	0.00288675	200
SST	recall	aIC inhibition	CS	F-CS	S2	ictrace4	0.531726	0.00318581	200
SST	recall	aIC inhibition	CS	F-CS	S2	ictrace14t2	0.525	0.00353553	200
SST	recall	aIC inhibition	CS	F-CS	S2	ictrace17	0.518452	0.00247543	200
SST	recall	aIC inhibition	CS	F-CS	S2	ictrace19t2	0.511375	0.00287118	200
SST	recall	aIC inhibition	CS	F-CS	S2	ictrace25t2	0.50975	0.00552209	200
SST	recall	aIC inhibition	CS	F-CS	S2	ictrace14	0.508333	0.00228218	200
SST	recall	aIC inhibition	CS	F-CS	S2	ictrace2	0.503929	0.00263403	200
SST	recall	aIC inhibition	CS	F-CS	S2	ictrace8t2	0.502	0.00186548	200
SST	recall	aIC inhibition	CS	F-CS	S2	ictrace29t2	0.5015	0.00193358	200
SST	recall	aIC inhibition	CS	F-CS	S2	ictrace4t2	0.5015	0.00421174	200
SST	recall	aIC inhibition	CS	F-CS	S1	ictrace1t2	0.5015	0.00239557	200
SST	recall	aIC inhibition	CS	F-CS	S2	ictrace21t2	0.50125	0.00233686	200
SST	recall	aIC inhibition	CS	F-CS	S1	ictrace3t2	0.501	0.00234414	200
SST	recall	aIC inhibition	CS	F-CS	S2	ictrace9t2	0.501	0.00244847	200
SST	recall	aIC inhibition	CS	F-CS	S2	ictrace11t2	0.5005	0.00217916	200
SST	recall	aIC inhibition	CS	F-CS	S1	ictrace3	0.5	0	200
SST	recall	aIC inhibition	CS	F-CS	S2	ictrace10t2	0.5	0	200
SST	recall	aIC inhibition	CS	F-CS	S2	ictrace27t2	0.5	0	200
SST	recall	aIC inhibition	CS	F-CS	S2	ictrace3t2	0.5	0.001	200
SST	recall	aIC inhibition	CS	F-CS	S2	ictrace5t2	0.5	0	200
SST	recall	aIC inhibition	CS	F-CS	S2	ictrace13t2	0.499875	0.00146306	200
SST	recall	aIC inhibition	CS	F-CS	S2	ictrace1t2	0.4995	0.00206125	200
SST	recall	aIC inhibition	CS	F-CS	S2	ictrace16t2	0.4995	0.000865303	200
SST	recall	aIC inhibition	CS	F-CS	S2	ictrace17t2	0.4995	0.00217916	200
SST	recall	aIC inhibition	CS	F-CS	S1	ictrace7t2	0.4995	0.00206125	200
SST	recall	aIC inhibition	CS	F-CS	S2	ictrace15	0.499286	0.00167439	200
SST	recall	aIC inhibition	CS	F-CS	S2	ictrace6	0.499167	0.00176678	200
SST	recall	aIC inhibition	CS	F-CS	S2	ictrace6t2	0.4985	0.00217687	200
SST	recall	aIC inhibition	CS	F-CS	S2	ictrace22t2	0.498	0.00140712	200
SST	recall	aIC inhibition	CS	F-CS	S2	ictrace23t2	0.498	0.00172627	200
SST	recall	aIC inhibition	CS	F-CS	S1	ictrace8	0.4975	0.00356606	200
SST	recall	aIC inhibition	CS	F-CS	S2	ictrace3	0.497321	0.00333167	200
SST	recall	aIC inhibition	CS	F-CS	S2	ictrace7	0.496786	0.0018418	200
SST	recall	aIC inhibition	CS	F-CS	S2	ictrace13	0.4875	0.00261871	200
SST	recall	aIC inhibition	CS	F-CS	S2	ictrace18	0.48625	0.00250155	200
SST	recall	aIC inhibition	CS	F-CS	S2	ictrace5	0.481786	0.00303619	200
SST	recall	aIC inhibition	CS	F-CS	S2	ictrace16	0.480357	0.00288767	200
SST	recall	aIC inhibition	CS	F-CS	S2	ictrace26t2	0.47775	0.00393617	200
SST	recall	aIC inhibition	CS	F-CS	S2	ictrace11	0.477202	0.00263762	200
SST	recall	aIC inhibition	CS	F-CS	S2	ictrace20t2	0.476875	0.00332104	200
SST	recall	aIC inhibition	CS	F-CS	S2	ictrace10	0.476429	0.00272507	200
SST	recall	aIC inhibition	CS	F-CS	S1	ictrace5t2	0.476	0.00348138	200
SST	recall	aIC inhibition	CS	F-CS	S2	ictrace1	0.475238	0.00275918	200
SST	recall	aIC inhibition	CS	F-CS	S2	ictrace18t2	0.4705	0.00344946	200
SST	recall	aIC inhibition	CS	F-CS	S2	ictrace15t2	0.46825	0.00421941	200
SST	recall	aIC inhibition	CS	F-CS	S2	ictrace12t2	0.468	0.00447269	200
SST	recall	aIC inhibition	CS	F-CS	S2	ictrace7t2	0.468	0.00392572	200
SST	recall	aIC inhibition	CS	F-CS	S2	ictrace9	0.459821	0.00316366	200
SST	recall	aIC inhibition	CS	R-CS	S2	ictrace12	0.547619	0.00464133	200
SST	recall	aIC inhibition	CS	R-CS	S2	ictrace12t2	0.545	0.003937	200
SST	recall	aIC inhibition	CS	R-CS	S2	ictrace1t2	0.54	0.0034641	200
SST	recall	aIC inhibition	CS	R-CS	S2	ictrace15t2	0.54	0.0034641	200
SST	recall	aIC inhibition	CS	R-CS	S2	ictrace18t2	0.54	0.0034641	200
SST	recall	aIC inhibition	CS	R-CS	S2	ictrace20t2	0.54	0.0034641	200
SST	recall	aIC inhibition	CS	R-CS	S2	ictrace21t2	0.54	0.0034641	200
SST	recall	aIC inhibition	CS	R-CS	S2	ictrace3t2	0.54	0.0034641	200
SST	recall	aIC inhibition	CS	R-CS	S2	ictrace17	0.537381	0.00290881	200
SST	recall	aIC inhibition	CS	R-CS	S2	ictrace9t2	0.531375	0.00419075	200
SST	recall	aIC inhibition	CS	R-CS	S2	ictrace22t2	0.5295	0.00371971	200
SST	recall	aIC inhibition	CS	R-CS	S2	ictrace29t2	0.518625	0.0056844	200
SST	recall	aIC inhibition	CS	R-CS	S2	ictrace9	0.509048	0.00481977	200
SST	recall	aIC inhibition	CS	R-CS	S2	ictrace13	0.503333	0.00184842	200
SST	recall	aIC inhibition	CS	R-CS	S2	ictrace15	0.503214	0.0027801	200
SST	recall	aIC inhibition	CS	R-CS	S1	ictrace5	0.502083	0.00181022	200
SST	recall	aIC inhibition	CS	R-CS	S2	ictrace16t2	0.502	0.00223159	200
SST	recall	aIC inhibition	CS	R-CS	S2	ictrace6t2	0.502	0.00223159	200
SST	recall	aIC inhibition	CS	R-CS	S1	ictrace3t2	0.501875	0.00272108	200
SST	recall	aIC inhibition	CS	R-CS	S2	ictrace2	0.501667	0.00195078	200
SST	recall	aIC inhibition	CS	R-CS	S1	ictrace9t2	0.5015	0.00205882	200
SST	recall	aIC inhibition	CS	R-CS	S2	ictrace14t2	0.501	0.00199875	200
SST	recall	aIC inhibition	CS	R-CS	S2	ictrace17t2	0.5005	0.00206125	200
SST	recall	aIC inhibition	CS	R-CS	S2	ictrace19	0.500476	0.00164923	200
SST	recall	aIC inhibition	CS	R-CS	S2	ictrace5	0.500417	0.00208312	200
SST	recall	aIC inhibition	CS	R-CS	S2	ictrace8	0.5	0	200
SST	recall	aIC inhibition	CS	R-CS	S2	ictrace10t2	0.5	0.00173205	200
SST	recall	aIC inhibition	CS	R-CS	S2	ictrace11t2	0.5	0	200
SST	recall	aIC inhibition	CS	R-CS	S2	ictrace2t2	0.5	0	200
SST	recall	aIC inhibition	CS	R-CS	S2	ictrace1	0.49994	0.00129181	200
SST	recall	aIC inhibition	CS	R-CS	S1	ictrace7t2	0.4995	0.00180243	200
SST	recall	aIC inhibition	CS	R-CS	S1	ictrace2	0.498929	0.00147059	200
SST	recall	aIC inhibition	CS	R-CS	S2	ictrace23t2	0.497	0.00222598	200
SST	recall	aIC inhibition	CS	R-CS	S2	ictrace7	0.496905	0.00325508	200
SST	recall	aIC inhibition	CS	R-CS	S2	ictrace25t2	0.4965	0.00238511	200
SST	recall	aIC inhibition	CS	R-CS	S2	ictrace4	0.495595	0.00326493	200
SST	recall	aIC inhibition	CS	R-CS	S2	ictrace14	0.494345	0.00325039	200
SST	recall	aIC inhibition	CS	R-CS	S2	ictrace10	0.4875	0.00210911	200
SST	recall	aIC inhibition	CS	R-CS	S2	ictrace26t2	0.482	0.00396532	200
SST	recall	aIC inhibition	CS	R-CS	S2	ictrace19t2	0.480875	0.00356185	200
SST	recall	aIC inhibition	CS	R-CS	S2	ictrace6	0.480238	0.00260608	200
SST	recall	aIC inhibition	CS	R-CS	S2	ictrace11	0.477857	0.00260282	200
SST	recall	aIC inhibition	CS	R-CS	S1	ictrace3	0.475952	0.00274063	200
SST	recall	aIC inhibition	CS	R-CS	S2	ictrace18	0.475417	0.00257412	200
SST	recall	aIC inhibition	CS	R-CS	S2	ictrace3	0.472976	0.0045478	200
SST	recall	aIC inhibition	CS	R-CS	S2	ictrace13t2	0.4705	0.0033762	200
SST	recall	aIC inhibition	CS	R-CS	S2	ictrace16	0.468452	0.00501892	200
SST	recall	aIC inhibition	CS	R-CS	S2	ictrace27t2	0.46225	0.00389707	200
SST	recall	aIC inhibition	CS	R-CS	S2	ictrace7t2	0.459	0.00471381	200
SST	recall	aIC inhibition	CS	R-CS	S2	ictrace4t2	0.449625	0.00424808	200
SST	recall	aIC inhibition	CS discrimination	-	S3	ictrace6	0.686748	0.0118356	200
SST	recall	aIC inhibition	CS discrimination	-	S3	ictrace1	0.669555	0.010035	200
SST	recall	aIC inhibition	CS discrimination	-	S3	ictrace7	0.661265	0.0099172	200
SST	recall	aIC inhibition	CS discrimination	-	S3	ictrace10	0.628745	0.00756308	200
SST	recall	aIC inhibition	CS discrimination	-	S3	ictrace18	0.626816	0.0121168	200
SST	recall	aIC inhibition	CS discrimination	-	S3	ictrace13	0.624676	0.00955237	200
SST	recall	aIC inhibition	CS discrimination	-	S3	ictrace17	0.622549	0.0207028	200
SST	recall	aIC inhibition	CS discrimination	-	S3	ictrace11	0.619881	0.00828915	200
SST	recall	aIC inhibition	CS discrimination	-	S3	ictrace9	0.615712	0.00772453	200
SST	recall	aIC inhibition	CS discrimination	-	S3	ictrace14	0.611775	0.0065614	200
SST	recall	aIC inhibition	CS discrimination	-	S3	ictrace3	0.611453	0.00630799	200
SST	recall	aIC inhibition	CS discrimination	-	S1	ictrace8	0.610479	0.00663581	200
SST	recall	aIC inhibition	CS discrimination	-	S1	ictrace3	0.606054	0.00938222	200
SST	recall	aIC inhibition	CS discrimination	-	S1	ictrace5	0.604333	0.00950053	200
SST	recall	aIC inhibition	CS discrimination	-	S3	ictrace8	0.602876	0.00504935	200
SST	recall	aIC inhibition	CS discrimination	-	S3	ictrace19	0.592631	0.00970179	200
SST	recall	aIC inhibition	CS discrimination	-	S1	ictrace2	0.571642	0.0120236	200
SST	recall	aIC inhibition	CS discrimination	-	S3	ictrace5	0.535209	0.0124035	200
SST	recall	aIC inhibition	CS discrimination	-	S3	ictrace15	0.517755	0.0151959	200
SST	recall	aIC inhibition	CS discrimination	-	S3	ictrace2	0.479617	0.0163549	200
SST	recall	aIC inhibition	CS discrimination	-	S3	ictrace4	0.478764	0.0174884	200
SST	recall	aIC inhibition	CS discrimination	-	S3	ictrace16	0.463777	0.0185633	200
SST	recall	aIC inhibition	CS discrimination	-	S3	ictrace12	0.452104	0.0148906	200
PKCd	habituation	PBS	CS	F-CS	P2	ictrace6	0.58	0.00824621	200
PKCd	habituation	PBS	CS	F-CS	P4	ictrace2	0.58	0.0052915	200
PKCd	habituation	PBS	CS	F-CS	P4	ictrace7	0.55075	0.00391675	200
PKCd	habituation	PBS	CS	F-CS	P1	ictrace3	0.549375	0.00494481	200
PKCd	habituation	PBS	CS	F-CS	P3	ictrace29	0.5475	0.00496551	200
PKCd	habituation	PBS	CS	F-CS	P2	ictrace3	0.547	0.00457766	200
PKCd	habituation	PBS	CS	F-CS	P4	ictrace5	0.546875	0.00477604	200
PKCd	habituation	PBS	CS	F-CS	P1	ictrace5	0.5305	0.00618506	200
PKCd	habituation	PBS	CS	F-CS	P1	ictrace6	0.529	0.00639687	200
PKCd	habituation	PBS	CS	F-CS	P2	ictrace5	0.5265	0.0063434	200
PKCd	habituation	PBS	CS	F-CS	P4	ictrace1	0.5115	0.00301476	200
PKCd	habituation	PBS	CS	F-CS	P1	ictrace12	0.504	0.00290172	200
PKCd	habituation	PBS	CS	F-CS	P3	ictrace3	0.504	0.00243311	200
PKCd	habituation	PBS	CS	F-CS	P4	ictrace4	0.50375	0.00263836	200
PKCd	habituation	PBS	CS	F-CS	P3	ictrace27	0.5035	0.00178571	200
PKCd	habituation	PBS	CS	F-CS	P3	ictrace11	0.5005	0.00193617	200
PKCd	habituation	PBS	CS	F-CS	P1	ictrace9	0.5	0	200
PKCd	habituation	PBS	CS	F-CS	P2	ictrace1	0.5	0	200
PKCd	habituation	PBS	CS	F-CS	P2	ictrace4	0.5	0.00212132	200
PKCd	habituation	PBS	CS	F-CS	P3	ictrace5	0.5	0	200
PKCd	habituation	PBS	CS	F-CS	P3	ictrace9	0.5	0	200
PKCd	habituation	PBS	CS	F-CS	P1	ictrace4	0.4985	0.00228883	200
PKCd	habituation	PBS	CS	F-CS	P3	ictrace2	0.498	0.00223159	200
PKCd	habituation	PBS	CS	F-CS	P4	ictrace10	0.497	0.00198872	200
PKCd	habituation	PBS	CS	F-CS	P2	ictrace7	0.4965	0.00216535	200
PKCd	habituation	PBS	CS	F-CS	P1	ictrace8	0.488	0.00250599	200
PKCd	habituation	PBS	CS	F-CS	P4	ictrace8	0.484375	0.00593832	200
PKCd	habituation	PBS	CS	F-CS	P2	ictrace11	0.4805	0.00356704	200
PKCd	habituation	PBS	CS	F-CS	P1	ictrace2	0.4755	0.00379127	200
PKCd	habituation	PBS	CS	F-CS	P4	ictrace6	0.4735	0.00342619	200
PKCd	habituation	PBS	CS	F-CS	P3	ictrace17	0.47325	0.00395486	200
PKCd	habituation	PBS	CS	F-CS	P3	ictrace8	0.471	0.00397429	200
PKCd	habituation	PBS	CS	F-CS	P3	ictrace4	0.46575	0.00352363	200
PKCd	habituation	PBS	CS	F-CS	P1	ictrace7	0.4625	0.00349553	200
PKCd	habituation	PBS	CS	F-CS	P1	ictrace15	0.462	0.00477284	200
PKCd	habituation	PBS	CS	F-CS	P1	ictrace14	0.447375	0.00447702	200
PKCd	habituation	PBS	CS	F-CS	P4	ictrace3	0.419	0.00645717	200
PKCd	habituation	PBS	CS	F-CS	P2	ictrace8	0.41375	0.00656875	200
PKCd	habituation	PBS	CS	R-CS	P3	ictrace4	0.58	0.0052915	200
PKCd	habituation	PBS	CS	R-CS	P2	ictrace6	0.545	0.003937	200
PKCd	habituation	PBS	CS	R-CS	P3	ictrace5	0.545	0.003937	200
PKCd	habituation	PBS	CS	R-CS	P4	ictrace1	0.5445	0.00519964	200
PKCd	habituation	PBS	CS	R-CS	P1	ictrace7	0.520875	0.00331086	200
PKCd	habituation	PBS	CS	R-CS	P4	ictrace5	0.5115	0.00535852	200
PKCd	habituation	PBS	CS	R-CS	P3	ictrace8	0.504375	0.00240076	200
PKCd	habituation	PBS	CS	R-CS	P1	ictrace9	0.504	0.00221811	200
PKCd	habituation	PBS	CS	R-CS	P1	ictrace4	0.5015	0.00228883	200
PKCd	habituation	PBS	CS	R-CS	P3	ictrace3	0.5015	0.00687305	200
PKCd	habituation	PBS	CS	R-CS	P2	ictrace11	0.501	0.00186949	200
PKCd	habituation	PBS	CS	R-CS	P4	ictrace4	0.501	0.00223495	200
PKCd	habituation	PBS	CS	R-CS	P2	ictrace5	0.5005	0.00571719	200
PKCd	habituation	PBS	CS	R-CS	P1	ictrace5	0.5	0	200
PKCd	habituation	PBS	CS	R-CS	P2	ictrace4	0.5	0	200
PKCd	habituation	PBS	CS	R-CS	P3	ictrace17	0.5	0.0025	200
PKCd	habituation	PBS	CS	R-CS	P3	ictrace27	0.5	0	200
PKCd	habituation	PBS	CS	R-CS	P4	ictrace10	0.5	0	200
PKCd	habituation	PBS	CS	R-CS	P2	ictrace1	0.4995	0.00206125	200
PKCd	habituation	PBS	CS	R-CS	P2	ictrace8	0.498	0.0021166	200
PKCd	habituation	PBS	CS	R-CS	P3	ictrace29	0.498	0.00186548	200
PKCd	habituation	PBS	CS	R-CS	P2	ictrace7	0.4975	0.00131101	200
PKCd	habituation	PBS	CS	R-CS	P3	ictrace9	0.4975	0.00192841	200
PKCd	habituation	PBS	CS	R-CS	P1	ictrace1	0.495	0.00252488	200
PKCd	habituation	PBS	CS	R-CS	P1	ictrace14	0.492	0.00227596	200
PKCd	habituation	PBS	CS	R-CS	P2	ictrace3	0.4875	0.00254337	200
PKCd	habituation	PBS	CS	R-CS	P1	ictrace2	0.483875	0.00404621	200
PKCd	habituation	PBS	CS	R-CS	P4	ictrace2	0.4805	0.00385341	200
PKCd	habituation	PBS	CS	R-CS	P1	ictrace6	0.475125	0.00416645	200
PKCd	habituation	PBS	CS	R-CS	P1	ictrace12	0.4735	0.00335242	200
PKCd	habituation	PBS	CS	R-CS	P1	ictrace3	0.4705	0.00330133	200
PKCd	habituation	PBS	CS	R-CS	P4	ictrace6	0.469	0.00365821	200
PKCd	habituation	PBS	CS	R-CS	P1	ictrace15	0.467625	0.00414879	200
PKCd	habituation	PBS	CS	R-CS	P4	ictrace3	0.467	0.00339926	200
PKCd	habituation	PBS	CS	R-CS	P4	ictrace7	0.464	0.00353836	200
PKCd	habituation	PBS	CS	R-CS	P3	ictrace2	0.46275	0.00388905	200
PKCd	habituation	PBS	CS	R-CS	P4	ictrace8	0.462	0.00444747	200
PKCd	habituation	PBS	CS	R-CS	P1	ictrace8	0.4565	0.00431292	200
PKCd	habituation	PBS	CS discrimination	-	P1	ictrace5	0.801281	0.0134405	200
PKCd	habituation	PBS	CS discrimination	-	P4	ictrace7	0.688556	0.0108104	200
PKCd	habituation	PBS	CS discrimination	-	P3	ictrace6	0.686752	0.0176641	200
PKCd	habituation	PBS	CS discrimination	-	P4	ictrace5	0.663245	0.0194854	200
PKCd	habituation	PBS	CS discrimination	-	P3	ictrace15	0.653048	0.0170849	200
PKCd	habituation	PBS	CS discrimination	-	P3	ictrace12	0.651493	0.00818323	200
PKCd	habituation	PBS	CS discrimination	-	P1	ictrace1	0.649344	0.0177181	200
PKCd	habituation	PBS	CS discrimination	-	P3	ictrace7	0.64182	0.0173177	200
PKCd	habituation	PBS	CS discrimination	-	P1	ictrace6	0.641336	0.00853865	200
PKCd	habituation	PBS	CS discrimination	-	P4	ictrace11	0.636088	0.0151057	200
PKCd	habituation	PBS	CS discrimination	-	P3	ictrace2	0.633916	0.0130283	200
PKCd	habituation	PBS	CS discrimination	-	P5	ictrace29	0.632027	0.00739516	200
PKCd	habituation	PBS	CS discrimination	-	P3	ictrace14	0.631617	0.01121	200
PKCd	habituation	PBS	CS discrimination	-	P5	ictrace9	0.619048	0.0065432	200
PKCd	habituation	PBS	CS discrimination	-	P5	ictrace2	0.61822	0.0131942	200
PKCd	habituation	PBS	CS discrimination	-	P1	ictrace10	0.616036	0.00513204	200
PKCd	habituation	PBS	CS discrimination	-	P3	ictrace9	0.61403	0.00535997	200
PKCd	habituation	PBS	CS discrimination	-	P5	ictrace5	0.613649	0.00565113	200
PKCd	habituation	PBS	CS discrimination	-	P4	ictrace6	0.613491	0.00569515	200
PKCd	habituation	PBS	CS discrimination	-	P1	ictrace4	0.613285	0.00623472	200
PKCd	habituation	PBS	CS discrimination	-	P5	ictrace8	0.613094	0.0156121	200
PKCd	habituation	PBS	CS discrimination	-	P3	ictrace8	0.612378	0.0123931	200
PKCd	habituation	PBS	CS discrimination	-	P4	ictrace4	0.610966	0.00993379	200
PKCd	habituation	PBS	CS discrimination	-	P5	ictrace4	0.610065	0.00676006	200
PKCd	habituation	PBS	CS discrimination	-	P5	ictrace11	0.609247	0.00755607	200
PKCd	habituation	PBS	CS discrimination	-	P5	ictrace3	0.607467	0.00593655	200
PKCd	habituation	PBS	CS discrimination	-	P5	ictrace27	0.607076	0.0099543	200
PKCd	habituation	PBS	CS discrimination	-	P3	ictrace4	0.60418	0.00912701	200
PKCd	habituation	PBS	CS discrimination	-	P4	ictrace1	0.568923	0.0113874	200
PKCd	habituation	PBS	CS discrimination	-	P5	ictrace17	0.568143	0.0125544	200
PKCd	habituation	PBS	CS discrimination	-	P4	ictrace3	0.564299	0.0145222	200
PKCd	habituation	PBS	CS discrimination	-	P1	ictrace2	0.55256	0.00986424	200
PKCd	habituation	PBS	CS discrimination	-	P1	ictrace3	0.541118	0.0166648	200
PKCd	habituation	PBS	CS discrimination	-	P4	ictrace8	0.535481	0.015803	200
PKCd	habituation	PBS	CS discrimination	-	P1	ictrace7	0.520369	0.0186346	200
PKCd	habituation	PBS	CS discrimination	-	P1	ictrace8	0.515875	0.0199253	200
PKCd	habituation	PBS	CS discrimination	-	P3	ictrace1	0.504879	0.0157572	200
PKCd	habituation	PBS	CS discrimination	-	P3	ictrace3	0.485175	0.0182865	200
PKCd	habituation	PBS	CS discrimination	-	P3	ictrace5	0.381941	0.0168438	200
PKCd	habituation	aIC inhibition	CS	F-CS	P3	ictrace21	0.6	0.00942809	200
PKCd	habituation	aIC inhibition	CS	F-CS	P3	ictrace12	0.5975	0.00903523	200
PKCd	habituation	aIC inhibition	CS	F-CS	P2	ictrace4	0.591667	0.00540062	200
PKCd	habituation	aIC inhibition	CS	F-CS	P1	ictrace1	0.566667	0.0057735	200
PKCd	habituation	aIC inhibition	CS	F-CS	P3	ictrace15	0.566667	0.0057735	200
PKCd	habituation	aIC inhibition	CS	F-CS	P3	ictrace22	0.566667	0.0057735	200
PKCd	habituation	aIC inhibition	CS	F-CS	P3	ictrace4	0.549583	0.013055	200
PKCd	habituation	aIC inhibition	CS	F-CS	P1	ictrace13	0.54625	0.00546286	200
PKCd	habituation	aIC inhibition	CS	F-CS	P1	ictrace12	0.54	0.00484875	200
PKCd	habituation	aIC inhibition	CS	F-CS	P3	ictrace9	0.51625	0.00607955	200
PKCd	habituation	aIC inhibition	CS	F-CS	P1	ictrace5	0.506875	0.00304448	200
PKCd	habituation	aIC inhibition	CS	F-CS	P1	ictrace2	0.506667	0.00388015	200
PKCd	habituation	aIC inhibition	CS	F-CS	P1	ictrace8	0.503542	0.00289842	200
PKCd	habituation	aIC inhibition	CS	F-CS	P1	ictrace4	0.5025	0.00275819	200
PKCd	habituation	aIC inhibition	CS	F-CS	P1	ictrace10	0.5	0	200
PKCd	habituation	aIC inhibition	CS	F-CS	P3	ictrace2	0.5	0	200
PKCd	habituation	aIC inhibition	CS	F-CS	P3	ictrace18	0.499583	0.00742433	200
PKCd	habituation	aIC inhibition	CS	F-CS	P2	ictrace1	0.498333	0.00311582	200
PKCd	habituation	aIC inhibition	CS	F-CS	P2	ictrace3	0.488333	0.00650961	200
PKCd	habituation	aIC inhibition	CS	F-CS	P3	ictrace7	0.479167	0.00673146	200
PKCd	habituation	aIC inhibition	CS	F-CS	P1	ictrace3	0.46625	0.00494229	200
PKCd	habituation	aIC inhibition	CS	F-CS	P1	ictrace11	0.463542	0.0052203	200
PKCd	habituation	aIC inhibition	CS	F-CS	P1	ictrace16	0.4575	0.0057732	200
PKCd	habituation	aIC inhibition	CS	F-CS	P3	ictrace11	0.455	0.00597565	200
PKCd	habituation	aIC inhibition	CS	F-CS	P2	ictrace7	0.4525	0.00505216	200
PKCd	habituation	aIC inhibition	CS	F-CS	P2	ictrace2	0.44875	0.00501482	200
PKCd	habituation	aIC inhibition	CS	F-CS	P3	ictrace8	0.448333	0.00670717	200
PKCd	habituation	aIC inhibition	CS	F-CS	P3	ictrace6	0.445833	0.00564426	200
PKCd	habituation	aIC inhibition	CS	F-CS	P3	ictrace3	0.428125	0.00868496	200
PKCd	habituation	aIC inhibition	CS	F-CS	P3	ictrace20	0.407292	0.0111626	200
PKCd	habituation	aIC inhibition	CS	R-CS	P3	ictrace22	0.64625	0.0131761	200
PKCd	habituation	aIC inhibition	CS	R-CS	P1	ictrace13	0.6175	0.00664554	200
PKCd	habituation	aIC inhibition	CS	R-CS	P2	ictrace5	0.61	0.00900925	200
PKCd	habituation	aIC inhibition	CS	R-CS	P1	ictrace1	0.607917	0.0113735	200
PKCd	habituation	aIC inhibition	CS	R-CS	P2	ictrace3	0.570625	0.00569934	200
PKCd	habituation	aIC inhibition	CS	R-CS	P1	ictrace2	0.566667	0.0057735	200
PKCd	habituation	aIC inhibition	CS	R-CS	P1	ictrace3	0.566667	0.0057735	200
PKCd	habituation	aIC inhibition	CS	R-CS	P2	ictrace1	0.545833	0.00551985	200
PKCd	habituation	aIC inhibition	CS	R-CS	P3	ictrace12	0.545417	0.00670685	200
PKCd	habituation	aIC inhibition	CS	R-CS	P1	ictrace10	0.5325	0.0100656	200
PKCd	habituation	aIC inhibition	CS	R-CS	P3	ictrace6	0.525625	0.00838359	200
PKCd	habituation	aIC inhibition	CS	R-CS	P1	ictrace8	0.520833	0.00881425	200
PKCd	habituation	aIC inhibition	CS	R-CS	P1	ictrace4	0.509792	0.00937721	200
PKCd	habituation	aIC inhibition	CS	R-CS	P2	ictrace7	0.5	0	200
PKCd	habituation	aIC inhibition	CS	R-CS	P3	ictrace2	0.499167	0.00285591	200
PKCd	habituation	aIC inhibition	CS	R-CS	P3	ictrace21	0.49875	0.00279369	200
PKCd	habituation	aIC inhibition	CS	R-CS	P3	ictrace7	0.498333	0.0011726	200
PKCd	habituation	aIC inhibition	CS	R-CS	P3	ictrace3	0.496875	0.00311718	200
PKCd	habituation	aIC inhibition	CS	R-CS	P2	ictrace2	0.496667	0.00310913	200
PKCd	habituation	aIC inhibition	CS	R-CS	P2	ictrace4	0.486875	0.00674805	200
PKCd	habituation	aIC inhibition	CS	R-CS	P1	ictrace16	0.463958	0.0134812	200
PKCd	habituation	aIC inhibition	CS	R-CS	P1	ictrace20	0.461042	0.00512921	200
PKCd	habituation	aIC inhibition	CS	R-CS	P1	ictrace5	0.46	0.00679461	200
PKCd	habituation	aIC inhibition	CS	R-CS	P3	ictrace11	0.457917	0.00581089	200
PKCd	habituation	aIC inhibition	CS	R-CS	P3	ictrace9	0.449792	0.0103384	200
PKCd	habituation	aIC inhibition	CS	R-CS	P3	ictrace20	0.448542	0.00650172	200
PKCd	habituation	aIC inhibition	CS	R-CS	P1	ictrace12	0.44375	0.00570354	200
PKCd	habituation	aIC inhibition	CS	R-CS	P3	ictrace8	0.443125	0.00658266	200
PKCd	habituation	aIC inhibition	CS	R-CS	P3	ictrace1	0.4425	0.00703143	200
PKCd	habituation	aIC inhibition	CS	R-CS	P3	ictrace4	0.439792	0.00755591	200
PKCd	habituation	aIC inhibition	CS	R-CS	P3	ictrace18	0.4375	0.00691591	200
PKCd	habituation	aIC inhibition	CS	R-CS	P3	ictrace15	0.430833	0.00738594	200
PKCd	habituation	aIC inhibition	CS	R-CS	P1	ictrace11	0.418542	0.00710962	200
PKCd	habituation	aIC inhibition	CS discrimination	-	P5	ictrace12	0.730567	0.0203989	200
PKCd	habituation	aIC inhibition	CS discrimination	-	P5	ictrace9	0.725318	0.0109155	200
PKCd	habituation	aIC inhibition	CS discrimination	-	P4	ictrace2	0.718509	0.010966	200
PKCd	habituation	aIC inhibition	CS discrimination	-	P5	ictrace20	0.70226	0.0110057	200
PKCd	habituation	aIC inhibition	CS discrimination	-	P5	ictrace18	0.675581	0.00969179	200
PKCd	habituation	aIC inhibition	CS discrimination	-	P5	ictrace11	0.6732	0.0139067	200
PKCd	habituation	aIC inhibition	CS discrimination	-	P3	ictrace12	0.671873	0.0179014	200
PKCd	habituation	aIC inhibition	CS discrimination	-	P5	ictrace8	0.665949	0.0163382	200
PKCd	habituation	aIC inhibition	CS discrimination	-	P3	ictrace13	0.664722	0.00952613	200
PKCd	habituation	aIC inhibition	CS discrimination	-	P5	ictrace7	0.657585	0.00846523	200
PKCd	habituation	aIC inhibition	CS discrimination	-	P4	ictrace4	0.641263	0.00883577	200
PKCd	habituation	aIC inhibition	CS discrimination	-	P5	ictrace2	0.640157	0.0140285	200
PKCd	habituation	aIC inhibition	CS discrimination	-	P3	ictrace2	0.637107	0.00696357	200
PKCd	habituation	aIC inhibition	CS discrimination	-	P3	ictrace5	0.636539	0.0195435	200
PKCd	habituation	aIC inhibition	CS discrimination	-	P4	ictrace7	0.635947	0.0106011	200
PKCd	habituation	aIC inhibition	CS discrimination	-	P3	ictrace20	0.631802	0.0107125	200
PKCd	habituation	aIC inhibition	CS discrimination	-	P5	ictrace21	0.631799	0.00708909	200
PKCd	habituation	aIC inhibition	CS discrimination	-	P3	ictrace1	0.623749	0.00876098	200
PKCd	habituation	aIC inhibition	CS discrimination	-	P5	ictrace15	0.621828	0.00763036	200
PKCd	habituation	aIC inhibition	CS discrimination	-	P5	ictrace3	0.589792	0.0156395	200
PKCd	habituation	aIC inhibition	CS discrimination	-	P3	ictrace11	0.548263	0.0190508	200
PKCd	habituation	aIC inhibition	CS discrimination	-	P5	ictrace22	0.546264	0.0119869	200
PKCd	habituation	aIC inhibition	CS discrimination	-	P4	ictrace1	0.539001	0.0156603	200
PKCd	habituation	aIC inhibition	CS discrimination	-	P5	ictrace4	0.538649	0.0231597	200
PKCd	habituation	aIC inhibition	CS discrimination	-	P4	ictrace3	0.537696	0.0198161	200
PKCd	habituation	aIC inhibition	CS discrimination	-	P3	ictrace3	0.515933	0.0138062	200
PKCd	habituation	aIC inhibition	CS discrimination	-	P5	ictrace1	0.493687	0.0175354	200
PKCd	habituation	aIC inhibition	CS discrimination	-	P5	ictrace6	0.493385	0.0215146	200
PKCd	habituation	aIC inhibition	CS discrimination	-	P3	ictrace16	0.371764	0.0189445	200
PKCd	habituation	aIC inhibition	CS discrimination	-	P3	ictrace8	0.359916	0.0196246	200
PKCd	habituation	aIC inhibition	CS discrimination	-	P3	ictrace4	0.311152	0.0159944	200
PKCd	habituation	aIC inhibition	CS discrimination	-	P3	ictrace10	0.305612	0.0164459	200
PKCd	habituation	aIC inhibition	CS discrimination	-	P4	ictrace5	0.268439	0.0191284	200
PKCd	RC	early	CS	R-CS	P4	ictrace3	0.538395	0.00328349	200
PKCd	RC	early	CS	R-CS	P2	ictrace6	0.537809	0.00218368	200
PKCd	RC	early	CS	R-CS	P1	ictrace11	0.535914	0.00266357	200
PKCd	RC	early	CS	R-CS	P2	ictrace4	0.532513	0.00118868	200
PKCd	RC	early	CS	R-CS	P1	ictrace15	0.528026	0.00152629	200
PKCd	RC	early	CS	R-CS	P3	ictrace15	0.522059	0.00309514	200
PKCd	RC	early	CS	R-CS	P2	ictrace1	0.521053	0.00217006	200
PKCd	RC	early	CS	R-CS	P5	ictrace10	0.520868	0.00271214	200
PKCd	RC	early	CS	R-CS	P5	ictrace2	0.518803	0.00168078	200
PKCd	RC	early	CS	R-CS	P1	ictrace16	0.51875	0.0014326	200
PKCd	RC	early	CS	R-CS	P3	ictrace14	0.5175	0.00289955	200
PKCd	RC	early	CS	R-CS	P1	ictrace6	0.515526	0.000897056	200
PKCd	RC	early	CS	R-CS	P3	ictrace6	0.515526	0.000897056	200
PKCd	RC	early	CS	R-CS	P1	ictrace9	0.51077	0.00141489	200
PKCd	RC	early	CS	R-CS	P5	ictrace11	0.510316	0.00177557	200
PKCd	RC	early	CS	R-CS	P3	ictrace4	0.508658	0.00231912	200
PKCd	RC	early	CS	R-CS	P1	ictrace2	0.507836	0.00187585	200
PKCd	RC	early	CS	R-CS	P1	ictrace8	0.504829	0.00154052	200
PKCd	RC	early	CS	R-CS	P2	ictrace2	0.504605	0.000861566	200
PKCd	RC	early	CS	R-CS	P1	ictrace5	0.50123	0.000969545	200
PKCd	RC	early	CS	R-CS	P2	ictrace3	0.500375	0.000214876	200
PKCd	RC	early	CS	R-CS	P3	ictrace11	0.5	0.000526316	200
PKCd	RC	early	CS	R-CS	P3	ictrace16	0.499638	0.0011656	200
PKCd	RC	early	CS	R-CS	P3	ictrace13	0.498572	0.00127005	200
PKCd	RC	early	CS	R-CS	P3	ictrace18	0.498553	0.000701144	200
PKCd	RC	early	CS	R-CS	P5	ictrace12	0.498217	0.00147374	200
PKCd	RC	early	CS	R-CS	P3	ictrace19	0.49727	0.00231212	200
PKCd	RC	early	CS	R-CS	P1	ictrace14	0.495513	0.00132788	200
PKCd	RC	early	CS	R-CS	P1	ictrace13	0.495263	0.000962597	200
PKCd	RC	early	CS	R-CS	P5	ictrace6	0.495125	0.00136952	200
PKCd	RC	early	CS	R-CS	P5	ictrace8	0.494342	0.00141565	200
PKCd	RC	early	CS	R-CS	P1	ictrace12	0.494	0.00118204	200
PKCd	RC	early	CS	R-CS	P1	ictrace4	0.493289	0.00103601	200
PKCd	RC	early	CS	R-CS	P3	ictrace12	0.492934	0.00174969	200
PKCd	RC	early	CS	R-CS	P3	ictrace3	0.492895	0.00144988	200
PKCd	RC	early	CS	R-CS	P5	ictrace3	0.492303	0.000850378	200
PKCd	RC	early	CS	R-CS	P3	ictrace8	0.492289	0.00154341	200
PKCd	RC	early	CS	R-CS	P5	ictrace9	0.491974	0.000876705	200
PKCd	RC	early	CS	R-CS	P3	ictrace2	0.491875	0.00098857	200
PKCd	RC	early	CS	R-CS	P3	ictrace9	0.491329	0.00134794	200
PKCd	RC	early	CS	R-CS	P5	ictrace4	0.491276	0.00163659	200
PKCd	RC	early	CS	R-CS	P2	ictrace5	0.491138	0.00234677	200
PKCd	RC	early	CS	R-CS	P1	ictrace10	0.490921	0.000884569	200
PKCd	RC	early	CS	R-CS	P5	ictrace5	0.489099	0.00247203	200
PKCd	RC	early	CS	R-CS	P5	ictrace7	0.488967	0.00210791	200
PKCd	RC	early	CS	R-CS	P3	ictrace1	0.487007	0.00133871	200
PKCd	RC	early	CS	R-CS	P1	ictrace1	0.480092	0.00163172	200
PKCd	RC	early	CS	R-CS	P3	ictrace10	0.480007	0.00190264	200
PKCd	RC	early	CS	R-CS	P1	ictrace3	0.475875	0.00221161	200
PKCd	RC	early	CS	R-CS	P1	ictrace7	0.475592	0.00191845	200
PKCd	RC	early	CS	R-CS	P2	ictrace7	0.473401	0.00160626	200
PKCd	RC	early	CS	R-CS	P3	ictrace5	0.470263	0.00244581	200
PKCd	RC	early	CS	R-CS	P3	ictrace7	0.464053	0.00215387	200
PKCd	RC	early	CS	R-CS	P4	ictrace1	0.451974	0.00365521	200
PKCd	RC	early	US	R-CS	P1	ictrace14	0.61375	0.011699	200
PKCd	RC	early	US	R-CS	P3	ictrace9	0.61375	0.0150828	200
PKCd	RC	early	US	R-CS	P2	ictrace6	0.52625	0.0100619	200
PKCd	RC	early	US	R-CS	P5	ictrace11	0.52	0.00777817	200
PKCd	RC	early	US	R-CS	P3	ictrace4	0.51875	0.00610776	200
PKCd	RC	early	US	R-CS	P3	ictrace14	0.51625	0.00730528	200
PKCd	RC	early	US	R-CS	P1	ictrace3	0.51375	0.00591542	200
PKCd	RC	early	US	R-CS	P3	ictrace7	0.5125	0.00701561	200
PKCd	RC	early	US	R-CS	P5	ictrace5	0.5125	0.00459279	200
PKCd	RC	early	US	R-CS	P1	ictrace15	0.51125	0.00477543	200
PKCd	RC	early	US	R-CS	P2	ictrace1	0.51125	0.00509212	200
PKCd	RC	early	US	R-CS	P1	ictrace12	0.5075	0.00527672	200
PKCd	RC	early	US	R-CS	P2	ictrace2	0.5075	0.00527672	200
PKCd	RC	early	US	R-CS	P1	ictrace11	0.50625	0.0051349	200
PKCd	RC	early	US	R-CS	P2	ictrace4	0.50625	0.00372387	200
PKCd	RC	early	US	R-CS	P2	ictrace5	0.50625	0.00448522	200
PKCd	RC	early	US	R-CS	P5	ictrace12	0.50625	0.00482102	200
PKCd	RC	early	US	R-CS	P1	ictrace4	0.505	0.00351781	200
PKCd	RC	early	US	R-CS	P3	ictrace19	0.505	0.00431567	200
PKCd	RC	early	US	R-CS	P1	ictrace13	0.50375	0.00413729	200
PKCd	RC	early	US	R-CS	P1	ictrace5	0.50375	0.00449913	200
PKCd	RC	early	US	R-CS	P2	ictrace7	0.50375	0.00374061	200
PKCd	RC	early	US	R-CS	P5	ictrace10	0.50375	0.00572208	200
PKCd	RC	early	US	R-CS	P5	ictrace6	0.50375	0.00278248	200
PKCd	RC	early	US	R-CS	P5	ictrace7	0.50375	0.00374061	200
PKCd	RC	early	US	R-CS	P3	ictrace1	0.5025	0.00249374	200
PKCd	RC	early	US	R-CS	P5	ictrace4	0.5025	0.00305675	200
PKCd	RC	early	US	R-CS	P5	ictrace8	0.5025	0.00394889	200
PKCd	RC	early	US	R-CS	P3	ictrace11	0.50125	0.00124687	200
PKCd	RC	early	US	R-CS	P1	ictrace10	0.5	0	200
PKCd	RC	early	US	R-CS	P1	ictrace9	0.5	0.00559017	200
PKCd	RC	early	US	R-CS	P5	ictrace3	0.5	0.00176777	200
PKCd	RC	early	US	R-CS	P5	ictrace9	0.5	0	200
PKCd	RC	early	US	R-CS	P1	ictrace7	0.49875	0.00484042	200
PKCd	RC	early	US	R-CS	P3	ictrace5	0.49875	0.00374896	200
PKCd	RC	early	US	R-CS	P3	ictrace8	0.49875	0.00124687	200
PKCd	RC	early	US	R-CS	P1	ictrace6	0.4975	0.00175891	200
PKCd	RC	early	US	R-CS	P3	ictrace12	0.4975	0.00305675	200
PKCd	RC	early	US	R-CS	P3	ictrace16	0.4975	0.00637132	200
PKCd	RC	early	US	R-CS	P3	ictrace18	0.4975	0.00175891	200
PKCd	RC	early	US	R-CS	P2	ictrace3	0.49625	0.00214876	200
PKCd	RC	early	US	R-CS	P3	ictrace15	0.49625	0.00483396	200
PKCd	RC	early	US	R-CS	P3	ictrace6	0.49375	0.00372387	200
PKCd	RC	early	US	R-CS	P1	ictrace8	0.48625	0.00733091	200
PKCd	RC	early	US	R-CS	P3	ictrace10	0.48625	0.00617391	200
PKCd	RC	early	US	R-CS	P5	ictrace2	0.48375	0.00663266	200
PKCd	RC	early	US	R-CS	P1	ictrace1	0.48125	0.00748697	200
PKCd	RC	early	US	R-CS	P3	ictrace13	0.48	0.00595819	200
PKCd	RC	early	US	R-CS	P1	ictrace2	0.4775	0.0125237	200
PKCd	RC	early	US	R-CS	P4	ictrace1	0.475	0.011726	200
PKCd	RC	early	US	R-CS	P3	ictrace2	0.4725	0.00806032	200
PKCd	RC	early	US	R-CS	P1	ictrace16	0.4675	0.0126627	200
PKCd	RC	early	US	R-CS	P4	ictrace3	0.4675	0.0103546	200
PKCd	RC	early	US	R-CS	P3	ictrace3	0.44375	0.0124295	200
PKCd	RC	late	CS	R-CS	P4	ictrace5	0.542763	0.0013786	200
PKCd	RC	late	CS	R-CS	P3	ictrace3	0.540309	0.00270946	200
PKCd	RC	late	CS	R-CS	P1	ictrace10	0.537763	0.00104897	200
PKCd	RC	late	CS	R-CS	P5	ictrace4	0.53352	0.00303463	200
PKCd	RC	late	CS	R-CS	P3	ictrace10	0.526118	0.002298	200
PKCd	RC	late	CS	R-CS	P2	ictrace9	0.525717	0.0017233	200
PKCd	RC	late	CS	R-CS	P2	ictrace8	0.524204	0.00213764	200
PKCd	RC	late	CS	R-CS	P3	ictrace15	0.523763	0.00252854	200
PKCd	RC	late	CS	R-CS	P1	ictrace14	0.518993	0.00204095	200
PKCd	RC	late	CS	R-CS	P1	ictrace6	0.516842	0.00182407	200
PKCd	RC	late	CS	R-CS	P3	ictrace2	0.514888	0.00135429	200
PKCd	RC	late	CS	R-CS	P2	ictrace4	0.512105	0.000927422	200
PKCd	RC	late	CS	R-CS	P3	ictrace19	0.512053	0.00096974	200
PKCd	RC	late	CS	R-CS	P5	ictrace5	0.511671	0.00177381	200
PKCd	RC	late	CS	R-CS	P3	ictrace23	0.511368	0.00118491	200
PKCd	RC	late	CS	R-CS	P3	ictrace24	0.511263	0.0010287	200
PKCd	RC	late	CS	R-CS	P1	ictrace11	0.509579	0.00112094	200
PKCd	RC	late	CS	R-CS	P2	ictrace1	0.509171	0.00163996	200
PKCd	RC	late	CS	R-CS	P4	ictrace2	0.507592	0.0018784	200
PKCd	RC	late	CS	R-CS	P2	ictrace6	0.507566	0.00208271	200
PKCd	RC	late	CS	R-CS	P2	ictrace5	0.50625	0.00162111	200
PKCd	RC	late	CS	R-CS	P2	ictrace2	0.506079	0.00135959	200
PKCd	RC	late	CS	R-CS	P2	ictrace12	0.505592	0.00197804	200
PKCd	RC	late	CS	R-CS	P1	ictrace4	0.505066	0.00236505	200
PKCd	RC	late	CS	R-CS	P1	ictrace16	0.504868	0.000854301	200
PKCd	RC	late	CS	R-CS	P3	ictrace18	0.503592	0.00139814	200
PKCd	RC	late	CS	R-CS	P1	ictrace13	0.502954	0.00143178	200
PKCd	RC	late	CS	R-CS	P5	ictrace10	0.501447	0.000952426	200
PKCd	RC	late	CS	R-CS	P1	ictrace12	0.501316	0.00133862	200
PKCd	RC	late	CS	R-CS	P3	ictrace17	0.500967	0.00105302	200
PKCd	RC	late	CS	R-CS	P5	ictrace9	0.500612	0.0012179	200
PKCd	RC	late	CS	R-CS	P3	ictrace22	0.500263	0.000767005	200
PKCd	RC	late	CS	R-CS	P3	ictrace9	0.500132	0.00134889	200
PKCd	RC	late	CS	R-CS	P3	ictrace12	0.5	0	200
PKCd	RC	late	CS	R-CS	P1	ictrace1	0.49975	0.000530035	200
PKCd	RC	late	CS	R-CS	P3	ictrace16	0.499737	0.00119135	200
PKCd	RC	late	CS	R-CS	P3	ictrace7	0.499342	0.00057165	200
PKCd	RC	late	CS	R-CS	P1	ictrace3	0.499217	0.00150133	200
PKCd	RC	late	CS	R-CS	P3	ictrace5	0.497632	0.0011649	200
PKCd	RC	late	CS	R-CS	P3	ictrace6	0.4975	0.00106241	200
PKCd	RC	late	CS	R-CS	P5	ictrace7	0.496572	0.00118278	200
PKCd	RC	late	CS	R-CS	P1	ictrace18	0.496447	0.0014965	200
PKCd	RC	late	CS	R-CS	P1	ictrace17	0.495658	0.0018211	200
PKCd	RC	late	CS	R-CS	P3	ictrace13	0.495638	0.000704321	200
PKCd	RC	late	CS	R-CS	P1	ictrace15	0.49223	0.000960373	200
PKCd	RC	late	CS	R-CS	P5	ictrace6	0.491539	0.000852856	200
PKCd	RC	late	CS	R-CS	P1	ictrace7	0.491204	0.00119413	200
PKCd	RC	late	CS	R-CS	P3	ictrace20	0.490993	0.00219209	200
PKCd	RC	late	CS	R-CS	P4	ictrace3	0.490553	0.00167728	200
PKCd	RC	late	CS	R-CS	P1	ictrace5	0.490289	0.00153439	200
PKCd	RC	late	CS	R-CS	P1	ictrace19	0.490263	0.00157136	200
PKCd	RC	late	CS	R-CS	P4	ictrace4	0.489566	0.00178438	200
PKCd	RC	late	CS	R-CS	P3	ictrace11	0.489434	0.00145993	200
PKCd	RC	late	CS	R-CS	P1	ictrace9	0.48725	0.00135802	200
PKCd	RC	late	CS	R-CS	P3	ictrace25	0.486974	0.00132885	200
PKCd	RC	late	CS	R-CS	P3	ictrace1	0.485362	0.00117183	200
PKCd	RC	late	CS	R-CS	P3	ictrace14	0.482987	0.00173969	200
PKCd	RC	late	CS	R-CS	P3	ictrace8	0.482388	0.00199193	200
PKCd	RC	late	CS	R-CS	P3	ictrace21	0.476296	0.0023408	200
PKCd	RC	late	CS	R-CS	P3	ictrace4	0.472105	0.00209777	200
PKCd	RC	late	CS	R-CS	P2	ictrace7	0.472086	0.00233129	200
PKCd	RC	late	CS	R-CS	P2	ictrace3	0.47023	0.00315871	200
PKCd	RC	late	CS	R-CS	P1	ictrace20	0.468263	0.00250679	200
PKCd	RC	late	US	R-CS	P5	ictrace4	0.65125	0.0144347	200
PKCd	RC	late	US	R-CS	P4	ictrace2	0.604583	0.0104083	200
PKCd	RC	late	US	R-CS	P3	ictrace9	0.590833	0.00835809	200
PKCd	RC	late	US	R-CS	P3	ictrace22	0.575417	0.00859177	200
PKCd	RC	late	US	R-CS	P3	ictrace19	0.570833	0.00792215	200
PKCd	RC	late	US	R-CS	P3	ictrace12	0.563333	0.00819129	200
PKCd	RC	late	US	R-CS	P3	ictrace25	0.547083	0.00830365	200
PKCd	RC	late	US	R-CS	P1	ictrace9	0.544583	0.00857721	200
PKCd	RC	late	US	R-CS	P3	ictrace16	0.526667	0.00978519	200
PKCd	RC	late	US	R-CS	P1	ictrace17	0.525	0.00513701	200
PKCd	RC	late	US	R-CS	P2	ictrace3	0.524167	0.00596838	200
PKCd	RC	late	US	R-CS	P4	ictrace5	0.524167	0.00505491	200
PKCd	RC	late	US	R-CS	P1	ictrace14	0.523333	0.00574819	200
PKCd	RC	late	US	R-CS	P2	ictrace1	0.523333	0.00580828	200
PKCd	RC	late	US	R-CS	P3	ictrace18	0.520833	0.00512856	200
PKCd	RC	late	US	R-CS	P2	ictrace8	0.52	0.00500833	200
PKCd	RC	late	US	R-CS	P3	ictrace7	0.51625	0.00889166	200
PKCd	RC	late	US	R-CS	P1	ictrace4	0.512917	0.00421215	200
PKCd	RC	late	US	R-CS	P2	ictrace6	0.512917	0.00449141	200
PKCd	RC	late	US	R-CS	P1	ictrace7	0.51125	0.00495387	200
PKCd	RC	late	US	R-CS	P2	ictrace4	0.509583	0.00339411	200
PKCd	RC	late	US	R-CS	P2	ictrace7	0.509583	0.00534171	200
PKCd	RC	late	US	R-CS	P1	ictrace10	0.508333	0.00317324	200
PKCd	RC	late	US	R-CS	P1	ictrace12	0.508333	0.00471405	200
PKCd	RC	late	US	R-CS	P3	ictrace20	0.505417	0.00425235	200
PKCd	RC	late	US	R-CS	P1	ictrace6	0.505	0.00398086	200
PKCd	RC	late	US	R-CS	P4	ictrace3	0.505	0.00455064	200
PKCd	RC	late	US	R-CS	P2	ictrace9	0.504583	0.00349591	200
PKCd	RC	late	US	R-CS	P3	ictrace17	0.504583	0.00271298	200
PKCd	RC	late	US	R-CS	P4	ictrace4	0.50375	0.00374061	200
PKCd	RC	late	US	R-CS	P1	ictrace3	0.503333	0.00281612	200
PKCd	RC	late	US	R-CS	P1	ictrace18	0.502917	0.00350483	200
PKCd	RC	late	US	R-CS	P5	ictrace9	0.502917	0.00296844	200
PKCd	RC	late	US	R-CS	P2	ictrace5	0.5025	0.00305675	200
PKCd	RC	late	US	R-CS	P3	ictrace21	0.5025	0.00416291	200
PKCd	RC	late	US	R-CS	P3	ictrace24	0.502083	0.00259791	200
PKCd	RC	late	US	R-CS	P5	ictrace6	0.501667	0.0024267	200
PKCd	RC	late	US	R-CS	P1	ictrace1	0.500833	0.000831247	200
PKCd	RC	late	US	R-CS	P3	ictrace11	0.500833	0.00144217	200
PKCd	RC	late	US	R-CS	P3	ictrace13	0.500833	0.00249931	200
PKCd	RC	late	US	R-CS	P1	ictrace13	0.500417	0.00224363	200
PKCd	RC	late	US	R-CS	P3	ictrace14	0.500417	0.00171771	200
PKCd	RC	late	US	R-CS	P5	ictrace5	0.500417	0.00190918	200
PKCd	RC	late	US	R-CS	P1	ictrace11	0.5	0	200
PKCd	RC	late	US	R-CS	P1	ictrace16	0.5	0	200
PKCd	RC	late	US	R-CS	P5	ictrace10	0.5	0.00306186	200
PKCd	RC	late	US	R-CS	P1	ictrace20	0.499583	0.00253431	200
PKCd	RC	late	US	R-CS	P3	ictrace4	0.499167	0.00300405	200
PKCd	RC	late	US	R-CS	P3	ictrace6	0.49875	0.00124687	200
PKCd	RC	late	US	R-CS	P2	ictrace12	0.498333	0.00212132	200
PKCd	RC	late	US	R-CS	P3	ictrace1	0.497917	0.00149507	200
PKCd	RC	late	US	R-CS	P3	ictrace23	0.4975	0.00530035	200
PKCd	RC	late	US	R-CS	P1	ictrace15	0.497083	0.00438501	200
PKCd	RC	late	US	R-CS	P5	ictrace7	0.497083	0.0025939	200
PKCd	RC	late	US	R-CS	P3	ictrace5	0.493333	0.00313803	200
PKCd	RC	late	US	R-CS	P3	ictrace15	0.492917	0.00474259	200
PKCd	RC	late	US	R-CS	P1	ictrace19	0.49125	0.0043059	200
PKCd	RC	late	US	R-CS	P2	ictrace2	0.487917	0.00616322	200
PKCd	RC	late	US	R-CS	P1	ictrace5	0.4875	0.00671208	200
PKCd	RC	late	US	R-CS	P3	ictrace10	0.485833	0.00618325	200
PKCd	RC	late	US	R-CS	P3	ictrace2	0.475417	0.00679045	200
PKCd	RC	late	US	R-CS	P3	ictrace3	0.470417	0.00606382	200
PKCd	RC	late	US	R-CS	P3	ictrace8	0.469583	0.00738752	200
PKCd	FC	early	CS	F-CS	P4	ictrace8	0.6	0.0057735	200
PKCd	FC	early	CS	F-CS	P3	ictrace22	0.5775	0.00622244	200
PKCd	FC	early	CS	F-CS	P5	ictrace10	0.566667	0.0057735	200
PKCd	FC	early	CS	F-CS	P3	ictrace12	0.558333	0.00513701	200
PKCd	FC	early	CS	F-CS	P3	ictrace20	0.558333	0.00513701	200
PKCd	FC	early	CS	F-CS	P3	ictrace7	0.558333	0.00513701	200
PKCd	FC	early	CS	F-CS	P4	ictrace6	0.546667	0.00554777	200
PKCd	FC	early	CS	F-CS	P1	ictrace7	0.525833	0.00515018	200
PKCd	FC	early	CS	F-CS	P1	ictrace12	0.521458	0.00557444	200
PKCd	FC	early	CS	F-CS	P3	ictrace1	0.518542	0.00828998	200
PKCd	FC	early	CS	F-CS	P3	ictrace11	0.516875	0.00442037	200
PKCd	FC	early	CS	F-CS	P1	ictrace9	0.505	0.00286502	200
PKCd	FC	early	CS	F-CS	P3	ictrace5	0.505	0.00611351	200
PKCd	FC	early	CS	F-CS	P3	ictrace8	0.503333	0.00371932	200
PKCd	FC	early	CS	F-CS	P3	ictrace3	0.503125	0.00206108	200
PKCd	FC	early	CS	F-CS	P1	ictrace2	0.5025	0.00399261	200
PKCd	FC	early	CS	F-CS	P2	ictrace9	0.5025	0.00343137	200
PKCd	FC	early	CS	F-CS	P3	ictrace15	0.500833	0.00416625	200
PKCd	FC	early	CS	F-CS	P2	ictrace6	0.500625	0.00272395	200
PKCd	FC	early	CS	F-CS	P1	ictrace14	0.5	0	200
PKCd	FC	early	CS	F-CS	P1	ictrace4	0.5	0	200
PKCd	FC	early	CS	F-CS	P2	ictrace2	0.5	0	200
PKCd	FC	early	CS	F-CS	P2	ictrace3	0.5	0.00233854	200
PKCd	FC	early	CS	F-CS	P2	ictrace4	0.5	0.00153093	200
PKCd	FC	early	CS	F-CS	P2	ictrace5	0.5	0	200
PKCd	FC	early	CS	F-CS	P2	ictrace7	0.5	0	200
PKCd	FC	early	CS	F-CS	P3	ictrace10	0.5	0	200
PKCd	FC	early	CS	F-CS	P3	ictrace4	0.5	0	200
PKCd	FC	early	CS	F-CS	P4	ictrace4	0.5	0.00637377	200
PKCd	FC	early	CS	F-CS	P5	ictrace12	0.5	0	200
PKCd	FC	early	CS	F-CS	P5	ictrace13	0.5	0	200
PKCd	FC	early	CS	F-CS	P5	ictrace2	0.5	0	200
PKCd	FC	early	CS	F-CS	P5	ictrace6	0.5	0	200
PKCd	FC	early	CS	F-CS	P5	ictrace8	0.5	0	200
PKCd	FC	early	CS	F-CS	P5	ictrace9	0.5	0	200
PKCd	FC	early	CS	F-CS	P4	ictrace7	0.499167	0.00363194	200
PKCd	FC	early	CS	F-CS	P4	ictrace5	0.49875	0.00233686	200
PKCd	FC	early	CS	F-CS	P3	ictrace25	0.498125	0.00257353	200
PKCd	FC	early	CS	F-CS	P1	ictrace6	0.4975	0.0019685	200
PKCd	FC	early	CS	F-CS	P1	ictrace8	0.4975	0.00343137	200
PKCd	FC	early	CS	F-CS	P3	ictrace9	0.496042	0.00337985	200
PKCd	FC	early	CS	F-CS	P2	ictrace8	0.495833	0.00362045	200
PKCd	FC	early	CS	F-CS	P1	ictrace10	0.495	0.00286502	200
PKCd	FC	early	CS	F-CS	P1	ictrace13	0.495	0.00370997	200
PKCd	FC	early	CS	F-CS	P1	ictrace11	0.493333	0.00329983	200
PKCd	FC	early	CS	F-CS	P3	ictrace17	0.479375	0.00444876	200
PKCd	FC	early	CS	F-CS	P3	ictrace23	0.479167	0.00666015	200
PKCd	FC	early	CS	F-CS	P1	ictrace3	0.473958	0.0052987	200
PKCd	FC	early	CS	F-CS	P2	ictrace1	0.458333	0.00664057	200
PKCd	FC	early	CS	F-CS	P1	ictrace1	0.456667	0.00592077	200
PKCd	FC	early	CS	F-CS	P3	ictrace2	0.450833	0.00550221	200
PKCd	FC	early	CS	F-CS	P3	ictrace6	0.444167	0.00568594	200
PKCd	FC	early	CS	F-CS	P3	ictrace13	0.419792	0.00624262	200
PKCd	FC	early	CS	F-CS	P4	ictrace2	0.417917	0.00745304	200
PKCd	FC	early	CS	F-CS	P5	ictrace7	0.413958	0.00701609	200
PKCd	FC	early	CS	F-CS	P1	ictrace5	0.41125	0.00609039	200
PKCd	FC	early	US	F-CS	P3	ictrace10	0.666667	0.00745356	200
PKCd	FC	early	US	F-CS	P2	ictrace7	0.616667	0.010274	200
PKCd	FC	early	US	F-CS	P4	ictrace8	0.6	0.0057735	200
PKCd	FC	early	US	F-CS	P5	ictrace2	0.6	0.00942809	200
PKCd	FC	early	US	F-CS	P3	ictrace4	0.591667	0.00540062	200
PKCd	FC	early	US	F-CS	P3	ictrace9	0.591667	0.00540062	200
PKCd	FC	early	US	F-CS	P5	ictrace9	0.591667	0.00920447	200
PKCd	FC	early	US	F-CS	P3	ictrace3	0.583333	0.00745356	200
PKCd	FC	early	US	F-CS	P1	ictrace5	0.566667	0.0057735	200
PKCd	FC	early	US	F-CS	P1	ictrace6	0.566667	0.0057735	200
PKCd	FC	early	US	F-CS	P3	ictrace23	0.566667	0.0057735	200
PKCd	FC	early	US	F-CS	P1	ictrace9	0.558333	0.00513701	200
PKCd	FC	early	US	F-CS	P2	ictrace2	0.558333	0.00513701	200
PKCd	FC	early	US	F-CS	P2	ictrace5	0.558333	0.00513701	200
PKCd	FC	early	US	F-CS	P2	ictrace6	0.558333	0.00513701	200
PKCd	FC	early	US	F-CS	P2	ictrace8	0.558333	0.00513701	200
PKCd	FC	early	US	F-CS	P2	ictrace9	0.558333	0.00513701	200
PKCd	FC	early	US	F-CS	P3	ictrace2	0.558333	0.00905232	200
PKCd	FC	early	US	F-CS	P3	ictrace7	0.558333	0.00513701	200
PKCd	FC	early	US	F-CS	P4	ictrace7	0.558333	0.00513701	200
PKCd	FC	early	US	F-CS	P5	ictrace12	0.558333	0.00513701	200
PKCd	FC	early	US	F-CS	P5	ictrace13	0.558333	0.00513701	200
PKCd	FC	early	US	F-CS	P5	ictrace6	0.558333	0.00513701	200
PKCd	FC	early	US	F-CS	P1	ictrace2	0.504167	0.00321401	200
PKCd	FC	early	US	F-CS	P2	ictrace4	0.5025	0.00322264	200
PKCd	FC	early	US	F-CS	P3	ictrace25	0.5025	0.00322264	200
PKCd	FC	early	US	F-CS	P1	ictrace4	0.501875	0.00272108	200
PKCd	FC	early	US	F-CS	P1	ictrace8	0.500833	0.00322695	200
PKCd	FC	early	US	F-CS	P1	ictrace12	0.5	0	200
PKCd	FC	early	US	F-CS	P3	ictrace5	0.5	0.00433013	200
PKCd	FC	early	US	F-CS	P4	ictrace6	0.5	0	200
PKCd	FC	early	US	F-CS	P5	ictrace8	0.5	0	200
PKCd	FC	early	US	F-CS	P1	ictrace14	0.49875	0.00318566	200
PKCd	FC	early	US	F-CS	P2	ictrace3	0.49875	0.00265018	200
PKCd	FC	early	US	F-CS	P1	ictrace11	0.4975	0.00343137	200
PKCd	FC	early	US	F-CS	P1	ictrace10	0.495	0.00389266	200
PKCd	FC	early	US	F-CS	P1	ictrace3	0.494375	0.00254606	200
PKCd	FC	early	US	F-CS	P3	ictrace12	0.494167	0.00360892	200
PKCd	FC	early	US	F-CS	P3	ictrace22	0.490833	0.00357412	200
PKCd	FC	early	US	F-CS	P5	ictrace10	0.4725	0.00634949	200
PKCd	FC	early	US	F-CS	P5	ictrace7	0.471667	0.0065733	200
PKCd	FC	early	US	F-CS	P3	ictrace8	0.4675	0.00612486	200
PKCd	FC	early	US	F-CS	P3	ictrace11	0.466667	0.00646169	200
PKCd	FC	early	US	F-CS	P3	ictrace13	0.4625	0.00639417	200
PKCd	FC	early	US	F-CS	P1	ictrace13	0.441667	0.00513701	200
PKCd	FC	early	US	F-CS	P3	ictrace15	0.441667	0.00513701	200
PKCd	FC	early	US	F-CS	P3	ictrace17	0.441667	0.00513701	200
PKCd	FC	early	US	F-CS	P3	ictrace6	0.441667	0.00513701	200
PKCd	FC	early	US	F-CS	P4	ictrace5	0.441667	0.00513701	200
PKCd	FC	early	US	F-CS	P1	ictrace7	0.433333	0.0057735	200
PKCd	FC	early	US	F-CS	P2	ictrace1	0.433333	0.0057735	200
PKCd	FC	early	US	F-CS	P3	ictrace20	0.433333	0.0057735	200
PKCd	FC	early	US	F-CS	P4	ictrace4	0.416667	0.00745356	200
PKCd	FC	early	US	F-CS	P1	ictrace1	0.375	0.00456435	200
PKCd	FC	early	US	F-CS	P4	ictrace2	0.367292	0.00923308	200
PKCd	FC	early	US	F-CS	P3	ictrace1	0.366667	0.00471405	200
PKCd	FC	late	CS	F-CS	P2	ictrace1	0.558333	0.00513701	200
PKCd	FC	late	CS	F-CS	P3	ictrace7	0.558333	0.00513701	200
PKCd	FC	late	CS	F-CS	P1	ictrace9	0.546458	0.0055291	200
PKCd	FC	late	CS	F-CS	P1	ictrace17	0.545833	0.00564426	200
PKCd	FC	late	CS	F-CS	P4	ictrace10	0.545208	0.00523557	200
PKCd	FC	late	CS	F-CS	P1	ictrace8	0.540833	0.00506006	200
PKCd	FC	late	CS	F-CS	P1	ictrace18	0.534375	0.00476385	200
PKCd	FC	late	CS	F-CS	P3	ictrace17	0.534167	0.00480307	200
PKCd	FC	late	CS	F-CS	P3	ictrace8	0.517917	0.00585939	200
PKCd	FC	late	CS	F-CS	P4	ictrace4	0.516458	0.00648113	200
PKCd	FC	late	CS	F-CS	P1	ictrace2	0.505833	0.00320102	200
PKCd	FC	late	CS	F-CS	P2	ictrace8	0.503333	0.00424264	200
PKCd	FC	late	CS	F-CS	P1	ictrace13	0.503125	0.00241051	200
PKCd	FC	late	CS	F-CS	P3	ictrace9	0.503125	0.00271534	200
PKCd	FC	late	CS	F-CS	P1	ictrace7	0.5025	0.00343137	200
PKCd	FC	late	CS	F-CS	P2	ictrace12	0.501875	0.00107438	200
PKCd	FC	late	CS	F-CS	P3	ictrace4	0.501875	0.0027997	200
PKCd	FC	late	CS	F-CS	P3	ictrace13	0.50125	0.00293018	200
PKCd	FC	late	CS	F-CS	P1	ictrace16	0.5	0	200
PKCd	FC	late	CS	F-CS	P1	ictrace5	0.5	0	200
PKCd	FC	late	CS	F-CS	P2	ictrace11	0.5	0	200
PKCd	FC	late	CS	F-CS	P2	ictrace13	0.5	0	200
PKCd	FC	late	CS	F-CS	P2	ictrace2	0.5	0	200
PKCd	FC	late	CS	F-CS	P2	ictrace4	0.5	0.00233854	200
PKCd	FC	late	CS	F-CS	P2	ictrace9	0.5	0	200
PKCd	FC	late	CS	F-CS	P3	ictrace1	0.5	0	200
PKCd	FC	late	CS	F-CS	P3	ictrace10	0.5	0	200
PKCd	FC	late	CS	F-CS	P3	ictrace12	0.5	0	200
PKCd	FC	late	CS	F-CS	P3	ictrace14	0.5	0	200
PKCd	FC	late	CS	F-CS	P3	ictrace2	0.5	0	200
PKCd	FC	late	CS	F-CS	P3	ictrace3	0.5	0	200
PKCd	FC	late	CS	F-CS	P4	ictrace5	0.5	0	200
PKCd	FC	late	CS	F-CS	P2	ictrace3	0.499375	0.00272395	200
PKCd	FC	late	CS	F-CS	P1	ictrace15	0.499167	0.00343542	200
PKCd	FC	late	CS	F-CS	P1	ictrace6	0.499167	0.00322695	200
PKCd	FC	late	CS	F-CS	P4	ictrace9	0.499167	0.00322695	200
PKCd	FC	late	CS	F-CS	P1	ictrace14	0.4975	0.00322264	200
PKCd	FC	late	CS	F-CS	P3	ictrace5	0.4975	0.00249374	200
PKCd	FC	late	CS	F-CS	P1	ictrace3	0.495833	0.00274811	200
PKCd	FC	late	CS	F-CS	P1	ictrace4	0.495833	0.00321401	200
PKCd	FC	late	CS	F-CS	P1	ictrace1	0.48	0.00702772	200
PKCd	FC	late	CS	F-CS	P3	ictrace11	0.47875	0.0037959	200
PKCd	FC	late	CS	F-CS	P1	ictrace10	0.471458	0.00607089	200
PKCd	FC	late	CS	F-CS	P2	ictrace5	0.461042	0.00497457	200
PKCd	FC	late	CS	F-CS	P2	ictrace10	0.4575	0.00492971	200
PKCd	FC	late	CS	F-CS	P3	ictrace6	0.451042	0.00510682	200
PKCd	FC	late	CS	F-CS	P4	ictrace11	0.44875	0.00501482	200
PKCd	FC	late	CS	F-CS	P2	ictrace7	0.445625	0.00636831	200
PKCd	FC	late	CS	F-CS	P2	ictrace14	0.444167	0.00556246	200
PKCd	FC	late	CS	F-CS	P1	ictrace12	0.4425	0.00572488	200
PKCd	FC	late	CS	F-CS	P4	ictrace2	0.44125	0.00876581	200
PKCd	FC	late	CS	F-CS	P2	ictrace6	0.4275	0.00679077	200
PKCd	FC	late	US	F-CS	P2	ictrace2	0.625	0.00456435	200
PKCd	FC	late	US	F-CS	P1	ictrace2	0.591667	0.00540062	200
PKCd	FC	late	US	F-CS	P2	ictrace4	0.591667	0.00540062	200
PKCd	FC	late	US	F-CS	P2	ictrace9	0.591667	0.00540062	200
PKCd	FC	late	US	F-CS	P3	ictrace8	0.591667	0.00540062	200
PKCd	FC	late	US	F-CS	P2	ictrace13	0.583333	0.00745356	200
PKCd	FC	late	US	F-CS	P3	ictrace3	0.583333	0.00745356	200
PKCd	FC	late	US	F-CS	P1	ictrace1	0.566667	0.0057735	200
PKCd	FC	late	US	F-CS	P1	ictrace15	0.566667	0.0057735	200
PKCd	FC	late	US	F-CS	P2	ictrace10	0.566667	0.0057735	200
PKCd	FC	late	US	F-CS	P3	ictrace12	0.566667	0.0057735	200
PKCd	FC	late	US	F-CS	P3	ictrace17	0.566667	0.0057735	200
PKCd	FC	late	US	F-CS	P4	ictrace9	0.566667	0.0057735	200
PKCd	FC	late	US	F-CS	P1	ictrace17	0.558333	0.00513701	200
PKCd	FC	late	US	F-CS	P2	ictrace11	0.558333	0.00513701	200
PKCd	FC	late	US	F-CS	P3	ictrace10	0.558333	0.00513701	200
PKCd	FC	late	US	F-CS	P3	ictrace11	0.558333	0.00513701	200
PKCd	FC	late	US	F-CS	P3	ictrace14	0.558333	0.00513701	200
PKCd	FC	late	US	F-CS	P3	ictrace4	0.558333	0.00513701	200
PKCd	FC	late	US	F-CS	P3	ictrace5	0.558333	0.00513701	200
PKCd	FC	late	US	F-CS	P2	ictrace3	0.5075	0.00288314	200
PKCd	FC	late	US	F-CS	P1	ictrace6	0.505	0.00309794	200
PKCd	FC	late	US	F-CS	P3	ictrace7	0.504167	0.00342327	200
PKCd	FC	late	US	F-CS	P3	ictrace2	0.50375	0.00263836	200
PKCd	FC	late	US	F-CS	P1	ictrace5	0.503333	0.00310913	200
PKCd	FC	late	US	F-CS	P3	ictrace9	0.503333	0.00332499	200
PKCd	FC	late	US	F-CS	P4	ictrace5	0.503125	0.00241051	200
PKCd	FC	late	US	F-CS	P1	ictrace16	0.5025	0.00381472	200
PKCd	FC	late	US	F-CS	P1	ictrace13	0.501667	0.00353357	200
PKCd	FC	late	US	F-CS	P2	ictrace8	0.500833	0.00381836	200
PKCd	FC	late	US	F-CS	P1	ictrace10	0.5	0	200
PKCd	FC	late	US	F-CS	P1	ictrace18	0.5	0	200
PKCd	FC	late	US	F-CS	P1	ictrace3	0.5	0	200
PKCd	FC	late	US	F-CS	P1	ictrace4	0.5	0	200
PKCd	FC	late	US	F-CS	P1	ictrace8	0.5	0	200
PKCd	FC	late	US	F-CS	P1	ictrace9	0.5	0	200
PKCd	FC	late	US	F-CS	P2	ictrace1	0.5	0	200
PKCd	FC	late	US	F-CS	P2	ictrace14	0.5	0	200
PKCd	FC	late	US	F-CS	P2	ictrace5	0.5	0.00372678	200
PKCd	FC	late	US	F-CS	P3	ictrace6	0.5	0	200
PKCd	FC	late	US	F-CS	P4	ictrace10	0.5	0	200
PKCd	FC	late	US	F-CS	P3	ictrace13	0.49875	0.00318566	200
PKCd	FC	late	US	F-CS	P4	ictrace2	0.498333	0.0101373	200
PKCd	FC	late	US	F-CS	P2	ictrace6	0.49625	0.00879053	200
PKCd	FC	late	US	F-CS	P2	ictrace12	0.495	0.00291011	200
PKCd	FC	late	US	F-CS	P3	ictrace1	0.49375	0.00246063	200
PKCd	FC	late	US	F-CS	P1	ictrace12	0.467917	0.00637861	200
PKCd	FC	late	US	F-CS	P4	ictrace4	0.467708	0.00634947	200
PKCd	FC	late	US	F-CS	P4	ictrace11	0.465417	0.00631982	200
PKCd	FC	late	US	F-CS	P1	ictrace14	0.461667	0.0064237	200
PKCd	FC	late	US	F-CS	P1	ictrace7	0.433333	0.0057735	200
PKCd	FC	late	US	F-CS	P2	ictrace7	0.433333	0.0057735	200
PKCd	recall	PBS	CS	F-CS	P2	ictrace2	0.597875	0.00410327	200
PKCd	recall	PBS	CS	F-CS	P3	ictrace5	0.565	0.00380789	200
PKCd	recall	PBS	CS	F-CS	P2	ictrace8t2	0.56131	0.00332668	200
PKCd	recall	PBS	CS	F-CS	P1	ictrace3	0.56	0.00565685	200
PKCd	recall	PBS	CS	F-CS	P5	ictrace8t2	0.547619	0.00276642	200
PKCd	recall	PBS	CS	F-CS	P1	ictrace20t2	0.545952	0.00373442	200
PKCd	recall	PBS	CS	F-CS	P2	ictrace6t2	0.545238	0.00262985	200
PKCd	recall	PBS	CS	F-CS	P3	ictrace5t2	0.545238	0.00413765	200
PKCd	recall	PBS	CS	F-CS	P5	ictrace4	0.544125	0.00473345	200
PKCd	recall	PBS	CS	F-CS	P1	ictrace12	0.54	0.0034641	200
PKCd	recall	PBS	CS	F-CS	P1	ictrace9	0.54	0.0034641	200
PKCd	recall	PBS	CS	F-CS	P2	ictrace1	0.54	0.0034641	200
PKCd	recall	PBS	CS	F-CS	P2	ictrace6	0.54	0.0034641	200
PKCd	recall	PBS	CS	F-CS	P1	ictrace14t2	0.530952	0.00269374	200
PKCd	recall	PBS	CS	F-CS	P2	ictrace2t2	0.530952	0.00269374	200
PKCd	recall	PBS	CS	F-CS	P1	ictrace11t2	0.530952	0.00269374	200
PKCd	recall	PBS	CS	F-CS	P1	ictrace23t2	0.530952	0.00269374	200
PKCd	recall	PBS	CS	F-CS	P1	ictrace3t2	0.530952	0.00269374	200
PKCd	recall	PBS	CS	F-CS	P3	ictrace2t2	0.530774	0.00501294	200
PKCd	recall	PBS	CS	F-CS	P4	ictrace12	0.5245	0.00335392	200
PKCd	recall	PBS	CS	F-CS	P3	ictrace9	0.5235	0.00323863	200
PKCd	recall	PBS	CS	F-CS	P1	ictrace25t2	0.523214	0.002518	200
PKCd	recall	PBS	CS	F-CS	P1	ictrace17t2	0.523036	0.00282857	200
PKCd	recall	PBS	CS	F-CS	P1	ictrace6t2	0.517857	0.00256298	200
PKCd	recall	PBS	CS	F-CS	P1	ictrace19t2	0.515833	0.00286347	200
PKCd	recall	PBS	CS	F-CS	P1	ictrace11	0.51475	0.00311343	200
PKCd	recall	PBS	CS	F-CS	P3	ictrace2	0.5105	0.00363301	200
PKCd	recall	PBS	CS	F-CS	P1	ictrace1t2	0.50869	0.00456413	200
PKCd	recall	PBS	CS	F-CS	P1	ictrace2t2	0.505417	0.0018687	200
PKCd	recall	PBS	CS	F-CS	P1	ictrace2	0.5045	0.00226909	200
PKCd	recall	PBS	CS	F-CS	P4	ictrace6	0.5045	0.00686649	200
PKCd	recall	PBS	CS	F-CS	P1	ictrace13t2	0.503631	0.00419227	200
PKCd	recall	PBS	CS	F-CS	P1	ictrace4t2	0.503214	0.00154007	200
PKCd	recall	PBS	CS	F-CS	P3	ictrace14	0.5025	0.00292617	200
PKCd	recall	PBS	CS	F-CS	P1	ictrace5t2	0.502143	0.00122787	200
PKCd	recall	PBS	CS	F-CS	P1	ictrace10	0.502	0.00199499	200
PKCd	recall	PBS	CS	F-CS	P1	ictrace19	0.502	0.0021166	200
PKCd	recall	PBS	CS	F-CS	P1	ictrace18t2	0.501786	0.00155162	200
PKCd	recall	PBS	CS	F-CS	P3	ictrace10t2	0.501667	0.00155456	200
PKCd	recall	PBS	CS	F-CS	P1	ictrace17	0.5015	0.00193358	200
PKCd	recall	PBS	CS	F-CS	P3	ictrace21	0.5015	0.00217687	200
PKCd	recall	PBS	CS	F-CS	P1	ictrace12t2	0.50125	0.00161132	200
PKCd	recall	PBS	CS	F-CS	P3	ictrace6t2	0.50125	0.0013791	200
PKCd	recall	PBS	CS	F-CS	P1	ictrace21	0.500625	0.00286377	200
PKCd	recall	PBS	CS	F-CS	P1	ictrace7	0.5005	0.00206125	200
PKCd	recall	PBS	CS	F-CS	P1	ictrace13	0.5	0.00212132	200
PKCd	recall	PBS	CS	F-CS	P1	ictrace18	0.5	0	200
PKCd	recall	PBS	CS	F-CS	P1	ictrace4	0.5	0	200
PKCd	recall	PBS	CS	F-CS	P1	ictrace5	0.5	0	200
PKCd	recall	PBS	CS	F-CS	P1	ictrace8	0.5	0	200
PKCd	recall	PBS	CS	F-CS	P3	ictrace10	0.5	0	200
PKCd	recall	PBS	CS	F-CS	P3	ictrace12	0.5	0	200
PKCd	recall	PBS	CS	F-CS	P3	ictrace20	0.5	0	200
PKCd	recall	PBS	CS	F-CS	P3	ictrace7	0.5	0	200
PKCd	recall	PBS	CS	F-CS	P4	ictrace7	0.5	0	200
PKCd	recall	PBS	CS	F-CS	P5	ictrace2	0.5	0.002	200
PKCd	recall	PBS	CS	F-CS	P1	ictrace22t2	0.499643	0.00138298	200
PKCd	recall	PBS	CS	F-CS	P3	ictrace12t2	0.499643	0.00138298	200
PKCd	recall	PBS	CS	F-CS	P3	ictrace15t2	0.499583	0.00161347	200
PKCd	recall	PBS	CS	F-CS	P3	ictrace1	0.499375	0.00242021	200
PKCd	recall	PBS	CS	F-CS	P2	ictrace5t2	0.499167	0.00186246	200
PKCd	recall	PBS	CS	F-CS	P5	ictrace7t2	0.499107	0.00294741	200
PKCd	recall	PBS	CS	F-CS	P3	ictrace8	0.498875	0.00224512	200
PKCd	recall	PBS	CS	F-CS	P1	ictrace1	0.4985	0.00165492	200
PKCd	recall	PBS	CS	F-CS	P3	ictrace6	0.4985	0.00228883	200
PKCd	recall	PBS	CS	F-CS	P1	ictrace16t2	0.498333	0.00176383	200
PKCd	recall	PBS	CS	F-CS	P1	ictrace8t2	0.498214	0.00128149	200
PKCd	recall	PBS	CS	F-CS	P5	ictrace9	0.498	0.00186548	200
PKCd	recall	PBS	CS	F-CS	P2	ictrace1t2	0.497917	0.00171163	200
PKCd	recall	PBS	CS	F-CS	P1	ictrace24t2	0.497857	0.00132769	200
PKCd	recall	PBS	CS	F-CS	P1	ictrace15	0.497125	0.004744	200
PKCd	recall	PBS	CS	F-CS	P1	ictrace20	0.497	0.00233559	200
PKCd	recall	PBS	CS	F-CS	P3	ictrace15	0.496375	0.00484574	200
PKCd	recall	PBS	CS	F-CS	P2	ictrace4	0.49625	0.00572208	200
PKCd	recall	PBS	CS	F-CS	P3	ictrace17	0.49625	0.00263836	200
PKCd	recall	PBS	CS	F-CS	P3	ictrace4	0.495625	0.00476129	200
PKCd	recall	PBS	CS	F-CS	P1	ictrace10t2	0.494048	0.00151757	200
PKCd	recall	PBS	CS	F-CS	P1	ictrace15t2	0.493333	0.00349485	200
PKCd	recall	PBS	CS	F-CS	P4	ictrace3	0.492875	0.00667406	200
PKCd	recall	PBS	CS	F-CS	P3	ictrace13t2	0.491369	0.00251968	200
PKCd	recall	PBS	CS	F-CS	P3	ictrace4t2	0.487262	0.00241128	200
PKCd	recall	PBS	CS	F-CS	P3	ictrace3t2	0.484405	0.00428438	200
PKCd	recall	PBS	CS	F-CS	P1	ictrace21t2	0.482083	0.00321428	200
PKCd	recall	PBS	CS	F-CS	P1	ictrace9t2	0.480298	0.00303933	200
PKCd	recall	PBS	CS	F-CS	P3	ictrace7t2	0.479405	0.00295913	200
PKCd	recall	PBS	CS	F-CS	P5	ictrace6	0.4785	0.00373346	200
PKCd	recall	PBS	CS	F-CS	P5	ictrace6t2	0.477798	0.00300542	200
PKCd	recall	PBS	CS	F-CS	P2	ictrace4t2	0.477381	0.00314182	200
PKCd	recall	PBS	CS	F-CS	P1	ictrace26t2	0.477202	0.00436093	200
PKCd	recall	PBS	CS	F-CS	P5	ictrace14	0.476	0.00388844	200
PKCd	recall	PBS	CS	F-CS	P5	ictrace10t2	0.474464	0.00271522	200
PKCd	recall	PBS	CS	F-CS	P1	ictrace27t2	0.474107	0.00259108	200
PKCd	recall	PBS	CS	F-CS	P5	ictrace8	0.4705	0.0033762	200
PKCd	recall	PBS	CS	F-CS	P5	ictrace11	0.47	0.00353553	200
PKCd	recall	PBS	CS	F-CS	P5	ictrace1	0.4695	0.00340569	200
PKCd	recall	PBS	CS	F-CS	P2	ictrace5	0.469375	0.00374348	200
PKCd	recall	PBS	CS	F-CS	P3	ictrace16	0.469	0.00350999	200
PKCd	recall	PBS	CS	F-CS	P5	ictrace5	0.4685	0.00350553	200
PKCd	recall	PBS	CS	F-CS	P3	ictrace11	0.466	0.00342345	200
PKCd	recall	PBS	CS	F-CS	P1	ictrace16	0.466	0.00334963	200
PKCd	recall	PBS	CS	F-CS	P1	ictrace14	0.464	0.00339411	200
PKCd	recall	PBS	CS	F-CS	P2	ictrace7t2	0.463333	0.00380241	200
PKCd	recall	PBS	CS	F-CS	P3	ictrace18	0.46125	0.00401073	200
PKCd	recall	PBS	CS	F-CS	P1	ictrace7t2	0.449643	0.00498418	200
PKCd	recall	PBS	CS	R-CS	P4	ictrace3	0.57869	0.00565432	200
PKCd	recall	PBS	CS	R-CS	P2	ictrace4	0.558869	0.00407049	200
PKCd	recall	PBS	CS	R-CS	P3	ictrace5t2	0.554226	0.00569235	200
PKCd	recall	PBS	CS	R-CS	P3	ictrace4	0.55244	0.00401166	200
PKCd	recall	PBS	CS	R-CS	P3	ictrace10t2	0.537083	0.00352065	200
PKCd	recall	PBS	CS	R-CS	P3	ictrace6	0.53506	0.00267287	200
PKCd	recall	PBS	CS	R-CS	P1	ictrace24t2	0.534524	0.00282973	200
PKCd	recall	PBS	CS	R-CS	P3	ictrace12	0.533571	0.00404653	200
PKCd	recall	PBS	CS	R-CS	P3	ictrace3t2	0.533274	0.00329839	200
PKCd	recall	PBS	CS	R-CS	P1	ictrace9t2	0.530952	0.00269374	200
PKCd	recall	PBS	CS	R-CS	P1	ictrace3	0.530298	0.00379816	200
PKCd	recall	PBS	CS	R-CS	P5	ictrace3	0.526548	0.0041545	200
PKCd	recall	PBS	CS	R-CS	P5	ictrace8t2	0.5225	0.00292914	200
PKCd	recall	PBS	CS	R-CS	P1	ictrace1	0.52244	0.00256184	200
PKCd	recall	PBS	CS	R-CS	P5	ictrace9	0.521845	0.00254603	200
PKCd	recall	PBS	CS	R-CS	P2	ictrace2	0.521726	0.00424871	200
PKCd	recall	PBS	CS	R-CS	P3	ictrace5	0.521607	0.00399216	200
PKCd	recall	PBS	CS	R-CS	P3	ictrace16	0.52	0.00486769	200
PKCd	recall	PBS	CS	R-CS	P1	ictrace13	0.519583	0.00269886	200
PKCd	recall	PBS	CS	R-CS	P1	ictrace8	0.519226	0.00262402	200
PKCd	recall	PBS	CS	R-CS	P1	ictrace12t2	0.518929	0.00264756	200
PKCd	recall	PBS	CS	R-CS	P3	ictrace1t2	0.518929	0.00273186	200
PKCd	recall	PBS	CS	R-CS	P5	ictrace1	0.517143	0.00247098	200
PKCd	recall	PBS	CS	R-CS	P4	ictrace12	0.516607	0.00251399	200
PKCd	recall	PBS	CS	R-CS	P2	ictrace1	0.514286	0.0024281	200
PKCd	recall	PBS	CS	R-CS	P1	ictrace27t2	0.514167	0.0032334	200
PKCd	recall	PBS	CS	R-CS	P3	ictrace13t2	0.514107	0.00424341	200
PKCd	recall	PBS	CS	R-CS	P1	ictrace11	0.513929	0.00256037	200
PKCd	recall	PBS	CS	R-CS	P1	ictrace18t2	0.511786	0.00410411	200
PKCd	recall	PBS	CS	R-CS	P3	ictrace3	0.51125	0.00254661	200
PKCd	recall	PBS	CS	R-CS	P3	ictrace7t2	0.50869	0.00194108	200
PKCd	recall	PBS	CS	R-CS	P2	ictrace8t2	0.5075	0.0027125	200
PKCd	recall	PBS	CS	R-CS	P3	ictrace18	0.507024	0.00326914	200
PKCd	recall	PBS	CS	R-CS	P4	ictrace6	0.505476	0.00416993	200
PKCd	recall	PBS	CS	R-CS	P3	ictrace2	0.505417	0.00156763	200
PKCd	recall	PBS	CS	R-CS	P3	ictrace12t2	0.504524	0.00393718	200
PKCd	recall	PBS	CS	R-CS	P2	ictrace3	0.502143	0.00142051	200
PKCd	recall	PBS	CS	R-CS	P2	ictrace1t2	0.501905	0.00327807	200
PKCd	recall	PBS	CS	R-CS	P3	ictrace9	0.501429	0.0016721	200
PKCd	recall	PBS	CS	R-CS	P1	ictrace17t2	0.501429	0.0016721	200
PKCd	recall	PBS	CS	R-CS	P1	ictrace7	0.50125	0.00308882	200
PKCd	recall	PBS	CS	R-CS	P1	ictrace16t2	0.50125	0.00181406	200
PKCd	recall	PBS	CS	R-CS	P1	ictrace19t2	0.50125	0.00161132	200
PKCd	recall	PBS	CS	R-CS	P3	ictrace10	0.501071	0.00147059	200
PKCd	recall	PBS	CS	R-CS	P1	ictrace5	0.500833	0.00176678	200
PKCd	recall	PBS	CS	R-CS	P5	ictrace4	0.500714	0.00167439	200
PKCd	recall	PBS	CS	R-CS	P1	ictrace12	0.500417	0.00171771	200
PKCd	recall	PBS	CS	R-CS	P5	ictrace18	0.500417	0.0028638	200
PKCd	recall	PBS	CS	R-CS	P3	ictrace6t2	0.500357	0.000356249	200
PKCd	recall	PBS	CS	R-CS	P1	ictrace14	0.5	0	200
PKCd	recall	PBS	CS	R-CS	P1	ictrace17	0.5	0.00176777	200
PKCd	recall	PBS	CS	R-CS	P1	ictrace2	0.5	0.00144338	200
PKCd	recall	PBS	CS	R-CS	P1	ictrace9	0.5	0.00186339	200
PKCd	recall	PBS	CS	R-CS	P3	ictrace19	0.5	0	200
PKCd	recall	PBS	CS	R-CS	P1	ictrace11t2	0.5	0.000589256	200
PKCd	recall	PBS	CS	R-CS	P1	ictrace15t2	0.5	0	200
PKCd	recall	PBS	CS	R-CS	P1	ictrace22t2	0.5	0	200
PKCd	recall	PBS	CS	R-CS	P1	ictrace23t2	0.5	0	200
PKCd	recall	PBS	CS	R-CS	P1	ictrace4t2	0.5	0	200
PKCd	recall	PBS	CS	R-CS	P1	ictrace6t2	0.5	0	200
PKCd	recall	PBS	CS	R-CS	P2	ictrace5t2	0.5	0	200
PKCd	recall	PBS	CS	R-CS	P2	ictrace7t2	0.5	0	200
PKCd	recall	PBS	CS	R-CS	P2	ictrace4t2	0.499643	0.00118424	200
PKCd	recall	PBS	CS	R-CS	P5	ictrace8	0.499643	0.00163644	200
PKCd	recall	PBS	CS	R-CS	P1	ictrace15	0.499464	0.00396296	200
PKCd	recall	PBS	CS	R-CS	P1	ictrace1t2	0.499286	0.00151439	200
PKCd	recall	PBS	CS	R-CS	P1	ictrace5t2	0.499286	0.00159639	200
PKCd	recall	PBS	CS	R-CS	P5	ictrace2	0.499167	0.00186246	200
PKCd	recall	PBS	CS	R-CS	P5	ictrace10t2	0.499167	0.00166562	200
PKCd	recall	PBS	CS	R-CS	P1	ictrace6	0.497917	0.00171163	200
PKCd	recall	PBS	CS	R-CS	P1	ictrace20	0.4975	0.00116518	200
PKCd	recall	PBS	CS	R-CS	P5	ictrace11	0.4975	0.00165727	200
PKCd	recall	PBS	CS	R-CS	P3	ictrace15t2	0.497202	0.0017374	200
PKCd	recall	PBS	CS	R-CS	P1	ictrace21t2	0.496369	0.00278199	200
PKCd	recall	PBS	CS	R-CS	P3	ictrace17	0.494702	0.00321175	200
PKCd	recall	PBS	CS	R-CS	P2	ictrace3t2	0.494524	0.00320307	200
PKCd	recall	PBS	CS	R-CS	P5	ictrace8	0.494226	0.00196334	200
PKCd	recall	PBS	CS	R-CS	P1	ictrace18	0.493929	0.00157932	200
PKCd	recall	PBS	CS	R-CS	P1	ictrace7t2	0.493512	0.00191552	200
PKCd	recall	PBS	CS	R-CS	P4	ictrace7	0.493214	0.00331148	200
PKCd	recall	PBS	CS	R-CS	P2	ictrace6	0.492679	0.00330952	200
PKCd	recall	PBS	CS	R-CS	P3	ictrace15	0.492202	0.00417737	200
PKCd	recall	PBS	CS	R-CS	P3	ictrace4t2	0.491905	0.00332136	200
PKCd	recall	PBS	CS	R-CS	P5	ictrace6t2	0.488929	0.00482291	200
PKCd	recall	PBS	CS	R-CS	P2	ictrace6t2	0.488214	0.00335134	200
PKCd	recall	PBS	CS	R-CS	P5	ictrace6	0.483333	0.00322749	200
PKCd	recall	PBS	CS	R-CS	P5	ictrace5	0.482619	0.00294488	200
PKCd	recall	PBS	CS	R-CS	P5	ictrace14	0.478869	0.00253998	200
PKCd	recall	PBS	CS	R-CS	P1	ictrace3t2	0.478452	0.00328018	200
PKCd	recall	PBS	CS	R-CS	P3	ictrace20	0.477857	0.00303634	200
PKCd	recall	PBS	CS	R-CS	P1	ictrace16	0.47756	0.00262874	200
PKCd	recall	PBS	CS	R-CS	P3	ictrace2t2	0.4775	0.00432914	200
PKCd	recall	PBS	CS	R-CS	P1	ictrace26t2	0.476667	0.00277389	200
PKCd	recall	PBS	CS	R-CS	P3	ictrace21	0.476012	0.00273871	200
PKCd	recall	PBS	CS	R-CS	P3	ictrace8	0.475298	0.0045798	200
PKCd	recall	PBS	CS	R-CS	P1	ictrace13t2	0.474702	0.00294981	200
PKCd	recall	PBS	CS	R-CS	P1	ictrace2t2	0.47375	0.00259772	200
PKCd	recall	PBS	CS	R-CS	P3	ictrace1	0.472917	0.00294259	200
PKCd	recall	PBS	CS	R-CS	P1	ictrace10t2	0.47256	0.00275641	200
PKCd	recall	PBS	CS	R-CS	P3	ictrace23	0.4725	0.00263307	200
PKCd	recall	PBS	CS	R-CS	P1	ictrace10	0.469583	0.00289741	200
PKCd	recall	PBS	CS	R-CS	P3	ictrace7	0.469524	0.00343142	200
PKCd	recall	PBS	CS	R-CS	P1	ictrace14t2	0.464881	0.00390573	200
PKCd	recall	PBS	CS	R-CS	P1	ictrace21	0.463512	0.00349935	200
PKCd	recall	PBS	CS	R-CS	P5	ictrace4	0.463512	0.00420651	200
PKCd	recall	PBS	CS	R-CS	P1	ictrace4	0.460536	0.00403849	200
PKCd	recall	PBS	CS	R-CS	P2	ictrace2t2	0.460298	0.00346905	200
PKCd	recall	PBS	CS	R-CS	P5	ictrace7	0.459167	0.0040393	200
PKCd	recall	PBS	CS	R-CS	P5	ictrace7t2	0.454167	0.00477806	200
PKCd	recall	PBS	CS	R-CS	P1	ictrace8t2	0.452202	0.00443241	200
PKCd	recall	PBS	CS	R-CS	P2	ictrace5	0.426667	0.00461948	200
PKCd	recall	PBS	CS discrimination	-	P1	ictrace12	0.727806	0.0158742	200
PKCd	recall	PBS	CS discrimination	-	P2	ictrace9	0.687701	0.0158139	200
PKCd	recall	PBS	CS discrimination	-	P2	ictrace14	0.669385	0.0135136	200
PKCd	recall	PBS	CS discrimination	-	P3	ictrace1	0.654612	0.0140066	200
PKCd	recall	PBS	CS discrimination	-	P2	ictrace5	0.649782	0.011923	200
PKCd	recall	PBS	CS discrimination	-	P3	ictrace16	0.646095	0.00849217	200
PKCd	recall	PBS	CS discrimination	-	P2	ictrace8	0.642552	0.0125116	200
PKCd	recall	PBS	CS discrimination	-	P3	ictrace11	0.637649	0.0109374	200
PKCd	recall	PBS	CS discrimination	-	P5	ictrace10	0.628936	0.00675895	200
PKCd	recall	PBS	CS discrimination	-	P5	ictrace1	0.627832	0.0060169	200
PKCd	recall	PBS	CS discrimination	-	P3	ictrace5	0.626347	0.00787209	200
PKCd	recall	PBS	CS discrimination	-	P3	ictrace17	0.62502	0.00620486	200
PKCd	recall	PBS	CS discrimination	-	P3	ictrace20	0.623313	0.00680699	200
PKCd	recall	PBS	CS discrimination	-	P3	ictrace6	0.622409	0.00601467	200
PKCd	recall	PBS	CS discrimination	-	P2	ictrace18	0.621822	0.00846886	200
PKCd	recall	PBS	CS discrimination	-	P5	ictrace21	0.621676	0.0065078	200
PKCd	recall	PBS	CS discrimination	-	P3	ictrace9	0.621253	0.00575669	200
PKCd	recall	PBS	CS discrimination	-	P3	ictrace12	0.621113	0.00607386	200
PKCd	recall	PBS	CS discrimination	-	P2	ictrace1	0.619758	0.015674	200
PKCd	recall	PBS	CS discrimination	-	P4	ictrace6	0.618716	0.00661815	200
PKCd	recall	PBS	CS discrimination	-	P4	ictrace5	0.618421	0.00829265	200
PKCd	recall	PBS	CS discrimination	-	P5	ictrace19	0.616888	0.00587187	200
PKCd	recall	PBS	CS discrimination	-	P3	ictrace10	0.615636	0.00629717	200
PKCd	recall	PBS	CS discrimination	-	P2	ictrace2	0.615289	0.00961178	200
PKCd	recall	PBS	CS discrimination	-	P4	ictrace3	0.61472	0.0106386	200
PKCd	recall	PBS	CS discrimination	-	P5	ictrace12	0.614476	0.00702396	200
PKCd	recall	PBS	CS discrimination	-	P5	ictrace11	0.612823	0.00734533	200
PKCd	recall	PBS	CS discrimination	-	P3	ictrace2	0.612658	0.0108879	200
PKCd	recall	PBS	CS discrimination	-	P5	ictrace4	0.612574	0.00701808	200
PKCd	recall	PBS	CS discrimination	-	P5	ictrace14	0.611539	0.00636837	200
PKCd	recall	PBS	CS discrimination	-	P5	ictrace16	0.610409	0.0201778	200
PKCd	recall	PBS	CS discrimination	-	P5	ictrace15	0.609916	0.0115154	200
PKCd	recall	PBS	CS discrimination	-	P2	ictrace11	0.609709	0.00732649	200
PKCd	recall	PBS	CS discrimination	-	P1	ictrace7	0.60933	0.00668042	200
PKCd	recall	PBS	CS discrimination	-	P3	ictrace19	0.608128	0.00557997	200
PKCd	recall	PBS	CS discrimination	-	P3	ictrace18	0.607461	0.00877033	200
PKCd	recall	PBS	CS discrimination	-	P5	ictrace17	0.606714	0.00645175	200
PKCd	recall	PBS	CS discrimination	-	P5	ictrace23	0.605106	0.0104367	200
PKCd	recall	PBS	CS discrimination	-	P3	ictrace4	0.604052	0.00724819	200
PKCd	recall	PBS	CS discrimination	-	P5	ictrace3	0.601642	0.00824547	200
PKCd	recall	PBS	CS discrimination	-	P3	ictrace14	0.601494	0.0102723	200
PKCd	recall	PBS	CS discrimination	-	P2	ictrace4	0.59857	0.0206431	200
PKCd	recall	PBS	CS discrimination	-	P2	ictrace6	0.591837	0.018607	200
PKCd	recall	PBS	CS discrimination	-	P3	ictrace13	0.582517	0.0124628	200
PKCd	recall	PBS	CS discrimination	-	P3	ictrace8	0.581537	0.0125011	200
PKCd	recall	PBS	CS discrimination	-	P3	ictrace15	0.580702	0.0133893	200
PKCd	recall	PBS	CS discrimination	-	P4	ictrace1	0.579088	0.00820995	200
PKCd	recall	PBS	CS discrimination	-	P3	ictrace21	0.573456	0.0127505	200
PKCd	recall	PBS	CS discrimination	-	P5	ictrace2	0.570482	0.0196681	200
PKCd	recall	PBS	CS discrimination	-	P2	ictrace7	0.560298	0.0136292	200
PKCd	recall	PBS	CS discrimination	-	P5	ictrace18	0.559323	0.0200783	200
PKCd	recall	PBS	CS discrimination	-	P1	ictrace6	0.558021	0.0116791	200
PKCd	recall	PBS	CS discrimination	-	P3	ictrace7	0.535589	0.0157362	200
PKCd	recall	PBS	CS discrimination	-	P3	ictrace3	0.523151	0.0136825	200
PKCd	recall	PBS	CS discrimination	-	P5	ictrace20	0.521425	0.015155	200
PKCd	recall	PBS	CS discrimination	-	P5	ictrace9	0.517145	0.0165343	200
PKCd	recall	PBS	CS discrimination	-	P1	ictrace3	0.515701	0.0119748	200
PKCd	recall	PBS	CS discrimination	-	P5	ictrace8	0.501778	0.0194999	200
PKCd	recall	PBS	CS discrimination	-	P5	ictrace7	0.501554	0.0178813	200
PKCd	recall	PBS	CS discrimination	-	P5	ictrace5	0.488673	0.0148156	200
PKCd	recall	PBS	CS discrimination	-	P5	ictrace6	0.486944	0.0174329	200
PKCd	recall	PBS	CS discrimination	-	P4	ictrace2	0.45365	0.022831	200
PKCd	recall	PBS	CS discrimination	-	P2	ictrace3	0.399585	0.0173826	200
PKCd	recall	PBS	CS discrimination	-	P4	ictrace4	0.370999	0.0171866	200
PKCd	recall	aIC inhibition	CS	F-CS	P3	ictrace8t2	0.592857	0.00413765	200
PKCd	recall	aIC inhibition	CS	F-CS	P3	ictrace18	0.564286	0.00437733	200
PKCd	recall	aIC inhibition	CS	F-CS	P1	ictrace12t2	0.561905	0.00538748	200
PKCd	recall	aIC inhibition	CS	F-CS	P2	ictrace3	0.558869	0.00353573	200
PKCd	recall	aIC inhibition	CS	F-CS	P1	ictrace16	0.55	0.00288675	200
PKCd	recall	aIC inhibition	CS	F-CS	P1	ictrace4	0.547619	0.00464133	200
PKCd	recall	aIC inhibition	CS	F-CS	P1	ictrace14t2	0.547619	0.00276642	200
PKCd	recall	aIC inhibition	CS	F-CS	P2	ictrace7t2	0.546726	0.00273672	200
PKCd	recall	aIC inhibition	CS	F-CS	P2	ictrace6	0.537262	0.00396833	200
PKCd	recall	aIC inhibition	CS	F-CS	P1	ictrace11t2	0.537262	0.00396833	200
PKCd	recall	aIC inhibition	CS	F-CS	P3	ictrace10t2	0.537262	0.00297656	200
PKCd	recall	aIC inhibition	CS	F-CS	P2	ictrace4	0.536071	0.00575808	200
PKCd	recall	aIC inhibition	CS	F-CS	P1	ictrace17	0.534286	0.00274915	200
PKCd	recall	aIC inhibition	CS	F-CS	P1	ictrace4t2	0.533333	0.00288675	200
PKCd	recall	aIC inhibition	CS	F-CS	P3	ictrace8	0.53244	0.00281081	200
PKCd	recall	aIC inhibition	CS	F-CS	P1	ictrace6	0.530952	0.00269374	200
PKCd	recall	aIC inhibition	CS	F-CS	P3	ictrace4	0.530952	0.00269374	200
PKCd	recall	aIC inhibition	CS	F-CS	P1	ictrace11	0.530952	0.00269374	200
PKCd	recall	aIC inhibition	CS	F-CS	P1	ictrace13t2	0.530952	0.00269374	200
PKCd	recall	aIC inhibition	CS	F-CS	P2	ictrace6t2	0.530952	0.00269374	200
PKCd	recall	aIC inhibition	CS	F-CS	P3	ictrace15t2	0.530952	0.00269374	200
PKCd	recall	aIC inhibition	CS	F-CS	P2	ictrace4t2	0.530595	0.00302637	200
PKCd	recall	aIC inhibition	CS	F-CS	P2	ictrace9	0.528214	0.0039585	200
PKCd	recall	aIC inhibition	CS	F-CS	P3	ictrace22t2	0.523333	0.00277389	200
PKCd	recall	aIC inhibition	CS	F-CS	P3	ictrace3t2	0.519048	0.00279572	200
PKCd	recall	aIC inhibition	CS	F-CS	P3	ictrace1t2	0.513155	0.00396752	200
PKCd	recall	aIC inhibition	CS	F-CS	P1	ictrace2t2	0.511905	0.00431537	200
PKCd	recall	aIC inhibition	CS	F-CS	P3	ictrace12	0.504167	0.00261871	200
PKCd	recall	aIC inhibition	CS	F-CS	P1	ictrace19	0.503214	0.00145489	200
PKCd	recall	aIC inhibition	CS	F-CS	P1	ictrace9	0.502143	0.00158999	200
PKCd	recall	aIC inhibition	CS	F-CS	P1	ictrace17t2	0.502143	0.00142051	200
PKCd	recall	aIC inhibition	CS	F-CS	P1	ictrace3t2	0.502083	0.00345488	200
PKCd	recall	aIC inhibition	CS	F-CS	P1	ictrace9t2	0.502083	0.00190372	200
PKCd	recall	aIC inhibition	CS	F-CS	P3	ictrace17t2	0.501667	0.00176383	200
PKCd	recall	aIC inhibition	CS	F-CS	P3	ictrace4t2	0.501667	0.00374105	200
PKCd	recall	aIC inhibition	CS	F-CS	P3	ictrace18t2	0.50125	0.00190736	200
PKCd	recall	aIC inhibition	CS	F-CS	P1	ictrace8t2	0.501012	0.00210747	200
PKCd	recall	aIC inhibition	CS	F-CS	P3	ictrace7	0.500417	0.00181597	200
PKCd	recall	aIC inhibition	CS	F-CS	P1	ictrace16t2	0.500417	0.00190918	200
PKCd	recall	aIC inhibition	CS	F-CS	P1	ictrace1	0.500357	0.00147232	200
PKCd	recall	aIC inhibition	CS	F-CS	P3	ictrace16	0.500357	0.00147232	200
PKCd	recall	aIC inhibition	CS	F-CS	P3	ictrace10	0.5	0	200
PKCd	recall	aIC inhibition	CS	F-CS	P3	ictrace11	0.5	0	200
PKCd	recall	aIC inhibition	CS	F-CS	P3	ictrace5	0.5	0	200
PKCd	recall	aIC inhibition	CS	F-CS	P1	ictrace5t2	0.499583	0.00171771	200
PKCd	recall	aIC inhibition	CS	F-CS	P1	ictrace3	0.499167	0.0013163	200
PKCd	recall	aIC inhibition	CS	F-CS	P1	ictrace20	0.498929	0.00155491	200
PKCd	recall	aIC inhibition	CS	F-CS	P2	ictrace1t2	0.498929	0.00138113	200
PKCd	recall	aIC inhibition	CS	F-CS	P1	ictrace7	0.49875	0.00181406	200
PKCd	recall	aIC inhibition	CS	F-CS	P2	ictrace7	0.498571	0.00133248	200
PKCd	recall	aIC inhibition	CS	F-CS	P3	ictrace16t2	0.498571	0.00188712	200
PKCd	recall	aIC inhibition	CS	F-CS	P3	ictrace9	0.497917	0.00181022	200
PKCd	recall	aIC inhibition	CS	F-CS	P3	ictrace11t2	0.497857	0.00158999	200
PKCd	recall	aIC inhibition	CS	F-CS	P3	ictrace21	0.497143	0.0015017	200
PKCd	recall	aIC inhibition	CS	F-CS	P1	ictrace19t2	0.496667	0.00164992	200
PKCd	recall	aIC inhibition	CS	F-CS	P3	ictrace6	0.49631	0.00192215	200
PKCd	recall	aIC inhibition	CS	F-CS	P3	ictrace17	0.49625	0.00147873	200
PKCd	recall	aIC inhibition	CS	F-CS	P3	ictrace12t2	0.496012	0.00360626	200
PKCd	recall	aIC inhibition	CS	F-CS	P1	ictrace10	0.495714	0.00156818	200
PKCd	recall	aIC inhibition	CS	F-CS	P1	ictrace12	0.49506	0.00346598	200
PKCd	recall	aIC inhibition	CS	F-CS	P1	ictrace13	0.49375	0.00203592	200
PKCd	recall	aIC inhibition	CS	F-CS	P1	ictrace7t2	0.492679	0.00190044	200
PKCd	recall	aIC inhibition	CS	F-CS	P2	ictrace5	0.492381	0.00326573	200
PKCd	recall	aIC inhibition	CS	F-CS	P3	ictrace2	0.492143	0.00333274	200
PKCd	recall	aIC inhibition	CS	F-CS	P3	ictrace20t2	0.491429	0.00329609	200
PKCd	recall	aIC inhibition	CS	F-CS	P1	ictrace6t2	0.48881	0.00325007	200
PKCd	recall	aIC inhibition	CS	F-CS	P2	ictrace8	0.485119	0.00320849	200
PKCd	recall	aIC inhibition	CS	F-CS	P3	ictrace2t2	0.483393	0.00278034	200
PKCd	recall	aIC inhibition	CS	F-CS	P1	ictrace2	0.478095	0.00337394	200
PKCd	recall	aIC inhibition	CS	F-CS	P2	ictrace2t2	0.476071	0.0027329	200
PKCd	recall	aIC inhibition	CS	F-CS	P1	ictrace10t2	0.475833	0.00298084	200
PKCd	recall	aIC inhibition	CS	F-CS	P3	ictrace24	0.475595	0.00261736	200
PKCd	recall	aIC inhibition	CS	F-CS	P2	ictrace5t2	0.475179	0.00266701	200
PKCd	recall	aIC inhibition	CS	F-CS	P3	ictrace20	0.472917	0.00288299	200
PKCd	recall	aIC inhibition	CS	F-CS	P3	ictrace7t2	0.4725	0.00277076	200
PKCd	recall	aIC inhibition	CS	F-CS	P1	ictrace18	0.470357	0.00324936	200
PKCd	recall	aIC inhibition	CS	F-CS	P1	ictrace15	0.461964	0.00410645	200
PKCd	recall	aIC inhibition	CS	F-CS	P3	ictrace19	0.461548	0.00410819	200
PKCd	recall	aIC inhibition	CS	F-CS	P1	ictrace14	0.46	0.0048577	200
PKCd	recall	aIC inhibition	CS	R-CS	P3	ictrace5	0.578571	0.00374953	200
PKCd	recall	aIC inhibition	CS	R-CS	P1	ictrace19	0.553512	0.0034871	200
PKCd	recall	aIC inhibition	CS	R-CS	P2	ictrace9	0.548393	0.00531003	200
PKCd	recall	aIC inhibition	CS	R-CS	P1	ictrace9	0.547619	0.00276642	200
PKCd	recall	aIC inhibition	CS	R-CS	P2	ictrace1	0.547619	0.00464133	200
PKCd	recall	aIC inhibition	CS	R-CS	P1	ictrace9t2	0.547619	0.00276642	200
PKCd	recall	aIC inhibition	CS	R-CS	P1	ictrace13t2	0.537619	0.00288852	200
PKCd	recall	aIC inhibition	CS	R-CS	P1	ictrace20	0.537202	0.00280702	200
PKCd	recall	aIC inhibition	CS	R-CS	P2	ictrace7	0.53494	0.00287824	200
PKCd	recall	aIC inhibition	CS	R-CS	P1	ictrace1t2	0.533333	0.00288675	200
PKCd	recall	aIC inhibition	CS	R-CS	P1	ictrace7	0.530952	0.00269374	200
PKCd	recall	aIC inhibition	CS	R-CS	P3	ictrace18t2	0.523333	0.00469811	200
PKCd	recall	aIC inhibition	CS	R-CS	P2	ictrace2t2	0.520833	0.00274811	200
PKCd	recall	aIC inhibition	CS	R-CS	P3	ictrace24	0.519881	0.00267541	200
PKCd	recall	aIC inhibition	CS	R-CS	P2	ictrace2	0.518155	0.0025267	200
PKCd	recall	aIC inhibition	CS	R-CS	P3	ictrace20t2	0.517917	0.00572234	200
PKCd	recall	aIC inhibition	CS	R-CS	P1	ictrace13	0.516786	0.0024732	200
PKCd	recall	aIC inhibition	CS	R-CS	P3	ictrace6t2	0.51631	0.00535801	200
PKCd	recall	aIC inhibition	CS	R-CS	P2	ictrace6	0.514286	0.00316093	200
PKCd	recall	aIC inhibition	CS	R-CS	P1	ictrace6t2	0.514286	0.00258501	200
PKCd	recall	aIC inhibition	CS	R-CS	P3	ictrace14	0.510714	0.00224461	200
PKCd	recall	aIC inhibition	CS	R-CS	P1	ictrace6	0.509643	0.0029226	200
PKCd	recall	aIC inhibition	CS	R-CS	P3	ictrace11	0.509524	0.00350028	200
PKCd	recall	aIC inhibition	CS	R-CS	P2	ictrace8	0.508631	0.00399115	200
PKCd	recall	aIC inhibition	CS	R-CS	P3	ictrace16	0.508571	0.00288203	200
PKCd	recall	aIC inhibition	CS	R-CS	P3	ictrace7	0.507024	0.0022227	200
PKCd	recall	aIC inhibition	CS	R-CS	P3	ictrace9	0.506429	0.00176343	200
PKCd	recall	aIC inhibition	CS	R-CS	P3	ictrace16t2	0.505238	0.00383884	200
PKCd	recall	aIC inhibition	CS	R-CS	P3	ictrace5t2	0.503214	0.00221875	200
PKCd	recall	aIC inhibition	CS	R-CS	P1	ictrace14	0.502083	0.00137405	200
PKCd	recall	aIC inhibition	CS	R-CS	P1	ictrace11	0.501667	0.00166249	200
PKCd	recall	aIC inhibition	CS	R-CS	P2	ictrace6t2	0.501071	0.00163488	200
PKCd	recall	aIC inhibition	CS	R-CS	P3	ictrace12t2	0.500595	0.00145985	200
PKCd	recall	aIC inhibition	CS	R-CS	P1	ictrace10	0.500417	0.00150202	200
PKCd	recall	aIC inhibition	CS	R-CS	P2	ictrace3	0.500417	0.00171771	200
PKCd	recall	aIC inhibition	CS	R-CS	P1	ictrace1	0.500357	0.00128745	200
PKCd	recall	aIC inhibition	CS	R-CS	P2	ictrace4	0.500357	0.00388587	200
PKCd	recall	aIC inhibition	CS	R-CS	P3	ictrace21	0.500357	0.00163644	200
PKCd	recall	aIC inhibition	CS	R-CS	P2	ictrace4t2	0.500357	0.00171261	200
PKCd	recall	aIC inhibition	CS	R-CS	P1	ictrace2t2	0.5	0	200
PKCd	recall	aIC inhibition	CS	R-CS	P1	ictrace5t2	0.5	0	200
PKCd	recall	aIC inhibition	CS	R-CS	P3	ictrace7t2	0.5	0	200
PKCd	recall	aIC inhibition	CS	R-CS	P3	ictrace19	0.499643	0.00118424	200
PKCd	recall	aIC inhibition	CS	R-CS	P3	ictrace22t2	0.499643	0.00147232	200
PKCd	recall	aIC inhibition	CS	R-CS	P1	ictrace15	0.499583	0.00171771	200
PKCd	recall	aIC inhibition	CS	R-CS	P1	ictrace16	0.499583	0.00150202	200
PKCd	recall	aIC inhibition	CS	R-CS	P1	ictrace3	0.499583	0.00190918	200
PKCd	recall	aIC inhibition	CS	R-CS	P1	ictrace10t2	0.499583	0.00190918	200
PKCd	recall	aIC inhibition	CS	R-CS	P1	ictrace12t2	0.499286	0.00142768	200
PKCd	recall	aIC inhibition	CS	R-CS	P1	ictrace14t2	0.499167	0.00144217	200
PKCd	recall	aIC inhibition	CS	R-CS	P1	ictrace12	0.49875	0.00149971	200
PKCd	recall	aIC inhibition	CS	R-CS	P1	ictrace4t2	0.498571	0.00123305	200
PKCd	recall	aIC inhibition	CS	R-CS	P1	ictrace7t2	0.498571	0.00159399	200
PKCd	recall	aIC inhibition	CS	R-CS	P3	ictrace8	0.498333	0.00185966	200
PKCd	recall	aIC inhibition	CS	R-CS	P3	ictrace18	0.498214	0.00128149	200
PKCd	recall	aIC inhibition	CS	R-CS	P1	ictrace15t2	0.498036	0.00134101	200
PKCd	recall	aIC inhibition	CS	R-CS	P2	ictrace15t2	0.4975	0.00165727	200
PKCd	recall	aIC inhibition	CS	R-CS	P3	ictrace17	0.497143	0.00158436	200
PKCd	recall	aIC inhibition	CS	R-CS	P3	ictrace17t2	0.497024	0.00310524	200
PKCd	recall	aIC inhibition	CS	R-CS	P3	ictrace10	0.496429	0.00116642	200
PKCd	recall	aIC inhibition	CS	R-CS	P1	ictrace4	0.49625	0.00179675	200
PKCd	recall	aIC inhibition	CS	R-CS	P3	ictrace1t2	0.496071	0.00385401	200
PKCd	recall	aIC inhibition	CS	R-CS	P3	ictrace13	0.49494	0.00161799	200
PKCd	recall	aIC inhibition	CS	R-CS	P1	ictrace16t2	0.49494	0.00148318	200
PKCd	recall	aIC inhibition	CS	R-CS	P3	ictrace4	0.494643	0.00214575	200
[truncated: 556 more rows]
