# Supplementary material for: The amygdala instructs insular feedback for affective learning
Source: eLife. 2020 Nov 20;9:e60336. doi: 10.7554/eLife.60336 (PMC7679142; doi:10.7554/eLife.60336)
Supplement: Figure 5—source data 2. [file elife-60336-fig5-data2.xlsx]

## Sheet: Panel D
figure supplement 3Bi (raw data for Figure 5Dii)
	GFP controls			CE(PKCd)-NBM
	preCS	R-CS	F-CS	preCS	R-CS	F-CS
Mouse 1	0	4.5	0	1.5	0	0
Mouse 2	0	0	1.5	1.5	3	0
Mouse 3	0.75	3	0	0	1.5	0
Mouse 4	0	0	0	0.75	0	1.5
Mouse 5	1.5	10.5	0	3	1.5	7.5
Mouse 6	0.75	3	0	0	1.5	0
Mouse 7	1.5	10.5	0
figure supplement 3Bii (raw data for Figure 5Dii)
	GFP controls			CE(PKCd)-NBM
	BL	R-CS	F-CS	BL	R-CS	F-CS
Mouse 1	1.73333	44.4	67.3	0.933333	12	59
Mouse 2	8.73333	29.7	65.9	0.066667	13.8	41.4
Mouse 3	3.53333	53.1	76.4	0.866667	45.4	55.9
Mouse 4	5.26667	29	62.9	0.533333	58.3	47.2
Mouse 5	2.8	31.5	86	0	2	31.4
Mouse 6	1.26667	42	92.2	0	8.6	18.8
Mouse 7	10.2915	36.3743	83.2483

## Sheet: Panel E
Panel E ii
SST
Recall(PBS)	0.785714	0.642857	0.75	0.666667	0.75	0.642857	0.642857	0.75	0.583333	0.583333	0.714286	0.571429	0.75	0.5	0.75	0.714286	0.785714	0.666667	0.75	0.75	0.642857	0.571429	0.75	0.583333	0.666667	0.642857	0.642857	0.5	0.5	0.416667	0.642857	0.857143	0.5	0.583333	0.666667	0.642857	0.714286	0.666667	0.5	0.666667	0.714286	0.571429	0.75	0.583333	0.583333	0.642857	0.857143	0.833333	0.583333
Recall(hM4(aIC))	0.571429	0.357143	0.5	0.416667	0.5	0.5	0.357143	0.416667	0.333333	0.5	0.571429	0.285714	0.416667	0.583333	0.5	0.428571	0.357143	0.5	0.5	0.5	0.5	0.285714	0.5	0.5	0.5	0.5	0.5	0.5	0.5	0.5	0.5	0.285714	0.583333	0.5	0.5	0.571429	0.214286	0.5	0.666667	0.5	0.428571	0.357143	0.583333	0.583333	0.5	0.571429	0.428571	0.583333	0.666667
PKCd
Recall(PBS)	0.714286	0.571429	0.916667	0.666667	0.666667	0.642857	0.642857	0.833333	0.75	0.583333	0.714286	0.642857	0.833333	0.75	0.833333	0.785714	0.571429	0.75	0.666667	0.666667	0.785714	0.571429	0.833333	0.75	0.583333	0.785714	0.642857	0.833333	0.833333	0.583333	0.714286	0.642857	0.833333	0.833333	0.666667	0.714286	0.714286	0.666667	0.75	0.666667	0.785714	0.714286	0.833333	0.666667	0.75	0.785714	0.714286	0.833333	0.833333
Recall(hM4(aIC))	0.714286	0.642857	0.583333	0.666667	0.5	0.714286	0.571429	0.833333	0.666667	0.5	0.785714	0.571429	0.666667	0.666667	0.583333	0.714286	0.714286	0.75	0.5	0.583333	0.714286	0.571429	0.75	0.583333	0.5	0.714286	0.5	0.75	0.583333	0.5	0.785714	0.571429	0.666667	0.583333	0.5	0.785714	0.642857	0.833333	0.583333	0.5	0.714286	0.642857	0.583333	0.75	0.5	0.714286	0.571429	0.833333	0.5
CEm
Recall(PBS)	0.714286	0.428571	0.5	0.583333	0.5	0.642857	0.5	0.583333	0.5	0.5	0.714286	0.571429	0.666667	0.583333	0.5	0.571429	0.571429	0.75	0.583333	0.416667	0.571429	0.571429	0.666667	0.5	0.5	0.714286	0.5	0.583333	0.5	0.5	0.714286	0.5	0.583333	0.583333	0.583333	0.642857	0.5	0.666667	0.583333	0.5	0.714286	0.5	0.5	0.5	0.5	0.642857	0.5	0.583333	0.5
Recall(hM4(aIC))	0.714286	0.5	0.583333	0.5	0.583333	0.785714	0.571429	0.583333	0.416667	0.583333	0.785714	0.714286	0.583333	0.5	0.583333	0.857143	0.642857	0.583333	0.5	0.583333	0.785714	0.642857	0.5	0.5	0.583333	0.857143	0.642857	0.666667	0.5	0.583333	0.785714	0.714286	0.5	0.5	0.583333	0.785714	0.642857	0.583333	0.5	0.583333	0.714286	0.5	0.666667	0.5	0.583333	0.714286	0.642857	0.666667	0.5
SST - shuffled
Recall(PBS)	0.571429	0.5	0.583333	0.5	0.5	0.642857	0.428571	0.25	0.583333	0.666667	0.428571	0.357143	0.583333	0.5	0.416667	0.642857	0.714286	0.416667	0.583333	0.5	0.571429	0.5	0.416667	0.666667	0.416667	0.5	0.142857	0.333333	0.583333	0.416667	0.428571	0.5	0.583333	0.25	0.583333	0.5	0.428571	0.583333	0.5	0.5	0.285714	0.357143	0.666667	0.666667	0.416667	0.357143	0.428571	0.416667	0.583333
Recall(hM4(aIC))	0.642857	0.571429	0.5	0.75	0.583333	0.785714	0.5	0.75	0.583333	0.583333	0.5	0.5	0.416667	0.416667	0.583333	0.428571	0.571429	0.75	0.416667	0.5	0.714286	0.5	0.333333	0.666667	0.5	0.642857	0.5	0.5	0.416667	0.416667	0.5	0.428571	0.5	0.333333	0.416667	0.285714	0.5	0.416667	0.5	0.583333	0.285714	0.5	0.333333	0.25	0.333333	0.5	0.357143	0.75	0.333333
PKCd - shuffled
Recall(PBS)	0.7	0.3	0.8	0.4	0.625	0.5	0.3	0.8	0.5	0.375	0.7	0.7	0.5	0.6	0.375	0.4	0.5	0.3	0.6	0.375	0.3	0.6	0.5	0.5	0.25	0.6	0.3	0.5	0.5	0.375	0.6	0.3	0.4	0.3	0.375	0.5	0.4	0.4	0.5	0.625	0.3	0.3	0.8	0.4	0.375	0.5	0.5	0.7	0.7
Recall(hM4(aIC))	0.5	0.285714	0.25	0.416667	0.666667	0.214286	0.428571	0.333333	0.333333	0.166667	0.357143	0.428571	0.75	0.333333	0.333333	0.571429	0.5	0.666667	0.583333	0.75	0.571429	0.5	0.333333	0.333333	0.416667	0.357143	0.285714	0.5	0.5	0.333333	0.5	0.428571	0.583333	0.583333	0.416667	0.428571	0.571429	0.416667	0.5	0.75	0.5	0.571429	0.333333	0.666667	0.5	0.571429	0.714286	0.5	0.583333
CEm - shuffled
Recall(PBS)	0.5	0.5	0.416667	0.416667	0.5	0.5	0.642857	0.5	0.583333	0.583333	0.785714	0.428571	0.666667	0.583333	0.583333	0.642857	0.571429	0.583333	0.5	0.583333	0.428571	0.5	0.5	0.416667	0.5	0.357143	0.5	0.333333	0.5	0.5	0.571429	0.571429	0.5	0.416667	0.5	0.357143	0.5	0.5	0.5	0.583333	0.642857	0.5	0.416667	0.5	0.416667	0.5	0.5	0.416667	0.5
Recall(hM4(aIC))	0.571429	0.571429	0.5	0.583333	0.583333	0.714286	0.642857	0.666667	0.583333	0.5	0.5	0.571429	0.583333	0.5	0.5	0.571429	0.5	0.583333	0.666667	0.5	0.5	0.5	0.5	0.583333	0.5	0.642857	0.5	0.416667	0.5	0.5	0.428571	0.428571	0.583333	0.583333	0.416667	0.571429	0.428571	0.75	0.5	0.5	0.357143	0.428571	0.25	0.5	0.416667	0.571429	0.571429	0.5	0.583333
Panel E iii
SST
Recall(PBS)	0.5	0.515625	0.46875	0.484375	0.46875	0.53125	0.5	0.484375	0.515625	0.484375	0.5	0.453125	0.5	0.5	0.46875	0.5	0.5	0.5	0.484375	0.5	0.515625	0.515625	0.484375	0.46875	0.515625	0.46875	0.484375	0.484375	0.484375	0.515625	0.5	0.515625	0.484375	0.5	0.5	0.515625	0.46875	0.515625	0.5	0.5	0.4375	0.484375	0.4375	0.453125	0.421875	0.4375	0.4375	0.453125	0.4375
Recall(hM4(aIC))	0.390625	0.421875	0.375	0.375	0.40625	0.390625	0.453125	0.390625	0.4375	0.40625	0.421875	0.390625	0.4375	0.390625	0.40625	0.390625	0.421875	0.4375	0.421875	0.40625	0.390625	0.40625	0.40625	0.40625	0.40625	0.40625	0.421875	0.390625	0.390625	0.390625	0.390625	0.40625	0.4375	0.421875	0.390625	0.40625	0.40625	0.40625	0.453125	0.40625	0.421875	0.4375	0.453125	0.375	0.421875	0.421875	0.4375	0.421875	0.421875
PKCd
Recall(PBS)	0.375	0.390625	0.375	0.359375	0.40625	0.390625	0.375	0.375	0.40625	0.390625	0.390625	0.390625	0.40625	0.40625	0.390625	0.375	0.390625	0.4375	0.390625	0.40625	0.375	0.40625	0.421875	0.390625	0.390625	0.390625	0.375	0.390625	0.40625	0.421875	0.40625	0.375	0.421875	0.390625	0.40625	0.421875	0.40625	0.375	0.390625	0.375	0.4375	0.421875	0.453125	0.4375	0.484375	0.4375	0.453125	0.421875	0.4375
Recall(hM4(aIC))	0.515625	0.5	0.484375	0.5	0.515625	0.484375	0.46875	0.484375	0.5	0.515625	0.484375	0.484375	0.484375	0.5	0.515625	0.484375	0.5	0.46875	0.515625	0.484375	0.484375	0.515625	0.515625	0.484375	0.484375	0.5	0.46875	0.484375	0.5	0.46875	0.46875	0.484375	0.5	0.515625	0.484375	0.5	0.5	0.515625	0.5	0.515625	0.453125	0.453125	0.46875	0.484375	0.453125	0.46875	0.46875	0.46875	0.46875
CEm
Recall(PBS)	0.46875	0.453125	0.453125	0.46875	0.46875	0.46875	0.453125	0.46875	0.46875	0.46875	0.453125	0.46875	0.46875	0.46875	0.46875	0.46875	0.46875	0.46875	0.46875	0.46875	0.46875	0.46875	0.46875	0.46875	0.46875	0.453125	0.453125	0.46875	0.453125	0.46875	0.46875	0.46875	0.46875	0.453125	0.46875	0.46875	0.46875	0.453125	0.46875	0.46875	0.453125	0.46875	0.46875	0.46875	0.453125	0.46875	0.46875	0.46875	0.46875
Recall(hM4(aIC))	0.546875	0.546875	0.546875	0.546875	0.546875	0.546875	0.546875	0.546875	0.5625	0.578125	0.546875	0.546875	0.546875	0.546875	0.5625	0.546875	0.546875	0.5625	0.546875	0.546875	0.5625	0.546875	0.546875	0.5625	0.546875	0.546875	0.546875	0.5625	0.5625	0.5625	0.5625	0.578125	0.546875	0.546875	0.546875	0.546875	0.5625	0.5625	0.5625	0.546875	0.390625	0.359375	0.390625	0.390625	0.390625	0.390625	0.390625	0.390625	0.390625
SST - shuffled
Recall(PBS)	0.46875	0.609375	0.453125	0.46875	0.515625	0.546875	0.484375	0.515625	0.5625	0.484375	0.46875	0.546875	0.453125	0.4375	0.515625	0.484375	0.46875	0.515625	0.4375	0.53125	0.578125	0.453125	0.46875	0.484375	0.484375	0.46875	0.5	0.46875	0.546875	0.5	0.421875	0.578125	0.53125	0.4375	0.53125	0.484375	0.515625	0.453125	0.453125	0.453125	0.46875	0.546875	0.46875	0.46875	0.578125	0.421875	0.453125	0.375	0.515625
Recall(hM4(aIC))	0.5625	0.546875	0.484375	0.4375	0.453125	0.5625	0.515625	0.484375	0.515625	0.46875	0.5	0.484375	0.5	0.4375	0.46875	0.546875	0.484375	0.46875	0.453125	0.484375	0.546875	0.546875	0.453125	0.5	0.453125	0.421875	0.46875	0.546875	0.453125	0.46875	0.578125	0.484375	0.421875	0.625	0.453125	0.53125	0.546875	0.453125	0.484375	0.484375	0.4375	0.625	0.4375	0.515625	0.5	0.515625	0.53125	0.515625	0.5
PKCd - shuffled
Recall(PBS)	0.46875	0.515625	0.53125	0.40625	0.53125	0.453125	0.515625	0.5	0.390625	0.4375	0.46875	0.484375	0.53125	0.484375	0.578125	0.453125	0.421875	0.53125	0.640625	0.453125	0.5625	0.53125	0.515625	0.59375	0.390625	0.40625	0.578125	0.5	0.515625	0.484375	0.453125	0.53125	0.578125	0.640625	0.4375	0.515625	0.5	0.59375	0.53125	0.453125	0.40625	0.484375	0.4375	0.5	0.640625	0.546875	0.46875	0.546875	0.46875
Recall(hM4(aIC))	0.546875	0.421875	0.546875	0.515625	0.5	0.53125	0.390625	0.484375	0.546875	0.421875	0.546875	0.5625	0.625	0.484375	0.53125	0.484375	0.421875	0.46875	0.515625	0.359375	0.5	0.375	0.5	0.546875	0.546875	0.53125	0.484375	0.515625	0.546875	0.515625	0.46875	0.515625	0.5	0.515625	0.59375	0.5625	0.4375	0.53125	0.46875	0.46875	0.484375	0.546875	0.546875	0.421875	0.390625	0.453125	0.46875	0.53125	0.53125
CEm - shuffled
Recall(PBS)	0.515625	0.484375	0.5	0.5	0.46875	0.5	0.46875	0.46875	0.484375	0.46875	0.5	0.46875	0.515625	0.515625	0.5625	0.53125	0.5	0.5	0.515625	0.53125	0.5625	0.4375	0.53125	0.53125	0.46875	0.5	0.453125	0.46875	0.5	0.5	0.53125	0.515625	0.546875	0.53125	0.4375	0.53125	0.53125	0.515625	0.46875	0.5	0.5	0.53125	0.46875	0.46875	0.5	0.5	0.5	0.5	0.5
Recall(hM4(aIC))	0.546875	0.5	0.46875	0.46875	0.578125	0.46875	0.484375	0.484375	0.515625	0.515625	0.421875	0.453125	0.484375	0.578125	0.453125	0.46875	0.484375	0.546875	0.46875	0.515625	0.484375	0.484375	0.546875	0.453125	0.515625	0.484375	0.515625	0.5	0.484375	0.515625	0.484375	0.421875	0.484375	0.515625	0.578125	0.46875	0.53125	0.46875	0.5	0.609375	0.359375	0.53125	0.484375	0.46875	0.546875	0.546875	0.5625	0.53125	0.625
Panel E iv
SST
C(PBS)	0.490385	0.490385	0.504808	0.5	0.5	0.504808	0.495192	0.519231	0.5	0.5	0.495192	0.490385	0.504808	0.5	0.5	0.495192	0.5	0.5	0.5	0.490385	0.490385	0.495192	0.504808	0.495192	0.495192	0.495192	0.504808	0.5	0.5	0.5	0.5	0.509615	0.495192	0.504808	0.490385	0.495192	0.495192	0.490385	0.490385	0.5	0.490385	0.485577	0.471154	0.471154	0.471154	0.471154	0.456731	0.490385	0.480769
C(hM4(aIC))	0.509615	0.504808	0.495192	0.519231	0.504808	0.490385	0.495192	0.495192	0.5	0.514423	0.5	0.495192	0.5	0.509615	0.495192	0.504808	0.5	0.504808	0.5	0.5	0.504808	0.514423	0.490385	0.5	0.495192	0.490385	0.5	0.514423	0.504808	0.504808	0.504808	0.514423	0.509615	0.509615	0.495192	0.504808	0.504808	0.495192	0.509615	0.509615	0.504808	0.519231	0.524038	0.524038	0.5	0.495192	0.504808	0.524038	0.514423
PKCd
C(PBS)	0.489583	0.486979	0.497396	0.484375	0.481771	0.484375	0.494792	0.479167	0.489583	0.484375	0.484375	0.5	0.484375	0.486979	0.479167	0.492188	0.497396	0.494792	0.494792	0.497396	0.484375	0.479167	0.5	0.486979	0.476563	0.486979	0.486979	0.489583	0.484375	0.489583	0.486979	0.492188	0.484375	0.481771	0.486979	0.484375	0.494792	0.492188	0.481771	0.473958	0.489583	0.479167	0.481771	0.484375	0.479167	0.489583	0.486979	0.484375	0.479167
C(hM4(aIC))	0.53125	0.515625	0.53125	0.526042	0.53125	0.53125	0.546875	0.536458	0.526042	0.520833	0.546875	0.536458	0.515625	0.520833	0.520833	0.557292	0.536458	0.53125	0.526042	0.526042	0.515625	0.536458	0.541667	0.5625	0.520833	0.541667	0.526042	0.546875	0.526042	0.520833	0.520833	0.541667	0.515625	0.520833	0.53125	0.53125	0.552083	0.536458	0.536458	0.536458	0.59375	0.578125	0.598958	0.567708	0.59375	0.598958	0.578125	0.578125	0.604167
CEm
C(PBS)	0.5	0.5	0.5	0.5	0.5	0.5	0.5	0.5	0.5	0.5	0.5	0.5	0.5	0.5	0.5	0.5	0.5	0.5	0.5	0.5	0.5	0.5	0.5	0.5	0.5	0.5	0.5	0.5	0.5	0.5	0.5	0.5	0.5	0.5	0.5	0.5	0.5	0.5	0.5	0.5	0.475962	0.475962	0.475962	0.475962	0.471154	0.514423	0.514423	0.475962	0.471154
C(hM4(aIC))	0.5	0.5	0.5	0.5	0.5	0.5	0.5	0.5	0.5	0.5	0.5	0.5	0.5	0.5	0.5	0.5	0.5	0.5	0.5	0.5	0.5	0.5	0.5	0.5	0.5	0.5	0.5	0.5	0.5	0.5	0.5	0.5	0.5	0.5	0.5	0.5	0.5	0.5	0.5	0.5	0.515625	0.494792	0.505208	0.5	0.520833	0.489583	0.494792	0.510417	0.510417
SST - shuffled
C(PBS)	0.5	0.505208	0.494792	0.510417	0.484375	0.5	0.505208	0.494792	0.494792	0.510417	0.505208	0.515625	0.494792	0.515625	0.489583	0.494792	0.484375	0.505208	0.505208	0.505208	0.515625	0.505208	0.510417	0.505208	0.494792	0.510417	0.5	0.505208	0.510417	0.494792	0.489583	0.5	0.5	0.505208	0.505208	0.505208	0.515625	0.515625	0.5	0.5	0.505208	0.510417	0.473958	0.494792	0.505208	0.536458	0.494792	0.453125	0.520833
C(hM4(aIC))	0.490385	0.485577	0.485577	0.514423	0.504808	0.548077	0.475962	0.533654	0.490385	0.519231	0.5	0.509615	0.524038	0.5	0.509615	0.490385	0.524038	0.5	0.528846	0.514423	0.475962	0.461538	0.495192	0.528846	0.466346	0.5	0.490385	0.519231	0.485577	0.543269	0.5	0.514423	0.5	0.5	0.485577	0.456731	0.5	0.528846	0.509615	0.480769	0.538462	0.504808	0.475962	0.466346	0.490385	0.533654	0.466346	0.490385	0.504808
PKCd - shuffled
C(PBS)	0.494792	0.492188	0.497396	0.523438	0.473958	0.471354	0.505208	0.486979	0.494792	0.473958	0.494792	0.507813	0.513021	0.523438	0.481771	0.481771	0.505208	0.502604	0.513021	0.466146	0.518229	0.492188	0.5	0.492188	0.528646	0.494792	0.481771	0.455729	0.489583	0.484375	0.486979	0.520833	0.507813	0.505208	0.518229	0.505208	0.497396	0.53125	0.533854	0.486979	0.489583	0.505208	0.502604	0.46875	0.492188	0.515625	0.481771	0.505208	0.489583
C(hM4(aIC))	0.479167	0.505208	0.489583	0.442708	0.5	0.463542	0.515625	0.588542	0.515625	0.484375	0.515625	0.505208	0.505208	0.5	0.463542	0.5	0.484375	0.505208	0.572917	0.489583	0.484375	0.463542	0.5	0.447917	0.447917	0.442708	0.46875	0.598958	0.489583	0.46875	0.583333	0.46875	0.536458	0.515625	0.458333	0.442708	0.510417	0.484375	0.479167	0.494792	0.494792	0.463542	0.541667	0.453125	0.546875	0.53125	0.53125	0.510417	0.442708
CEm - shuffled
C(PBS)	0.53125	0.494792	0.510417	0.557292	0.520833	0.541667	0.489583	0.53125	0.494792	0.479167	0.557292	0.473958	0.494792	0.453125	0.5	0.520833	0.510417	0.520833	0.505208	0.5	0.505208	0.484375	0.520833	0.536458	0.447917	0.5625	0.4375	0.463542	0.484375	0.505208	0.5	0.510417	0.53125	0.484375	0.536458	0.473958	0.494792	0.526042	0.5	0.536458	0.473958	0.526042	0.515625	0.510417	0.494792	0.505208	0.5	0.515625	0.510417
C(hM4(aIC))	0.5	0.5	0.5	0.5	0.5	0.5	0.5	0.5	0.5	0.5	0.5	0.5	0.5	0.5	0.5	0.5	0.5	0.5	0.5	0.5	0.5	0.5	0.5	0.5	0.5	0.5	0.5	0.5	0.5	0.5	0.5	0.5	0.5	0.5	0.5	0.5	0.5	0.5	0.5	0.5	0.505208	0.46875	0.505208	0.5	0.515625	0.494792	0.484375	0.53125	0.494792
[truncated: 751 more columns]
